1 **Novel genetic basis of resistance to Bt toxin Cry1Ac in *Helicoverpa zea***

2

3 Kyle M. Benowitz<sup>1,2,\*</sup>, Carson W. Allan<sup>1</sup>, Benjamin A. Degain<sup>1</sup>, Xianchun Li<sup>1</sup>, Jeffrey A. Fabrick<sup>3</sup>,  
4 Bruce E. Tabashnik<sup>1</sup>, Yves Carrière<sup>1</sup>, Luciano M. Matzkin<sup>1,4,5</sup>

5 <sup>1</sup>Department of Entomology, University of Arizona, Tucson, AZ, USA

6 <sup>2</sup>Department of Biology, Austin Peay State University, Clarksville, TN, USA

7 <sup>3</sup>U.S. Department of Agriculture, Agricultural Research Service, U.S. Arid Land Agricultural Research Center,  
8 Maricopa, AZ, USA

9 <sup>4</sup>Department of Ecology and Evolutionary Biology, University of Arizona, Tucson, AZ, USA

10 <sup>5</sup>Bio5 Institute, University of Arizona, Tucson, AZ, USA

11

12 Corresponding author: Kyle M. Benowitz. Department of Biology, Austin Peay State University, Sundquist Science  
13 Center, PO Box 4718, Clarksville, TN 37044. Email: [benowitzk@apsu.edu](mailto:benowitzk@apsu.edu)

14

15

16 **Running Title:** *Novel genetic basis of Bt resistance*

17 **Abstract**

18 Crops genetically engineered to produce insecticidal proteins from the bacterium *Bacillus*  
19 *thuringiensis* (Bt) have advanced pest management, but their benefits are diminished when  
20 pests evolve resistance. Elucidating the genetic basis of pest resistance to Bt toxins can improve  
21 resistance monitoring, resistance management, and design of new insecticides. Here, we  
22 investigated the genetic basis of resistance to Bt toxin Cry1Ac in the lepidopteran *Helicoverpa*  
23 *zea*, one of the most damaging crop pests in the United States. To facilitate this research, we  
24 built the first chromosome-level genome assembly for this species, which has 31 chromosomes  
25 containing 375 Mb and 15,482 predicted proteins. Using a genome-wide association study, fine-  
26 scale mapping, and RNA-seq, we identified a 250-kb quantitative trait locus (QTL) on  
27 chromosome 13 that was strongly associated with resistance in a strain of *H. zea* that had been  
28 selected for resistance in the field and lab. The mutation in this QTL contributed to but was not  
29 sufficient for resistance, which implies alleles in more than one gene contributed to resistance.  
30 This QTL contains no genes with a previously reported role in resistance or susceptibility to Bt  
31 toxins. However, in resistant insects, this QTL has a premature stop codon in a kinesin gene  
32 which is a primary candidate as a mutation contributing to resistance. We found no changes in  
33 gene sequence or expression consistently associated with resistance for 11 genes previously  
34 implicated in lepidopteran resistance to Cry1Ac. Thus, the results reveal a novel and polygenic  
35 basis of resistance.

36

37 **Keywords:** *Bacillus thuringiensis*; genome wide association study; genome assembly; insecticide  
38 resistance; kinesin; Lepidoptera; transgenic crops

39

40

## 41 Introduction

42 Crops genetically engineered to produce insecticidal proteins from *Bacillus thuringiensis* (Bt)  
43 have provided control of some key pests during the past 25 years while reducing insecticide  
44 sprays and conserving arthropod natural enemies (Bravo *et al.* 2011; NASEM 2016; Dively *et al.*  
45 2018; Romeis *et al.* 2018; Carrière *et al.* 2020a; Tabashnik *et al.* 2021). However, planting of a  
46 cumulative total of more than one billion hectares of Bt crops worldwide (ISAAA 2019) has  
47 selected for resistance that has reduced the efficacy of Bt crops against populations of at least  
48 nine major pest species (Calles-Torrez *et al.* 2019; Smith *et al.* 2019; Tabashnik and Carrière  
49 2019). Knowledge of the genetic basis of pest resistance to Bt toxins can be useful for improving  
50 monitoring and management of resistance, as well as for designing new insecticides (Soberón *et*  
51 *al.* 2007; Jin *et al.* 2018).

52 Resistance to crystalline (Cry) Bt toxins typically entails mutations that reduce binding of the  
53 toxins to larval midgut receptors and thus block an essential step in the mode of action (Heckel *et*  
54 *al.* 2007; Peterson *et al.* 2017; Jurat-Fuentes *et al.* 2021). In particular, research has repeatedly  
55 implicated disruption or reduced expression of known or putative Bt toxin receptors from four  
56 protein families: ATP-binding cassette (ABC), cadherin, aminopeptidase N (APN), and alkaline  
57 phosphatase (ALP). Mutations that disrupt binding of toxins to receptors are frequently  
58 associated with high levels of resistance to one or a few closely related Bt toxins, weak or no  
59 cross-resistance to unrelated Bt toxins, and recessive inheritance of resistance (Mode 1  
60 resistance; Tabashnik *et al.* 1998). Nonetheless, lepidopteran resistance to Bt toxins also includes  
61 examples where proteins from these families are not involved, toxin binding is not reduced, and  
62 inheritance of resistance is not recessive (Peterson *et al.* 2017; Jin *et al.* 2018).

63 Here we analyzed the genetic basis of resistance to Bt toxin Cry1Ac in the lepidopteran  
64 *Helicoverpa zea* (corn earworm or bollworm), which is one of the most economically important  
65 crop pests in the United States (Cook and Threet 2019; Musser *et al.* 2019). This polyphagous  
66 pest is the first insect reported to have evolved resistance to a Bt crop, specifically to cotton  
67 producing Cry1Ac (Luttrell *et al.* 1999; Ali *et al.* 2006; Tabashnik *et al.* 2008; Reisig *et al.*  
68 2018). In contrast with Mode 1 resistance, inheritance of resistance to Cry1Ac in *H. zea* is not  
69 completely recessive (Brévault *et al.* 2013, 2015; Carrière *et al.* 2020b; Reisig *et al.* 2021).

70 Caccia *et al.* (2012) concluded that resistance in their lab-selected AR1 strain of *H. zea* was  
71 complex, possibly polygenic, and not caused primarily by reduced binding of Cry1Ac to larval  
72 midgut membranes. Perera *et al.* (2021) found that knocking out the gene encoding the putative  
73 Cry1Ac receptor ABCC2 increased the concentration of Cry1Ac killing 50% of larvae (LC<sub>50</sub>) by  
74 7- to 40-fold. Because >100-fold resistance to Cry1Ac is common in lab- and field-selected *H.*  
75 *zea* (Caccia *et al.* 2012; Brévault *et al.* 2013; Reisig *et al.* 2018; Kaur *et al.* 2019), they inferred  
76 that mutations disrupting ABCC2 are not the sole or primary mechanism of resistance to Cry1Ac  
77 in *H. zea*. Although most previous studies of Bt resistance in *H. zea* have emphasized the gene  
78 families listed above (Caccia *et al.* 2012; Zhang *et al.* 2019a; Fritz *et al.* 2020; Perera *et al.* 2021;  
79 Taylor *et al.* 2021), additional candidates have been identified using RNA-seq (Lawrie *et al.*  
80 2020; 2022).

81 Our work focuses on the GA-R strain of *H. zea*, which had been selected for resistance to Bt  
82 toxins in the field and lab (Brévault *et al.* 2013, Welch *et al.* 2015). GA-R was derived from the  
83 moderately resistant GA strain, which had been selected for resistance to Bt toxins only in the  
84 field (Brévault *et al.* 2013). Relative to an unrelated susceptible lab strain (LAB-S) of *H. zea*, the  
85 LC<sub>50</sub> of Cry1Ac was >500 times higher for GA-R and 55 times higher for GA (Brévault *et al.*  
86 2013). Previous work identified reduced activation of Cry1Ac by midgut proteases as a potential  
87 field-selected mechanism of resistance that could explain part but not all of the resistance in GA-  
88 R relative to LAB-S (Zhang *et al.* 2019a). Overall, the previous results with GA-R and other  
89 strains of *H. zea* summarized above led us to hypothesize that resistance to Cry1Ac in this  
90 species is polygenic and entails novel genetic mechanisms. Accordingly, genome-wide mapping  
91 approaches are warranted, but have been hindered because the only *H. zea* genome assembly  
92 available is highly fragmented (Pearce *et al.* 2017).

93 Here, we generated a chromosome-level genome for *H. zea*, then used a genome wide  
94 association study (GWAS), fine-scale mapping, and RNA-seq to elucidate the genetic basis of  
95 resistance to Cry1Ac in the GA-R strain of *H. zea*. We identified a quantitative trait locus (QTL)  
96 of 250 kb on chromosome 13 that was strongly associated with resistance to Cry1Ac. The results  
97 indicate a mutation in this QTL contributed to resistance but was not sufficient for resistance in  
98 GA-R. We also found no consistent association between resistance to Cry1Ac and any of 11  
99 genes previously implicated in lepidopteran resistance to Bt toxins. We conclude the genetic

100 basis of resistance to Cry1Ac in GA-R is novel and polygenic.

101

## 102 **Materials and methods**

### 103 **Insect strains**

104 We used four strains of *H. zea*: the highly resistant strain GA-R, its moderately resistant parent  
105 strain GA, the unrelated susceptible strain LAB-S, and the heterogeneous strain GA-RS that we  
106 created by crossing GA-R with LAB-S as described below. LAB-S was obtained from Benzon  
107 Research Inc. (Carlisle, PA, USA) and has not been exposed to Bt toxins or other insecticides.  
108 The resistant strain GA-R was derived from the third generation (F3) of the GA strain, which  
109 was started with 180 larvae collected on Cry1Ab corn from Tifton, Georgia in 2008 (Brévault *et*  
110 *al.*, 2013). GA-R was initially selected with Cry1Ac for nine generations and with MVPII  
111 thereafter (Brévault *et al.* 2013; Fritz *et al.* 2020; Carrière *et al.* 2020b). MVPII is a liquid  
112 formulation of a hybrid protoxin produced by transgenic *Pseudomonas fluorescens*. The amino  
113 acid sequence of the active portion of the protoxin is identical in the hybrid protoxin and Cry1Ac  
114 (Welch *et al.* 2015). For simplicity, hereafter we refer to MVPII as Cry1Ac. Amino acid  
115 sequence similarity between Cry1Ab and Cry1Ac is 86% (Carrière *et al.* 2015). Lab selection  
116 with Cry1Ac caused cross-resistance to Cry1Ab in GA-R (Welch *et al.* 2015) and in the AR  
117 strain of *H. zea* (Anilkumar *et al.* 2008). Moreover, adoption of Cry1Ac-producing cotton, a host  
118 plant of *H. zea*, was 94% in Georgia in 2008 (USDA 2008) and high in several preceding years  
119 (USDA 2020). Thus, the observed resistance to Cry1Ac in the GA strain (Brévault *et al.* 2013)  
120 could reflect direct selection in the field with Cry1Ac, cross-resistance from selection in the field  
121 with Cry1Ab, or both.

122 We conducted all rearing in walk-in growth chambers at  $27 \pm 1^\circ\text{C}$  with 14h light: 10h dark  
123 photoperiod. We reared larvae on a casein-based wheat germ diet (Orpet *et al.* 2015a, 2015b) and  
124 conducted larval bioassays on Southland diet (Southland Products, Inc., Lake Village, AR,  
125 USA). We use these two different diets to optimize larval development and surface uniformity  
126 for toxin overlay in bioassays, respectively (Carrière *et al.* 2020b). Moths were kept in walk-in  
127 growth chambers under the same temperature and photoperiod mentioned above but under higher

128 relative humidity than for larvae (60% Rh for moths and 20% Rh for larvae). Moths had access  
129 to a 10% sugar water solution for feeding and cheese cloth for oviposition (Welch *et al.* 2015).  
130 As previously reported (Fritz *et al.* 2020), we reared ca. 600 moths per generation for the first 35  
131 and 33 generations of GA and GA-R, respectively. In 2012, we crossed GA with GA-R and used  
132 the resulting progeny to continue GA-R (Carrière *et al.* 2020b). After this interstrain cross, to  
133 reduce genetic drift and inbreeding, we reared two subsets of GA and crossed the two subsets  
134 every one to three generations (Carrière *et al.* 2020b). We used the same procedure to rear and  
135 cross two subsets of GA-R. Each subset had ca. 600 moths per generation (ca. 1200 moths per  
136 strain per generation). For GA, the mean number of moths per generation for F1 to F72 was ca.  
137 900, based on the number of moths per generation of 600 for F1-F36 and 1200 for F37-72.

138 Relative to GA, GA-R had significantly higher survival on Bt cotton (producing Cry1Ac,  
139 Cry1Ac + Cry2Ab, or Cry1Ac + Cry1F) and Bt corn producing Cry1A.105 + Cry2Ab (Brévault  
140 *et al.* 2013, 2015; Carrière *et al.* 2018, 2019, 2020b, 2021). At the time we crossed GA-R with  
141 LAB-S in May 2018, we had selected GA-R with Cry1Ac for 58 generations. The GA-RS strain  
142 was created using mass reciprocal crosses between GA-R and LAB-S (i.e., 120 GA-R females ×  
143 120 LAB-S males and 120 LAB-S females × 120 GA-R males). GA-RS was founded with 450  
144 neonates from each reciprocal cross. In the founding and subsequent generations, 900 larvae  
145 were reared and 600 adults (sex ratio 1:1) produced the neonates used for propagating the next  
146 generation.

147

## 148 **Genome sequencing of resistant strain GA-R**

149 We generated a *de novo* genome assembly for GA-R using an approach combining a hybrid  
150 short- and long-read assembly with a long-read only assembly (Jaworski *et al.* 2020), which  
151 allows for improved error correction of long read data (Ye *et al.* 2016) without the need for  
152 massive coverage (Chakraborty *et al.* 2016). Hybrid assembly strategies have been used  
153 frequently with error-prone PacBio CLR data to generate highly contiguous genomes in non-  
154 model insect species (Hartke *et al.* 2019; Wan *et al.* 2019; Ferguson *et al.* 2020; Jaworski *et al.*  
155 2020; Ma *et al.* 2020; Mathers 2020; Schmidt *et al.* 2020; Xu *et al.* 2021). For the short-read

156 assembly, we collected and sequenced 30 GA-R larvae as described below. We trimmed reads  
157 and generated the assembly using Platanus (Kajitani *et al.* 2014). For the long-read assembly, we  
158 extracted DNA from the gut of a single GA-R fifth instar using a chloroform-based extraction  
159 method (Jaworski *et al.* 2020). PacBio libraries were constructed at the Arizona Genomics  
160 Institute (Tucson, AZ, USA). We then sequenced the library on a single lane of PacBio Sequel II,  
161 also at the Arizona Genomics Institute. We formatted raw PacBio reads using bam2fastq  
162 (<https://github.com/jts/bam2fastq>) and SeqKit (Shen *et al.* 2016) before filtering out all reads  
163 under 30-kb using Filtrlong (<https://github.com/rrwick/Filtrlong>). We mapped contigs from the  
164 short-read assembly to the long reads using DBG2OLC (Ye *et al.* 2016) before running three  
165 iterations of Sparc (Ye and Ma 2016) to correct the resulting contigs. We realigned the raw  
166 PacBio reads to the resulting assembly with pbmm2  
167 (<https://github.com/PacificBiosciences/pbmm2>) and polished contigs using Arrow (Chin *et al.*  
168 2013; <https://github.com/PacificBiosciences/GenomicConsensus>). Lastly, we mapped raw short  
169 reads to the assembly with Bowtie2 (Langmead and Salzberg 2012) to perform a final polishing  
170 step using Pilon (Walker *et al.* 2014).

171 We generated the PacBio-only assembly with Canu (Koren *et al.* 2017), using the reads longer  
172 than 30kb after filtering described above. We then polished the assembly using Arrow and Pilon  
173 as described above. Finally, we used Purge Haplotigs (Roach *et al.* 2018) to remove contigs  
174 containing alternate haplotypes generated due to high heterozygosity.

175 We aligned the two assemblies using nucmer within MUMmer4 (Marçais *et al.* 2018), keeping  
176 only alignments greater than 10 kb. We then generated the merged assembly using Quickmerge  
177 (Chakraborty *et al.* 2016). We performed additional merging by re-running Quickmerge with  
178 more liberal parameters on individual contig pairs after hypothesizing their contiguity based on  
179 synteny with *H. armigera* (Pearce *et al.* 2017; Valencia-Montoya *et al.* 2020). Specifically,  
180 chromosomes 5, 7, 8, 16, 17, 18, 19, 21, 23, 29, and 30 required such additional merging. After  
181 this step, only chromosome 17 had two contigs that did not merge. We therefore connected them  
182 with a default 100-bp gap according to NCBI standards (Karsch-Mizrachi *et al.* 2012). We again  
183 polished the final assembly using Arrow, Pilon, and Purge Haplotigs as above. Lastly, we  
184 ordered and named each chromosome to align with those of *H. armigera*. We generated a  
185 synteny plot comparing our genome to the *H. armigera* genome using Dot

186 (<https://github.com/marianattestad/dot>) after filtering out alignments under 4000 bp in NUCmer.

187 We analyzed the completeness of the GA-R genome using BUSCO v.5 (Seppey *et al.* 2019),  
188 comparing genomic content against the lepidoptera\_odb10 set of 5,286 conserved single copy  
189 genes. We calculated contig (before final merging of chromosome 17) and scaffold (final  
190 assembly) genome summary statistics with bbmap stats  
191 (<https://sourceforge.net/projects/bbmap/>). We calculated repeat content with RepeatModeler2  
192 (Flynn *et al.* 2020) and RepeatMasker (Smit *et al.* 2013-2015). We provide a preliminary  
193 annotation produced following the funannotate pipeline (Palmer and Stajich 2020) with  
194 transcripts from *H. armigera* and proteins from *B. mori* used as evidence supporting putative  
195 annotations. We also used BUSCO v.5 to assess the completeness and accuracy of the annotation  
196 against the 5,286 single copy genes in the lepidoptera\_odb10 dataset. To compare the quality of  
197 our assembly and annotation with the previous *H. zea* genome assembly (Pearce *et al.* 2017), we  
198 reanalyzed the genomic and proteomic BUSCO scores of that assembly against the same  
199 lepidoptera\_odb10 dataset.

200

## 201 **Phenotyping of Cry1Ac-susceptible and -resistant larvae for genetic mapping**

202 We used our standard diet overlay bioassay (Welch *et al.* 2015) to characterize GA-RS larvae as  
203 susceptible or resistant to Cry1Ac. We added 40  $\mu$ l of a dilution containing 0.1% Triton X-100  
204 and the desired concentration of Cry1Ac to the surface of solidified Southland diet in each well  
205 of 128-well bioassay trays (C-D International, Pitman, NJ, USA). One neonate (< 8 h old) was  
206 transferred to each well and trays were covered with ventilated plastic lids (C-D International)  
207 and held for 7 days under the abiotic conditions mentioned above.

208 We conducted five sets of bioassays using GA-RS neonates from the F2 (July 2018), F12 (July  
209 2019), F22 (June 2020), F23 (July 2020), and F26 (October 2020) generations (Supplementary  
210 Table S1). Neonates were exposed to diet with 0 (control), 1, or 10  $\mu$ g Cry1Ac per  $\text{cm}^2$  diet.  
211 After 7 days, live first instar larvae on diet with 1  $\mu$ g Cry1Ac per  $\text{cm}^2$  were considered  
212 susceptible because this low toxin concentration inhibited their growth, whereas live larvae on  
213 diet with 10  $\mu$ g Cry1Ac per  $\text{cm}^2$  that were third or subsequent instars were considered resistant



214 because they grew well despite this high toxin concentration. For control larvae reared on diet  
215 without Cry1Ac, mean survival to third instar was 96% (range: 91-100%, mean n = 99 larvae per  
216 bioassay in five bioassays). Susceptible, resistant, and control larvae were transferred  
217 individually to plastic cups containing non-Bt diet, reared to fifth instar, transferred individually  
218 to 1.5 ml plastic tubes, and frozen at -80°C for subsequent genomic comparison.

219

## 220 **Genomic comparison of GA-R and LAB-S**

221 We sequenced pools of larvae from the parental strains GA-R and LAB-S, which allowed us to  
222 evaluate genetic variation between and within these parental strains. This also allowed us to  
223 check if SNPs associated with resistance in the GWAS of GA-RS were more common in GA-R,  
224 and if those associated with susceptibility were more common in LAB-S. In April 2019, we  
225 collected 30 third instars from each strain, extracted DNA using Qiagen DNeasy Blood and  
226 Tissue Kits (Qiagen, Hilden, Germany), and constructed Illumina libraries using KAPA LTP  
227 Library Preparation Kits (Roche, Basel, Switzerland). We sequenced both libraries on an  
228 Illumina HiSeq4000 at Novogene (Beijing, China). We called variants with Platypus after read  
229 trimming and alignment to the genome using Trimmomatic and bwa-mem as described above.  
230 To detect potential selective sweeps in each strain, we used SAMtools mpileup (Li 2011) and  
231 PoPoolation (Kofler *et al.* 2011) to calculate Tajima's D in 50-kb windows overlapping by 10 kb  
232 across the genome.

233

## 234 **Genome-wide association study for Cry1Ac resistance**

235 From the heterogeneous strain GA-RS F12 larvae phenotyped in July 2019, we extracted DNA  
236 from 144 resistant and 144 susceptible larvae using ZYMO *Quick-DNA* 96 Plus Kits and  
237 quantified the DNA concentration of each individual using a Nanodrop (Thermo Fisher  
238 Scientific, Waltham, MA, USA). We combined equal amounts of DNA from each of the 144  
239 resistant larvae to make a resistant pool and from each of the 144 susceptible larvae to make a  
240 susceptible pool, then generated libraries using KAPA LTP Library Preparation Kits for each

241 pool. We sequenced both libraries on an Illumina HiSeq4000 at Novogene (Beijing, China).  
242 We demultiplexed reads and trimmed for adapter contamination and low-quality sequence using  
243 Trimmomatic (Bolger *et al.* 2014). We mapped reads to the *de novo* *H. zea* genome using bwa-  
244 mem (Li and Durbin 2009). We used Platypus (Rimmer *et al.* 2014) to call and quantify SNP  
245 variants and short INDELS. We extracted biallelic SNPs with a minimum coverage of 20 in each  
246 pool and a total coverage between 60 and 500 from the Platypus output for statistical analysis,  
247 for which we used two approaches (Benowitz *et al.* 2019). First, we calculated a Z-statistic  
248 (Huang *et al.* 2012), using the formula  $Z = \frac{\rho_1 - \rho_2}{\sqrt{(\rho_0(1-\rho_0)(\frac{1}{n} + \frac{1}{c_1} + \frac{1}{c_2})}}$ , where  $\rho_1$  and  $\rho_2$  are the reference  
249 alleles frequencies of each bulk,  $\rho_0$  is the mean allele frequency across bulks,  $n$  is the sample size  
250 of each bulk, and  $c_1$  and  $c_2$  are the read depth of each bulk. We evaluated statistical significance  
251 of Z against the standard normal distribution. Following convention (Barsh *et al.* 2012, Welter *et*  
252 *al.* 2014), we used  $P < 5 \times 10^{-8}$  as a threshold for significance. To estimate the density of  
253 significant sites, we used the R package WindowScanR  
254 (<https://github.com/tavareshugo/WindowScanR>) to calculate the percentage of SNPs with a more  
255 liberal threshold of  $P < 10^{-5}$  in 10-kb windows overlapping by 5 kb. Density of significant sites  
256 may be a particularly useful parameter because the magnitude of each individual  $P$ -value from a  
257 bulk segregant analysis is highly sensitive to noise. Close linkage to the causal allele, however,  
258 should result in a higher density of significant sites even if the  $P$ -value itself varies. Second, we  
259 performed a sliding-window analysis with 500-kb windows overlapping by 250 kb using the R  
260 package QTLseqr (Mansfeld and Grumet 2018), which implements the  $G'$  method of Magwene  
261 *et al.* (2011). This method provides a statistical determination of whether an entire QTL, rather  
262 than an individual SNP, is significant, and also defines borders to QTLs deemed significant.

263

### 264 **Fine-scale mapping within chromosome 13**

265 Using larvae from the F22 and F23 generation (July 2020), we conducted fine-scale mapping  
266 within the QTL in chromosome 13 associated with resistance, which we refer to hereafter as the  
267 *rI* locus. Using the methods described above, larvae were scored as resistant or susceptible.

268 After phenotyping, we reared susceptible larvae to fifth instars on untreated diet before storing  
269 all larvae (62 resistant and 51 susceptible) at  $-80^{\circ}\text{C}$ . We extracted DNA from each sample using  
270 Qiagen DNeasy Blood and Tissue Kits and genotyped each larva individually via high-resolution  
271 melt curve (HRM) analysis at 12 SNP marker sites within the chromosome 13 QTL  
272 (Supplementary Table S2). For each site, we performed PCR in 10  $\mu\text{l}$  reactions using Apex Taq  
273 DNA polymerase and EvaGreen Dye (Biotium, Fremont, CA, USA) as the intercalating dye. We  
274 ran RT-PCR in a QuantStudio 3 Real-Time PCR machine (Thermo Fisher) using continuous  
275 capture with a  $0.025^{\circ}\text{C}/\text{s}$  ramp. We used QuantStudio Design and Analysis Software (Thermo  
276 Fisher) to manually score melt curves for the identity of the focal SNP. We compared test melt  
277 curves against control curves generated from the parental LAB-S and GA-R strains. We used  
278 Fisher's exact test to assess significant differences between allele frequencies of resistant and  
279 susceptible individuals.

280 The lack of amplification from some individuals for some markers yielded variation in sample  
281 size among the 12 markers. These ranged from 40 to 60 for resistant larvae (mean = 56) and 20  
282 to 50 (mean = 45) for susceptible larvae. We also used HRM to obtain genotypes at marker #4  
283 for 23 of 25 resistant larvae and 89 of 95 control larvae tested from the F26 generation. The  
284 control larvae were not screened with a bioassay and thus contained a mixture of resistant and  
285 susceptible individuals.

286 To confirm the accuracy of HRM genotyping, we Sanger sequenced a single site (marker 4;  
287 Supplementary Table S2) for all 60 resistant and a subset of 34 susceptible individuals. We  
288 designed new primers to produce a longer amplicon, and confirmed the quality of the resultant  
289 amplicons with gel electrophoresis. We cleaned the PCR product with Exonuclease I and  
290 Antarctic Phosphatase (New England BioLabs, Ipswich, MA, USA) before sending to Eurofins  
291 Genomics (Louisville, KY, USA) for Sanger sequencing.

292 In addition to the fine mapping data from the HRM, we used the data on significant SNP density  
293 from the original GWAS experiment as well as the Tajima's D results from comparison of the  
294 GA-R and LAB-S strains to provide additional support for narrowing the region associated with  
295 resistance within chromosome 13.

296

## 297 **Inheritance and trajectory of resistance in GA-RS**

298 We performed several analyses of genotype frequencies at marker 4 to understand how *rI* affects  
299 resistance. We used the genotypes from the RNA-seq study (see below) as a control group to  
300 examine the frequency of marker 4 in the GA-RS strain at the F26 generation. We also used a  $\chi^2$   
301 test to examine departure from Hardy-Weinberg equilibrium.

302 We used Fisher's exact test to determine if resistant individuals from GA-RS were more likely to  
303 be homozygous for alleles from GA-R (GG) than heterozygous with one allele from GA-R and  
304 the other from LAB-S (GL) by comparing the frequencies of each genotype in the resistant  
305 samples from generations F22, F23, and F26 to the control samples from generation F26. We  
306 calculated the dominance parameter *h*, which varies from 0 for recessively inherited resistance to  
307 1 for dominantly inherited resistance (Liu and Tabashnik 1997), using the genotype frequencies  
308 at marker 4 in the F22, F23, and F26 for resistant, control, and susceptible larvae (Supplementary  
309 Table S3). The results from F22 and F23 were similar and were pooled to increase the sample  
310 size for analyses.

311 To evaluate the relationship between genotype and resistance, we compared their trajectories  
312 across generations in GA-RS. We used linear regressions in R 4.1.0 to test the null hypothesis of  
313 no change in the log<sub>10</sub> of percentage survival to third instar. Bioassays used 1 or 10  $\mu\text{g}$  of Cry1Ac  
314 per cm<sup>2</sup> in generations F2, F22 and F23, and only the higher concentration in the F26 test.

315

## 316 **RNA-seq and candidate gene analysis**

317 To generate samples for RNA sequencing, we reared LAB-S, GA-R, and GA-RS (generation 26)  
318 individuals on untreated diet as described above in October 2020. When the larvae of the  
319 parental strains LAB-S and GA-R reached the third instar, we dissected midguts from 15  
320 individuals and froze them in groups of five, generating three biological replicates per strain. For  
321 the GA-RS heterogeneous strain, we dissected 95 third instar midguts and froze them

322 individually, while simultaneously freezing the remainder of the carcass separately in wells of a  
323 PCR plate. We extracted DNA from each sample using a squish extraction (Gloor *et al.* 1993)  
324 using 50  $\mu$ l of buffer. We screened samples HRM as above at marker 4, which was one of two  
325 sites we found to be most strongly associated with resistance. We selected 15 individuals that  
326 were homozygous for the LAB-S genotype at this site (henceforth “LL”) and 15 individuals  
327 homozygous for the GA-R genotype at this site (henceforth “GG”) and pooled the midguts  
328 corresponding to these samples into groups of five, again generating three biological replicates  
329 for each genotype. Selecting genotypes in this way allowed us to isolate the effects that the  
330 chromosome 13 QTL has on gene expression, giving us the potential to detect *trans*-regulatory  
331 effects. We extracted RNA from all 12 midgut samples using ZYMO Direct-zol RNA Miniprep  
332 Kit kits and built paired-end libraries with KAPA stranded mRNA seq kits. Libraries were  
333 sequenced in part on an Illumina NextSeq at the University of Arizona Genetics Core (UAGC;  
334 Tucson, AZ, USA) and part on an Illumina NovaSeq at Novogene.

335 We trimmed reads using Trimmomatic (Bolger *et al.* 2014) and aligned them to our *H. zea*  
336 assembly with Hisat2 (Kim *et al.* 2019). We built genome-guided transcriptome assemblies for  
337 each sample using StringTie (Pertea *et al.* 2016) and used StringTie merge to create a single  
338 transcriptome. We used blastp to identify the closest ortholog in *H. armigera* for each gene. We  
339 quantified read abundance for each sample using Salmon (Patro *et al.* 2017) and combined its  
340 transcript-level counts into gene-level counts with the R package tximport (Soneson *et al.* 2016).  
341 We analyzed differential expression using FDR-corrected *P*-values from negative binomial  
342 models at the gene level with edgeR (Robinson *et al.* 2010), after filtering and normalization for  
343 library-size differences. We performed statistical comparisons of LAB-S to GA-R and LL to GG.  
344 We performed a one-tailed (to account for directionality of gene expression differences)  $\chi^2$  test to  
345 examine whether the overlap of differentially expressed (DE) genes was more than expected by  
346 chance.

347 In addition to analyzing global differential expression, we used the RNA-seq data to better  
348 understand gene structure and expression within the candidate QTL. For each sample, we used  
349 Trinity (Haas *et al.* 2013) to construct *de novo* transcriptome assemblies for each sample. Using  
350 tblastn, we identified the transcripts in each Trinity assembly corresponding to all StringTie  
351 transcripts from the region from bp 4,370,000 – 4,620,000. We then took the longest transcript

352 from each Trinity assembly and used orfipy (Singh and Wurtele 2021) to extract the longest open  
353 reading frame (ORF) for each gene. Next we compared the ORFs from each of the 12 samples,  
354 looking for differences in predicted protein structure between the samples with resistant  
355 chromosome 13 genotypes (GA-R and GG) and susceptible ones (LAB-S and LL). We  
356 quantified midgut abundance of transcripts for all genes expressed in this region with average log  
357 count per million reads across all samples produced by edgeR. We used PROVEAN (Choi and  
358 Chan 2015) to predict the effects of amino acid substitutions between LAB-S and GA-R for each  
359 of the genes in this region.

360 After identifying a nonsense mutation in the *kinesin-12* gene, we manually inspected this site in  
361 IGV (Robinson *et al.* 2017). After performing Sanger sequencing of the GA strain and field  
362 samples (see below), we additionally inspected this site by visualizing sequencing  
363 chromatograms in Teal (Rausch *et al.* 2020). We analyzed the putative kinesin-12 protein  
364 computationally using blastp to find homologous proteins. We then used blastp to compare the  
365 sequence conservation upstream and downstream of the stop codon mutation in the lepidopteran  
366 species *H. armigera* (XP\_021193241.1), *Chloridea virescens* (PCG76683.1), *Spodoptera litura*  
367 (XP\_022828947.1), *Manduca sexta* (KAG6448083.1), and *Bombyx mori* (XP\_004927959). We  
368 used a two-tailed paired t-test to assess amino acid conservation across these species before and  
369 after the nonsense mutation. We aligned these sequences with both the GA-R and LAB-S *H. zea*  
370 sequences with Clustal Omega (Sievers and Higgins 2018) and plotted the alignments using  
371 TeXshade (Beitz 2000). To further probe the potential structure and function of the protein, we  
372 used InterProScan 5 (Jones *et al.* 2014) to search for additional protein domains, AlphaFold 2.1.0  
373 (Jumper *et al.* 2021) to predict the 3D protein structure, SignalP 5.0 (Armenteros *et al.* 2019) to  
374 examine if the protein contained signal peptides, and DeepGOPlus (Kulmanov and Hoehndorf  
375 2020) to predict gene ontology (GO; Ashburner *et al.* 2000) categorization based on the  
376 sequence.

377

### 378 **Genotyping of the GA strain and field samples for the *kinesin-12* mutation**

379 We collected *H. zea* larvae from the field in Maricopa, Arizona in October 2020 and Tifton,

380 Georgia in July 2021. Both populations had high resistance to Cry1Ac (Yu *et al.* 2021; Y.  
381 Carrière, unpubl. data). We reared larvae to adults in the lab and collected tissue from 25 of the  
382 Maricopa samples and 39 of the Tifton samples. We extracted DNA using a squish extraction  
383 (Gloor *et al.* 1993) in 150  $\mu$ l of buffer. We analyzed five F72 GA individuals sequenced in  
384 October 2016 (Fritz *et al.* 2020). We downloaded raw reads from NCBI (PRJNA599999),  
385 trimmed them using Trimmomatic, aligned them to the GA-R genome with bwa-mem, and  
386 identified the frequency of the C546T mutation with samtools and VarScan. We additionally  
387 collected tissue from 20 F87 adults from the GA strain in May 2018 and extracted DNA with  
388 Qiagen DNeasy Blood and Tissue Kits. We designed primers (Supplementary Table S2) to  
389 amplify the region surrounding the *kinesin-12* mutation causing a stop codon. We performed  
390 PCR as above, although with the addition of final concentration 0.1  $\mu$ g/ $\mu$ l bovine serum albumin  
391 (Sigma-Aldrich, St. Louis, MO, USA) due to PCR inhibitors. Sanger sequencing was done at  
392 Eurofins Genomics as described above. We screened sequences manually in Geneious Prime  
393 (Biomatters, Auckland, NZ) for presence of the target mutation.

394

### 395 **Analysis of 11 genes previously implicated in lepidopteran resistance to Cry1Ac**

396 We used our results from GWAS and RNA-seq to test the hypothesis that one or more of 11  
397 genes previously implicated in lepidopteran resistance to Cry1Ac contributed to resistance in our  
398 strains. For each gene, we present the lowest *P*-value from the original GWAS of SNPs between  
399 the start and end of the gene in the *G'* analysis. We also report the FDR corrected *P*-values from  
400 differential expression analyses in edgeR comparing GA-R versus LAB-S and within GA-RS  
401 comparing individuals with both alleles from GA-R (GG) versus those with both alleles from  
402 LAB-S (LL).

403

## 404 **Results**

### 405 **Chromosome-level assembly of the genome of resistant strain GA-R of *H. zea***

406 We generated a *de novo* chromosome-level assembly of the genome of the GA-R strain of *H. zea*  
407 with 31 chromosomes, 375.2 Mb, 36.9% GC content, 33.0% repeat content, an N50 scaffold  
408 length of 12.9 Mb, and 15,482 encoded proteins (Supplementary Table S4). Of 5,286 conserved  
409 single-copy lepidopteran genes, this genome has 98.9% complete, 98.5% complete and single-  
410 copy, 0.4% duplicated, 0.3% fragmented, and only 0.8% missing. The new genome assembly has  
411 only one gap set to 100 bp, which occurs in chromosome 17 and represents 0.000027% of the  
412 genome. This is a considerable improvement from the *H. zea* assembly of Pearce *et al.* (2017),  
413 which has 34.1 Mb of gaps representing 10% of that genome (Supplementary Table S4). Relative  
414 to the previous *H. zea* genome assembly, the new assembly has 64-fold greater N50, 10% more  
415 base pairs, 15% more complete BUSCO genes, and double the repeat content (Supplementary  
416 Table S4). Relative to previous estimates based on bacterial artificial chromosome sequencing  
417 and flow cytometry, the new genome size is 3% larger than an estimate for *H. zea* (Coates *et al.*  
418 2017) and 5% smaller than an estimate for *H. armigera* (Zhang *et al.* 2019b).

419 The 31 chromosomes in the new assembly are largely syntenic with those of *H. armigera* (Pearce  
420 *et al.* 2017; Valencia-Montoya *et al.* 2020), although with different inversion karyotypes for 19  
421 chromosomes (Supplementary Figure S1). We also found substantial differences between *H. zea*  
422 and *H. armigera* in the Z chromosome (chromosome 1) that are not associated with reversed  
423 sequences and thus probably not caused by chromosomal inversions (Supplementary Figure S1).  
424 An alternative hypothesis is that errors in one or both assemblies contributed to these differences.  
425 Errors are less likely in the new *H. zea* assembly because of its higher N50 and lower gap  
426 percentage relative to the *H. armigera* assembly (Supplementary Table S4, Pearce *et al.* 2017).  
427 In particular, the Z chromosome assembled cleanly without additional merging in the new *H. zea*  
428 assembly.

429

### 430 **Genomic comparison between GA-R and the susceptible strain LAB-S**

431 Sequencing of 30 larvae from GA-R and 30 larvae from the unrelated susceptible strain LAB-S  
432 revealed 165,416 fixed differences between the strains, as well 941,146 variable sites in GA-R  
433 and 911,946 in LAB-S. Analysis of Tajima's D showed many regions with low genetic variation  
434 throughout the genome in both strains (Supplementary Figures S2 and S3). For both strains,



435 these regions could reflect genetic drift or selective sweeps caused by adaptation to lab  
436 conditions. For GA-R, regions of low variation could also reflect selection for resistance in the  
437 lab.

438

### 439 **Genome-Wide Association Study (GWAS) of resistance to Cry1Ac in GA-RS**

440 We created the GA-RS strain by crossing GA-R and LAB-S. Both the Z-score and  $G'$  sliding  
441 window analyses of 1,578,733 SNPs from the GWAS using pools of resistant and susceptible  
442 larvae from the F12 generation of GA-RS identified a region associated with resistance on  
443 chromosome 13 (Figure 1, Supplementary Figure S4).  $G'$  analysis via QTLseqr defined this QTL  
444 as a region from 4.0 to 6.5 Mb. This QTL contains 117 SNPs associated with resistance at  $P < 5$   
445  $\times 10^{-8}$ . All of these 117 SNPs showed the expected relationship with the parental strain. The 108  
446 alleles found at higher frequency in the resistant larvae were more common in GA-R than LAB-  
447 S. The remaining nine alleles were at higher frequency in the susceptible larvae and were more  
448 common in LAB-S than GA-R.

449 Outside of this QTL, only 18 SNPs were associated with resistance at  $P < 5 \times 10^{-8}$ . Both  
450 chromosome 10 and 15 had two of these SNPs. No other chromosome had more than one. In the  
451  $G'$  analysis, only the QTL on chromosome 13 was significantly associated with resistance  
452 (Supplementary Figure S4). We refer to this QTL as the *rI* locus.

453 Analysis of Z-scores from the GWAS shows that SNP sites that differed significantly between  
454 resistant and susceptible larvae were not evenly distributed across the chromosome 13 QTL  
455 (Figure 2A). Eighteen of the 25 windows of 10 kb with the top 5% significant SNP density were  
456 clustered between 4.42 and 4.60 Mb. Consistent with the GWAS results, Tajima's D provides  
457 evidence for a selective sweep in GA-R between 4.3 and 5.2 Mb on chromosome 13 (Figure 2B).

458

### 459 **Fine-scale mapping within the *rI* locus**

460 We used HRM to genotype individual resistant and susceptible larvae from the F22 and F23 of

461 GA-RS for SNPs at 12 marker sites within *r1*. This revealed eight markers (2 to 9) from 4.3 to  
462 5.0 Mb significantly associated with resistance (Table 1). For marker 4 at 4.5 Mb (n = 57) and  
463 marker 5 at 4.6 Mb (n = 60), all resistant larvae genotyped from GA-RS were either homozygous  
464 for the allele from the resistant GA-R strain (GG) or heterozygous, with one allele from GA-R  
465 and the other from the susceptible LAB-S strain (GL) (Table 1). These results were confirmed  
466 via Sanger sequencing for all 60 resistant individuals and 34 susceptible individuals. A similar  
467 test using only resistant larvae from the F26 confirmed this result: all 23 resistant larvae  
468 genotyped were either GG (16) or GL (7). By contrast, the three genotypes were in Hardy-  
469 Weinberg equilibrium in 89 larvae genotyped from a control sample from the F26 that was not  
470 screened for resistance and thus contained a mixture of resistant and susceptible individuals (24  
471 GG: 44 GL: 21 LL,  $\chi^2 = 0.0091$ ;  $P = 0.52$ ). Genotype frequency in the F26 larvae differed  
472 significantly between the resistant larvae and the control larvae ( $\chi^2 = 22.60$ ,  $P = 1.2 \times 10^{-5}$ ).

473 The results from the GWAS, Tajima's D, the G' analysis, analysis of SNP density, and fine-scale  
474 mapping (Figures 1 and 2, Table 2), identify the region between 4.3 to 4.6 Mb as most likely to  
475 contain the mutation(s) causing the effect of chromosome 13 on resistance to Cry1Ac. This  
476 region is captured by a single contig in both our Canu and DBG2OLC assemblies  
477 (Supplementary Figure S5) and is syntenic with a region of the *H. armigera* chromosome 13  
478 (Supplementary Figures S1 and S6).

479

#### 480 **Gene expression in the midgut and a stop codon in *r1***

481 Based on the results above and annotations from funannotate and StringTie, we focused on the  
482 10 genes between 4.37 and 4.62 Mb on chromosome 13. Six of these 10 genes were expressed  
483 substantially in the midgut of third instar larvae (Figure 3A, Table 2). The most highly expressed  
484 gene encodes a wild-type protein of 308 amino acids that has sequence identity of 97% with  
485 *kinesin-related protein 12* in *H. armigera* (XP\_021193241; Supplementary Figure S7,  
486 Supplementary Table S5). The structure of this gene in terms of introns and exons is also similar  
487 between *H. zea* and *H. armigera* (Supplementary Figure S6B). Hereafter, we refer to this gene in  
488 *H. zea* as *kinesin-12*.

489 In GA-R we found a point mutation (C546T) in *kinesin-12* that introduces a premature stop  
490 codon expected to truncate the protein at 183 amino acids (Figure 3B, Supplementary Figure S7).  
491 Manual inspection of aligned genomic reads, RNA-seq reads, and Sanger sequences further  
492 confirmed the identity of the SNP (Supplementary Figures S7, S8 and S9). This mutation  
493 occurred in 100% of reads covering the SNP from 30 GA-R larvae and in 0% of reads covering  
494 the SNP from 30 LAB-S larvae that were sequenced in the genomic comparison between these  
495 strains. In the GWAS with GA-RS, this mutation was more common in resistant larvae (71%)  
496 than susceptible larvae (32%;  $P = 7.48 \times 10^{-6}$ ). It occurs at bp 4,547,246, between the two  
497 markers (4 and 5) most tightly associated with resistance to Cry1Ac (Table 1). Furthermore,  
498 RNA-seq near marker 4 detected the C546T mutation in 100% of reads covering the SNP from  
499 15 GG larvae and 0% of reads covering the SNP from 15 LL larvae, confirming complete  
500 linkage between this mutation and marker 4. All of this evidence identifies the C546T mutation  
501 in *kinesin-12* as a candidate for causing the contribution of the *r1* allele to resistance to Cry1Ac.

502 Aside from the *kinesin-12* mutation, we detected missense mutations between GA-R and LAB-S  
503 linked to marker 4 in three of the other six candidate genes in this region that were expressed  
504 substantially in midguts of third instar larvae. These genes encode juvenile hormone esterase,  
505 phosphatidylinositol 4-phosphate 3-kinase, and ubiquitin protein ligase (Table 2). However,  
506 according to PROVEAN, none of the amino acid substitutions in these genes are expected to  
507 have major effects on protein function.

508 Although the *kinesin-12* gene has been annotated as encoding a kinesin-related protein in *H.*  
509 *armigera*, both its wild-type function and the effects of the nonsense mutation remain unclear.  
510 Within the moth family Noctuidae, amino acid sequence identities relative to the LAB-S strain of  
511 *H. zea* are 97% for *H. armigera* (as noted above), 87% for *C. virescens*, and 61% for *S. litura*  
512 (Supplementary Table S5). Outside this family, no annotated proteins in Lepidoptera have  
513 greater than 45% amino acid identity and we found no orthologs in other insect orders. For five  
514 species of Lepidoptera, including the three mentioned above plus *B. mori* and *M. sexta*, the  
515 sequence identity for this protein relative to LAB-S did not differ significantly between upstream  
516 and downstream from the stop codon ( $t_4 = 0.95$ ,  $P = 0.40$ ; Supplementary Table S5). Thus, we  
517 cannot reject the null hypothesis that evolutionary constraints are similar for the portions of the  
518 protein before and after the stop codon.

519 Analysis with SignalP found no evidence for a signal peptide, indicating this protein is not likely  
520 to be integrated into or secreted through the cell membrane. The most specific of the GO terms  
521 associated with this protein by DeepGoPlus (Supplementary Table S6) is intracellular non-  
522 membrane-bounded organelle, which is most closely associated with kinesin-related proteins in  
523 *Drosophila melanogaster* (<http://amigo.geneontology.org/amigo/term/GO:0043232>).  
524 InterProScan and AlphaFold identified a coil with high confidence (aa 124-194; Supplementary  
525 Figures S11 and S12) that would be disrupted in the truncated form of the protein. Thus, we find  
526 moderate evidence the *H. zea kinesin-12* gene encodes a kinesin protein whose function might be  
527 disrupted by the C546T nonsense mutation.

528

### 529 ***Kinesin-12* mutation in the GA strain and in field samples**

530 To test the hypothesis that the C546T mutation in *kinesin-12* originated in the field, we  
531 determined its frequency in the GA strain of *H. zea*, which was selected for resistance in the  
532 field, but not in the lab (Brévault *et al.* 2013; Welch *et al.* 2015). In GA, the frequency of the  
533 C546T mutation was 0.80 in five larvae from the F72 generation (three with homozygous TT  
534 genotypes and two with heterozygous CT genotypes), which does not differ significantly from its  
535 frequency of 0.975 in 20 larvae from the F87 generation (19 homozygous TT and one  
536 heterozygous CT; Fisher's exact test:  $P = 0.10$ ). These results are consistent with the hypothesis  
537 that C546T mutation originated in the field population from which GA was established. The  
538 alternative hypothesis that this mutation was absent in the field and arose in the lab seems  
539 unlikely. Based on the mean of ca. 900 moths per generation for GA and assuming a mutation  
540 rate of  $3 \times 10^{-9}$  per nucleotide site (Keightley *et al.* 2015; Yoder and Tiley 2021), the probability  
541 of a single mutation arising at a particular nucleotide site in GA during 72 generations is 0.0004.

542 The high frequency of C546T in GA after rearing for many generations in the lab without  
543 exposure to Bt toxins implies this mutation caused little or no fitness cost when reared in the lab  
544 in the absence of Bt toxins. However, we did not find this mutation in 39 individuals collected  
545 from the field in Georgia in July 2021 or in 25 individuals derived from the field in Arizona in  
546 2020, despite the resistance to Cry1Ac in both of these field populations (Yu *et al.* 2021; Y.

547 Carrière, unpubl. data). Whereas all individuals from the Georgia 2021 sample had the same  
548 sequence as LAB-S at the codon starting with bp 546, three individuals from Arizona had a  
549 single base pair substitution (C546A) changing the encoded amino acid from glutamine to lysine.  
550 In the field samples from Arizona in 2020 and Georgia in 2021, we detected no insertions,  
551 deletions, or other mutations introducing a stop codon in the 200 bp upstream or downstream  
552 from the C546T mutation.

553

#### 554 **Inheritance and trajectory of resistance in GA-RS**

555 The genotype frequencies at marker 4 in resistant and susceptible larvae indicate at least one  
556 GA-R allele at this locus was necessary for resistance in our screening bioassay at 10  $\mu\text{g}$  Cry1Ac  
557 per  $\text{cm}^2$  diet (Table 1). However, 27% of susceptible larvae were homozygous for the GA-R  
558 allele at marker 4 (Table 1). Together these results suggest that the *rI* allele was necessary but  
559 not sufficient for resistance to Cry1Ac in our screening bioassay.

560 Compared to 89 control larvae reared on untreated diet, 69 resistant larvae from the F22, F23,  
561 and F26 generations had a significantly higher ratio of the GG genotype to the GL genotype for  
562 marker 4 (Fisher's exact test;  $P < 0.0001$ ). Based on the data for marker 4 from the F22, F23, and  
563 F26, the *rI* allele had a value for dominance ( $h$ ) of 0.23 (Supplementary Table S3), which is  
564 intermediate between completely recessive inheritance ( $h = 0$ ) and additive inheritance ( $h = 0.5$ ).

565 To test the hypothesis that alleles at one or more other loci contributed to resistance, we  
566 compared the trajectory of resistance based on bioassay data with the trajectory of the GA-R  
567 allele at marker 4. Resistance to Cry1Ac decreased substantially over time (Figure 4;  
568 Supplementary Table S1), indicating that in the absence of Cry1Ac, a pleiotropic fitness cost was  
569 associated with one or more alleles contributing to resistance. However, the frequency of the  
570 GA-R allele at marker 4 was 0.52 in 89 control larvae from the F26, which is not different than  
571 the expected 0.50 in the F1. This suggests no fitness cost was associated with the *rI* allele, which  
572 is tightly linked with GA-R allele at marker 4. In the F26, marker 4 was in Hardy-Weinberg  
573 equilibrium as noted above, confirming the absence of selection at this locus in GA-RS. The  
574 significant decrease in resistance over time despite no decline in the frequency of the GA-R

575 allele at marker 4 implies the decrease in resistance was caused by reduced frequency of one or  
576 more resistance alleles that carry a fitness cost in the absence of Cry1Ac and are not linked with  
577 the *r1* allele.

578

### 579 **Analysis of gene expression using RNA-seq**

580 To test the hypothesis that differential gene expression contributes to resistance, we used RNA-  
581 seq to compare transcript levels between GA-R and LAB-S and between the GG and LL  
582 genotypes within GA-RS. After filtering, we analyzed expression of 12,965 genes  
583 (Supplementary Table S7). We found 2,173 differentially expressed (DE) genes between the  
584 unrelated strains LAB-S and GA-R (Supplementary Table S8) and 23 DE genes between the GG  
585 and LL genotypes within GA-RS (Supplementary Table S9). None of the genes associated with  
586 *r1* in chromosome 13 differed significantly in expression between GA-R and LAB-S or between  
587 GG and LL.

588 Twelve of the 23 DE genes between GG and LL were also among the set of 2,173 DE genes in  
589 the parental strain comparison, of which nine were DE in the same direction in both comparisons  
590 (higher expression in GA-R than LAB-S and in GG than LL or vice versa; Tables S6 and S7).  
591 The overlap in DE genes between these two datasets is significantly greater than expected by  
592 chance ( $\chi^2 = 3.86$ ;  $P = 0.025$ ), implying the within-strain comparison between GG and LL  
593 reflects meaningful differences between the parental strains. However, none of the 23 DE genes  
594 between GG and LL (Supplementary Table S9) are among the 11 genes previously implicated in  
595 resistance to Cry1Ac in lepidopterans (Table 3). One gene significantly downregulated in both  
596 GA-R and GG is on chromosome 1 and encodes a sodium/potassium/calcium  
597 exchanger (Supplementary Tables S8 and S9). This transmembrane protein has some functional  
598 similarities to ABC transporters and could be a candidate as a Bt receptor. However, expression  
599 was reduced only 2.6-fold in GG versus LL and 2.5-fold in GA-R versus LAB-S. Together these  
600 results indicate the *r1* region exerts a *trans*-regulatory effect on gene expression, but the current  
601 data provide no compelling evidence that any difference in expression influences resistance.

602

## 603 **Analysis of 11 genes previously implicated in lepidopteran resistance to Cry1Ac**

604 We used our results from GWAS and RNA-seq to evaluate potential contributions to resistance  
605 of 11 genes previously implicated in lepidopteran resistance to Cry1Ac (Table 3). None of these  
606 candidate genes are in the resistance-associated QTL on chromosome 13 or the putative minor  
607 effect QTL on chromosome 10 (Table 3). In addition, none of them had any SNPs that were  
608 significantly associated with resistance in the GWAS (Table 3). Although *tetraspanin-1* is on  
609 chromosome 10 in *H. zea*, it is outside the regions of this chromosome that were moderately  
610 associated with resistance in the GWAS. As noted above, none of the 23 DE genes between GG  
611 and LL are among the 11 candidate genes (Supplementary Table S9). Only one of the 11  
612 pairwise comparisons between strains based on RNA-seq showed a significant difference.  
613 Expression of *ABCC1* was significantly lower in GA-R than LAB-S ( $P = 0.0014$ , Table 3; Table  
614 S6). However, within GA-RS, expression of *ABCC1* did not differ significantly between GG and  
615 LL ( $P = 0.29$ ; Table 3), which indicates reduced expression of *ABCC1* was not genetically linked  
616 with resistance conferred by *r1*.

617

## 618 **Discussion**

619 We report three key results demonstrating a novel genetic basis of Cry1Ac resistance in the GA-  
620 R strain of *H. zea*, which resulted from field selection followed by lab selection (Brévault *et al.*  
621 2013; Welch *et al.* 2015). First, resistance was associated with a 250-kb region of chromosome  
622 13 that contains no genes with a previously identified role in Bt resistance or toxicity. Second,  
623 within this region, resistance to Cry1Ac was associated with a point mutation that introduces a  
624 premature stop codon in a novel candidate gene, *kinesin-12*. Third, we report evidence that one  
625 or more other loci also contributed to resistance to Cry1Ac. To facilitate these advances, we built  
626 the first chromosome-level genome assembly for *H. zea*, adding to a growing set of highly  
627 contiguous genomes for lepidopteran pests (Chen *et al.* 2019b; Ward *et al.* 2021; Yan *et al.*  
628 2021). This genome was essential for the genetic mapping reported here and will serve as a  
629 resource for other genomic investigations into the biology of *H. zea*.

630 Our findings add a new candidate gene to the diverse list of genes associated with Bt resistance

631 in lepidopterans (Jin *et al.* 2018; Guo *et al.* 2021; Jurat-Fuentes *et al.* 2021). However, the novel  
632 genetic basis of resistance does not necessarily imply a novel biochemical mechanism of  
633 resistance. The effects of *rI* could be mediated by either decreased toxin activation or reduced  
634 binding of Cry1Ac to larval midgut membranes, which are well known mechanisms of Bt  
635 resistance (Peterson *et al.* 2017; Jurat-Fuentes *et al.* 2021). Indeed, previous studies of *H. zea*  
636 have found decreased protoxin activation in GA-R (Zhang *et al.* 2019) and reduced binding of  
637 Cry1Ac to larval midgut preparations in strains with resistance caused by knocking out the  
638 putative receptor ABCC2 (Perera *et al.* 2021).

639 The location of *rI* on chromosome 13 is noteworthy because it corresponds closely to the region  
640 under the strongest selection in *H. zea* populations from Louisiana that were exposed to Bt crops  
641 over the past 19 years (Taylor *et al.* 2021). Although Taylor *et al.* (2021) identified a narrow  
642 region near but not containing *rI* as the most likely site of selection (~4.0 Mb in our assembly),  
643 the broader region associated with the selective sweep in their data includes *rI* (~3.8 to 5.8 Mb)  
644 and aligns with both our original and refined QTL for resistance. Thus, *rI* might be associated  
645 with resistance to Cry1Ab (which is similar to Cry1Ac) in the field populations of *H. zea* from  
646 Louisiana studied by Taylor *et al.* (2021), as well as in GA-R and its parent strain GA (Fritz *et*  
647 *al.* 2020), which originated from a field-selected population in Georgia in 2008 (Brévault *et al.*  
648 2013).

649 The RNA-seq evidence does not support the hypothesis that altered transcription in the *rI* region  
650 causes resistance. Thus, a protein-coding mutation is more likely to be responsible for the  
651 contribution of the *rI* region to resistance. We hypothesize that this contribution is mediated by  
652 the premature stop codon in the *kinesin-12* gene. Among the protein-coding mutations in the  
653 candidate region, only this nonsense mutation that shortens the predicted protein by 40% is  
654 expected to have a major effect on protein function. Furthermore, of the 10 genes in the region  
655 tightly associated with resistance, midgut expression was highest for *kinesin-12*, suggesting a  
656 midgut function for the protein it encodes. Protein functional prediction algorithms including  
657 DeepGoPlus provide moderate support for the original annotation as a kinesin with a function in  
658 intracellular transport or structure. Nonetheless, we do not know the normal function of the  
659 kinesin-12 protein and cannot infer that the C546T mutation causes resistance. In future work,  
660 we aim to test the hypothesis that the C546T mutation contributes to resistance by determining if



661 resistance is reduced when we use CRISPR/Cas9 to replace the mutant sequence in GA-R with  
662 the wild type sequence from LAB-S (Jin *et al.* 2018; Fabrick *et al.* 2021). If disruption of the  
663 *kinesin-12* gene is not sufficient for resistance, as the results here imply, we expect that knocking  
664 out this gene would not cause resistance in a susceptible strain.

665 Kinesins and kinesin-related proteins are motor proteins important in microtubule function,  
666 chromosomal movement, and organelle transport (Ali and Wang 2020) that have not been  
667 associated previously with Bt resistance. Several kinesins are involved in mitogen-activated  
668 protein kinase (MAPK) signaling cascades (Liang and Yang 2019) and MAPK signaling is  
669 implicated in Bt resistance (Guo *et al.* 2015, 2020, 2021; Qin *et al.* 2021). Furthermore, a case of  
670 xenobiotic resistance in mice involved a mutant kinesin acting downstream of a MAPK (Watters  
671 *et al.* 2001). Thus, one hypothesis is that *kinesin-12* acts downstream of MAPK as part of the  
672 signaling cascade initiated when Cry1Ac binds to a midgut receptor. However, MAPK  
673 influences Bt resistance via downregulation of Bt receptors (Guo *et al.* 2015, 2020, 2021; Qin *et al.*  
674 *et al.* 2021). Here we see no evidence for reduced transcription of putative receptors, making this  
675 an unlikely explanation for the link between *kinesin-12* and resistance.

676 Kinesins also play a role in the localization of transmembrane proteins to the cell membrane  
677 (Jana *et al.* 2021) and in intracellular cadherin trafficking (Phang *et al.* 2014). The transport  
678 functions of kinesins and kinesin-related proteins entail motor complexes of three or more  
679 proteins (Phang *et al.* 2014), suggesting interactions between different proteins could be  
680 interrupted to interfere with receptor transport to the membrane. We hypothesize that in the GA-  
681 R strain of *H. zea*, a truncated *kinesin-12* in combination with mutations affecting one or more of  
682 its interacting partners blocks proper localization of a Bt receptor on the membrane.

683 The results from GWAS and fine-scale mapping show the *r1* allele was necessary, but not  
684 sufficient for resistance in our screening bioassay, implying contributions from one or more  
685 additional loci. If a second unlinked mutation were also necessary for resistance in our screening  
686 bioassay, this would be expected to yield a second major peak in the GWAS, similar to the peak  
687 for the QTL in chromosome 13. The lack of a second major peak suggests that mutations in two  
688 or more unlinked loci could each cause resistance in combination with *r1* (e.g., *r1* plus mutation  
689 *X* or *r1* plus mutation *Y* could cause resistance).

690 The decline in resistance over time in GA-RS also implies more than one locus contributed to  
691 resistance. While resistance to Cry1Ac declined significantly across generations in GA-RS, the  
692 frequency of C546T and other *rI* linked alleles did not. After 22, 23 and 26 generations without  
693 exposure to Bt toxins, it was not lower than its expected initial frequency of 0.50. Thus, the  
694 decline in resistance reflects a decreased resistance allele frequency at one or more other loci.  
695 Unlike the C546T mutation, which did not have a substantial fitness cost in the lab, the observed  
696 decline in resistance suggests that a fitness cost was associated with at least one mutation at  
697 another locus that contributed to resistance in GA-RS. Polygenic resistance to Cry1Ac or  
698 Cry1Ab also has been reported in strains of *H. zea* unrelated to GA-R (Caccia *et al.* 2012;  
699 Lawrie *et al.* 2020; Perera *et al.* 2021; Taylor *et al.* 2021) and in other species of Lepidoptera  
700 (Kaur and Dilwari 2010; Zhao *et al.* 2021; Ma *et al.* 2022).

701 The results summarized above have implications for understanding the trajectory of the C546T  
702 mutation in the field. The high frequency of the C546T mutation in the field-selected GA strain  
703 that was started with 180 field-collected larvae suggests this mutation was common in 2008 in  
704 the moderately resistant field population in Georgia from which GA was derived (Brévault *et al.*  
705 2013). In the absence of exposure to Cry1Ac, the frequency of this mutation did not increase  
706 significantly in GA from the F72 to F87 or in GA-RS from the expected frequency in the F1 to  
707 the observed frequency in the F26. Thus, because GA was not exposed to Cry1Ac in the lab, it is  
708 unlikely the frequency of this mutation was low initially in GA and subsequently increased  
709 because of strong selection. Nonetheless, we did not detect this mutation in Cry1Ac-resistant  
710 populations from the same site in Georgia in 2021 or in Arizona in 2020. Thus, this mutation is  
711 not associated with resistance to Cry1Ac in all field populations of *H. zea*. Also, its frequency  
712 apparently decreased in the field in Georgia from 2008 to 2021. One hypothesis is that the  
713 frequency of this mutation decreased in Georgia because it has a substantial fitness cost under  
714 field conditions, such as reduced overwintering survival (Carrière *et al.* 2001), which would not  
715 be evident in the lab. The C546T mutation could have been replaced by one or more mutations  
716 that have lower fitness costs (Guillemaud *et al.* 1998), confer higher resistance to Cry1Ac, and/or  
717 confer resistance without contributions from mutations at other loci. More research is needed to  
718 determine the function of kinesin-12 and its role in resistance, as well as the genetic basis of  
719 Cry1Ac resistance in current field populations of *H. zea*.

720

## 721 **Data and code availability**

722 All raw sequence data is available at NCBI (Bioproject: PRJNA767434). Phenotypic data, HRM  
723 and Sanger genotyping data, initial and final genome assemblies, genome annotations, and  
724 scripts for analyses and figures are all available via OSF. Supplementary materials are available  
725 at figshare.

726

## 727 **Acknowledgments**

728 Mention of trade names or commercial products in this article is solely for the purpose of  
729 providing specific information and does not imply recommendation or endorsement by the U.S.  
730 Department of Agriculture. USDA is an equal opportunity provider and employer. We thank  
731 Xinzhi Ni for sending *H. zea* from Georgia; Alex Yelich and Chandran Unnithan for help with  
732 insect rearing and dissections; Yidong Wu, David Heckel, Megan Fritz, Katherine Taylor, Fred  
733 Gould, and Juan Luis Jurat-Fuentes for their valuable comments on the manuscript; and Jon  
734 Galina-Mehlman, Jayson Talag, and Dave Kudrna for their assistance and advice regarding  
735 PacBio and Illumina sequencing.

736

## 737 **Author contributions**

738 J.F., Y.C., B.E.T., and L.M.M. conceived and designed the project. K.M.B., C.W.A., B.A.D.,  
739 and X.L. performed experiments and collected the data. K.M.B., C.W.A., Y.C., and B.E.T.  
740 analyzed data. K.M.B. and B.E.T. wrote the manuscript with input from all authors.

741

## 742 **Funding**

743 This work was supported by grants from the USDA National Institute of Food and Agriculture  
744 (Agriculture and Food Research Initiative 2020-67013-31924 and Biotechnology Risk

745 Assessment Research Grants Program 2020-33522-32268), Corteva Agriscience, and the Cotton  
746 Insect Resistance Management (IRM) Technical Subcommittee of the Agricultural  
747 Biotechnology Stewardship Technical Committee (ABSTC).

748

## 749 **Conflicts of interest**

750 As noted above, support for this study was provided in part by Corteva Agriscience and the  
751 Cotton IRM Technical Subcommittee of the ABSTC.

752

753

## 754 **Literature cited**

755 Ali MI, Luttrell RG, Young III SY. 2006. Susceptibilities of *Helicoverpa zea* and *Heliothis*  
756 *virescens* (Lepidoptera: Noctuidae) populations to Cry1Ac insecticidal protein. J Econ  
757 Entomol. 99:164-175.

758 Ali I, Yang W-C. 2020. The functions of kinesin and kinesin-related proteins in eukaryotes. Cell  
759 Adh Migr. 14: 139-152.

760 Anilkumar KJ, Rodrigo-Simón A, Ferré J, Pusztai-Carey M, Sivasupramaniam S, *et al.* 2008.  
761 Production and characterization <sup>[11]</sup><sub>SEP</sub> of *Bacillus thuringiensis* Cry1Ac-resistant cotton  
762 bollworm *Helicoverpa zea* (Boddie). Appl Environ Microbiol. 74:462–469.

763 Armenteros JJA, Tsirigos KD, Sønderby CK, Peterson TN, Winther O, *et al.* 2019. SignalP 5.0  
764 improves signal peptide predictions using deep neural networks. Nat Biotech. 37:420-  
765 423.

766 Ashburner M, Ball CA, Blake JA, Botstein D, Butler H, *et al.* 2000. GeneOntology: tool for the  
767 unification of biology. Nat Genet. 25:25-29.

768 Barsh GS, Copenhaver GP, Gibson G, Williams SM. 2012. Guidelines for genome-wide  
769 association studies. PLoS Genet. 8:e1002812.

770 Baxter SW, Badenes-Pérez FR, Morrison A, Vogel H, Crickmore N, *et al.* Parallel evolution of

- 771 *Bacillus thuringiensis* toxin resistance in Lepidoptera. *Genetics*. 189:675-679.
- 772 Beitz E. 2000. TeXshade: shading and labeling of multiple sequence alignments using LaTeX2e.  
773 *Bioinformatics*. 16:135-139.
- 774 Benowitz KM, Coleman JM, Matzkin LM. 2019. Assessing the architecture of *Drosophila*  
775 *mojavensis* locomotor evolution with bulk segregant analysis. *G3 (Bethesda)*. 9:1767-  
776 1775.
- 777 Bolger AM, Lohse M, Usadel B. 2014. Trimmomatic: a flexible trimmer for Illumina sequence  
778 data. *Bioinformatics*. 30:2114-2120.
- 779 Bravo A, Likitvivanavong S, Gill SS, Soberón M. 2011. *Bacillus thuringiensis*: a story of a  
780 successful bioinsecticide. *Ins Biochem Mol Biol*. 41:423-431.
- 781 Brévault T, Heuberger S, Zhang M, Ellers-Kirk C, Ni X, *et al.* 2013. Potential shortfall of  
782 pyramided transgenic cotton for insect resistance management. *Proc Natl Acad Sci USA*.  
783 110:5806-5811.
- 784 Brévault T, Tabashnik BE, Carrière Y. 2015. A seed mixture increases dominance of resistance  
785 to Bt cotton in *Helicoverpa zea*. *Sci Rep*. 5:9807.
- 786 Caccia S, Moar WJ, Chandrashekhar J, Oppert C, Anilkumar KJ, *et al.* 2012. Association of  
787 Cry1Ac toxin resistance in *Helicoverpa zea* (Boddie) with increased alkaline phosphatase  
788 levels in the midgut lumen. *Appl Env Microbiol*. 78:5690-5698.
- 789 Calles-Torrez V, Knodel JJ, Boetel MA, French BW, Fuller BW, *et al.* 2019. Field-evolved  
790 resistance of northern and western corn rootworm (Coleoptera: Chrysomelidae)  
791 populations to corn hybrids expressing single and pyramided Cry3Bb1 and Cry34/35Ab1  
792 Bt proteins in North Dakota. *J Econ Entomol*. 112:1875-1886.
- 793 Carrière Y, Ellers-Kirk C, Patin AL, Sims M, Meyer S, *et al.* 2001. Overwintering cost  
794 associated with resistance to transgenic cotton in the pink bollworm. *J. Econ. Entomol*.  
795 94:935-941.
- 796 Carrière Y, Crickmore N, Tabashnik BE. 2015. Optimizing pyramided transgenic Bt crops for  
797 sustainable pest management. *Nat Biotechnol*. 33:161-168.
- 798 Carrière Y, Degain BA, Unnithan GC, Harpold VS, Heuberger S, Li X, *et al.* 2018. Effects of  
799 seasonal changes in cotton plants on the evolution of resistance to pyramided cotton  
800 producing the Bt toxins Cry1Ac and Cry1F in *Helicoverpa zea*. *Pest Man Sci*. 74:627-  
801 637.

- 802 Carrière Y, Degain B, Unnithan GC, Harpold VS, Li X, *et al.* 2019. Seasonal declines in Cry1Ac  
803 and Cry2Ab concentration in maturing cotton favor faster evolution of resistance to  
804 pyramided Bt cotton in *Helicoverpa zea*. J Econ Entomol. 112:2907–2914.
- 805 Carrière, Y, Brown Z, Aglasan S, Dutilleul P, Carroll M, *et al.* 2020a. Crop rotation mitigates  
806 impacts of corn rootworm resistance to transgenic Bt corn. Proc Natl Acad Sci USA.  
807 117:18385-18392.
- 808 Carrière Y, Degain BA, Harpold VS, Unnithan GC, Tabashnik BE. 2020b. Gene flow between  
809 Bt and non-Bt plants in a seed mixture increases dominance of resistance to pyramided Bt  
810 corn in *Helicoverpa zea* (Lepidoptera: Noctuidae). J Econ Entomol. 113:2041–2051.
- 811 Carrière Y, Degain BA, Tabashnik BE. 2021. Effects of gene flow between Bt and non-Bt plants  
812 in a seed mixture of Cry1A.105 + Cry2Ab corn on performance of corn earworm in  
813 Arizona. Pest Manag Sci. 77: 2106–2113
- 814 Chakraborty M, Baldwin-Brown JG, Long AD, Emerson JJ. 2016. Contiguous and accurate de  
815 novo assembly of metazoan genomes with modest long read coverage. Nuc Ac Res. 44:  
816 e147.
- 817 Chen L, Wei J, Liu C, Niu L, Zhang C, *et al.* 2019a. Effect of midgut specific binding protein  
818 ABCC1 on Cry1Ac toxicity against *Helicoverpa armigera*. Sci Ag Sin. 52:3337-3345.
- 819 Chen W, Yang X, Tetreau G, Song X, Coutu C, *et al.* 2019b. A high-quality chromosome-level  
820 genome assembly of a generalist herbivore, *Trichoplusia ni*. Mole Ecol Res. 19:485-496.
- 821 Chin CS, Alexander DH, Marks P, Klammer AA, Drake J, *et al.* 2013. Nonhybrid, finished  
822 microbial genome assemblies from long-read SMRT sequencing data. Nat Methods.  
823 10:563-569.
- 824 Choi Y, Chan AP. 2015. PROVEAN web server: a tool to predict the functional effect of amino  
825 acid substitutions and indels. Bioinformatics. 31: 2745-2747.
- 826 Coates BS, Abel CA, Perera OP. 2017. Estimation of long terminal repeat element content in the  
827 *Helicoverpa zea* genome from high-throughput sequencing of bacterial artificial  
828 chromosome pools. Genome. 60:310-324.
- 829 Cook DR, Threet M. 2019. Cotton insect losses – 2019.  
830 <https://www.entomology.msstate.edu/resources/2019loss.php>
- 831 Dively GP, Venugopal PD, Bean D, Whalen J, Holmstrom K, *et al.* 2018. Regional pest  
832 suppression associated with widespread Bt maize adoption benefits vegetable growers.

- 833 Proc Natl Acad Sci USA. 115:3320–3325.
- 834 Fabrick JA, LeRoy DM, Mathew LG, Wu Y, Unnithan GC, *et al.* 2021. CRISPR-mediated  
835 mutations in the ABC transporter gene ABCA2 confer pink bollworm resistance to Bt  
836 toxin Cry2Ab. *Sci Rep.* 11:10377.
- 837 Ferguson KB, Kursch-Metz T, Verhulst EC, Pannebakker BA. 2020. Hybrid genome assembly  
838 and evidence-based annotation of the gg parasitoid and biological control agent  
839 *Trichogramma brassicae*. *G3 (Bethesda)*. 10:3533-3540.
- 840 Flynn JM, Hubley R, Goubert C, Rosen J, Clark AG, *et al.* 2020. RepeatModeler2 for automated  
841 genomic discovery of transposable element families. *Proc Natl Acad Sci USA* 117:9451-  
842 9457.
- 843 Fritz ML, Nunziata SO, Guo R, Tabashnik BE, Carrière Y. 2020. Mutations in a novel cadherin  
844 gene associated with Bt resistance in *Helicoverpa zea*. *G3 (Bethesda)*. 10:1563-1574.
- 845 Gahan LJ, Gould F, Heckel DG. 2001. Identification of a gene associated with Bt resistance in  
846 *Heliothis virescens*. *Science* 293:857-860.
- 847 Gloor GB, Preston CR, Johnson-Schlitz DM, Nassif NA, Phillis RW, *et al.* 1993. Type I  
848 repressors of *P* element mobility. *Genetics*. 135:81-95.
- 849 Guillemaud T, Lenormand T, Bourguet D, Chevillon C, Pasteur N, *et al.* 1998. Evolution of  
850 resistance in *Culex pipiens*: allele replacement and changing environment. *Evolution*.  
851 52:443-453.
- 852 Guo Z, Kang S, Chen D, Wu Q, Wang S, *et al.* 2015. MAPK signaling pathway alters expression  
853 of midgut ALP and ABCC genes and causes resistance to *Bacillus thuringiensis* Cry1Ac  
854 toxin in diamondback moth. *PLoS Genetics*. 11:e1005124.
- 855 Guo Z, Kang S, Sun D, Gong L, Zhou J, *et al.* 2020. MAPK-dependent hormonal signaling  
856 plasticity contributes to overcoming *Bacillus thuringiensis* toxin action in an insect host.  
857 *Nat Commun*. 11:3003.
- 858 Guo Z, Kang S, Wu Q, Wang S, Crickmore N, *et al.* 2021. The regulation landscape of MAPK  
859 signaling cascade for thwarting *Bacillus thuringiensis* infection in an insect host. *PLoS*  
860 *Path.* 17:e1009917.
- 861 Haas BJ, Papanicolau A, Yassour M, Grabherr M, Blood PD, *et al.* 2013. *De novo* transcript  
862 sequence reconstruction from RNA-seq using the Trinity platform for reference  
863 generation and analysis. *Nat Prot.* 8:1494-1512.

- 864 Hartke J, Schell T, Jongepier E, Schmidt H, Sprenger PP, *et al.* 2019. Hybrid genome assembly  
865 of a neotropical mutualistic ant. *Genom Biol Evol.* 11:2306-2311.
- 866 Heckel DG, Gahan LJ, Baxter SW, Zhao J-Z, Shelton AM, *et al.* 2007. The diversity of Bt  
867 resistance genes in species of Lepidoptera. *J Inv Biol.* 95:192-197.
- 868 ISAAA. 2019. Global status of commercialized biotech/GM crops: 2019. ISAAA Brief No. 55.  
869 ISAA: Ithaca, NY.
- 870 Jaworski CC, Allan CW, Matzkin LM. 2020. Chromosome-level hybrid de novo genome  
871 assemblies as an attainable option for nonmodel insects. *Mol Ecol Res.* 20:1277-1293.
- 872 Jin L, Wei Y, Zhang L, Yang Y, Tabashnik BE, *et al.* 2013. Dominant resistance to Bt cotton  
873 and minor cross-resistance to Bt toxin in Cry2Ab in cotton bollworm from China. *Evol*  
874 *Appl.* 6:1222-1235.
- 875 Jin L, Wang F, Guan J, Zhang S, Yu S, Liu Y *et al.* 2018. Dominant point mutation in a  
876 tetraspanin gene associated with field-evolved resistance of cotton bollworm to  
877 transgenic Bt cotton. *Proc Natl Acad Sci USA.* 115:11760-11765.
- 878 Jones P, Binns D, Chang HY, Fraser M, Li W, *et al.* 2014. InterProScan 5: genome-scale protein  
879 function classification. *Bioinformatics.* 30:1236-1240.
- 880 Jumper J, Evans R, Pritzel A, Green T, Figurnov M, *et al.* 2021. Highly accurate protein  
881 structure prediction with AlphaFold. *Nature.* 596:583-589.
- 882 Jurat-Fuentes JL, Karumbaiah L, Jakka SRK, Ning C, Liu C, *et al.* 2011. Reduced levels of  
883 membrane-bound alkaline phosphatase are common to lepidopteran strains resistant to  
884 Cry toxins from *Bacillus thuringiensis*. *PLoS One.* 6:e17606.
- 885 Jurat-Fuentes JL, Heckel DG, Ferré J. 2021. Mechanisms of resistance to insecticidal proteins  
886 from *Bacillus thuringiensis*. *Annu Rev Entomol.* 66:121-140.
- 887 Kajitani R, Toshimoto K, Noguchi H, Toyoda A, Ogura Y, *et al.* 2014. Efficient *de novo*  
888 assembly of highly heterozygous genomes from whole-genome shotgun short reads.  
889 *Genom Res.* 24:1384-1395.
- 890 Karsch-Mizrachi I, Nakamura Y, Cochrane G. 2012. The International Nucleotide Sequence  
891 Database Collaboration. *Nuc Ac Res.* 40:D33-D37.
- 892 Kaur P, Dilwari VK. 2011. Inheritance of resistance to *Bacillus thuringiensis* Cry1Ac toxin in  
893 *Helicoverpa armigera* (Hübner) (Lepidoptera: Noctuidae) from India. *Pest Man Sci.*  
894 67:1294-1302.



- 895 Kaur G, Guo J, Brown S, Head GP, Price PA, *et al.* 2019. Field-evolved resistance of  
896 *Helicoverpa zea* (Boddie) to transgenic maize expressing pyramided Cry1A.105.Cry2Ab2  
897 proteins in northeast Louisiana, the United States. *J Inv Pathol.* 163:11-20.
- 898 Keightley PD, Pinharanda A, Ness RW, Simpson F, Dasmahapatra KK *et al.* 2015. Estimation of  
899 the spontaneous mutation rate in *Heliconius melpomene*. *Mol Biol Evol.* 32:239-243.
- 900 Kim D, Paggi JM, Park C, Bennett C, Salzberg SL. 2019. Graph-based genome alignment and  
901 genotyping with HISAT2 and HISAT-genotype. *Nat Biotech.* 37:907-915.
- 902 Kofler R, Orozco-terWengel P, De Maio N, Pandey RV, Nolte V, *et al.* 2011. PoPoolation: a  
903 toolbox for population genetic analysis of next generation sequencing data from pooled  
904 individuals. *PLoS One.* 6:e15925.
- 905 Koren S, Walenz BP, Berlin K, Miller JR, Bergman NH, *et al.* 2017. Canu: scalable and accurate  
906 long-read assembly via adaptive k-mer weighting and repeat separation. *Genom Res.*  
907 27:722-736.
- 908 Kulmanov M, Hoehndorf R. 2020. DeepGOPlus: improved protein function prediction from  
909 sequence. *Bioinformatics.* 36:422-429.
- 910 Langmead B, Salzberg S. 2012. Fast gapped-read alignment with Bowtie 2. *Nat Methods.* 9:357-  
911 359.
- 912 Lawrie RD, Mitchell III RD, Deguenon JM, Ponnusamy L, Reisig D, *et al.* 2020. Multiple  
913 known mechanisms and a possible role of an enhanced immune system in Bt-resistance  
914 in a field population of the bollworm, *Helicoverpa zea*: differences in gene expression  
915 with RNAseq. *Int J Mol Sci.* 21:6528.
- 916 Lawrie RD, Mitchell III RD, Deguenon JM, Ponnusamy L, Reisig D, *et al.* 2022.  
917 Characterization of long non-coding RNAs in the bollworm, *Helicoverpa zea*, and their  
918 possible role in Cry1Ac-resistance. *Insects.* 13:12.
- 919 Li H. 2011. A statistical framework for SNP calling, mutation discovery, association mapping  
920 and population genetical parameter estimation from sequencing data. *Bioinformatics.*  
921 27:2987-2993.
- 922 Li H, Durbin R. 2009. Fast and accurate short read alignment with Burrows-Wheeler transform.  
923 *Bioinformatics.* 25:1754-1760.
- 924 Liang Y-J, Yang W-X. 2019. Kinesins in MAPK cascade: how kinesin motors are involved in  
925 the MAPK pathway? *Gene.* 684:1-9.

- 926 Liu Y, Tabashnik BE. 1997. Inheritance of resistance to the *Bacillus thuringiensis* toxin Cry1C  
927 in the diamondback moth. *Appl Env Microbiol.* 63:2218-2223.
- 928 Liu C, Xiao Y, Li X, Oppert B, Tabashnik BE, *et al.* 2014. *Cis*-mediated down-regulation of a  
929 trypsin gene associated with Bt resistance in cotton bollworm. *Sci Rep.* 4:7219.
- 930 Luttrell RG, Wan L, Knighten K. 1999. Variation in susceptibility of Noctuid (Lepidoptera)  
931 larvae attacking cotton and soybean to purified endotoxin proteins and commercial  
932 formulations of *Bacillus thuringiensis*. *J Econ Entomol.* 92:21-32.
- 933 Ma W, Zhao X, Yin C, Jian F, Du X, *et al.* 2020. A chromosome-level genome assembly reveals  
934 the genetic basis of cold tolerance in a notorious rice insect pest, *Chilo suppressalis*. *Mol*  
935 *Ecol Res.* 20:268-282.
- 936 Ma X, Shao E, Chen W, Cotto-Rivera RO, Yang X, *et al.* 2022. Bt Cry1Ac resistance in  
937 *Trichoplusia ni* is conferred by multi-gene mutations. *Insect Biochem Mol Biol.*  
938 140:103678.
- 939 Magwene PM, Willis JH, Kelly JK. 2011. The statistics of bulk segregant analysis using next  
940 generation sequencing. *PLoS Comp Biol.* 7:e1002255.
- 941 Mansfeld BN, Grumet R. 2018. QTLseqr: an R package for bulk segregant analysis with next-  
942 generation sequencing. *Plant Genom.* 11:180006.
- 943 Marçais G, Delcher AL, Phillippy AM, Coston R, Salzberg SL, *et al.* 2018. MUMmer4: a fast  
944 and versatile genome alignment system. *PLoS Comp Biol.* 14:e1005944.
- 945 Mathers TC. 2020. Improved genome assembly and annotation of the soybean aphid (*Aphis*  
946 *glycines* Matsumura). *G3 (Bethesda).* 10: 899-906.
- 947 Musser FR, Catchot AL, Conley SP, Davis JA, DiFonzo C, *et al.* 2019. 2018 Soybean insect  
948 losses in the United States. *Midsouth Entomol.* 12: 1-24.
- 949 National Academies of Sciences, Engineering, and Medicine. 2016. *Genetically Engineered*  
950 *Crops: Experiences and Prospects.* Washington DC, National Academies Press.
- 951 Orpet RJ, Degain BA, Unnithan GC, Welch KL, Tabashnik BE, *et al.* 2015a. Effects of dietary  
952 protein to carbohydrate ratio on Bt toxicity and fitness costs of resistance in *Helicoverpa*  
953 *zea*. *Entomol Exp Appl.* 156:28-36.
- 954 Orpet RJ, Degain BA, Tabashnik BE, Carrière Y. 2015b. Balancing Bt toxin avoidance and  
955 nutrient intake by *Helicoverpa zea* (Lepidoptera: Noctuidae) larvae. *J Econ Entomol.*  
956 108:2581-2588.

- 957 Palmer JN, Stajich J. 2020. Funannotate v1.8.1: Eukaryotic genome annotation (v1.8.1). Zenodo.  
958 <https://doi.org/10.5281/zenodo.4054262>.
- 959 Patro R, Duggal G, Love MI, Irizarry RA, Kingsford C. 2017. Salmon provides fast and bias-  
960 aware quantification of transcript expression. *Nat Meth.* 14:417-419.
- 961 Pearce SL, Clarke DF, East PD, Elfekih S, Gordon KHJ, *et al.* 2017. Genomic innovations,  
962 transcriptional plasticity and gene loss underlying the evolution and divergence of two  
963 highly polyphagous and invasive *Helicoverpa* pest species. *BMC Biol.* 15:63.
- 964 Perera OP, Little NS, Abdelgaffar H, Jurat-Fuentes JL, Reddy GVP. 2021. Genetic knockouts  
965 indicate that the ABCC2 protein in the bollworm *Helicoverpa zea* is not a major receptor  
966 for the Cry1Ac insecticidal protein. *Genes.* 12:1522.
- 967 Pertea M, Pertea GM, Antonescu CM, Chang TC, Mendell JT, *et al.* 2015. StringTie enables  
968 improved reconstruction of a transcriptome from RNA-seq reads. *Nat Biotech.* 33:290-  
969 295.
- 970 Peterson B, Bezuidenhout CC, Van den Berg J. 2017. An overview of mechanisms of Cry toxin  
971 resistance in lepidopteran insects. *J Econ Entomol.* 110:362-377.
- 972 Qin J, Guo L, Ye F, Kang S, Sun D, *et al.* 2021. MAPK-activated transcription factor PxJun  
973 suppresses *PcABC1* expression and confers resistance to *Bacillus thuringiensis* Cry1Ac  
974 toxin in *Plutella xylostella* (L.). *Appl Env Microbiol.* 87:13.
- 975 Rajagopal R, Arora N, Sivakumar S, Rao NGV, Nimbalkar SA, *et al.* 2009. Resistance of  
976 *Helicoverpa armigera* to Cry1Ac toxin from *Bacillus thuringiensis* is due to improper  
977 processing of the protoxin. *Biochem J.* 419:309-316.
- 978 Rausch T, Fritz MH-Y, Untergasser A, Benes V. 2020. Tracy: basecalling, alignment, assembly  
979 and deconvolution of sanger chromatogram trace files. *BMC Genom.* 21:230.
- 980 Reisig DD, Huseh AS, Bacheler JS, Aghaee M-A, Braswell L, *et al.* 2018. Long-term and  
981 observational evidence of practical *Helicoverpa zea* resistance to cotton with pyramided  
982 Bt toxins. *J Econ Entomol.* 111:1824-1833.
- 983 Reisig DD, DiFonzo C, Dively G, Fargan Y, Gore F, *et al.* 2021. Best management practices to  
984 delay the evolution of Bt resistance in Lepidopteran pests without high susceptibility to  
985 Bt toxins in North America. *J Econ Entomol.* <https://doi.org/10.1093/jee/toab247>.
- 986 Rimmer A, Phan H, Mathieson I, Iqbal Z, Twigg SRF, *et al.* 2014. Integrating mapping-,  
987 assembly-, and haplotype-based approaches for calling variants in clinical sequencing

- 988 applications. *Nat Genet.* 46:912-918.
- 989 Roach MJ, Schmidt SA, Borneman AR. 2018. Purge Haplotigs: allelic contig reassignment for  
990 third-gen diploid genome assemblies. *BMC Bioinf.* 19:460.
- 991 Robinson MD, McCarthy DJ, Smythe GK. 2010. edgeR: a Bioconductor package for differential  
992 expression analysis of digital gene expression. *Bioinformatics.* 26:139-140.
- 993 Robinson JT, Thorvaldsdóttir H, Wenger AM, Zehir A, Mesirov JP. 2017. Variant review with  
994 the Integrative Genomics Viewer. *Cancer Res.* 77:31-34.
- 995 Romeis J, Naranjo SE, Meissle M, Shelton AM. 2018. Genetically engineered crops help support  
996 conservation biological control. *Biol Contr.* 130:136–154.
- 997 Schmidt H, Hellmann SL, Waldvogel A-M, Feldmeyer B, Hankeln T, *et al.* 2020. A high-quality  
998 genome assembly from short and long reads for the non-biting midge *Chironomus*  
999 *riparius* (Diptera). *G3 (Bethesda).* 10:1151-1157.
- 1000 Seppey M, Manni M, Zdobnov EM. 2019. BUSCO: assessing genome assembly and annotation  
1001 completeness. In: Kollmar M (ed.) *Gene Prediction. Methods in Molecular Biology*, vol  
1002 1962. Humana, New York, NY. pp. 227-245.
- 1003 Shen W, Le S, Li Y, Hu F. 2016. SeqKit: a cross-platform and ultrafast toolkit for FASTA/Q  
1004 manipulation. *PLoS One.* 11:e0163962.
- 1005 Sievers F Higgins DG. 2018. Clustal Omega for making accurate alignments of many protein  
1006 sequences. *Prot Sci.* 27:135-145.
- 1007 Singh U, Wurtele ES. 2021. orfipy: a fasta and flexible tool for extracting ORFs. *Bioinformatics.*  
1008 37:3019-3020.
- 1009 Smit AFA, Hubley R, Green P. 2013-2015. RepeatMasker Open-4.0. <http://repeatmasker.org>
- 1010 Smith JL, Farhan Y, Schaafsma AW. 2019. Practical resistance of *Ostrinia nubilalis*  
1011 (Lepidoptera: Crambidae) to Cry1F *Bacillus thuringiensis* maize discovered in Nova  
1012 Scotia, Canada. *Sci Rep.* 9:18247.
- 1013 Soberón M, Pardo-López L, López I, Gómez I, Tabashnik BE, *et al.* 2007. Engineering modified  
1014 Bt toxins to counter insect resistance. *Science.* 318:1640-1642.
- 1015 Sonesson C, Love MI, Robinson MD. 2016. Differential analyses for RNA-seq: transcript-level  
1016 estimates improve gene-level inferences. *F100Research.* 4:1521.
- 1017 Tabashnik BE and Carrière Y. 2019. Global patterns of resistance to Bt crops highlighting pink  
1018 bollworm in the United States, China, and India. *J Econ Entomol.* 112:2513-2523.

- 1019 Tabashnik BE, Liu Y-B, Malvar T, Heckel DG, Masson L, *et al.* 1998. Insect resistance to  
1020 *Bacillus thuringiensis*: uniform or diverse? *Phil Trans R Soc B.* 353:1751-1756.
- 1021 Tabashnik BE, Gassmann AJ, Crowder DW, Carrière Y. 2008. Insect resistance to Bt crops:  
1022 evidence versus theory. *Nat Biotech.* 26:199-202.
- 1023 Tabashnik BE, Liesner LR, Ellsworth PC, Unnithan GC, Fabrick JA, *et al.* 2021. Genetically  
1024 engineered cotton synergizes eradication of the pink bollworm a century after its invasion  
1025 of the United States. *Proc Natl Acad Sci USA.* 118:e2019115118.
- 1026 Taylor KL, Hamby KA, DeYonke AM, Gould F, Fritz ML. 2021. Genome evolution in an  
1027 agricultural pest following adoption of transgenic crops. *Proc Natl Acad Sci USA.*  
1028 118:e2020853118.
- 1029 U.S. Dept. of Agriculture, Agricultural Marketing Service. Cotton Varieties Planted 2008 Crop.  
1030 [https://apps.ams.usda.gov/Cotton/AnnualCNMarketNewsReports/VarietiesPlanted/2008-](https://apps.ams.usda.gov/Cotton/AnnualCNMarketNewsReports/VarietiesPlanted/2008-VarietiesPlanted.pdf)  
1031 [VarietiesPlanted.pdf](https://apps.ams.usda.gov/Cotton/AnnualCNMarketNewsReports/VarietiesPlanted/2008-VarietiesPlanted.pdf) <https://www.ams.usda.gov/mnreports/cnavar.pdf> (accessed 3  
1032 December 2021).
- 1033 U.S. Dept. of Agriculture, Economic Research Service. 2020. Adoption of Genetically  
1034 Engineered Crops in the U.S. [https://www.ers.usda.gov/data-products/adoption-of-](https://www.ers.usda.gov/data-products/adoption-of-genetically-engineered-crops-in-the-us/)  
1035 [genetically-engineered-crops-in-the-us/](https://www.ers.usda.gov/data-products/adoption-of-genetically-engineered-crops-in-the-us/) (accessed 3 December 2021).
- 1036 Valencia-Montoya WA, Elfekih S, North HL, Meier JI, Warren IA, *et al.* 2020. Adaptive  
1037 introgression across semipermeable species boundaries between local *Helicoverpa zea*  
1038 and invasive *Helicoverpa armigera* moths. *Mol Biol Evol.* 37:2568-2583.
- 1039 Walker BJ, Abeel T, Shea T, Priest M, Abouelliel A, *et al.* 2014. Pilon: an integrated tool for  
1040 comprehensive microbial variant detection and genome assembly improvement. *PLoS*  
1041 *One.* 9:e112963.
- 1042 Wan F, Yin C, Tang R, Chen M, Wu Q, *et al.* 2019. A chromosome-level genome assembly of  
1043 *Cydia pomonella* provides insights into chemical ecology and insecticide resistance. *Nat*  
1044 *Commun.* 10:4237.
- 1045 Wang B, Wei J, Wang Y, Chen L, Liang G. 2020. Polycalin is involved in the toxicity and  
1046 resistance to Cry1Ac toxin in *Helicoverpa zea*. *Arch Ins Biochem Physiol.* 104:e21661.
- 1047 Ward CM, Perry KD, Baker G, Powis K, Heckel DG, *et al.* 2021. A haploid diamondback moth  
1048 (*Plutella xylostella* L.) genome assembly resolves 31 chromosomes and identifies a  
1049 diamide resistance mutation. *Ins Biochem Mol Biol.* 138:103622.

- 1050 Watters JW, Dewar K, Lehoczky J, Boyartchuk V, Dietrich WF. 2001. Kif1C, a kinesin-like  
1051 motor protein, mediates mouse macrophage resistance to anthrax lethal factor. *Curr Biol.*  
1052 11: 1503-1511.
- 1053 Welch KL, Unnithan GC, Degain BA, Wei J, Zhang J, *et al.* 2015. Cross-resistance to toxins  
1054 used in pyramided Bt crops and resistance to Bt sprays in *Helicoverpa zea*. *J Invert*  
1055 *Pathol.* 132:149-156.
- 1056 Welter D, MacArthur J, Morales J, Burdett T, Hall P, *et al.* 2014. The NHGRI GWAS Catalog, a  
1057 curated resource of SNP-trait associations. *Nuc Ac Res.* 42:D1001-D1006.
- 1058 Xu H, Zhao X, Yang Y, Chen X, Mei Y, *et al.* 2021. Chromosome-level genome assembly of an  
1059 agricultural pest, the rice leaffolder *Cnaphalocrocis exigua* (Crambidae, Lepidoptera).  
1060 *Mol Ecol Res.* 21:561-572.
- 1061 Yan B, Ou H, Wei L, Wang X, Yu X, *et al.* 2021. A chromosome-level genome assembly of  
1062 *Ephestia elutella* (Hübner, 1796) (Lepidoptera: Pyralidae). *Genom Biol Evol.*  
1063 13:evab114.
- 1064 Ye C, Ma ZS. 2016. Sparc: a sparsity-based consensus algorithm for long erroneous sequencing  
1065 reads. *PeerJ.* 4:e2016.
- 1066 Ye C, Hill CM, Wu S, Ruan J, Ma ZS. 2016. DBG2OLC: efficient assembly of large genomes  
1067 using long erroneous reads of the third generation sequencing technologies. *Sci Rep.*  
1068 6:31900.
- 1069 Yoder AD, Tiley GP. 2021. The challenge and promise of estimating the de novo mutation rate  
1070 from whole-genome comparisons among closely related individuals. *Mol Ecol.* 30:6087–  
1071 6100.
- 1072 Yu W, Lin S, Dimase M, Niu Y, Brown S, *et al.* 2021. Extended investigation of field-evolved  
1073 resistance of the corn earworm *Helicoverpa zea* (Lepidoptera: Noctuidae) to *Bacillus*  
1074 *thuringiensis* Cry1A.105 and Cry2Ab2 proteins in the southeastern United States. *J Inv*  
1075 *Pathol.* 183: 107560
- 1076 Zhang S, Cheng H, Gao Y, Wang G, Liang G, *et al.* 2009. Mutation of an aminopeptidase N  
1077 gene is associated with *Helicoverpa armigera* resistance to *Bacillus thuringiensis* Cry1Ac  
1078 toxin. *Ins Biochem Mol Biol.* 39:421-429.
- 1079 Zhang M, Wei J, Ni X, Zhang J, Jurat-Fuentes JL, *et al.* 2019a. Decreased Cry1Ac activation by  
1080 midgut proteases associated with Cry1Ac resistance in *Helicoverpa zea*. *Pest Man Sci.*

1081           75:1099-1106.

1082   Zhang S, Gu S, Ni X, Li X. 2019b. Genome size reversely correlates with host plant range in  
1083           *Helicoverpa* species. *Front Physiol.* 10:29.

1084   Zhang S, Shen S, Peng J, Zhou X, Kong X, *et al.* 2020. Chromosome-level genome assembly of  
1085           an important pine defoliator, *Dendrolimus punctatus* (Lepidoptera; Lasiocampidae). *Mol*  
1086           *Ecol Res.* 20:1023-1037.

1087   Zhao S, Jiang D, Wang F, Tabashnik BE, Wu Y. 2021. Independent and synergistic effects of  
1088           knocking out two ABC transporter genes on resistance to *Bacillus thuringiensis* toxins  
1089           Cry1Ac and Cry1Fa in diamondback moth. *Toxins.* 13:9.

1090

1091

1092 **Table 1** Genotype and allele frequencies at 12 markers on the chromosome 13 QTL for resistant  
 1093 and susceptible GA-RS larvae from generations F22 and F23.  
 1094

| Marker | Bp (Chr13) | Resistant larvae                         |                       | Susceptible larvae                       |                       | <i>P-value</i> <sup>b</sup> |
|--------|------------|------------------------------------------|-----------------------|------------------------------------------|-----------------------|-----------------------------|
|        |            | Genotypes<br>(GG / GL / LL) <sup>a</sup> | G allele<br>frequency | Genotypes<br>(GG / GL / LL) <sup>a</sup> | G allele<br>frequency |                             |
| 1      | 4,110,560  | 41 / 15 / 4                              | 0.81                  | 23 / 23 / 3                              | 0.70                  | 1.0                         |
| 2      | 4,281,434  | 30 / 23 / 7                              | 0.69                  | 9 / 24 / 16                              | 0.43                  | 9.6 e-03                    |
| 3      | 4,379,538  | 41 / 18 / 1                              | 0.83                  | 13 / 24 / 12                             | 0.51                  | 2.4 e-04                    |
| 4      | 4,475,706  | 40 / 17 / 0                              | 0.85                  | 13 / 24 / 12                             | 0.51                  | 4.0 e-05                    |
| 5      | 4,596,970  | 43 / 17 / 0                              | 0.86                  | 13 / 24 / 12                             | 0.51                  | 3.0 e-05                    |
| 6      | 4,720,567  | 39 / 17 / 2                              | 0.82                  | 12 / 13 / 12                             | 0.50                  | 1.3 e-04                    |
| 7      | 4,829,519  | 40 / 18 / 1                              | 0.83                  | 13 / 23 / 13                             | 0.50                  | 1.0 e-04                    |
| 8      | 4,902,478  | 38 / 21 / 1                              | 0.81                  | 13 / 23 / 13                             | 0.50                  | 1.0 e-04                    |
| 9      | 4,998,799  | 38 / 19 / 1                              | 0.82                  | 12 / 23 / 14                             | 0.48                  | 5.0 e-05                    |
| 10     | 5,226,319  | 27 / 19 / 3                              | 0.75                  | 14 / 24 / 5                              | 0.61                  | 0.47                        |
| 11     | 5,727,295  | 11 / 22 / 7                              | 0.55                  | 5 / 14 / 1                               | 0.60                  | 0.29                        |
| 12     | 6,232,397  | 15 / 19 / 8                              | 0.58                  | 3 / 33 / 8                               | 0.44                  | 1.0                         |

<sup>a</sup> G indicates the allele was more common in the resistant GA-R strain,

L indicates the allele was more common in the susceptible LAB-S strain.

<sup>b</sup> From Fisher's exact test of the null hypothesis that allele frequency did not differ between the resistant and susceptible larvae.

1095



1096 **Table 2** Larval midgut expression of genes in the region of chromosome 13 QTL associated with  
 1097 resistance to Cry1Ac.  
 1098

| Gene ID     | Start - Stop (orientation) | Name                                                                                      | Larval midgut expression (mean log <sub>2</sub> CPM) |
|-------------|----------------------------|-------------------------------------------------------------------------------------------|------------------------------------------------------|
| MSTRG.8092  | 4,371,598 – 4,491,148 (+)  | <i>Cyclic AMP-response element-binding protein A</i>                                      | 2.44                                                 |
| MSTRG.8095  | 4,491,241 – 4,520,601 (-)  | <i>Heparan-alpha-glucosaminide-N-acetyltransferase</i>                                    | -0.02*                                               |
| MSTRG.8097  | 4,504,492 – 4,507,681 (+)  | <i>Juvenile hormone esterase-like Carboxyl/cholinesterase CCE006D</i>                     | 4.84                                                 |
| hz_G0000107 | 4,536,278 – 4,541,251 (+)  | <i>Lipase member H-B-like</i>                                                             | N/A                                                  |
| MSTRG.8100  | 4,541,250 – 4,593,328 (-)  | <i>Phosphatidylinositol 4-phosphate 3-kinase C2 domain-containing subunit alpha</i>       | 3.25                                                 |
| MSTRG.8101  | 4,546,116 – 4,547,856 (+)  | <i>Kinesin-related protein 12-like</i>                                                    | 7.08                                                 |
| hz_G0000111 | 4,593,482 – 4,595,264 (-)  | Uncharacterized protein                                                                   | N/A                                                  |
| hz_G0000112 | 4,600,520 – 4,606,939 (+)  | Uncharacterized protein                                                                   | N/A                                                  |
| MSTRG.8102  | 4,607,861 – 4,617,975 (-)  | <i>Ubiquitin-protein ligase E3A</i>                                                       | 3.88                                                 |
| MSTRG.8103  | 4,618,419 – 4,620,800 (+)  | <i>Retinal rod rhodopsin-sensitive cGMP 3', 5'-cyclic phosphodiesterase subunit delta</i> | 2.98                                                 |

1099  
 1100 Gene IDs refer to the StringTie annotation when expressed for correspondence with the RNA-  
 1101 seq data. Funannotate IDs refer to non-expressed genes. N/A indicates the gene was not  
 1102 expressed. \*Because of the low expression of this gene (12-fold lower than the median for the  
 1103 other six expressed genes), we considered it not to be substantially expressed.  
 1104

1105 **Table 3** GWAS and RNA-seq results for 11 genes previously implicated in lepidopteran  
 1106 resistance to Cry1Ac.  
 1107

| Gene                | Key reference                    | <i>H. zea</i> genome location <sup>a</sup> | Gene ID <sup>b</sup> | GWAS: <i>P</i> -value <sup>c</sup> | RNA-seq: GA-R vs. LAB-S <i>P</i> -value <sup>d</sup> | RNA-seq: GG vs. LL <i>P</i> -value <sup>d</sup> |
|---------------------|----------------------------------|--------------------------------------------|----------------------|------------------------------------|------------------------------------------------------|-------------------------------------------------|
| <i>ABCC1</i>        | Chen <i>et al.</i> 2019a         | 12: 9.24-9.29                              | 7445                 | 0.16                               | <b>0.0014</b>                                        | 0.29                                            |
| <i>ABCC2</i>        | Baxter <i>et al.</i> 2011        | 15: 7.07-7.09                              | 9800                 | 0.35                               | 0.95                                                 | 0.56                                            |
| <i>APN1</i>         | Zhang <i>et al.</i> 2009         | 9: 11.33-11.37                             | 5943                 | 0.53                               | 0.32                                                 | 0.33                                            |
| <i>Cadherin</i>     | Gahan <i>et al.</i> 2001         | 6: 1.89-1.97                               | 4086                 | 0.46                               | 1.0                                                  | 0.13                                            |
| <i>Cadherin-86C</i> | Fritz <i>et al.</i> 2020         | 12: 4.60-4.62                              | 7702                 | 0.49                               | 0.69                                                 | 0.75                                            |
| <i>MAPK4</i>        | Guo <i>et al.</i> 2015           | 12: 6.80-6.82                              | 9824                 | 0.21                               | 0.12                                                 | 0.43                                            |
| <i>mALP</i>         | Jurat-Fuentes <i>et al.</i> 2011 | 8: 10.41-10.43                             | 4895                 | 0.37                               | 0.11                                                 | 0.62                                            |
| <i>Polycalin</i>    | Wang <i>et al.</i> 2020          | 25: 2.72-2.73                              | 16287                | 0.48                               | 0.73                                                 | 0.14                                            |
| <i>SP2</i>          | Rajagopal <i>et al.</i> 2009     | 7: 1.34-1.35                               | 4260                 | 0.53                               | 0.85                                                 | 0.88                                            |
| <i>Tetraspanin1</i> | Jin <i>et al.</i> 2018           | 10: 11.58-11.59                            | 6160                 | 0.087                              | 0.061                                                | 0.20                                            |
| <i>TryR</i>         | Liu <i>et al.</i> 2014           | 27: 2.04-2.09                              | 17235                | 0.60                               | 0.97                                                 | 1.0                                             |

1108 <sup>a</sup> Chromosome: Mb

1109 <sup>b</sup> Full Gene ID begins with MSTRG.

1110 <sup>c</sup> Lowest *P*-value for any SNP in the gene based on the G' analysis

1111 <sup>d</sup> *P*-values are FDR-corrected, bold indicates significant at < 0.05.

1112

1113

1114

1115

1116 **Figure 1** Manhattan plot of GWAS results showing  $-\log_{10}$  of the  $P$ -values for Z-scores comparing  
1117 allele frequencies between resistant and susceptible larvae. The red line indicates the threshold for  
1118 significant association ( $P = 5e^{-8}$ ).

1119  
1120  
1121 **Figure 2** Association between resistance to Cry1Ac and SNPs within the chromosome 13 QTL.  
1122 (A) Proportion of significant SNPs ( $P < 1e^{-5}$ ) from the Z-score analysis of the QTL data in 10-kb  
1123 sliding windows. The horizontal red line indicates the 95<sup>th</sup> percentile of the distribution. (B)  
1124 Evidence of a selective sweep in GA-R from Tajima's D in 50-kb sliding windows. Blue shading  
1125 covers the QTL from 4.37 to 4.62 Mb. The vertical red bars show the locations of markers 4 and  
1126 5 (Table 1). The red asterisk indicates the location of *kinesin-12*.

1127  
1128  
1129 **Figure 3** Ten genes including *kinesin-12* in the resistance-associated QTL on chromosome 13.  
1130 (A) The four genes at the top are in the (–) orientation, the other six below are in the (+)  
1131 orientation (Table 2). The four genes in white were not expressed substantially in the midgut.  
1132 Darker red indicates higher expression in the midgut (Table 2). (B) The structure of *kinesin-12* in  
1133 LAB-S and GA-R. Boxes represent exons, light blue indicates UTRs, and dark blue signifies  
1134 coding regions.

1135  
1136  
1137 **Figure 4** Survival of the heterogeneous GA-RS strain of *H. zea* tested on diet with 1 (red) or 10  
1138 (blue)  $\mu\text{g}$  Cry1Ac per  $\text{cm}^2$  diet. Survival at each test concentration decreased significantly.  
1139 Regressions of percent survival to third instar on generation:  $y = -2.49x + 88.63$ ,  $R^2 = 0.94$ ,  $df =$   
1140  $2$ ,  $P = 0.021$  and  $y = -0.36x + 11.67$ ,  $R^2 = 0.91$ ,  $df = 3$ ,  $P = 0.0074$  for 1 and 10  $\mu\text{g}$  Cry1Ac per  
1141  $\text{cm}^2$  diet, respectively. Generation 26 was tested only at the higher concentration. Shaded areas  
1142 show 95% confidence intervals.

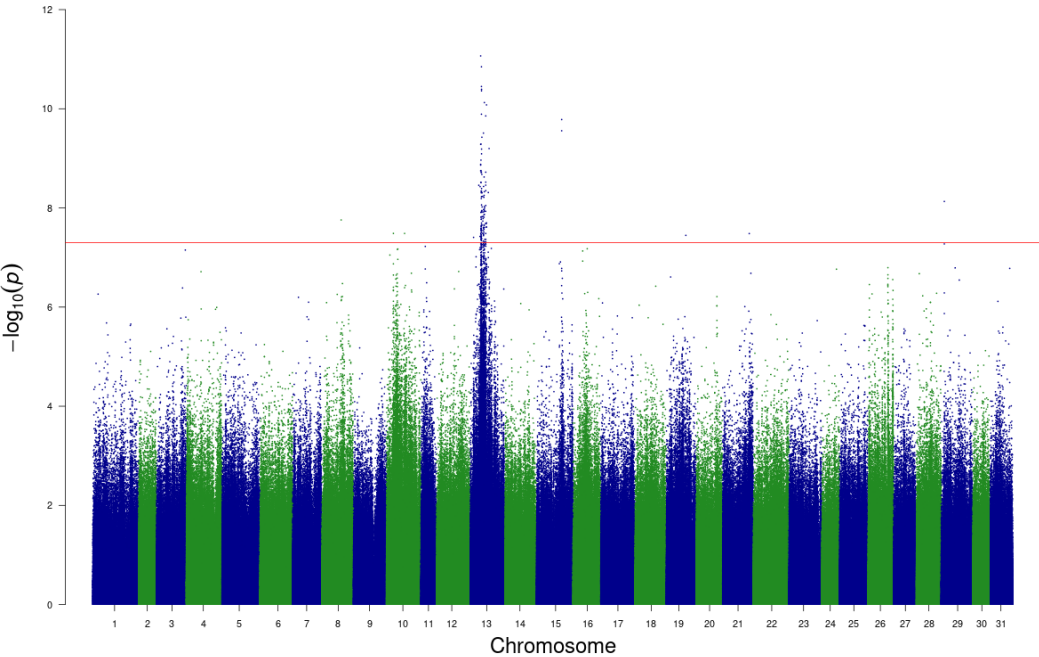

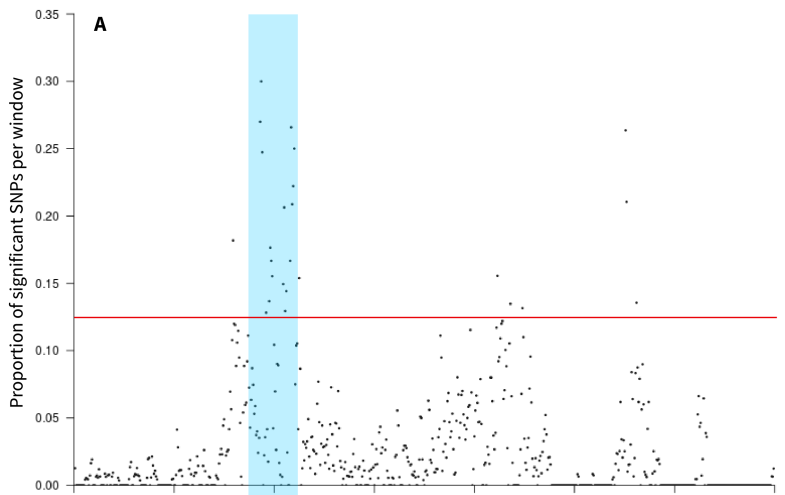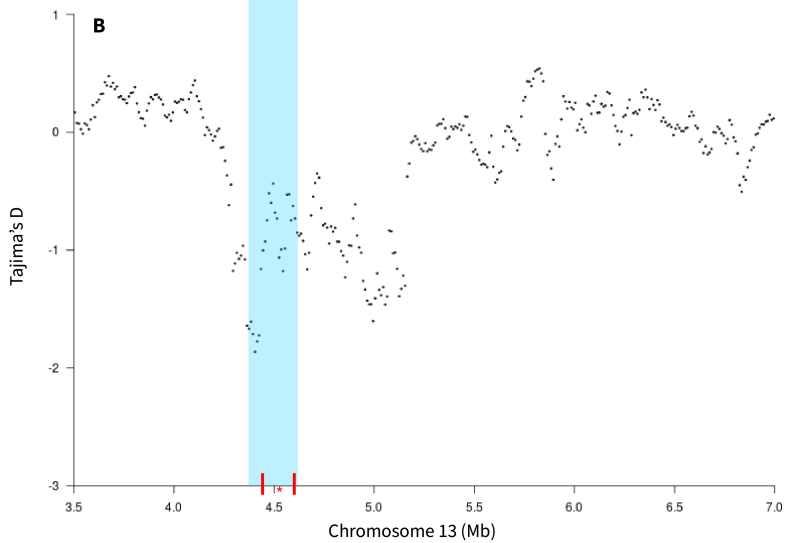

**A**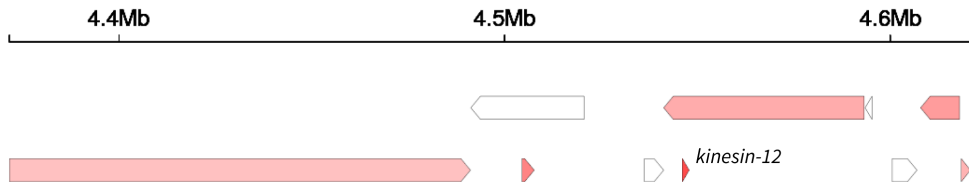**B**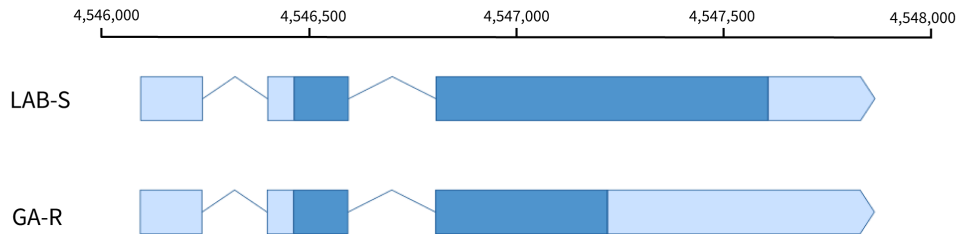

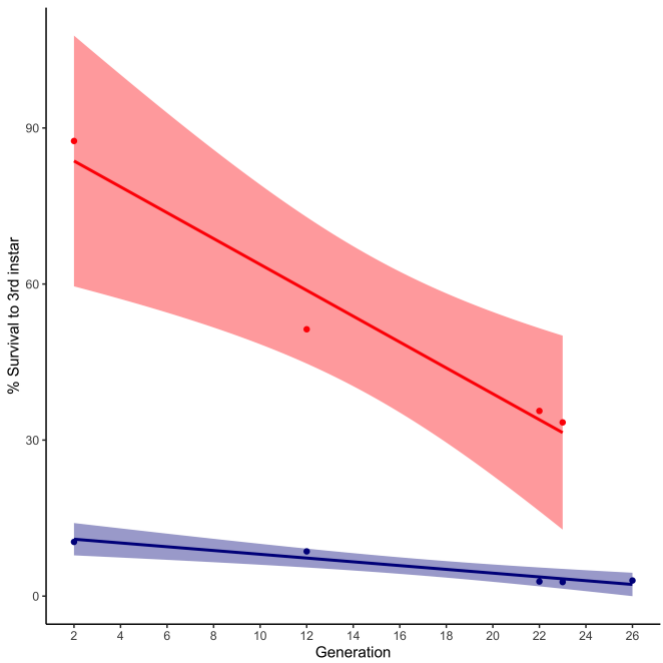

Source: https://www.biorxiv.org/content/10.1101/2021.11.09.467966v2.full.pdf
