# Supplementary material for: Novel genetic basis of resistance to Bt toxin Cry1Ac in Helicoverpa zea
Source: bioRxiv preprint, doi:10.1101/2021.11.09.467966, version 2 (2022-02-02)
Supplement: Supplementary Table S7 [file 467966_file10.xlsx]

## Sheet: ts5_Harm
ID	Chromosome	Gene start	Gene end	log2 CPM (count per million reads)	log2 fold Change (GA-R / BZ)	F (GA-R vs. BZ)	P-value (GA-R vs. BZ)	FDR (GA-R vs. BZ)	Log2 Fold Change (GG / LL)	F (GG vs. LL)	P-value (GG vs. LL)	FDR (GG vs. LL)	Helicoverpa armigera ortholog ID	Helicoverpa armigera ortholog name
MSTRG.3	HzChr01	36740	42904	1.64411	-1.26679	20.0851	0.00053542	0.00764506	0.154504	0.308223	0.587662	0.875552
MSTRG.4	HzChr01	104167	142323	6.27455	-0.531138	1.54739	0.234452	0.459929	-1.07056	6.15478	0.0267963	0.287696	XP_021199497.1	anion exchange protein 2 isoform X3 [Helicoverpa armigera]
MSTRG.5	HzChr01	142558	148066	-0.576254	-1.52092	10.6077	0.00582919	0.0389765	0.259766	0.30984	0.586694	0.875324	XP_021190729.1	potassium/sodium hyperpolarization-activated cyclic nucleotide-gated channel 1-like [Helicoverpa armigera]
MSTRG.6	HzChr01	148067	149647	0.6568	-1.39945	6.38202	0.0244142	0.104698	-1.96156	10.9557	0.00524934	0.168126
MSTRG.7	HzChr01	153628	154596	-1.15557	-0.235265	0.0241436	0.87878	0.958474	-0.832594	0.31003	0.586619	0.875324
MSTRG.8	HzChr01	160859	165667	2.03933	-2.89432	63.5325	1.57447e-06	0.000176102	-1.64208	22.4326	0.000331306	0.0710641	XP_021192754.1	sodium- and chloride-dependent glycine transporter 1-like [Helicoverpa armigera]
MSTRG.9	HzChr01	168668	169596	-1.11819	-2.49816	6.48105	0.0259522	0.109279	-1.31678	2.05122	0.178045	0.545224
MSTRG.10	HzChr01	194924	198805	-0.0907314	-0.5617	2.89792	0.111107	0.283954	0.225358	0.474388	0.502394	0.8307
MSTRG.11	HzChr01	198806	201683	0.659106	-0.470106	2.68153	0.124114	0.303784	0.25542	0.816252	0.381782	0.750881
MSTRG.12	HzChr01	204699	236098	2.5346	-0.339093	5.2177	0.0387356	0.143406	-0.168619	1.28395	0.276473	0.656073	XP_021190711.1	tyrosine-protein kinase Abl, partial [Helicoverpa armigera]
MSTRG.14	HzChr01	210604	218064	3.36652	-1.35652	10.6528	0.00581842	0.0389246	-0.116266	0.0813715	0.779728	0.954633	XP_021201305.1	uncharacterized protein LOC110384368 [Helicoverpa armigera]
MSTRG.18	HzChr01	293302	294146	-0.0712108	-0.134816	0.0138418	0.908057	0.973684	-0.635517	0.324638	0.578087	0.871584
MSTRG.19	HzChr01	296389	326389	-0.00542844	0.527143	0.325461	0.577594	0.782957	0.211531	0.0526387	0.821928	0.969459	XP_021190738.1	probable 3',5'-cyclic phosphodiesterase pde-5 isoform X1 [Helicoverpa armigera]
MSTRG.20	HzChr01	318024	319417	0.448084	0.742581	0.115168	0.740372	0.883878	-0.217951	0.010078	0.921742	1
MSTRG.22	HzChr01	349228	350592	-0.537508	0.304227	0.0697877	0.79557	0.916362	0.13913	0.0156524	0.90225	0.996573	XP_021190736.1	golgin subfamily A member 6-like protein 22 [Helicoverpa armigera]
MSTRG.23	HzChr01	363891	369734	-1.26635	-7.0437	37.4131	0.000991019	0.0115962	0	0	1	1
MSTRG.25	HzChr01	414626	414989	0.952187	3.69264	3.84795	0.0705214	0.21263	1.81963	1.15148	0.301837	0.684545
MSTRG.26	HzChr01	454912	458679	-1.06203	-3.48531	3.88035	0.0693703	0.210394	-1.76094	1.40141	0.256581	0.635205	XP_021196328.1	uncharacterized protein LOC110380621 [Helicoverpa armigera]
MSTRG.27	HzChr01	489928	490386	-0.429462	6.54849	7.8335	0.0164755	0.0804781	0.878249	0.294287	0.597706	0.878679
MSTRG.28	HzChr01	519131	519673	0.755286	2.16423	4.74922	0.0473479	0.163144	2.97833	7.97686	0.0137864	0.230191
MSTRG.29	HzChr01	522200	533234	-0.136398	-0.627196	2.05051	0.174419	0.37708	0.844304	3.98864	0.0659241	0.394508
MSTRG.30	HzChr01	547906	549290	0.644521	-1.12407	2.62725	0.127825	0.309352	-0.13606	0.0401134	0.844202	0.976371
MSTRG.32	HzChr01	580426	708542	-0.374872	-0.440111	0.697766	0.417766	0.651081	0.967316	3.40875	0.0864124	0.427348
MSTRG.33	HzChr01	674007	674736	-0.490884	0.66591	0.601852	0.450967	0.682079	0.114209	0.0200633	0.889408	0.993589
MSTRG.34	HzChr01	675074	675554	1.07386	1.10756	1.41762	0.254082	0.484651	-0.0067003	5.97951e-05	0.993942	1
MSTRG.35	HzChr01	677745	678079	4.85094	0.115594	0.0762085	0.786637	0.911009	-0.103579	0.0619465	0.80715	0.964488
MSTRG.36	HzChr01	708543	713063	2.63418	-0.257179	0.962906	0.343351	0.579628	0.852945	10.5987	0.00584508	0.175015
STRG.20	HzChr01	722239	722624	2.63379	2.47185	2.22807	0.158263	0.353956	2.36783	1.77722	0.204306	0.575831
MSTRG.37	HzChr01	796475	797094	-0.0958927	-2.84118	7.41143	0.0189016	0.0879923	1.39037	2.1613	0.16791	0.535237
MSTRG.38	HzChr01	799875	855167	1.25349	1.53057	18.5343	0.000749885	0.00953162	-0.196277	0.321035	0.580088	0.871802
MSTRG.39	HzChr01	836196	838137	1.50096	-6.70166	142.762	1.15998e-08	7.13409e-06	-0.0476952	0.012859	0.911349	0.999408
MSTRG.40	HzChr01	871412	871779	1.71269	1.25727	0.414575	0.530323	0.746309	1.1912	0.348301	0.564715	0.863437
MSTRG.41	HzChr01	892395	947143	1.55947	0.916282	2.3255	0.150091	0.343137	-0.0786068	0.0182946	0.894382	0.994095	XP_021190723.1	dipeptidase 1-like [Helicoverpa armigera]
MSTRG.42	HzChr01	894758	895968	1.68817	-2.05649	12.8737	0.0030772	0.0253953	0.0674948	0.0151746	0.903755	0.99677
MSTRG.43	HzChr01	894768	895740	2.69312	-1.63449	13.5459	0.00256736	0.0223522	-0.69744	2.51608	0.135568	0.494116
MSTRG.44	HzChr01	898918	899670	0.185002	2.26857	10.5874	0.00586511	0.0391384	0.19759	0.0810831	0.780064	0.954673
MSTRG.45	HzChr01	914614	935213	2.80518	1.52301	0.644074	0.435985	0.669415	-0.176581	0.00936954	0.924294	1
MSTRG.46	HzChr01	1013881	1014197	4.02453	-13.5392	23.9139	0.000404853	0.00640894	-0.510272	0.131795	0.723077	0.932821
MSTRG.47	HzChr01	1025531	1026614	0.767196	7.6843	3.70864	0.105387	0.274974	0	0	1	1
MSTRG.48	HzChr01	1088577	1088911	0.744466	8.54736	13.097	0.00368364	0.0286837	0.552186	0.146735	0.70857	0.926213
MSTRG.49	HzChr01	1154369	1177676	0.618678	-0.0580439	0.0422287	0.840186	0.939413	0.739044	6.90243	0.0200837	0.263015	XP_021192781.1	protein tramtrack, beta isoform-like isoform X1 [Helicoverpa armigera]
MSTRG.50	HzChr01	1180305	1185796	0.573288	-0.321877	1.47774	0.244521	0.472486	-0.474774	3.15507	0.097739	0.445252
MSTRG.51	HzChr01	1185797	1190827	1.55064	-0.0904617	0.149416	0.70499	0.864083	0.0836337	0.12793	0.726	0.934159
MSTRG.52	HzChr01	1193951	1203691	1.37158	-0.367787	2.21757	0.158948	0.355121	0.308278	1.57257	0.230666	0.608512
MSTRG.53	HzChr01	1210451	1210702	4.28935	-0.77955	2.55677	0.132696	0.317952	-0.0784434	0.0260755	0.874081	0.987729
MSTRG.54	HzChr01	1235139	1236943	2.94502	1.28065	17.797	0.000886199	0.0107457	-0.688939	5.2832	0.0377111	0.32795	XP_021194734.1	rhythmically expressed gene 2 protein-like [Helicoverpa armigera]
MSTRG.55	HzChr01	1236508	1242150	5.27987	-0.0341392	0.0362114	0.851851	0.944982	-0.40457	5.05707	0.0414059	0.33784	XP_021194746.1	selenoprotein K-like [Helicoverpa armigera]
MSTRG.56	HzChr01	1241761	1290194	3.14516	0.897489	1.88868	0.191487	0.401395	-0.387376	0.357403	0.559737	0.860998	XP_021194703.1	uncharacterized protein LOC110379374 isoform X1 [Helicoverpa armigera]
MSTRG.57	HzChr01	1308817	1316109	1.07515	-0.552933	2.08488	0.171087	0.37283	-0.149753	0.152602	0.702026	0.923995	XP_021194809.1	adenylate cyclase type 6-like [Helicoverpa armigera]
MSTRG.58	HzChr01	1316578	1316935	-0.53131	0.410189	0.0728825	0.792867	0.914874	6.80816	9.04896	0.013665	0.230126
MSTRG.59	HzChr01	1317850	1346072	-0.963522	1.09464	0.170397	0.688775	0.854104	-6.9817	3.57894	0.0888508	0.431035
MSTRG.61	HzChr01	1367894	1369288	2.46302	10.2188	9.1215	0.0133917	0.0701028	7.83185	4.93863	0.0514145	0.363461
MSTRG.62	HzChr01	1373473	1374066	-1.11249	-7.77637	4.86308	0.0599976	0.191641	6.18378	3.1871	0.113735	0.462974
MSTRG.63	HzChr01	1377725	1377941	0.405529	7.73981	8.8058	0.0188498	0.0879131	-7.41764	8.03099	0.0230243	0.276143
MSTRG.65	HzChr01	1414112	1415291	1.18503	1.99907	4.35353	0.0561928	0.183511	-0.549252	0.375774	0.549947	0.855942
MSTRG.66	HzChr01	1416007	1417361	0.450653	-0.637793	1.01022	0.332154	0.569566	-0.81861	1.77355	0.204527	0.575974
MSTRG.67	HzChr01	1423863	1425305	-0.282587	2.92219	7.35044	0.01712	0.0824983	0.547942	0.316682	0.582682	0.873451
MSTRG.68	HzChr01	1466607	1469239	0.865359	-2.83388	18.983	0.000687793	0.00896205	1.23981	4.00668	0.0655024	0.394078	XP_021193436.1	uncharacterized protein LOC110378482 [Helicoverpa armigera]
MSTRG.69	HzChr01	1493528	1496722	1.06729	-1.16971	1.69714	0.214205	0.432887	0.348143	0.171011	0.685636	0.918977
MSTRG.70	HzChr01	1502112	1523733	-0.532181	0.891422	0.207201	0.656123	0.835294	-2.16818	1.07818	0.317142	0.700166
MSTRG.71	HzChr01	1520599	1521144	2.00568	-1.1871	2.1395	0.166181	0.365672	-0.96642	1.50695	0.240346	0.619746
STRG.44	HzChr01	1540915	1542532	-1.41336	0.485171	0.0472582	0.831119	0.936101	1.33385	0.334352	0.572521	0.868061
MSTRG.72	HzChr01	1563907	1568657	1.64173	-0.549108	1.34797	0.265423	0.497338	-0.4848	1.08112	0.316415	0.699338
MSTRG.73	HzChr01	1591706	1593251	-0.445789	-1.87165	4.94413	0.0434137	0.154491	-0.458538	0.348754	0.564368	0.863437
MSTRG.74	HzChr01	1606664	1608309	0.2272	-0.815402	1.43026	0.251872	0.481996	-0.655684	0.987294	0.337512	0.716647
MSTRG.75	HzChr01	1626686	1634101	-0.19645	-0.814719	0.50985	0.48723	0.711207	0.787366	0.484533	0.498053	0.829563
MSTRG.76	HzChr01	1656877	1684487	2.05539	-1.31329	4.86329	0.0451111	0.157994	0.731519	1.58964	0.228494	0.605802	XP_021193320.1	SET and MYND domain-containing protein 4-like [Helicoverpa armigera]
MSTRG.77	HzChr01	1685934	1691826	2.38025	0.463682	2.18769	0.161585	0.359155	0.769774	6.06191	0.0276191	0.290886
MSTRG.78	HzChr01	1695786	1697350	-2.0029	-0.194935	0.00690118	0.935924	0.985693	0	0	1	1
MSTRG.79	HzChr01	1696073	1696288	-1.15022	0	0	1	1	7.78519	4.81931	0.0732934	0.404303
MSTRG.80	HzChr01	1696543	1697221	3.12998	3.06963	33.1454	5.46925e-05	0.00172109	-1.36562	7.3748	0.017036	0.24873
MSTRG.81	HzChr01	1697918	1713126	2.16844	-0.480513	5.08285	0.0409632	0.149011	-0.102969	0.233098	0.636807	0.895875
MSTRG.82	HzChr01	1715633	1744791	3.79734	5.28706	19.6063	0.000607459	0.00831649	-1.36804	1.7977	0.201869	0.572561	XP_021197407.1	gamma-soluble NSF attachment protein-like [Helicoverpa armigera]
MSTRG.83	HzChr01	1738517	1742654	0.327043	1.87492	4.44839	0.0539056	0.178869	-1.41947	2.6646	0.12544	0.48202
MSTRG.84	HzChr01	1779115	1779978	0.255835	0.740317	1.25251	0.282181	0.515641	-0.848323	1.59047	0.228168	0.605691
MSTRG.85	HzChr01	1784123	1786753	0.349494	-0.622443	2.71847	0.121767	0.300478	0.706647	3.56717	0.0801382	0.417613	XP_021197399.1	SPRY domain-containing SOCS box protein 3-like [Helicoverpa armigera]
MSTRG.86	HzChr01	1787020	1790062	3.01668	-0.885503	15.5266	0.0015188	0.0156463	0.234848	1.10294	0.31167	0.694262
MSTRG.87	HzChr01	1793141	1814918	2.97215	-0.0642087	0.109192	0.74603	0.886859	-0.360126	3.42584	0.085708	0.426894	XP_021197398.1	transcriptional repressor CTCF-like isoform X4 [Helicoverpa armigera]
MSTRG.88	HzChr01	1820805	1831514	1.71844	-0.0789888	0.199234	0.662266	0.839651	0.124648	0.496014	0.492974	0.826425
MSTRG.89	HzChr01	1832071	1832910	-1.32365	-0.156796	0.00330811	0.955108	0.992182	0.658118	0.0581109	0.813695	0.966855
MSTRG.90	HzChr01	1836227	1836834	-0.523336	-0.0594994	0.000673419	0.979736	0.99955	-0.0274502	0.000142832	0.990667	1
MSTRG.91	HzChr01	1838876	1840797	-0.524261	0.104651	0.00173851	0.967447	0.994946	-0.401496	0.0273284	0.87153	0.986654
MSTRG.92	HzChr01	1841396	1844262	-1.26337	-1.14995	1.3062	0.272529	0.505047	1.38031	1.79729	0.201698	0.572561
MSTRG.94	HzChr01	1867660	1868165	-1.46706	-1.39234	0.531705	0.478186	0.704349	0.478231	0.0660541	0.800995	0.962929
MSTRG.95	HzChr01	1911428	1911851	-0.98701	6.56774	4.46342	0.0569255	0.184648	-1.60211	0.483135	0.500628	0.830488
MSTRG.96	HzChr01	1925491	1928116	-0.000232161	2.52783	4.14984	0.0615049	0.194533	2.55481	4.71531	0.048038	0.356096
MSTRG.97	HzChr01	1925929	1926155	1.49876	-9.67267	5.09545	0.0484851	0.165511	-1.58984	0.406145	0.538749	0.852023
MSTRG.98	HzChr01	1928729	1930925	0.238235	2.29175	2.52017	0.135276	0.32116	-0.364744	0.0681442	0.797954	0.961386
MSTRG.99	HzChr01	1928735	1952752	3.83309	-0.346421	4.85427	0.0450934	0.157994	-0.048696	0.0968356	0.760313	0.946013	XP_021198627.1	F-actin-methionine sulfoxide oxidase Mical isoform X1 [Helicoverpa armigera]
MSTRG.99	HzChr01	1928735	1952752	3.83309	-0.346421	4.85427	0.0450934	0.157994	-0.048696	0.0968356	0.760313	0.946013	XP_021198629.1	F-actin-methionine sulfoxide oxidase Mical isoform X3 [Helicoverpa armigera]
MSTRG.100	HzChr01	1953055	1957242	2.39281	-0.0379696	0.00635352	0.937625	0.986148	0.324342	0.480285	0.499911	0.830404	XP_021198629.1	F-actin-methionine sulfoxide oxidase Mical isoform X3 [Helicoverpa armigera]
MSTRG.102	HzChr01	1966711	1967962	-1.0259	-1.33071	0.474267	0.502564	0.724937	-1.38261	0.516426	0.484486	0.820614
MSTRG.103	HzChr01	1970730	1981651	-0.788822	0.409085	0.05703	0.8154	0.927014	1.38996	0.628176	0.443859	0.794524
MSTRG.104	HzChr01	1989400	2099958	3.59276	0.0134614	0.00343003	0.954137	0.992182	0.443843	3.72568	0.0743995	0.406955	XP_021199490.1	protein RCC2 homolog [Helicoverpa armigera]
MSTRG.104	HzChr01	1989400	2099958	3.59276	0.0134614	0.00343003	0.954137	0.992182	0.443843	3.72568	0.0743995	0.406955	XP_021199492.1	protein Jumonji isoform X1 [Helicoverpa armigera]
MSTRG.104	HzChr01	1989400	2099958	3.59276	0.0134614	0.00343003	0.954137	0.992182	0.443843	3.72568	0.0743995	0.406955	XP_021199493.1	protein Jumonji isoform X2 [Helicoverpa armigera]
MSTRG.105	HzChr01	2012558	2013821	2.28211	-3.67353	9.14738	0.00931631	0.0539705	1.3941	1.44115	0.250364	0.628151
MSTRG.106	HzChr01	2014023	2017335	1.84506	3.20894	35.0132	4.13934e-05	0.00145098	-1.61013	9.95758	0.00719128	0.185358
MSTRG.108	HzChr01	2037746	2038092	2.38516	-0.642421	0.617654	0.445344	0.677845	1.17267	1.96526	0.183272	0.551944
MSTRG.109	HzChr01	2039115	2039346	-1.71004	0	0	1	1	-0.890107	0.105838	0.753646	0.944017
MSTRG.110	HzChr01	2040445	2041712	3.20659	-0.691462	4.33027	0.0567116	0.184323	-0.0116347	0.00126032	0.972192	1	XP_021186557.1	uncharacterized protein LOC110373577 [Helicoverpa armigera]
MSTRG.112	HzChr01	2091014	2091329	2.72813	10.2806	5.17413	0.0426856	0.152667	-2.61822	1.01728	0.333646	0.713876
STRG.86	HzChr01	2167776	2168678	1.71833	0.6509	3.20437	0.0954036	0.258255	-0.308378	0.731604	0.406973	0.769221
STRG.87	HzChr01	2210820	2211191	0.0252704	8.51033	12.9675	0.00380495	0.029294	2.2719	1.82539	0.202317	0.572798
MSTRG.115	HzChr01	2365046	2365830	0.26157	-0.00979837	5.18448e-05	0.994359	1	-0.533719	0.14524	0.708989	0.926213
MSTRG.116	HzChr01	2416657	2421121	2.71878	1.56881	1.53364	0.236435	0.462419	1.27042	0.985794	0.338041	0.7168	XP_021186359.1	uncharacterized protein K02A2 6-like [Helicoverpa armigera]
MSTRG.118	HzChr01	2491928	2495846	2.93588	-1.10952	4.57022	0.0511279	0.172454	0.907829	3.12765	0.0992958	0.445997	XP_021198800.1	uncharacterized protein LOC110382511, partial [Helicoverpa armigera]
MSTRG.119	HzChr01	2525277	2599407	4.99163	0.0863386	0.197043	0.664001	0.84047	-0.884641	20.4309	0.000497779	0.0823966	XP_021192200.1	biogenesis of lysosome-related organelles complex 1 subunit 2 isoform X4 [Helicoverpa armigera]
MSTRG.120	HzChr01	2528603	2536703	0.97718	-0.0484117	0.044681	0.835682	0.938097	-0.11155	0.236957	0.634055	0.894496
MSTRG.121	HzChr01	2537908	2540414	-1.18581	-0.0132875	7.23956e-05	0.993334	1	1.40429	0.767852	0.395962	0.760918
MSTRG.122	HzChr01	2540907	2542723	-0.835125	-2.43595	1.0623	0.323605	0.56023	-0.566924	0.0630443	0.806119	0.964412
MSTRG.123	HzChr01	2601027	2650065	2.89094	0.434121	2.84173	0.114317	0.289039	0.577325	5.08277	0.0409644	0.336142
MSTRG.124	HzChr01	2650887	2651890	2.29248	5.99245	5.40137	0.0390661	0.144273	-0.454805	0.113217	0.742491	0.940794	XP_021192692.1	uncharacterized protein LOC110377958 [Helicoverpa armigera]
MSTRG.125	HzChr01	2651818	2655231	2.73215	0.154487	0.457497	0.509977	0.729952	-0.640645	7.73055	0.0149025	0.239122	XP_021192202.1	malignant fibrous histiocytoma-amplified sequence 1 homolog [Helicoverpa armigera]
MSTRG.126	HzChr01	2659808	2667684	-1.88047	-0.326555	0.0182442	0.896039	0.967693	0	0	1	1
MSTRG.129	HzChr01	2693738	2764577	-0.0689264	2.31672	2.92159	0.110017	0.282416	0.899157	0.516192	0.484583	0.820614	XP_021192175.1	tyrosine-protein phosphatase non-receptor type 61F isoform X3 [Helicoverpa armigera]
MSTRG.130	HzChr01	2702568	2703077	-0.51063	0.0415806	0.000547481	0.981671	1	2.03882	1.16287	0.299552	0.681692
MSTRG.132	HzChr01	2765769	2827695	2.74825	-0.0714962	0.299943	0.592668	0.793059	0.105391	0.648142	0.434433	0.788083	XP_021192169.1	ADP-ribosylation factor GTPase-activating protein 1 isoform X2 [Helicoverpa armigera]
MSTRG.133	HzChr01	2774228	2835290	0.912067	0.12841	0.0230906	0.881444	0.959825	1.01427	1.37915	0.26032	0.639285	XP_021192184.1	peroxisomal membrane protein PEX16 [Helicoverpa armigera]
MSTRG.134	HzChr01	2835563	2857143	-0.107808	-0.0792803	0.0137098	0.908477	0.973684	0.0738778	0.0121629	0.913771	0.999666
MSTRG.136	HzChr01	2860892	2863462	-0.0439523	1.88538	17.916	0.000861844	0.0105215	-0.686747	2.58467	0.130539	0.488394
MSTRG.140	HzChr01	2885679	2886666	0.906778	1.03962	2.76973	0.11871	0.29592	0.28585	0.239574	0.632242	0.894277
MSTRG.143	HzChr01	2954288	2954711	1.55492	9.11803	16.1755	0.00179294	0.0174777	-1.6601	1.5604	0.236112	0.615111
MSTRG.145	HzChr01	2970620	3004832	4.31918	-0.432234	1.68163	0.216192	0.435712	0.578326	3.07498	0.10191	0.449106	XP_021192158.1	LOW QUALITY PROTEIN: titin homolog [Helicoverpa armigera]
MSTRG.146	HzChr01	3009606	3012581	-1.90803	1.07428	0.169812	0.689278	0.854149	-4.73651	2.14055	0.175227	0.541612
MSTRG.147	HzChr01	3015026	3016341	-0.723726	6.17256	23.1745	0.000286616	0.0051054	-0.0720483	0.0050234	0.972374	1
MSTRG.150	HzChr01	3065717	3072785	-0.33737	-1.4591	6.9865	0.0194714	0.0895836	0.260349	0.230511	0.638668	0.896431	XP_021192172.1	pyruvate dehydrogenase phosphatase regulatory subunit, mitochondrial [Helicoverpa armigera]
MSTRG.151	HzChr01	3073256	3081587	-0.819627	-1.65221	4.85021	0.045171	0.158084	0.795987	1.17184	0.29758	0.679456
MSTRG.153	HzChr01	3082505	3083490	0.233587	-1.04763	0.962015	0.343738	0.580206	0.763765	0.525273	0.480836	0.81876
MSTRG.154	HzChr01	3087196	3089693	-0.369421	-0.161812	0.0683418	0.797629	0.917692	0.907105	1.91524	0.188363	0.558289
MSTRG.155	HzChr01	3090087	3099368	0.8463	-0.609815	1.06474	0.319953	0.556133	-0.44752	0.576428	0.460539	0.805462	XP_021192180.1	uncharacterized protein LOC110377584 isoform X1 [Helicoverpa armigera]
STRG.128	HzChr01	3119410	3119835	0.881895	9.19759	11.2625	0.00593765	0.0393832	0.839717	0.247557	0.628054	0.892909	XP_021199056.1	uncharacterized protein LOC110382711 [Helicoverpa armigera]
MSTRG.160	HzChr01	3174544	3179893	1.12106	0.774163	2.24918	0.15627	0.351254	0.46633	0.808575	0.384004	0.752324	XP_021194827.1	laminin subunit alpha-like [Helicoverpa armigera]
MSTRG.161	HzChr01	3175258	3196667	-1.15465	0.0761594	0.0033797	0.954475	0.992182	2.93852	4.03131	0.06466	0.392331	XP_021194827.1	laminin subunit alpha-like [Helicoverpa armigera]
MSTRG.162	HzChr01	3196990	3198298	-1.42025	0.763155	0.0949528	0.76341	0.897254	2.1509	0.707525	0.41719	0.777024
MSTRG.163	HzChr01	3198860	3200330	-0.510299	0.38905	0.0290084	0.86768	0.95278	-1.00506	0.181044	0.678228	0.915533
MSTRG.169	HzChr01	3274625	3275302	-1.67758	6.45191	3.86876	0.0863693	0.242376	5.79319	3.0494	0.1206	0.4741
MSTRG.170	HzChr01	3305279	3315414	-1.01378	1.026	0.948978	0.346751	0.583468	2.12516	3.7676	0.0729647	0.404303
MSTRG.171	HzChr01	3316956	3343350	2.72819	0.975347	7.37773	0.0169531	0.0821364	0.102616	0.0847305	0.775338	0.95291	XP_021194824.1	laminin subunit gamma-1 [Helicoverpa armigera]
MSTRG.178	HzChr01	3513640	3533578	0.676592	0.0404796	0.0054539	0.942189	0.987631	0.137336	0.0622486	0.806653	0.964412	XP_021194820.1	roquin-1 isoform X2 [Helicoverpa armigera]
MSTRG.179	HzChr01	3576283	3596596	0.256838	-1.19197	1.73616	0.209283	0.426226	-0.448689	0.285971	0.601405	0.879878	XP_021185766.1	atypical kinase COQ8B, mitochondrial [Helicoverpa armigera]
MSTRG.179	HzChr01	3576283	3596596	0.256838	-1.19197	1.73616	0.209283	0.426226	-0.448689	0.285971	0.601405	0.879878	XP_021194526.1	uncharacterized protein LOC110379255 isoform X1 [Helicoverpa armigera]
MSTRG.179	HzChr01	3576283	3596596	0.256838	-1.19197	1.73616	0.209283	0.426226	-0.448689	0.285971	0.601405	0.879878	XP_021194528.1	uncharacterized protein LOC110379255 isoform X3 [Helicoverpa armigera]
MSTRG.180	HzChr01	3576598	3581334	1.68424	5.27461	16.5945	0.00119575	0.0133993	1.16362	1.34674	0.265736	0.644174	XP_021183358.1	zinc finger protein 780A-like [Helicoverpa armigera]
MSTRG.182	HzChr01	3609580	3611742	4.81621	0.212649	2.97882	0.106674	0.276662	0.0190881	0.0239531	0.879246	0.990373	XP_021186832.1	peptidyl-prolyl cis-trans isomerase-like 1 [Helicoverpa armigera]
MSTRG.183	HzChr01	3620622	3627868	-0.907496	-0.125154	0.060499	0.80933	0.923421	-0.0161575	0.00100813	0.975125	1
MSTRG.184	HzChr01	3627869	3632432	0.739334	-0.145805	0.217807	0.648	0.829012	0.508611	2.67107	0.12479	0.480944
MSTRG.185	HzChr01	3669589	3682420	1.22778	-0.304432	0.80453	0.385127	0.620974	0.305126	0.801891	0.385885	0.754292	XP_021186839.1	PHD finger protein rhinoceros [Helicoverpa armigera]
MSTRG.186	HzChr01	3675234	3676212	4.36229	-0.101305	0.110956	0.744117	0.885997	-0.0499047	0.0274006	0.870952	0.986426
MSTRG.188	HzChr01	3691601	3807594	1.09676	-1.17811	4.59999	0.0503645	0.170223	-1.43723	6.28827	0.025372	0.284387	XP_021185773.1	F-BAR and double SH3 domains protein 2 isoform X1 [Helicoverpa armigera]
MSTRG.188	HzChr01	3691601	3807594	1.09676	-1.17811	4.59999	0.0503645	0.170223	-1.43723	6.28827	0.025372	0.284387	XP_021185775.1	F-BAR and double SH3 domains protein 2 isoform X2 [Helicoverpa armigera]
MSTRG.190	HzChr01	3740229	3740488	3.70987	-0.285573	0.0778701	0.784386	0.909933	-0.976532	0.906899	0.357492	0.729626
MSTRG.197	HzChr01	3840012	3840379	-0.34177	0.404793	0.0513387	0.824107	0.932252	0.0957873	0.00292542	0.957649	1
MSTRG.198	HzChr01	3842065	3851586	-0.257629	-0.967485	0.153632	0.70216	0.862918	7.11436	3.58679	0.0833183	0.423622	XP_021185787.1	protein ABHD16A isoform X2 [Helicoverpa armigera]
MSTRG.199	HzChr01	3857109	3873611	-1.37935	-0.0248571	0.000271632	0.987087	1	0.868109	0.322714	0.579114	0.871802
MSTRG.200	HzChr01	3873971	3887358	3.03257	-0.806854	7.97792	0.0136689	0.0711929	-0.218043	0.588932	0.455766	0.802669	XP_021185798.1	protein GPR107 [Helicoverpa armigera]
MSTRG.201	HzChr01	3897499	3923935	2.85331	-0.329759	2.24661	0.156437	0.351387	0.766285	12.3881	0.00346883	0.145657
MSTRG.202	HzChr01	3926032	3927496	2.20856	-0.939604	4.89456	0.0444458	0.1568	-0.167421	0.157322	0.697739	0.922961
MSTRG.210	HzChr01	4046512	4049530	3.19578	-3.18507	34.7429	4.32453e-05	0.0014872	-0.255957	0.272899	0.609764	0.884097	XP_021198662.1	uncharacterized protein LOC110382384 [Helicoverpa armigera]
MSTRG.217	HzChr01	4237042	4237806	0.21406	0.789575	0.113402	0.741423	0.884594	-0.125868	0.00280132	0.958556	1
MSTRG.220	HzChr01	4249619	4249945	-1.42252	4.97988	2.98764	0.115679	0.291054	5.86477	3.66443	0.0856505	0.426894
MSTRG.223	HzChr01	4278257	4279439	1.66097	1.86011	18.2908	0.000792848	0.00989343	-0.48164	1.30064	0.273519	0.65223
MSTRG.228	HzChr01	4435743	4538289	1.767	-0.215404	1.33011	0.268375	0.500213	0.0177382	0.00901591	0.925718	1	XP_021185826.1	disco-interacting protein 2 isoform X7 [Helicoverpa armigera]
MSTRG.230	HzChr01	4517141	4517457	-0.945337	7.28957	9.69797	0.0114406	0.0624035	-4.30255	3.8783	0.0782553	0.413776
MSTRG.231	HzChr01	4540579	4598433	-1.52369	-0.404171	0.0615231	0.807766	0.922703	-0.136457	0.00634445	0.93766	1	XP_021185806.1	protein phosphatase 1 regulatory subunit 12A isoform X3 [Helicoverpa armigera]
MSTRG.231	HzChr01	4540579	4598433	-1.52369	-0.404171	0.0615231	0.807766	0.922703	-0.136457	0.00634445	0.93766	1	XP_021185813.1	protein phosphatase 1 regulatory subunit 12C isoform X10 [Helicoverpa armigera]
MSTRG.231	HzChr01	4540579	4598433	-1.52369	-0.404171	0.0615231	0.807766	0.922703	-0.136457	0.00634445	0.93766	1	XP_021185816.1	protein phosphatase 1 regulatory subunit 12B isoform X13 [Helicoverpa armigera]
MSTRG.233	HzChr01	4639932	4644097	-1.29365	-5.19651	2.76485	0.128422	0.310343	-0.068499	0.000818015	0.977765	1	XP_021190867.1	uncharacterized protein K02A2 6-like [Helicoverpa armigera]
MSTRG.238	HzChr01	4751669	4757930	0.564806	0.15553	0.289685	0.598998	0.797414	0.14274	0.24486	0.628504	0.893146
MSTRG.239	HzChr01	4811286	4833291	2.54887	2.5015	7.25255	0.0178003	0.084628	-1.59165	3.1253	0.0994103	0.445997
MSTRG.245	HzChr01	4931489	5018640	5.30979	0.485395	0.339479	0.569627	0.777064	-0.114207	0.0189396	0.892548	0.993937	XP_021185781.1	carcinine transporter-like [Helicoverpa armigera]
MSTRG.250	HzChr01	5195338	5257599	0.0957599	-0.262716	0.73835	0.404873	0.639364	0.227641	0.554931	0.46881	0.811932
MSTRG.251	HzChr01	5261333	5262810	-1.58986	0.0528536	0.000413906	0.984113	1	0.0619315	0.000570801	0.981343	1
STRG.217	HzChr01	5280161	5280924	-1.04108	0.0980014	0.00132252	0.971516	0.99597	1.94319	0.482748	0.498832	0.829787	XP_021185782.1	type II inositol 3,4-bisphosphate 4-phosphatase [Helicoverpa armigera]
MSTRG.253	HzChr01	5284990	5304150	0.830778	-2.93553	9.33389	0.00877162	0.0517633	-0.104345	0.014441	0.906098	0.997755	XP_021185790.1	importin-7 isoform X1 [Helicoverpa armigera]
MSTRG.253	HzChr01	5284990	5304150	0.830778	-2.93553	9.33389	0.00877162	0.0517633	-0.104345	0.014441	0.906098	0.997755	XP_021185791.1	importin-7 isoform X2 [Helicoverpa armigera]
MSTRG.254	HzChr01	5318738	5320585	3.10305	-0.347108	2.44453	0.140576	0.328747	0.137567	0.383165	0.546	0.854628
MSTRG.258	HzChr01	5387761	5390029	2.33383	-0.222191	0.791852	0.388794	0.624701	0.735892	8.56137	0.0112002	0.219974	XP_021189694.1	uncharacterized protein LOC110375771 [Helicoverpa armigera]
MSTRG.259	HzChr01	5390498	5403064	5.18396	0.0781454	0.241113	0.631121	0.818658	-0.350128	4.84539	0.0452635	0.345201
MSTRG.260	HzChr01	5405173	5407416	2.2805	-0.0353109	0.0332086	0.860026	0.949199	-0.00235193	0.000146227	0.990525	1
MSTRG.261	HzChr01	5407837	5453047	0.971529	0.312166	0.0489137	0.828237	0.934785	0.420301	0.0940137	0.763761	0.94797	XP_021189664.1	calpain-C [Helicoverpa armigera]
MSTRG.262	HzChr01	5428914	5430090	-0.891984	-1.23092	0.710899	0.413627	0.647431	0.149967	0.0110458	0.917821	1
MSTRG.263	HzChr01	5458548	5526318	3.19907	-0.488071	6.77839	0.0210285	0.0943371	0.0993089	0.283012	0.603195	0.880282	XP_021189646.1	uncharacterized protein LOC110375727 isoform X1 [Helicoverpa armigera]
MSTRG.263	HzChr01	5458548	5526318	3.19907	-0.488071	6.77839	0.0210285	0.0943371	0.0993089	0.283012	0.603195	0.880282	XP_021189647.1	E3 ubiquitin-protein ligase RBBP6 isoform X2 [Helicoverpa armigera]
MSTRG.263	HzChr01	5458548	5526318	3.19907	-0.488071	6.77839	0.0210285	0.0943371	0.0993089	0.283012	0.603195	0.880282	XP_021189648.1	FH1/FH2 domain-containing protein 3 isoform X3 [Helicoverpa armigera]
MSTRG.264	HzChr01	5483753	5484430	0.398796	-2.92649	2.24682	0.156648	0.351556	1.65911	0.706146	0.415198	0.77543
MSTRG.267	HzChr01	5551618	5563397	8.22009	-0.193272	0.57503	0.461124	0.690834	0.466128	3.33583	0.0896698	0.432311	XP_021189643.1	paramyosin, long form isoform X1 [Helicoverpa armigera]
MSTRG.270	HzChr01	5633740	5634855	0.429642	1.15916	1.96985	0.182757	0.388943	0.414845	0.298411	0.593679	0.877278
STRG.232	HzChr01	5652050	5652643	0.172748	0.818456	0.631565	0.440376	0.673177	0.276362	0.0743451	0.789192	0.957908
MSTRG.272	HzChr01	5687328	5704234	-0.140151	2.03571	14.0431	0.00221559	0.0203004	-0.388654	0.530763	0.478471	0.81784	XP_021189695.1	epidermal growth factor receptor isoform X1 [Helicoverpa armigera]
MSTRG.273	HzChr01	5715656	5716276	2.1581	3.76269	45.1301	1.11459e-05	0.000625324	-1.08438	4.64925	0.0494166	0.358126
MSTRG.274	HzChr01	5717302	5731396	-0.408215	-0.388023	0.131593	0.722314	0.8735	1.13591	1.0908	0.314349	0.697512
MSTRG.276	HzChr01	5732524	5844312	3.70946	0.363178	4.60006	0.0502769	0.17006	0.489539	8.3796	0.0119092	0.221843	XP_021189661.1	RING finger and SPRY domain-containing protein 1-like isoform X1 [Helicoverpa armigera]
MSTRG.276	HzChr01	5732524	5844312	3.70946	0.363178	4.60006	0.0502769	0.17006	0.489539	8.3796	0.0119092	0.221843	XP_021189663.1	RING finger and SPRY domain-containing protein 1-like isoform X2 [Helicoverpa armigera]
MSTRG.277	HzChr01	5743851	5823521	3.48619	0.0889825	0.0833106	0.777182	0.905906	0.390275	1.6104	0.225575	0.60189
MSTRG.278	HzChr01	5763095	5763339	4.99869	7.00776	29.6534	9.41885e-05	0.002462	-0.292131	0.0810036	0.780212	0.954673
MSTRG.279	HzChr01	5808476	5855694	1.97754	-0.604084	9.39217	0.00852243	0.0505228	-0.488622	6.12497	0.0269506	0.287929	XP_021189649.1	sulfhydryl oxidase 1 isoform X1 [Helicoverpa armigera]
MSTRG.279	HzChr01	5808476	5855694	1.97754	-0.604084	9.39217	0.00852243	0.0505228	-0.488622	6.12497	0.0269506	0.287929	XP_021189650.1	sulfhydryl oxidase 1 isoform X2 [Helicoverpa armigera]
MSTRG.279	HzChr01	5808476	5855694	1.97754	-0.604084	9.39217	0.00852243	0.0505228	-0.488622	6.12497	0.0269506	0.287929	XP_021189654.1	flotillin-1 isoform X2 [Helicoverpa armigera]
MSTRG.280	HzChr01	5808912	5817075	-1.17691	0.122303	0.016286	0.900294	0.969864	-0.363348	0.133923	0.719949	0.931547
MSTRG.281	HzChr01	5857548	5868323	2.8801	-0.044818	0.11696	0.737509	0.882023	-0.18244	1.92811	0.186976	0.557402	XP_021189670.1	uncharacterized protein LOC110375745 [Helicoverpa armigera]
MSTRG.282	HzChr01	5876649	5914771	6.41202	14.3548	61.4022	5.5682e-06	0.000405571	-0.425318	0.227886	0.641923	0.897985
MSTRG.284	HzChr01	5972642	6004042	1.25229	-1.24429	22.1628	0.0003495	0.00575764	-0.655596	6.22841	0.0258946	0.286353
MSTRG.285	HzChr01	5975207	5985387	4.65575	-0.762539	0.458321	0.509716	0.729846	0.463602	0.172959	0.683957	0.917993
MSTRG.287	HzChr01	6019850	6023301	-0.743596	-0.434435	0.900597	0.358949	0.595493	0.766675	2.8306	0.114967	0.464734
MSTRG.288	HzChr01	6066779	6075057	6.40975	-0.531894	5.69872	0.0319492	0.125917	-0.24141	1.17367	0.297308	0.679456
MSTRG.289	HzChr01	6084226	6101819	6.15144	0.50508	1.51828	0.238676	0.465679	0.845364	4.23933	0.0591007	0.381046	XP_021196372.1	chitinase-like protein EN03 isoform X2 [Helicoverpa armigera]
MSTRG.290	HzChr01	6163191	6167650	2.3458	3.29716	23.3366	0.000285907	0.0051054	0.503663	0.659917	0.430524	0.785797
MSTRG.291	HzChr01	6168929	6170447	1.96085	-2.07615	8.22615	0.0126559	0.0674135	-0.925811	1.78258	0.203664	0.575024
MSTRG.294	HzChr01	6257442	6264076	-1.38092	-5.66544	2.53716	0.143365	0.333166	-1.09015	0.159008	0.698747	0.922961
MSTRG.296	HzChr01	6285362	6294375	-0.943313	-5.99503	3.80901	0.0754212	0.222488	2.10566	0.80132	0.388811	0.757353
MSTRG.297	HzChr01	6299398	6301010	1.16105	0.546306	2.38344	0.145249	0.336158	0.359424	1.07875	0.316839	0.699918
MSTRG.300	HzChr01	6321449	6321673	0.719155	-10.0132	7.2451	0.0233004	0.101237	7.30404	3.78121	0.0815089	0.420844
MSTRG.301	HzChr01	6330878	6339060	2.16302	0.572157	2.52965	0.13437	0.320064	0.550482	2.36179	0.146951	0.507729	XP_021192487.1	uncharacterized protein LOC110377794 isoform X2 [Helicoverpa armigera]
MSTRG.302	HzChr01	6369865	6376732	-0.480744	1.68457	1.43063	0.252018	0.482204	1.52554	1.29793	0.274182	0.652851	XP_021192501.1	tyrosine 3-monooxygenase [Helicoverpa armigera]
MSTRG.304	HzChr01	6470397	6472580	2.21344	-3.928	67.5678	1.15403e-06	0.000145262	-0.805705	3.52141	0.0820322	0.421708	XP_021198899.1	uncharacterized protein LOC110382584 [Helicoverpa armigera]
MSTRG.305	HzChr01	6476856	6477158	6.53895	-7.41648	94.8015	1.61057e-07	4.53936e-05	-2.2384	13.9816	0.00228895	0.127366
MSTRG.306	HzChr01	6591713	6623399	1.20199	0.253288	0.518806	0.483377	0.707718	0.139453	0.159285	0.695925	0.922266	XP_021192525.1	serine/threonine-protein kinase OSR1-like [Helicoverpa armigera]
MSTRG.307	HzChr01	6598074	6603029	6.61308	0.0203104	0.0047076	0.946293	0.989005	-0.833074	7.8222	0.0145466	0.235933
MSTRG.308	HzChr01	6605070	6605483	0.905328	-1.65196	2.58451	0.130781	0.314616	-0.643948	0.422923	0.526273	0.844358
MSTRG.309	HzChr01	6629425	6641315	1.65776	-0.124802	0.0653357	0.802051	0.919783	-0.8564	2.96271	0.107695	0.454219	XP_021192524.1	uncharacterized protein LOC110377823, partial [Helicoverpa armigera]
MSTRG.310	HzChr01	6641680	6666273	0.743822	-0.592826	1.70661	0.212785	0.430997	1.04066	5.49278	0.0346176	0.316953	XP_021192489.1	putative fatty acyl-CoA reductase CG5065 [Helicoverpa armigera]
MSTRG.311	HzChr01	6666281	6668706	7.57721	-0.735623	32.8921	5.45826e-05	0.00172109	0.15784	1.52819	0.237018	0.616218	XP_021192490.1	triosephosphate isomerase [Helicoverpa armigera]
MSTRG.312	HzChr01	6670197	6754063	3.94188	-0.476027	8.65459	0.0108556	0.0600593	-0.0374942	0.0536348	0.820255	0.968806	XP_021192496.1	protein disulfide-isomerase A5 isoform X1 [Helicoverpa armigera]
MSTRG.312	HzChr01	6670197	6754063	3.94188	-0.476027	8.65459	0.0108556	0.0600593	-0.0374942	0.0536348	0.820255	0.968806	XP_021192497.1	protein disulfide-isomerase A5 isoform X2 [Helicoverpa armigera]
MSTRG.313	HzChr01	6687864	6689866	-0.483158	2.14089	0.649551	0.439671	0.672764	-6.99303	3.50215	0.0918547	0.434634
MSTRG.314	HzChr01	6770407	6782123	1.61042	-0.25536	0.472369	0.50329	0.725178	0.859412	5.3003	0.0374414	0.326888	XP_021192491.1	palmitoyltransferase ZDHHC3 [Helicoverpa armigera]
MSTRG.314	HzChr01	6770407	6782123	1.61042	-0.25536	0.472369	0.50329	0.725178	0.859412	5.3003	0.0374414	0.326888	XP_021192495.1	uncharacterized protein LOC110377801 [Helicoverpa armigera]
MSTRG.315	HzChr01	6782754	6783962	0.477437	-0.22025	0.035036	0.854273	0.946546	-1.47277	1.49116	0.242701	0.622443
MSTRG.316	HzChr01	6794090	6797530	0.402462	0.200676	0.379229	0.548041	0.761478	0.0864834	0.0694693	0.796007	0.960557
MSTRG.317	HzChr01	6797660	6818022	4.84988	-0.132155	0.134095	0.719834	0.872076	1.08751	9.04404	0.00963496	0.206186
MSTRG.318	HzChr01	6826797	6832431	5.10188	-0.397695	2.39559	0.144497	0.334947	-0.336031	1.71419	0.21201	0.583493	XP_021192498.1	transmembrane protein 208 [Helicoverpa armigera]
MSTRG.319	HzChr01	6832626	6839379	5.82213	1.57484	17.0095	0.00108465	0.0124305	0.692704	3.43375	0.0856077	0.426886
MSTRG.320	HzChr01	6843798	6844140	-0.138654	-1.63506	0.3231	0.578979	0.784374	0.0605309	0.000477001	0.982891	1
MSTRG.322	HzChr01	6853798	6911540	6.22175	-0.40036	2.15686	0.164591	0.36353	-0.00123292	2.05731e-05	0.996447	1	XP_021192522.1	peroxidasin-like [Helicoverpa armigera]
MSTRG.323	HzChr01	6873323	6875019	2.68336	0.151126	0.526539	0.480194	0.705627	-0.636583	9.20931	0.00904162	0.201763
MSTRG.324	HzChr01	6888367	6888676	4.92258	-0.0192466	0.00262792	0.959858	0.994054	0.360978	0.916249	0.355103	0.728236
MSTRG.325	HzChr01	6915604	6942728	2.05038	-0.768769	17.454	0.000958126	0.0113239	-0.027296	0.0217518	0.884883	0.991576	XP_021199759.1	sterol regulatory element-binding protein cleavage-activating protein-like [Helicoverpa armigera]
MSTRG.326	HzChr01	6935042	6935266	1.17805	0.0614968	0.000979338	0.975488	0.99757	-0.447262	0.0564831	0.815672	0.967351
MSTRG.327	HzChr01	6945492	6957172	2.7306	0.319249	0.889496	0.361887	0.598147	0.479852	2.00085	0.179449	0.546921	XP_021199758.1	protein enabled homolog [Helicoverpa armigera]
MSTRG.328	HzChr01	6958557	6959465	4.92909	0.931133	13.8305	0.00236739	0.02111	-0.218229	0.77096	0.395051	0.760594
MSTRG.329	HzChr01	6964340	6965758	-0.860375	-7.14073	3.79321	0.0810977	0.232463	0.0655568	0.000630337	0.980481	1
MSTRG.330	HzChr01	6966053	6967188	0.00152975	-0.639286	0.826672	0.378846	0.614428	-0.231856	0.106952	0.74855	0.94249
MSTRG.331	HzChr01	6967317	6968661	-0.461635	-2.26925	11.5139	0.00445269	0.0323957	0.311639	0.236573	0.634327	0.894496
MSTRG.332	HzChr01	6968898	6970123	0.824672	-1.60497	20.3979	0.00050124	0.00734302	0.172749	0.241637	0.630754	0.894277
MSTRG.333	HzChr01	6978747	6997760	3.7277	1.12178	20.1683	0.000526266	0.00757274	0.491169	3.93962	0.0674163	0.395841	XP_021199758.1	protein enabled homolog [Helicoverpa armigera]
MSTRG.335	HzChr01	6996767	6997022	1.22205	9.75327	89.7421	3.37256e-06	0.000289947	-0.706531	1.38526	0.267406	0.64585
MSTRG.337	HzChr01	7012039	7022402	6.58986	-1.33023	80.7264	3.87636e-07	7.23506e-05	-0.149708	1.05356	0.322349	0.704522
MSTRG.339	HzChr01	7031975	7034078	1.05198	-1.56279	20.7492	0.0004658	0.00702468	0.238899	0.494072	0.493807	0.826715	XP_021199209.1	uncharacterized protein LOC110382831 [Helicoverpa armigera]
MSTRG.340	HzChr01	7037437	7037924	0.461766	1.4911	1.3225	0.269885	0.501945	0.524745	0.159057	0.696193	0.92231
MSTRG.341	HzChr01	7042778	7100223	5.6646	-0.320728	1.36486	0.26269	0.494235	-0.39992	2.11097	0.168838	0.536252	XP_021198813.1	peptide transporter family 1-like [Helicoverpa armigera]
STRG.298	HzChr01	7102213	7113679	-1.06684	0.987714	0.389004	0.544813	0.759271	-0.292271	0.0327435	0.859508	0.981576	XP_021200048.1	BPTI/Kunitz domain-containing protein-like [Helicoverpa armigera]
MSTRG.342	HzChr01	7123490	7158197	3.12002	-0.0306948	0.0121701	0.913746	0.975922	0.0266326	0.0092023	0.924957	1	XP_021187914.1	SPARC-related modular calcium-binding protein 1 isoform X3 [Helicoverpa armigera]
MSTRG.342	HzChr01	7123490	7158197	3.12002	-0.0306948	0.0121701	0.913746	0.975922	0.0266326	0.0092023	0.924957	1	XP_021187916.1	SPARC-related modular calcium-binding protein 2 isoform X5 [Helicoverpa armigera]
MSTRG.343	HzChr01	7157982	7169326	1.82405	1.04195	7.10087	0.018673	0.0874306	0.0280415	0.00538072	0.942578	1	XP_021187892.1	uncharacterized protein LOC110374495 [Helicoverpa armigera]
MSTRG.344	HzChr01	7168448	7207790	3.24685	-0.137484	0.589183	0.455672	0.686057	-0.108797	0.368486	0.55369	0.857342	XP_021187951.1	ubiquitin carboxyl-terminal hydrolase 35 [Helicoverpa armigera]
MSTRG.345	HzChr01	7183126	7183633	6.39557	10.2493	34.9573	4.19292e-05	0.00145751	-2.09819	3.00976	0.105266	0.452359
MSTRG.347	HzChr01	7231484	7237566	0.108986	0.277994	0.715155	0.412164	0.645984	0.845945	6.68366	0.021785	0.270798
MSTRG.348	HzChr01	7372862	7373298	2.09713	-0.783094	0.635574	0.438961	0.672075	-0.850248	0.795907	0.38777	0.756268
MSTRG.349	HzChr01	7441202	7441429	-1.22747	7.11766	4.18516	0.0689858	0.20962	5.40257	2.49546	0.146341	0.507167
MSTRG.351	HzChr01	7455510	7455869	3.11004	2.42234	27.5421	0.000133817	0.00308873	-0.472524	1.23262	0.286067	0.667748	XP_021191701.1	uncharacterized protein LOC110377230 [Helicoverpa armigera]
MSTRG.352	HzChr01	7480515	7510642	6.46208	-0.320449	1.12975	0.306264	0.54215	0.246286	0.67001	0.427102	0.783222
MSTRG.353	HzChr01	7488623	7521085	7.39719	15.6932	36.5028	6.59362e-05	0.00196069	-2.7551	4.32519	0.0603275	0.384536
MSTRG.354	HzChr01	7510997	7512894	0.0885018	-0.833475	3.51056	0.0823154	0.235013	0.371448	0.736279	0.405516	0.767968
MSTRG.355	HzChr01	7522640	7525769	3.94692	-0.677075	8.1352	0.0129474	0.0685715	0.124577	0.27353	0.609272	0.883768
MSTRG.356	HzChr01	7523148	7523511	-0.00286222	-0.337663	0.0486348	0.829272	0.935217	1.29896	0.732007	0.409477	0.77138
MSTRG.357	HzChr01	7524426	7524956	-0.635683	-1.3375	0.826593	0.379027	0.61449	-1.47029	0.969524	0.341924	0.71979
MSTRG.359	HzChr01	7528627	7531104	2.51262	-4.28195	33.4165	5.25254e-05	0.00169545	2.16579	10.1787	0.00672316	0.185142
MSTRG.360	HzChr01	7532780	7534090	2.03315	-2.82375	10.0392	0.00701972	0.0442014	1.98648	5.21644	0.0389359	0.33047	XP_021183358.1	zinc finger protein 780A-like [Helicoverpa armigera]
MSTRG.361	HzChr01	7562390	7591675	2.05614	0.162457	0.216635	0.648878	0.829491	0.98409	8.12924	0.0129728	0.226564	XP_021187939.1	protein grindelwald [Helicoverpa armigera]
MSTRG.362	HzChr01	7581948	7628800	3.03548	-0.169958	0.46187	0.507994	0.728233	0.452966	3.26229	0.0927457	0.436144	XP_021187931.1	period circadian protein isoform X6 [Helicoverpa armigera]
MSTRG.362	HzChr01	7581948	7628800	3.03548	-0.169958	0.46187	0.507994	0.728233	0.452966	3.26229	0.0927457	0.436144	XP_021187933.1	period circadian protein isoform X7 [Helicoverpa armigera]
MSTRG.362	HzChr01	7581948	7628800	3.03548	-0.169958	0.46187	0.507994	0.728233	0.452966	3.26229	0.0927457	0.436144	XP_021187934.1	period circadian protein isoform X8 [Helicoverpa armigera]
MSTRG.362	HzChr01	7581948	7628800	3.03548	-0.169958	0.46187	0.507994	0.728233	0.452966	3.26229	0.0927457	0.436144	XP_021187935.1	period circadian protein isoform X9 [Helicoverpa armigera]
MSTRG.362	HzChr01	7581948	7628800	3.03548	-0.169958	0.46187	0.507994	0.728233	0.452966	3.26229	0.0927457	0.436144	XP_021187938.1	period circadian protein isoform X12 [Helicoverpa armigera]
MSTRG.363	HzChr01	7599457	7600037	-1.14823	1.40731	0.494087	0.49392	0.716798	-0.771877	0.155135	0.699757	0.922961
MSTRG.364	HzChr01	7646505	7650693	3.83761	-0.0167376	0.00891956	0.926115	0.981612	-0.00523808	0.000867549	0.976924	1
MSTRG.365	HzChr01	7655369	7769211	0.159134	2.70873	17.3179	0.000988786	0.0115894	0.260575	0.186938	0.672158	0.913077
MSTRG.366	HzChr01	7663807	7664256	2.03589	-0.0697418	0.00232799	0.962216	0.994074	0.128606	0.00787588	0.930572	1
MSTRG.367	HzChr01	7715345	7715808	1.17616	-0.787293	0.890903	0.361634	0.598112	2.61007	7.78045	0.0147601	0.237644
MSTRG.368	HzChr01	7778846	7786225	2.10722	-0.175605	0.17708	0.680407	0.850492	1.2494	8.79456	0.0104061	0.213377	XP_021187925.1	dnaJ homolog subfamily C member 22 [Helicoverpa armigera]
MSTRG.369	HzChr01	7788162	7822454	2.06874	-0.271864	1.24202	0.28412	0.517725	0.351072	2.05215	0.174259	0.540882	XP_021187888.1	JNK-interacting protein 3 [Helicoverpa armigera]
MSTRG.370	HzChr01	7838179	7838791	0.478369	-0.877685	1.43461	0.251325	0.481233	-0.390499	0.296515	0.594828	0.877954
STRG.323	HzChr01	7952801	7953812	-1.95502	4.47612	2.33897	0.166381	0.365863	0	0	1	1
MSTRG.371	HzChr01	7976703	8049946	5.07151	-0.542354	11.9505	0.00392604	0.029819	-0.0076368	0.00237465	0.961833	1	XP_021187894.1	PAB-dependent poly(A)-specific ribonuclease subunit PAN3 [Helicoverpa armigera]
MSTRG.371	HzChr01	7976703	8049946	5.07151	-0.542354	11.9505	0.00392604	0.029819	-0.0076368	0.00237465	0.961833	1	XP_021187906.1	1-phosphatidylinositol 4,5-bisphosphate phosphodiesterase gamma-1 [Helicoverpa armigera]
MSTRG.371	HzChr01	7976703	8049946	5.07151	-0.542354	11.9505	0.00392604	0.029819	-0.0076368	0.00237465	0.961833	1	XP_021187946.1	nuclear pore complex protein Nup153-like [Helicoverpa armigera]
MSTRG.372	HzChr01	7997549	8006715	0.459483	-0.341005	0.953952	0.345531	0.582203	0.191609	0.283616	0.602813	0.880282
MSTRG.373	HzChr01	8006789	8010974	-1.3857	0.320781	0.0569013	0.814969	0.926829	0.624927	0.160788	0.694573	0.92164
MSTRG.374	HzChr01	8011884	8012882	2.9196	-11.6506	16.6884	0.00236229	0.0210931	-4.31693	5.8665	0.0367459	0.32321
MSTRG.375	HzChr01	8027196	8028940	-0.78981	0.0181271	0.00023322	0.988035	1	0.678509	0.317695	0.582059	0.873432
MSTRG.376	HzChr01	8051594	8061707	3.90849	0.146915	0.46001	0.508836	0.729037	-0.310322	2.04142	0.175314	0.541612
MSTRG.377	HzChr01	8062830	8145045	1.61286	-0.174752	0.392613	0.541159	0.755803	0.704616	6.47881	0.0235321	0.278117	XP_021187876.1	protein NDRG3 isoform X1 [Helicoverpa armigera]
MSTRG.378	HzChr01	8096534	8114744	1.65284	-1.60224	3.30045	0.0912688	0.251113	-0.107103	0.015519	0.902675	0.996573
MSTRG.379	HzChr01	8132249	8134509	0.842754	2.48229	18.3617	0.000780775	0.00979109	-0.00618688	0.000122003	0.991345	1
MSTRG.380	HzChr01	8152028	8154292	7.14132	-1.49703	15.925	0.00140378	0.0148088	-0.250027	0.462542	0.507805	0.834127
MSTRG.381	HzChr01	8166708	8212557	7.54048	-0.30882	4.43942	0.0539159	0.178869	-0.47836	10.6068	0.00583072	0.175015
MSTRG.382	HzChr01	8217330	8220955	0.312181	-0.254973	0.66007	0.430331	0.663249	0.415453	1.75673	0.206563	0.577921
MSTRG.383	HzChr01	8221939	8231324	2.2192	3.45421	201.798	1.2616e-09	3.2251e-06	0.360308	2.69635	0.123166	0.478098	XP_021187890.1	LOW QUALITY PROTEIN: locomotion-related protein Hikaru genki [Helicoverpa armigera]
MSTRG.385	HzChr01	8233767	8242099	1.70115	-2.28631	15.6006	0.00151937	0.0156463	-0.12242	0.0498376	0.826651	0.971178	XP_021190544.1	uncharacterized protein LOC110376405, partial [Helicoverpa armigera]
MSTRG.387	HzChr01	8245566	8247652	-1.21726	-0.361756	0.0701599	0.79502	0.916337	0.10224	0.00567515	0.941031	1
MSTRG.388	HzChr01	8247977	8251334	-0.23015	-0.0652355	0.033437	0.878937	0.958498	0.515425	2.09278	0.170332	0.537181	XP_021186050.1	uncharacterized protein LOC110373193 [Helicoverpa armigera]
MSTRG.389	HzChr01	8251946	8258822	2.97791	0.317109	2.08609	0.170971	0.372685	0.858116	15.5202	0.00152123	0.121676
MSTRG.391	HzChr01	8289116	8398424	7.15529	-0.482244	3.12971	0.099195	0.264187	0.718184	6.92759	0.0200339	0.262895	XP_021187891.1	titin-like, partial [Helicoverpa armigera]
MSTRG.391	HzChr01	8289116	8398424	7.15529	-0.482244	3.12971	0.099195	0.264187	0.718184	6.92759	0.0200339	0.262895	XP_021187959.1	titin [Helicoverpa armigera]
MSTRG.391	HzChr01	8289116	8398424	7.15529	-0.482244	3.12971	0.099195	0.264187	0.718184	6.92759	0.0200339	0.262895	XP_021193974.1	titin-like, partial [Helicoverpa armigera]
MSTRG.394	HzChr01	8405964	8411435	0.789293	0.138342	0.0596845	0.810593	0.92406	0.620637	1.2417	0.284191	0.66616
MSTRG.395	HzChr01	8425754	8437892	2.04539	0.0685596	0.149604	0.704815	0.864083	0.0845269	0.226978	0.641231	0.897631	XP_021193970.1	syntaxin-6 [Helicoverpa armigera]
MSTRG.396	HzChr01	8440951	8456408	4.75943	-0.0204918	0.00986072	0.922328	0.97976	-0.090004	0.189386	0.670158	0.911806	XP_021193965.1	exosome component 10 [Helicoverpa armigera]
MSTRG.397	HzChr01	8459778	8467832	1.31446	-0.897475	5.52953	0.0341073	0.131804	0.20156	0.288786	0.59956	0.879433	XP_021193980.1	discoidin domain-containing receptor tyrosine kinase B-like isoform X1 [Helicoverpa armigera]
MSTRG.397	HzChr01	8459778	8467832	1.31446	-0.897475	5.52953	0.0341073	0.131804	0.20156	0.288786	0.59956	0.879433	XP_021193981.1	discoidin domain-containing receptor tyrosine kinase B-like isoform X2 [Helicoverpa armigera]
MSTRG.398	HzChr01	8468565	8472858	0.956421	-0.829085	0.473172	0.503049	0.725156	0.313635	0.0692714	0.79633	0.960564
MSTRG.400	HzChr01	8505613	8511517	3.85413	-0.275356	4.09934	0.0627035	0.197318	-0.0246295	0.0327776	0.858964	0.98148
MSTRG.401	HzChr01	8514611	8552937	1.83069	-0.92028	2.10029	0.169845	0.370965	0.798244	1.62156	0.224125	0.599986	XP_021193993.1	bestrophin-4 isoform X1 [Helicoverpa armigera]
MSTRG.401	HzChr01	8514611	8552937	1.83069	-0.92028	2.10029	0.169845	0.370965	0.798244	1.62156	0.224125	0.599986	XP_021193994.1	bestrophin-4 isoform X2 [Helicoverpa armigera]
MSTRG.402	HzChr01	8556283	8571743	1.24144	0.322078	2.1277	0.167046	0.366704	0.134111	0.367076	0.55444	0.857618	XP_021193997.1	uncharacterized protein LOC110378894 isoform X2 [Helicoverpa armigera]
MSTRG.403	HzChr01	8563563	8650474	5.65406	0.072771	0.115771	0.738806	0.882822	-0.9385	18.9204	0.000692659	0.0938914	XP_021193999.1	peptidoglycan-recognition protein SD-like isoform X1 [Helicoverpa armigera]
MSTRG.403	HzChr01	8563563	8650474	5.65406	0.072771	0.115771	0.738806	0.882822	-0.9385	18.9204	0.000692659	0.0938914	XP_021194002.1	peptidoglycan-recognition protein SB2-like isoform X4 [Helicoverpa armigera]
MSTRG.403	HzChr01	8563563	8650474	5.65406	0.072771	0.115771	0.738806	0.882822	-0.9385	18.9204	0.000692659	0.0938914	XP_021194003.1	peptidoglycan-recognition protein SB2-like isoform X5 [Helicoverpa armigera]
MSTRG.404	HzChr01	8605284	8625719	2.38912	-0.0302527	0.0418499	0.840893	0.939438	0.299562	4.09235	0.0629013	0.389082	XP_021193968.1	cold shock domain-containing protein E1 isoform X1 [Helicoverpa armigera]
MSTRG.404	HzChr01	8605284	8625719	2.38912	-0.0302527	0.0418499	0.840893	0.939438	0.299562	4.09235	0.0629013	0.389082	XP_021193969.1	cold shock domain-containing protein E1 isoform X2 [Helicoverpa armigera]
MSTRG.405	HzChr01	8627922	8628690	-0.892015	2.0121	3.56349	0.0802777	0.23093	-0.0728749	0.00535765	0.942701	1	XP_021196531.1	uncharacterized protein LOC110380761 [Helicoverpa armigera]
MSTRG.406	HzChr01	8664470	8739279	1.71235	0.37616	1.22538	0.287235	0.521523	0.365774	1.17906	0.296156	0.678386
MSTRG.408	HzChr01	8759981	8784804	3.39445	-0.269416	2.19624	0.160825	0.358017	-0.0156495	0.00735656	0.932881	1
MSTRG.409	HzChr01	8773801	8774721	4.09393	-0.923525	1.25179	0.282507	0.515807	-1.08532	1.56909	0.231367	0.609193	XP_021197408.1	uncharacterized protein LOC110381406 [Helicoverpa armigera]
MSTRG.410	HzChr01	8785811	8824848	2.22288	-0.582954	6.82233	0.020688	0.0933887	0.353287	2.52309	0.134837	0.493831	XP_021193989.1	WD repeat-containing protein 47 isoform X1 [Helicoverpa armigera]
MSTRG.411	HzChr01	8825636	8901874	0.701058	-0.745033	3.93498	0.0675561	0.207011	0.00275727	5.48689e-05	0.994196	1	XP_021193986.1	uncharacterized protein LOC110378889 isoform X4 [Helicoverpa armigera]
MSTRG.412	HzChr01	8825805	8826103	5.40188	-3.71338	23.6131	0.000271248	0.00491164	-2.12679	8.94794	0.00994265	0.208237
MSTRG.413	HzChr01	8873176	8873810	0.258155	3.23737	11.7172	0.0042466	0.0314972	-0.685415	0.652806	0.432943	0.786921
MSTRG.414	HzChr01	8892294	8893074	4.43839	-3.73816	21.8709	0.00038061	0.00614312	0.979678	1.87842	0.192623	0.563294
MSTRG.415	HzChr01	8910844	8911761	1.42698	-2.90563	55.4783	3.39931e-06	0.000289947	-0.442582	1.39804	0.257029	0.635627
MSTRG.416	HzChr01	8931964	8932662	-0.577758	2.24644	3.44541	0.085005	0.239898	-2.00972	2.94097	0.108819	0.456485
MSTRG.417	HzChr01	8932233	8932523	0.614017	8.15022	13.1421	0.00364247	0.0284829	-0.897926	0.425037	0.527082	0.844699
MSTRG.418	HzChr01	8957475	8981350	1.77889	-0.31106	1.35686	0.263829	0.495455	0.0133261	0.00244617	0.961263	1	XP_021192913.1	DENN domain-containing protein 1A-like isoform X1 [Helicoverpa armigera]
MSTRG.418	HzChr01	8957475	8981350	1.77889	-0.31106	1.35686	0.263829	0.495455	0.0133261	0.00244617	0.961263	1	XP_021192914.1	DENN domain-containing protein 1A-like isoform X2 [Helicoverpa armigera]
STRG.373	HzChr01	8989212	8990899	-0.389062	0.821649	1.07891	0.316804	0.55333	1.8902	4.52586	0.0519205	0.364456
MSTRG.419	HzChr01	8992209	9000475	1.85954	0.21013	0.464547	0.506787	0.727388	-1.22583	15.5604	0.00150617	0.121676	XP_021192927.1	uncharacterized protein LOC110378129 isoform X1 [Helicoverpa armigera]
MSTRG.420	HzChr01	8997048	9027282	6.57683	0.368877	2.31784	0.15067	0.343915	0.0379187	0.0245716	0.877729	0.98963	XP_021187399.1	uncharacterized protein K02A2 6-like [Helicoverpa armigera]
MSTRG.420	HzChr01	8997048	9027282	6.57683	0.368877	2.31784	0.15067	0.343915	0.0379187	0.0245716	0.877729	0.98963	XP_021192921.1	uncharacterized protein LOC110378126 [Helicoverpa armigera]
MSTRG.421	HzChr01	9034800	9046764	-1.33826	0.266773	0.00901356	0.9268	0.981921	0	0	1	1
MSTRG.422	HzChr01	9087480	9091253	-0.502346	0.50121	1.07524	0.317597	0.553891	0.105935	0.0487335	0.828515	0.971622	XP_021192936.1	cyclic nucleotide-gated cation channel subunit A-like isoform X2 [Helicoverpa armigera]
MSTRG.423	HzChr01	9120745	9170809	1.84503	-0.24081	1.17875	0.296217	0.530382	0.191731	0.739816	0.404419	0.767019	XP_021192919.1	ankyrin repeat domain-containing protein SOWAHC isoform X2 [Helicoverpa armigera]
MSTRG.424	HzChr01	9148817	9151795	0.385047	1.21018	6.27437	0.0254409	0.107791	-0.170707	0.145936	0.70827	0.926213
MSTRG.425	HzChr01	9165340	9167626	-0.297497	-1.89018	0.81686	0.381768	0.617544	-0.808198	0.289667	0.599098	0.87935	XP_021198908.1	uncharacterized protein LOC110382591 [Helicoverpa armigera]
MSTRG.427	HzChr01	9217816	9277104	4.00444	-0.666029	17.652	0.00091543	0.0109511	0.0629647	0.159794	0.695466	0.921955	XP_021186240.1	tigger transposable element-derived protein 6-like [Helicoverpa armigera]
MSTRG.427	HzChr01	9217816	9277104	4.00444	-0.666029	17.652	0.00091543	0.0109511	0.0629647	0.159794	0.695466	0.921955	XP_021192924.1	homeobox protein araucan-like isoform X3 [Helicoverpa armigera]
MSTRG.428	HzChr01	9334537	9335312	0.371123	-0.20957	0.15984	0.695425	0.858357	0.227025	0.179899	0.677999	0.915533
MSTRG.429	HzChr01	9349234	9395952	1.74077	-0.189221	0.320488	0.580406	0.785014	0.379955	1.31149	0.271602	0.649708	XP_021192934.1	homeobox protein caupolican isoform X2 [Helicoverpa armigera]
MSTRG.430	HzChr01	9431553	9431825	5.88581	-5.00668	37.8151	2.81328e-05	0.0011336	-0.764182	1.22089	0.288274	0.670545
MSTRG.431	HzChr01	9435641	9452151	2.45191	-0.218542	1.92216	0.187616	0.395734	-0.187674	1.40826	0.255378	0.634331
MSTRG.432	HzChr01	9458403	9460481	0.410936	0.307554	0.381022	0.547109	0.761163	1.27244	6.4274	0.023996	0.279137	XP_021198719.1	E3 ubiquitin-protein ligase RNF4-like isoform X1 [Helicoverpa armigera]
MSTRG.433	HzChr01	9471698	9475048	-0.328408	1.909	2.71629	0.122122	0.301125	0.907678	0.613599	0.446802	0.797527
MSTRG.434	HzChr01	9475866	9480712	0.690667	-0.481524	3.32163	0.0901145	0.2489	0.460848	3.14565	0.0981929	0.445997
MSTRG.435	HzChr01	9494300	9494852	0.250121	6.64315	19.7424	0.00135991	0.0144874	0	0	1	1
MSTRG.436	HzChr01	9506614	9507066	0.823449	-1.53428	4.31116	0.0572513	0.185334	0.263388	0.132886	0.721042	0.931547
MSTRG.437	HzChr01	9643573	9643914	0.0159227	-5.53955	3.87177	0.0733583	0.218294	2.32553	1.45052	0.252332	0.630343
MSTRG.438	HzChr01	9726907	9727158	3.87746	-1.53529	5.83057	0.0304066	0.122294	0.204666	0.111543	0.743467	0.940794
MSTRG.439	HzChr01	9786885	9787380	1.4011	1.6358	1.05344	0.322555	0.55923	-0.132221	0.00713273	0.93392	1
MSTRG.440	HzChr01	9791745	9792550	-1.7029	-0.533115	0.0453981	0.834955	0.938006	-0.452793	0.0333347	0.858266	0.981341
MSTRG.442	HzChr01	9829109	9829310	4.93555	-0.81641	1.60801	0.225965	0.448919	0.286213	0.207311	0.656038	0.904722
MSTRG.443	HzChr01	9859211	9865270	1.79556	-0.516862	1.03562	0.326519	0.563331	0.583714	1.34216	0.266496	0.645093	XP_021193047.1	UDP-N-acetylglucosamine--peptide N-acetylglucosaminyltransferase 110 kDa subunit-like [Helicoverpa armigera]
MSTRG.444	HzChr01	9941578	9942572	1.03523	3.88133	4.91356	0.0473445	0.163144	-8.46089	10.6808	0.00697009	0.185142
MSTRG.445	HzChr01	9957827	9960936	-0.880402	5.59994	32.0222	0.000112843	0.0027761	0.516755	0.498956	0.493675	0.826702
MSTRG.446	HzChr01	9967751	9996681	0.834659	0.798957	5.73859	0.0313665	0.124533	0.336809	1.04278	0.324749	0.706319	XP_021193060.1	probable cytochrome P450 305a1 isoform X1 [Helicoverpa armigera]
MSTRG.448	HzChr01	10001497	10001886	2.62476	-6.02182	9.98331	0.00850113	0.0504426	-2.15152	1.83639	0.201056	0.572092
MSTRG.449	HzChr01	10003926	10011541	1.96191	0.238331	0.607594	0.44886	0.68077	0.39041	1.68093	0.216067	0.589873	XP_021193081.1	fork head domain-containing protein crocodile-like [Helicoverpa armigera]
MSTRG.447	HzChr01	10031701	9991777	5.92695	-0.190732	1.42049	0.253421	0.484102	0.0532288	0.11061	0.74445	0.940904	XP_021193036.1	staphylococcal nuclease domain-containing protein 1 [Helicoverpa armigera]
MSTRG.450	HzChr01	10045578	10049589	1.18516	-0.86851	9.33711	0.00867505	0.0513102	0.0891546	0.0980219	0.758899	0.945375	XP_021193073.1	uncharacterized protein LOC110378228 [Helicoverpa armigera]
MSTRG.451	HzChr01	10050928	10067888	4.49486	-0.744756	14.2704	0.00208812	0.0194423	-0.127439	0.418715	0.528199	0.845549	XP_021193038.1	carnitine O-palmitoyltransferase 1, liver isoform [Helicoverpa armigera]
MSTRG.452	HzChr01	10069352	10074185	1.116	-0.184836	0.698899	0.417398	0.650819	-0.208939	0.873158	0.36615	0.737147	XP_021193067.1	protein ABHD13 [Helicoverpa armigera]
MSTRG.453	HzChr01	10088878	10094638	-1.20221	1.96783	3.07397	0.126322	0.30687	1.37119	2.06417	0.173085	0.539669	XP_021193048.1	uncharacterized protein LOC110378210 [Helicoverpa armigera]
MSTRG.454	HzChr01	10099134	10129671	3.5518	-0.37331	3.46755	0.0840171	0.238014	0.517831	6.69056	0.0217289	0.27062	XP_021193049.1	uncharacterized protein LOC110378211 [Helicoverpa armigera]
MSTRG.456	HzChr01	10129680	10139562	0.878777	-0.430293	3.38605	0.087359	0.244044	-0.000942347	1.64439e-05	0.996823	1	XP_021193068.1	TBC1 domain family member 13 [Helicoverpa armigera]
MSTRG.457	HzChr01	10182853	10247337	3.58054	0.093083	0.0788381	0.783087	0.909094	-0.942129	7.7122	0.0151171	0.240851	XP_021193043.1	uncharacterized protein LOC110378206 isoform X4 [Helicoverpa armigera]
MSTRG.457	HzChr01	10182853	10247337	3.58054	0.093083	0.0788381	0.783087	0.909094	-0.942129	7.7122	0.0151171	0.240851	XP_021193045.1	uncharacterized protein LOC110378206 isoform X5 [Helicoverpa armigera]
MSTRG.458	HzChr01	10214188	10215521	0.837211	7.21287	38.2454	5.33548e-05	0.00169545	-0.788781	1.2689	0.282631	0.663951
MSTRG.459	HzChr01	10257743	10368226	5.86601	-0.462927	0.980828	0.339219	0.575652	0.500463	1.14885	0.302369	0.685351	XP_021188024.1	multidrug resistance protein homolog 49-like isoform X1 [Helicoverpa armigera]
MSTRG.459	HzChr01	10257743	10368226	5.86601	-0.462927	0.980828	0.339219	0.575652	0.500463	1.14885	0.302369	0.685351	XP_021188025.1	multidrug resistance protein homolog 49-like isoform X2 [Helicoverpa armigera]
MSTRG.459	HzChr01	10257743	10368226	5.86601	-0.462927	0.980828	0.339219	0.575652	0.500463	1.14885	0.302369	0.685351	XP_021188026.1	multidrug resistance protein homolog 49-like isoform X3 [Helicoverpa armigera]
MSTRG.459	HzChr01	10257743	10368226	5.86601	-0.462927	0.980828	0.339219	0.575652	0.500463	1.14885	0.302369	0.685351	XP_021188027.1	multidrug resistance protein homolog 49-like isoform X4 [Helicoverpa armigera]
MSTRG.459	HzChr01	10257743	10368226	5.86601	-0.462927	0.980828	0.339219	0.575652	0.500463	1.14885	0.302369	0.685351	XP_021188028.1	multidrug resistance protein homolog 49-like isoform X5 [Helicoverpa armigera]
MSTRG.459	HzChr01	10257743	10368226	5.86601	-0.462927	0.980828	0.339219	0.575652	0.500463	1.14885	0.302369	0.685351	XP_021193054.1	uncharacterized protein LOC110378215 isoform X1 [Helicoverpa armigera]
MSTRG.459	HzChr01	10257743	10368226	5.86601	-0.462927	0.980828	0.339219	0.575652	0.500463	1.14885	0.302369	0.685351	XP_021193055.1	uncharacterized protein LOC110378215 isoform X2 [Helicoverpa armigera]
MSTRG.460	HzChr01	10290682	10311698	1.23824	0.299707	1.20769	0.290598	0.524371	-0.469932	2.95755	0.107819	0.454443	XP_021193076.1	circadian locomoter output cycles protein kaput-like [Helicoverpa armigera]
MSTRG.461	HzChr01	10325916	10326130	-0.332779	1.62547	0.299743	0.599636	0.797853	0	0	1	1
MSTRG.462	HzChr01	10357633	10358624	0.593018	-6.06662	26.7159	0.00015432	0.00334016	0.559182	0.341984	0.568223	0.864951
MSTRG.463	HzChr01	10385004	10385261	4.55642	2.83686	10.3055	0.00646614	0.0418097	0.321679	0.152981	0.701737	0.923939
MSTRG.464	HzChr01	10399962	10400178	0.947937	2.62881	1.67871	0.21657	0.436134	-0.0974923	0.00227777	0.962626	1
MSTRG.465	HzChr01	10401466	10401889	-0.311076	-7.86503	3.07929	0.119064	0.296574	0	0	1	1
MSTRG.466	HzChr01	10467110	10468265	-1.18922	0.852626	0.136813	0.717143	0.87113	-2.46278	1.0632	0.320403	0.703714
MSTRG.467	HzChr01	10469212	10476586	2.78336	-0.108785	0.16216	0.693345	0.856524	-0.423618	2.45611	0.139711	0.499289	XP_021188037.1	dendritic arbor reduction protein 1-like isoform X3 [Helicoverpa armigera]
MSTRG.469	HzChr01	10483666	10486452	4.25786	-5.19692	15.6189	0.00151259	0.0156288	1.15857	1.05956	0.321203	0.704002	XP_021195248.1	uncharacterized protein LOC110379772 [Helicoverpa armigera]
MSTRG.470	HzChr01	10487852	10507313	3.93526	-0.755809	25.2289	0.000194868	0.00388687	-0.439317	8.50553	0.0114126	0.220722
MSTRG.471	HzChr01	10491665	10494660	-0.530994	-1.94211	6.60031	0.022477	0.0988097	-1.35886	3.3305	0.0897287	0.432311	XP_021187675.1	uncharacterized protein LOC110374331 [Helicoverpa armigera]
MSTRG.472	HzChr01	10502125	10506701	4.16581	0.21935	0.570796	0.462766	0.692164	-0.00977578	0.00114233	0.973527	1
MSTRG.473	HzChr01	10508429	10526824	3.32892	-0.318245	3.16736	0.0971503	0.260907	-0.0396746	0.0496151	0.826998	0.971256	XP_021188065.1	ankyrin repeat domain-containing protein 11 isoform X1 [Helicoverpa armigera]
MSTRG.473	HzChr01	10508429	10526824	3.32892	-0.318245	3.16736	0.0971503	0.260907	-0.0396746	0.0496151	0.826998	0.971256	XP_021188066.1	ankyrin repeat domain-containing protein 11 isoform X2 [Helicoverpa armigera]
MSTRG.473	HzChr01	10508429	10526824	3.32892	-0.318245	3.16736	0.0971503	0.260907	-0.0396746	0.0496151	0.826998	0.971256	XP_021188067.1	ankyrin repeat domain-containing protein 11 isoform X3 [Helicoverpa armigera]
MSTRG.473	HzChr01	10508429	10526824	3.32892	-0.318245	3.16736	0.0971503	0.260907	-0.0396746	0.0496151	0.826998	0.971256	XP_021188070.1	ankyrin repeat domain-containing protein 11 isoform X6 [Helicoverpa armigera]
MSTRG.474	HzChr01	10535608	10538948	1.24839	-0.153393	0.60294	0.450566	0.681564	0.371263	3.53852	0.0812313	0.420424
MSTRG.475	HzChr01	10538949	10547883	-0.553002	-0.303307	0.570236	0.462862	0.692164	0.36113	0.797938	0.387027	0.755465
MSTRG.476	HzChr01	10549638	10550548	-1.34286	-0.911112	0.203521	0.660172	0.83798	0.822345	0.156972	0.699117	0.922961
MSTRG.477	HzChr01	10554825	10557904	0.25508	-0.760684	0.926981	0.352326	0.589256	-0.994553	1.60111	0.226832	0.603753	XP_021188073.1	exosome complex component RRP41-like [Helicoverpa armigera]
MSTRG.478	HzChr01	10562320	10567141	0.167116	2.4183	1.16653	0.298823	0.533274	-0.779359	0.168289	0.688	0.919442	XP_021183539.1	uncharacterized protein LOC110371544 [Helicoverpa armigera]
MSTRG.479	HzChr01	10564963	10572270	-0.54069	0.451086	0.777389	0.393042	0.628905	0.111919	0.0503339	0.825772	0.970982
MSTRG.480	HzChr01	10568643	10568991	-0.280352	1.30581	0.57556	0.463124	0.692389	-2.86519	2.43499	0.145381	0.506348
MSTRG.481	HzChr01	10572488	10573661	-1.5618	2.0522	1.95313	0.184319	0.391176	-1.44563	0.946759	0.347297	0.722578
MSTRG.482	HzChr01	10581011	10590159	0.388923	0.0989029	0.0617262	0.807448	0.922703	0.443287	1.23232	0.285931	0.667584
MSTRG.483	HzChr01	10607340	10620090	3.60338	1.32551	11.3764	0.00469516	0.0335757	-0.068662	0.0314972	0.861741	0.982801	XP_021188002.1	proton-coupled folate transporter [Helicoverpa armigera]
MSTRG.484	HzChr01	10620794	10624212	0.844116	0.267897	1.2549	0.281741	0.515201	0.153445	0.405388	0.534741	0.84943
MSTRG.485	HzChr01	10625507	10637415	8.49993	-0.4613	8.08745	0.0131608	0.0693831	-0.512631	9.97469	0.00708424	0.185142
MSTRG.486	HzChr01	10772348	10773200	-0.0855272	5.82381	9.63788	0.00796085	0.0484045	0.14727	0.00898467	0.92586	1
MSTRG.487	HzChr01	10784488	10785457	0.263942	-3.17419	3.9703	0.066689	0.205471	-1.01356	0.394979	0.540064	0.852058
MSTRG.488	HzChr01	10788204	10789025	0.134418	3.54425	13.2688	0.00274924	0.0235273	0.0164419	0.000400115	0.984329	1	XP_021191701.1	uncharacterized protein LOC110377230 [Helicoverpa armigera]
MSTRG.489	HzChr01	10789482	10789981	4.28108	-6.66916	24.5376	0.000228146	0.0043821	-1.08563	1.16811	0.298508	0.680526	XP_021191701.1	uncharacterized protein LOC110377230 [Helicoverpa armigera]
MSTRG.490	HzChr01	10790556	10791643	0.77559	5.20962	42.8839	1.39561e-05	0.000728451	0.749203	1.80305	0.201037	0.572092
MSTRG.491	HzChr01	10796916	10797969	0.111257	2.98112	25.7294	0.00017796	0.00365105	-0.411872	0.680943	0.423301	0.78058
MSTRG.492	HzChr01	10818791	10819044	2.0552	5.94305	15.1946	0.00223335	0.0203921	-0.61507	0.576049	0.462938	0.807262
MSTRG.493	HzChr01	10858049	10930861	6.69291	-1.30794	28.4119	0.000114744	0.00280162	-1.37393	31.114	7.4077e-05	0.0436549	XP_021188031.1	sodium/potassium/calcium exchanger 3-like [Helicoverpa armigera]
MSTRG.494	HzChr01	10878985	10921557	2.37948	-1.08911	10.5872	0.00586548	0.0391384	-0.247929	0.563029	0.465647	0.80929	XP_021188053.1	calcitonin gene-related peptide type 1 receptor-like isoform X1 [Helicoverpa armigera]
MSTRG.494	HzChr01	10878985	10921557	2.37948	-1.08911	10.5872	0.00586548	0.0391384	-0.247929	0.563029	0.465647	0.80929	XP_021188054.1	calcitonin gene-related peptide type 1 receptor-like isoform X2 [Helicoverpa armigera]
MSTRG.495	HzChr01	10932043	10932311	4.11599	0.437768	0.0992806	0.757458	0.893417	-0.377364	0.0772067	0.785282	0.957272
MSTRG.496	HzChr01	10933700	10933994	1.63624	-4.18355	6.22674	0.0260645	0.109678	0.663587	0.227753	0.640743	0.897316
MSTRG.497	HzChr01	10937209	10937909	-0.812571	-1.70212	0.851353	0.372186	0.60839	-1.11313	0.342376	0.568004	0.864951
MSTRG.498	HzChr01	10947897	10948161	1.68347	-9.24919	3.95151	0.0759091	0.223322	-1.70544	0.39864	0.542449	0.853137
MSTRG.499	HzChr01	10950487	10966389	1.16085	0.63728	6.99892	0.0193828	0.0893605	0.0342197	0.0199005	0.889854	0.993719	XP_021188041.1	peptidoglycan-recognition protein LA-like isoform X1 [Helicoverpa armigera]
MSTRG.500	HzChr01	10968165	10973860	2.64301	-0.241617	1.48648	0.243197	0.470957	-0.00975299	0.00240581	0.961583	1
MSTRG.501	HzChr01	11045553	11045833	-0.371581	6.47285	2.90105	0.120431	0.29872	-0.87482	0.113018	0.743925	0.940794
MSTRG.502	HzChr01	11150974	11151891	1.61874	0.713456	1.72767	0.210285	0.427662	1.08452	4.80961	0.0460835	0.349399	XP_021192776.1	protein split ends-like [Helicoverpa armigera]
MSTRG.503	HzChr01	11243352	11271430	2.18339	-0.459874	0.438619	0.518811	0.737462	0.725282	1.115	0.309323	0.691835	XP_021188057.1	potassium voltage-gated channel protein Shaker isoform X3 [Helicoverpa armigera]
MSTRG.504	HzChr01	11270145	11278566	-0.416481	4.77185	23.5026	0.00026909	0.00487937	0.25094	0.100096	0.75645	0.945158	XP_021201745.1	uncharacterized protein LOC110384665 [Helicoverpa armigera]
MSTRG.505	HzChr01	11288434	11292150	-0.408149	-0.450281	0.884158	0.363238	0.598929	0.514657	1.17919	0.296129	0.678386
MSTRG.506	HzChr01	11299404	11299730	4.52247	-1.43086	2.16391	0.16395	0.362671	0.245239	0.0661712	0.800831	0.962929
MSTRG.507	HzChr01	11301805	11313200	3.11943	-0.371249	5.22822	0.0385679	0.142948	0.0836486	0.264756	0.615015	0.887285	XP_021188008.1	protein angel homolog 1-like isoform X1 [Helicoverpa armigera]
MSTRG.507	HzChr01	11301805	11313200	3.11943	-0.371249	5.22822	0.0385679	0.142948	0.0836486	0.264756	0.615015	0.887285	XP_021188009.1	protein angel homolog 1-like isoform X2 [Helicoverpa armigera]
MSTRG.507	HzChr01	11301805	11313200	3.11943	-0.371249	5.22822	0.0385679	0.142948	0.0836486	0.264756	0.615015	0.887285	XP_021188011.1	protein angel homolog 1-like isoform X4 [Helicoverpa armigera]
MSTRG.510	HzChr01	11330761	11336804	0.61738	1.09078	10.9772	0.00521586	0.0361431	-0.372271	1.41238	0.254716	0.633736	XP_021188021.1	uncharacterized protein LOC110374583 [Helicoverpa armigera]
MSTRG.511	HzChr01	11336938	11337682	-1.92986	-5.19374	2.40385	0.16132	0.358689	0	0	1	1
MSTRG.512	HzChr01	11342285	11342503	-0.287357	0	0	1	1	2.99235	1.92101	0.204776	0.575974
MSTRG.520	HzChr01	11383024	11388932	0.388869	-0.260381	0.887667	0.362316	0.598398	0.0861485	0.0965991	0.760596	0.946205
MSTRG.521	HzChr01	11404182	11446763	0.651494	0.047162	0.0152106	0.948634	0.989703	0.859386	5.26253	0.0380268	0.32824	XP_021188022.1	proton-coupled amino acid transporter-like protein CG1139 [Helicoverpa armigera]
MSTRG.522	HzChr01	11413158	11458552	4.1209	-0.867191	1.73335	0.209654	0.426776	-0.663561	0.9966	0.335497	0.714951	XP_021188039.1	E3 ubiquitin-protein ligase UHRF1-like [Helicoverpa armigera]
MSTRG.523	HzChr01	11459523	11472879	2.13394	-0.399221	1.15906	0.300126	0.535085	-1.17651	9.95363	0.00713109	0.185142	XP_021188030.1	Y+L amino acid transporter 2 [Helicoverpa armigera]
MSTRG.524	HzChr01	11473451	11476926	0.408966	-0.916145	3.66488	0.0765408	0.224514	0.134262	0.0788494	0.78303	0.956087	XP_021188034.1	uncharacterized protein LOC110374593 [Helicoverpa armigera]
MSTRG.525	HzChr01	11478613	11502322	2.04566	-0.121276	0.1109	0.744128	0.885997	0.615256	2.84804	0.113951	0.46371	XP_021188045.1	serine/threonine-protein kinase tricorner isoform X1 [Helicoverpa armigera]
MSTRG.525	HzChr01	11478613	11502322	2.04566	-0.121276	0.1109	0.744128	0.885997	0.615256	2.84804	0.113951	0.46371	XP_021188046.1	serine/threonine-protein kinase tricorner isoform X2 [Helicoverpa armigera]
MSTRG.526	HzChr01	11488746	11489364	0.904478	0.464347	0.23601	0.634806	0.820519	-0.00325478	1.24407e-05	0.997237	1
MSTRG.528	HzChr01	11510722	11511230	0.39606	-9.05877	8.31273	0.0213817	0.0955582	-1.48248	0.571726	0.472196	0.81419
MSTRG.530	HzChr01	11537249	11537468	-0.448552	7.92728	10.1477	0.0136519	0.0711404	-0.324585	0.0379656	0.850583	0.978337
MSTRG.532	HzChr01	11575008	11575817	-1.38433	4.89177	2.37941	0.149646	0.342542	-1.13931	0.202464	0.660993	0.907046
MSTRG.534	HzChr01	11580357	11587748	1.74785	0.407944	4.4648	0.0533208	0.177348	0.30704	2.56348	0.131999	0.489661	XP_021199192.1	nitrogen permease regulator 2-like protein [Helicoverpa armigera]
MSTRG.535	HzChr01	11588307	11631159	0.77983	2.03505	10.5016	0.00605119	0.0398444	0.281448	0.213064	0.651602	0.902572	XP_021199193.1	proton-coupled amino acid transporter-like protein CG1139 [Helicoverpa armigera]
MSTRG.536	HzChr01	11622615	11775762	5.22495	-0.166134	1.56282	0.232042	0.456481	0.197611	2.20229	0.160289	0.52638	XP_021194681.1	coatomer subunit beta' isoform X1 [Helicoverpa armigera]
MSTRG.536	HzChr01	11622615	11775762	5.22495	-0.166134	1.56282	0.232042	0.456481	0.197611	2.20229	0.160289	0.52638	XP_021194683.1	coatomer subunit beta' isoform X2 [Helicoverpa armigera]
MSTRG.536	HzChr01	11622615	11775762	5.22495	-0.166134	1.56282	0.232042	0.456481	0.197611	2.20229	0.160289	0.52638	XP_021194691.1	transcription initiation factor TFIID subunit 4 isoform X1 [Helicoverpa armigera]
MSTRG.536	HzChr01	11622615	11775762	5.22495	-0.166134	1.56282	0.232042	0.456481	0.197611	2.20229	0.160289	0.52638	XP_021194692.1	transcription initiation factor TFIID subunit 4 isoform X2 [Helicoverpa armigera]
MSTRG.536	HzChr01	11622615	11775762	5.22495	-0.166134	1.56282	0.232042	0.456481	0.197611	2.20229	0.160289	0.52638	XP_021194693.1	transcription initiation factor TFIID subunit 4 isoform X3 [Helicoverpa armigera]
MSTRG.536	HzChr01	11622615	11775762	5.22495	-0.166134	1.56282	0.232042	0.456481	0.197611	2.20229	0.160289	0.52638	XP_021194694.1	transcription initiation factor TFIID subunit 4 isoform X4 [Helicoverpa armigera]
MSTRG.536	HzChr01	11622615	11775762	5.22495	-0.166134	1.56282	0.232042	0.456481	0.197611	2.20229	0.160289	0.52638	XP_021194695.1	transcription initiation factor TFIID subunit 4 isoform X5 [Helicoverpa armigera]
MSTRG.536	HzChr01	11622615	11775762	5.22495	-0.166134	1.56282	0.232042	0.456481	0.197611	2.20229	0.160289	0.52638	XP_021194708.1	protein furry [Helicoverpa armigera]
MSTRG.537	HzChr01	11667645	11674857	5.11098	-0.735585	2.92646	0.109748	0.282094	-0.0763524	0.0320854	0.860471	0.982043
MSTRG.538	HzChr01	11675217	11687931	2.5874	1.39979	12.7433	0.00317097	0.025905	0.0715787	0.0357613	0.85278	0.978985
MSTRG.539	HzChr01	11679089	11712039	3.79882	0.25822	1.66879	0.217641	0.437612	-0.0956109	0.229659	0.639284	0.896499	XP_021187675.1	uncharacterized protein LOC110374331 [Helicoverpa armigera]
MSTRG.539	HzChr01	11679089	11712039	3.79882	0.25822	1.66879	0.217641	0.437612	-0.0956109	0.229659	0.639284	0.896499	XP_021194709.1	H(+)/Cl(-) exchange transporter 5 [Helicoverpa armigera]
MSTRG.540	HzChr01	11776028	11781743	-1.12895	-0.378737	0.293663	0.596527	0.796249	0.959872	1.76066	0.206084	0.577705
MSTRG.541	HzChr01	11786989	11797559	1.20309	2.31114	16.6708	0.00116221	0.0131599	1.08608	4.0643	0.0638036	0.39051
MSTRG.542	HzChr01	11799179	11805383	2.20678	0.397108	0.254368	0.622056	0.81169	-1.17668	2.14938	0.165274	0.53281
MSTRG.543	HzChr01	11818608	11826067	1.56173	0.60586	0.407658	0.533723	0.748806	-1.17874	1.48098	0.244236	0.623393	XP_021194697.1	protein henna [Helicoverpa armigera]
MSTRG.544	HzChr01	11853124	11853445	2.22398	-0.439896	0.183693	0.674902	0.847082	-1.47923	2.03992	0.175689	0.542016
MSTRG.545	HzChr01	11884365	11910320	2.23557	-0.827688	14.9702	0.00174554	0.0171404	0.0436632	0.0422244	0.840194	0.974688	XP_021194680.1	G-protein-signaling modulator 2 [Helicoverpa armigera]
MSTRG.546	HzChr01	11908239	11908764	-1.95737	-0.149509	0.00353792	0.953577	0.992158	-3.35729	1.27609	0.28134	0.662472
MSTRG.547	HzChr01	11910861	11911169	2.37168	4.13297	7.08771	0.0211535	0.0946685	0.878318	0.393441	0.542589	0.853137
MSTRG.548	HzChr01	11911392	11968364	1.64024	-0.33983	3.5011	0.0826863	0.235507	0.152728	0.696536	0.418167	0.777727	XP_021194688.1	protein cycle isoform X5 [Helicoverpa armigera]
MSTRG.548	HzChr01	11911392	11968364	1.64024	-0.33983	3.5011	0.0826863	0.235507	0.152728	0.696536	0.418167	0.777727	XP_021194690.1	protein cycle isoform X7 [Helicoverpa armigera]
MSTRG.549	HzChr01	11916419	11916755	1.72868	3.04429	7.00533	0.0194712	0.0895836	0.615812	0.413414	0.530891	0.846532
MSTRG.551	HzChr01	11955558	11973765	5.4187	-0.698811	39.2207	2.22482e-05	0.000967948	-0.0277841	0.06244	0.806362	0.964412	XP_021194701.1	OCIA domain-containing protein 1-like [Helicoverpa armigera]
MSTRG.552	HzChr01	11981576	12093869	3.46594	-0.400517	4.55057	0.0513662	0.172887	-0.466502	6.09791	0.0272351	0.289659	XP_021193003.1	hepatic leukemia factor-like isoform X2 [Helicoverpa armigera]
MSTRG.552	HzChr01	11981576	12093869	3.46594	-0.400517	4.55057	0.0513662	0.172887	-0.466502	6.09791	0.0272351	0.289659	XP_021193004.1	hepatic leukemia factor-like isoform X3 [Helicoverpa armigera]
MSTRG.552	HzChr01	11981576	12093869	3.46594	-0.400517	4.55057	0.0513662	0.172887	-0.466502	6.09791	0.0272351	0.289659	XP_021193005.1	hepatic leukemia factor-like isoform X4 [Helicoverpa armigera]
MSTRG.552	HzChr01	11981576	12093869	3.46594	-0.400517	4.55057	0.0513662	0.172887	-0.466502	6.09791	0.0272351	0.289659	XP_021193006.1	hepatic leukemia factor-like isoform X5 [Helicoverpa armigera]
MSTRG.553	HzChr01	12027135	12027607	1.93826	0.0455521	0.00117737	0.973124	0.996488	-1.39523	1.05198	0.322878	0.704733
MSTRG.554	HzChr01	12074782	12094673	2.83448	-0.58929	1.15355	0.30142	0.536685	-1.03626	3.53627	0.0815395	0.420844
MSTRG.555	HzChr01	12095567	12096947	-0.498953	0.760173	1.10951	0.310288	0.546396	1.09277	2.3707	0.146248	0.507164
MSTRG.556	HzChr01	12101949	12102658	-1.54644	0.106581	0.00154799	0.969417	0.995755	-6.25405	3.01603	0.114173	0.464019
MSTRG.557	HzChr01	12131849	12146668	2.29142	0.0284052	0.0420617	0.840497	0.939413	-0.143396	1.06734	0.319317	0.702408
MSTRG.558	HzChr01	12147118	12147553	1.6605	9.88326	20.9546	0.000684028	0.00893094	1.92711	2.30006	0.156012	0.52083
MSTRG.559	HzChr01	12152432	12152833	0.400022	-0.612256	0.182437	0.675945	0.847464	1.22943	0.773451	0.394365	0.760246
MSTRG.560	HzChr01	12198258	12198898	0.736544	-3.05161	3.51198	0.0824821	0.235044	-0.124077	0.00712838	0.93394	1
MSTRG.561	HzChr01	12199170	12199502	1.67326	-9.81895	5.83016	0.0331882	0.129215	-0.702272	0.0932732	0.765442	0.948571
MSTRG.567	HzChr01	12262263	12270700	1.78031	0.478338	4.2761	0.0579401	0.186849	0.301041	1.72575	0.210381	0.581699	XP_021193029.1	chondroitin sulfate proteoglycan 4 [Helicoverpa armigera]
MSTRG.568	HzChr01	12274106	12278467	-0.515723	6.1189	2.81035	0.125679	0.306001	2.09526	0.617199	0.450938	0.800823
MSTRG.569	HzChr01	12294532	12325564	1.36072	1.06686	8.10393	0.0130863	0.0691939	-0.747541	4.04056	0.0643897	0.392331
MSTRG.570	HzChr01	12323343	12323888	1.99451	-0.315844	0.0336734	0.8571	0.948057	0.0778139	0.00181371	0.966647	1
MSTRG.571	HzChr01	12334377	12477919	3.08056	-0.225441	0.614004	0.446533	0.678937	0.0967653	0.11356	0.7412	0.940187	XP_021193023.1	basement membrane-specific heparan sulfate proteoglycan core protein-like isoform X2 [Helicoverpa armigera]
MSTRG.571	HzChr01	12334377	12477919	3.08056	-0.225441	0.614004	0.446533	0.678937	0.0967653	0.11356	0.7412	0.940187	XP_021193024.1	basement membrane-specific heparan sulfate proteoglycan core protein-like isoform X3 [Helicoverpa armigera]
MSTRG.571	HzChr01	12334377	12477919	3.08056	-0.225441	0.614004	0.446533	0.678937	0.0967653	0.11356	0.7412	0.940187	XP_021193025.1	basement membrane-specific heparan sulfate proteoglycan core protein-like isoform X4 [Helicoverpa armigera]
MSTRG.571	HzChr01	12334377	12477919	3.08056	-0.225441	0.614004	0.446533	0.678937	0.0967653	0.11356	0.7412	0.940187	XP_021193026.1	basement membrane-specific heparan sulfate proteoglycan core protein-like isoform X5 [Helicoverpa armigera]
MSTRG.572	HzChr01	12420917	12421557	1.27148	-1.07439	3.53479	0.0815493	0.2335	-0.800483	1.96244	0.183518	0.552557
MSTRG.573	HzChr01	12488399	12536590	4.99984	0.313325	0.903776	0.358295	0.59494	0.448376	1.86734	0.193859	0.564865	XP_021192994.1	PDF receptor-like, partial [Helicoverpa armigera]
MSTRG.574	HzChr01	12507559	12513805	0.855121	-1.35617	7.78301	0.0146304	0.0742983	-0.113066	0.0573512	0.814254	0.966855	XP_021192999.1	TPPP family protein CG45057-like [Helicoverpa armigera]
MSTRG.575	HzChr01	12539185	12553177	5.92096	-0.583254	9.43718	0.00839997	0.0500635	-1.07561	31.4652	6.79922e-05	0.0419771	XP_021192996.1	solute carrier family 35 member B1 homolog isoform X2 [Helicoverpa armigera]
MSTRG.575	HzChr01	12539185	12553177	5.92096	-0.583254	9.43718	0.00839997	0.0500635	-1.07561	31.4652	6.79922e-05	0.0419771	XP_021199800.1	uncharacterized protein LOC110383345 isoform X3 [Helicoverpa armigera]
MSTRG.576	HzChr01	12566637	12567927	0.0749439	0.146118	0.126835	0.727123	0.876129	0.0543409	0.0181579	0.894755	0.994129
MSTRG.577	HzChr01	12588938	12592689	1.97674	-1.7251	58.0893	2.6235e-06	0.000248275	-0.160922	0.530226	0.478689	0.81784
MSTRG.578	HzChr01	12604207	12607558	0.472541	1.74199	15.8504	0.00140253	0.0148077	-0.185526	0.215214	0.649946	0.902214	XP_021197680.1	uncharacterized protein LOC110381641 isoform X2 [Helicoverpa armigera]
MSTRG.579	HzChr01	12656808	12657580	0.653633	7.31611	91.8418	6.4931e-07	0.000104418	-0.179779	0.151293	0.704233	0.924782
MSTRG.580	HzChr01	12667513	12668302	0.197256	0.107569	0.0285628	0.868245	0.953158	-0.111402	0.0351252	0.854062	0.979494
MSTRG.581	HzChr01	12670442	12670674	1.9184	-0.974029	1.00419	0.333726	0.571136	-1.80846	3.39347	0.0872722	0.427944
MSTRG.582	HzChr01	12673351	12674400	0.110867	-0.201689	0.0967827	0.760376	0.895235	-0.255685	0.165645	0.690255	0.920047
MSTRG.583	HzChr01	12679266	12680813	1.14478	1.8127	31.1679	7.12417e-05	0.0020897	-0.722185	5.58834	0.0333089	0.311395
MSTRG.584	HzChr01	12701766	12717091	1.80142	0.368042	0.308062	0.587849	0.789625	0.351127	0.280875	0.604639	0.881012
MSTRG.585	HzChr01	12729434	12729769	1.7371	2.68964	5.38471	0.0363466	0.137682	-0.17166	0.025568	0.875301	0.988551
MSTRG.586	HzChr01	12756642	12825603	-1.10262	-0.74175	0.880645	0.364164	0.599998	2.39455	8.24549	0.0124658	0.224471
MSTRG.587	HzChr01	12761326	12762798	0.0908512	-0.593531	1.74815	0.207612	0.423821	0.013899	0.00103072	0.974848	1
MSTRG.588	HzChr01	12777321	12807020	-0.613925	-0.311513	0.0673386	0.799085	0.918534	2.02534	3.40213	0.0866955	0.427348	XP_021190849.1	uncharacterized protein LOC110376622 [Helicoverpa armigera]
MSTRG.589	HzChr01	12829363	12841934	1.29464	-0.486967	2.41009	0.143187	0.333051	0.390835	1.56514	0.231713	0.609533	XP_021190864.1	coiled-coil domain-containing protein AGAP005037 [Helicoverpa armigera]
MSTRG.590	HzChr01	12848796	12851478	-0.224044	-0.0951375	0.0207035	0.88767	0.963308	0.895658	1.92033	0.187813	0.557871
MSTRG.592	HzChr01	12925958	12926585	1.6891	-1.1086	1.33468	0.26779	0.499898	-0.561458	0.347317	0.565259	0.86371
MSTRG.594	HzChr01	13126056	13150000	3.22469	0.190989	0.772019	0.394638	0.630031	0.402112	3.416	0.0861126	0.427348	XP_021190846.1	CCR4-NOT transcription complex subunit 1 isoform X1 [Helicoverpa armigera]
MSTRG.594	HzChr01	13126056	13150000	3.22469	0.190989	0.772019	0.394638	0.630031	0.402112	3.416	0.0861126	0.427348	XP_021190847.1	CCR4-NOT transcription complex subunit 1 isoform X2 [Helicoverpa armigera]
MSTRG.595	HzChr01	13151093	13152340	9.50218	-0.143729	0.491592	0.494875	0.717822	-0.364484	3.15378	0.0978011	0.445378
MSTRG.596	HzChr01	13154390	13155413	1.51717	-0.798115	5.33883	0.036855	0.138571	0.489545	2.04981	0.174488	0.541077
MSTRG.597	HzChr01	13155709	13155949	3.86929	2.42234	11.8083	0.0041446	0.0310426	-2.20807	10.068	0.0069572	0.185142
MSTRG.598	HzChr01	13156887	13157479	2.48825	6.35113	53.4903	4.42602e-06	0.000363186	-0.175944	0.0745033	0.788974	0.957908
MSTRG.599	HzChr01	13158040	13169111	3.76367	-0.419831	6.80682	0.0208075	0.0936546	-0.392985	5.93368	0.0290389	0.297232
MSTRG.600	HzChr01	13169781	13174796	-0.108209	-0.532515	1.93593	0.18614	0.393559	0.122735	0.102734	0.753376	0.943904
MSTRG.601	HzChr01	13177592	13208413	-1.55802	-1.08562	0.241284	0.63705	0.821715	0	0	1	1
MSTRG.603	HzChr01	13215243	13215509	3.12997	-3.04422	5.19725	0.0422995	0.151999	1.4935	1.29301	0.278332	0.658619
MSTRG.604	HzChr01	13267444	13269050	1.51338	-2.12328	25.4598	0.000186849	0.00378516	-0.83703	4.26015	0.0583518	0.379594
MSTRG.605	HzChr01	13271040	13271317	1.13795	-10.4952	10.5686	0.0124064	0.0664667	-0.649192	0.117688	0.740784	0.94012
MSTRG.606	HzChr01	13286214	13292779	1.01729	0.070626	0.0366931	0.850882	0.944331	0.893904	6.02205	0.0280515	0.292825
MSTRG.607	HzChr01	13311416	13311737	-0.195984	-0.378242	0.0451087	0.834942	0.938006	0.89174	0.23463	0.635788	0.895297
MSTRG.609	HzChr01	13337858	13338675	1.98605	-3.48682	8.15416	0.012971	0.0686683	-0.914634	0.681704	0.423191	0.78058
MSTRG.611	HzChr01	13404137	13407961	-1.36066	-0.447464	0.134342	0.719532	0.871925	-1.15868	0.786964	0.390222	0.757843
MSTRG.612	HzChr01	13408669	13410671	1.31737	0.201044	0.314095	0.584165	0.787062	-0.54047	2.12083	0.167686	0.535098
MSTRG.613	HzChr01	13490716	13512874	4.04557	-0.258747	5.59055	0.0332793	0.129492	0.0398565	0.132822	0.721048	0.931547	XP_021195515.1	large proline-rich protein BAG6 isoform X1 [Helicoverpa armigera]
MSTRG.613	HzChr01	13490716	13512874	4.04557	-0.258747	5.59055	0.0332793	0.129492	0.0398565	0.132822	0.721048	0.931547	XP_021195516.1	large proline-rich protein BAG6 isoform X2 [Helicoverpa armigera]
MSTRG.614	HzChr01	13499031	13538020	0.735473	-0.661363	0.130308	0.723636	0.874166	-1.12454	0.351198	0.563121	0.862885
MSTRG.615	HzChr01	13535030	13617965	0.912563	-0.251481	1.30752	0.272298	0.504705	0.373996	2.8885	0.111637	0.459339	XP_021195502.1	protein zer-1 homolog [Helicoverpa armigera]
MSTRG.617	HzChr01	13574313	13588975	6.49734	-1.44454	16.1618	0.00132577	0.0142526	-0.325242	0.848958	0.372839	0.742757
MSTRG.618	HzChr01	13620563	13620856	0.334082	1.03639	0.23711	0.634024	0.820519	2.38423	1.24131	0.284445	0.666165
MSTRG.619	HzChr01	13643588	13644107	2.79571	-1.20997	1.52796	0.237259	0.463612	0.048517	0.00262544	0.959877	1
MSTRG.620	HzChr01	13651485	13656774	0.800695	0.520036	0.657026	0.431442	0.664249	-0.778757	1.62652	0.223349	0.599527
MSTRG.621	HzChr01	13656775	13657447	2.2066	0.629224	0.821481	0.380463	0.615974	-0.160045	0.0579967	0.813269	0.966855
MSTRG.622	HzChr01	13662757	13674709	2.53978	1.1035	10.1583	0.00669772	0.0429668	1.23934	12.7561	0.00313574	0.140674	XP_021187583.1	uncharacterized protein LOC110374259 [Helicoverpa armigera]
MSTRG.623	HzChr01	13666039	13671124	6.06309	-0.380797	3.64887	0.0771187	0.225671	-0.599836	8.98871	0.00971824	0.207232
MSTRG.624	HzChr01	13674577	13680115	4.01951	0.84619	13.8162	0.00235188	0.0210581	0.562433	6.25207	0.0256599	0.285617
MSTRG.625	HzChr01	13681146	13683596	4.91194	0.0444905	0.0842835	0.775892	0.905398	0.598103	15.1938	0.00165002	0.124986
MSTRG.626	HzChr01	13684841	13717355	3.5802	0.176335	0.539402	0.474979	0.701574	-0.0318523	0.0175987	0.896377	0.994483	XP_021187508.1	ecotropic viral integration site 5 ortholog isoform X1 [Helicoverpa armigera]
MSTRG.626	HzChr01	13684841	13717355	3.5802	0.176335	0.539402	0.474979	0.701574	-0.0318523	0.0175987	0.896377	0.994483	XP_021187511.1	ecotropic viral integration site 5 ortholog isoform X4 [Helicoverpa armigera]
MSTRG.626	HzChr01	13684841	13717355	3.5802	0.176335	0.539402	0.474979	0.701574	-0.0318523	0.0175987	0.896377	0.994483	XP_021187512.1	ecotropic viral integration site 5 ortholog isoform X5 [Helicoverpa armigera]
MSTRG.626	HzChr01	13684841	13717355	3.5802	0.176335	0.539402	0.474979	0.701574	-0.0318523	0.0175987	0.896377	0.994483	XP_021187513.1	ecotropic viral integration site 5 ortholog isoform X6 [Helicoverpa armigera]
MSTRG.627	HzChr01	13729511	13734881	3.42849	0.368257	0.998624	0.335023	0.572201	1.20113	10.2015	0.00667626	0.185142
MSTRG.628	HzChr01	13775672	13776397	-0.754026	0.604282	0.293187	0.596821	0.796332	1.66723	2.25188	0.155986	0.52083
MSTRG.629	HzChr01	13779824	13781070	0.242205	-0.478558	1.19548	0.29295	0.526782	0.429297	0.975248	0.340378	0.71821
MSTRG.631	HzChr01	13825786	13826380	-0.89014	4.57292	5.57306	0.0365737	0.138204	6.20551	7.19072	0.0204213	0.26397	XP_021189393.1	disks large-associated protein 5 [Helicoverpa armigera]
MSTRG.632	HzChr01	13909465	13916496	0.654981	-0.357241	2.15324	0.164693	0.363693	0.268367	1.21982	0.288285	0.670545
MSTRG.633	HzChr01	13916869	13921345	0.993188	-0.0988351	0.146091	0.708122	0.86546	0.285461	1.21486	0.289228	0.671413
MSTRG.634	HzChr01	13921346	13923699	2.34138	0.0860068	0.0626042	0.806114	0.921967	-0.190413	0.313687	0.584406	0.874222
MSTRG.636	HzChr01	13927977	13928842	-0.167485	3.21498	11.6708	0.00425456	0.0315231	-0.0907866	0.0132963	0.909861	0.999081
STRG.554	HzChr01	13949978	13950531	-1.61207	-5.08135	2.76583	0.122929	0.30224	1.94379	0.599537	0.454175	0.801956	XP_021187562.1	voltage-gated potassium channel subunit beta-2 isoform X4 [Helicoverpa armigera]
MSTRG.637	HzChr01	13954827	13961282	0.276417	-0.446757	0.76431	0.396946	0.632314	0.777649	2.49732	0.136687	0.495335
MSTRG.639	HzChr01	13990172	13990416	3.9677	0.670975	0.453899	0.511732	0.731262	-0.57689	0.338499	0.570177	0.86622
MSTRG.640	HzChr01	13995624	14010930	2.182	-0.814156	1.08324	0.316051	0.552684	-1.58807	3.90427	0.0687255	0.396248	XP_021187582.1	sodium/potassium/calcium exchanger 4-like [Helicoverpa armigera]
MSTRG.641	HzChr01	14014923	14026671	4.64423	-0.0596788	0.101556	0.754743	0.891675	-0.445611	5.67388	0.0321864	0.308003	XP_021187610.1	dentin sialophosphoprotein [Helicoverpa armigera]
MSTRG.642	HzChr01	14027178	14028385	-1.44695	7.08586	11.9514	0.00485668	0.0344728	3.87454	4.72199	0.0508956	0.362705
MSTRG.643	HzChr01	14034816	14046128	1.10382	-0.472708	2.87637	0.112325	0.285915	-0.170314	0.357404	0.559637	0.860998
MSTRG.644	HzChr01	14046407	14055829	7.3728	0.764751	2.20619	0.160175	0.357	-1.51344	8.34906	0.0121384	0.22291
MSTRG.645	HzChr01	14052005	14053059	2.8323	-0.930541	6.78574	0.0210572	0.0943682	-0.612067	2.92903	0.109518	0.457623
MSTRG.646	HzChr01	14056831	14067874	0.885987	0.315662	0.319321	0.581113	0.785215	0.129332	0.0481999	0.829449	0.971876
STRG.565	HzChr01	14072228	14072799	-1.18315	-0.0453515	0.000320996	0.986164	1	0	0	1	1	XP_021187525.1	uncharacterized protein LOC110374227 [Helicoverpa armigera]
MSTRG.647	HzChr01	14083351	14137791	3.36709	1.21279	37.6726	2.74176e-05	0.00112135	0.044532	0.0526713	0.821846	0.969451	XP_021183358.1	zinc finger protein 780A-like [Helicoverpa armigera]
MSTRG.647	HzChr01	14083351	14137791	3.36709	1.21279	37.6726	2.74176e-05	0.00112135	0.044532	0.0526713	0.821846	0.969451	XP_021187527.1	ras-GEF domain-containing family member 1B-like [Helicoverpa armigera]
MSTRG.647	HzChr01	14083351	14137791	3.36709	1.21279	37.6726	2.74176e-05	0.00112135	0.044532	0.0526713	0.821846	0.969451	XP_021187535.1	uncharacterized protein LOC110374233 [Helicoverpa armigera]
MSTRG.647	HzChr01	14083351	14137791	3.36709	1.21279	37.6726	2.74176e-05	0.00112135	0.044532	0.0526713	0.821846	0.969451	XP_021199700.1	uncharacterized protein LOC110383258 [Helicoverpa armigera]
MSTRG.651	HzChr01	14148944	14165517	2.83411	0.0864759	0.172587	0.684212	0.851582	0.191205	0.8423	0.374505	0.743904	XP_021187556.1	WW domain-containing adapter protein with coiled-coil homolog [Helicoverpa armigera]
MSTRG.652	HzChr01	14166300	14182081	4.02974	-0.0464062	0.0605772	0.80921	0.923421	-0.142398	0.574944	0.461058	0.805934	XP_021187506.1	uncharacterized protein LOC110374219 isoform X2 [Helicoverpa armigera]
MSTRG.652	HzChr01	14166300	14182081	4.02974	-0.0464062	0.0605772	0.80921	0.923421	-0.142398	0.574944	0.461058	0.805934	XP_021187507.1	uncharacterized protein LOC110374219 isoform X3 [Helicoverpa armigera]
MSTRG.653	HzChr01	14183225	14184159	6.62644	0.143785	1.65057	0.220033	0.440941	-0.161493	2.08173	0.171389	0.53872
MSTRG.655	HzChr01	14203633	14214064	0.850623	0.371587	1.81086	0.200103	0.414299	0.323615	1.37786	0.26033	0.639285	XP_021187542.1	ras-specific guanine nucleotide-releasing factor RalGPS2 [Helicoverpa armigera]
MSTRG.656	HzChr01	14252142	14254990	0.0943102	-0.327081	0.850661	0.372213	0.60839	-1.12549	9.35879	0.00861458	0.197678
MSTRG.657	HzChr01	14254991	14255992	-0.924921	6.84333	4.8929	0.0523096	0.175018	-5.41704	3.2641	0.102018	0.449339
MSTRG.658	HzChr01	14266151	14266370	3.98905	-2.04647	9.64702	0.00793785	0.0483392	0.926026	2.06558	0.173175	0.539669
MSTRG.659	HzChr01	14281300	14281836	3.10197	0.609807	0.802294	0.385926	0.62171	0.313949	0.183682	0.674911	0.914737
MSTRG.660	HzChr01	14282230	14282580	3.22496	-0.115002	0.00313143	0.956515	0.99278	8.68248	4.61169	0.0582605	0.37919
MSTRG.661	HzChr01	14286688	14287819	6.09436	11.3569	11.8544	0.00506707	0.0354531	0.856278	0.273983	0.61048	0.884541
MSTRG.663	HzChr01	14299596	14314963	-0.813266	-0.391876	0.501179	0.49077	0.71412	0.935738	2.78883	0.117444	0.468224
MSTRG.664	HzChr01	14299930	14302253	-1.44419	-7.53832	23.0355	0.0014575	0.0152391	5.35016	12.4362	0.00809885	0.193428
MSTRG.665	HzChr01	14318001	14321774	0.0588054	0.667579	1.2845	0.276375	0.50992	0.272679	0.225305	0.642453	0.898203
MSTRG.666	HzChr01	14321883	14365687	2.23883	-0.891014	11.15	0.0049547	0.0349307	0.55655	4.44402	0.0538076	0.370088	XP_021187572.1	neuralized-like protein 4 isoform X2 [Helicoverpa armigera]
MSTRG.666	HzChr01	14321883	14365687	2.23883	-0.891014	11.15	0.0049547	0.0349307	0.55655	4.44402	0.0538076	0.370088	XP_021199901.1	uncharacterized protein LOC110383436 [Helicoverpa armigera]
MSTRG.667	HzChr01	14327218	14368847	2.93797	1.45526	2.05181	0.174518	0.377167	2.94279	8.17409	0.0128828	0.226564	XP_021187551.1	neprilysin-11 isoform X1 [Helicoverpa armigera]
MSTRG.667	HzChr01	14327218	14368847	2.93797	1.45526	2.05181	0.174518	0.377167	2.94279	8.17409	0.0128828	0.226564	XP_021187553.1	neprilysin-11 isoform X3 [Helicoverpa armigera]
MSTRG.668	HzChr01	14389698	14456632	1.86855	0.276673	1.36998	0.261636	0.493537	0.300223	1.63303	0.222367	0.597633	XP_021187516.1	amyloid beta A4 precursor protein-binding family B member 1-interacting protein isoform X1 [Helicoverpa armigera]
MSTRG.668	HzChr01	14389698	14456632	1.86855	0.276673	1.36998	0.261636	0.493537	0.300223	1.63303	0.222367	0.597633	XP_021187518.1	amyloid beta A4 precursor protein-binding family B member 1-interacting protein isoform X2 [Helicoverpa armigera]
MSTRG.669	HzChr01	14429325	14429900	1.17303	3.20527	9.90065	0.00732929	0.0456544	-0.297762	0.129691	0.724261	0.933231
MSTRG.670	HzChr01	14462817	14465182	-0.258457	4.48661	23.2299	0.000283568	0.00509205	0.715907	0.978337	0.33964	0.717195	XP_021187575.1	uncharacterized protein LOC110374256 [Helicoverpa armigera]
MSTRG.671	HzChr01	14470256	14498264	3.82765	-0.272392	4.00671	0.0653852	0.202707	0.293978	4.66057	0.0489818	0.358081	XP_021187533.1	eukaryotic translation initiation factor 4 gamma 3-like isoform X3 [Helicoverpa armigera]
MSTRG.672	HzChr01	14499195	14500390	2.23339	-0.067237	0.0601146	0.809924	0.923623	-0.281694	1.04595	0.32404	0.705721
MSTRG.673	HzChr01	14501343	14502051	-0.657639	-2.31219	1.91984	0.191815	0.401888	-0.438878	0.0833173	0.77792	0.954111	XP_021187531.1	eukaryotic translation initiation factor 4 gamma 3-like isoform X1 [Helicoverpa armigera]
MSTRG.674	HzChr01	14503920	14525237	0.43646	-0.968398	2.20959	0.159682	0.356329	-0.230278	0.127411	0.726541	0.934206	XP_021187603.1	LOW QUALITY PROTEIN: sugar transporter ERD6-like 4 [Helicoverpa armigera]
MSTRG.675	HzChr01	14535097	14538428	9.70141	-0.255974	5.01885	0.0420729	0.151519	0.0652559	0.326571	0.576877	0.870972
MSTRG.676	HzChr01	14572118	14581023	6.66357	-0.596077	4.52384	0.0521649	0.174669	-0.631136	5.04993	0.0417144	0.338228	XP_021187541.1	catalase [Helicoverpa armigera]
MSTRG.677	HzChr01	14592811	14598740	2.67809	0.163323	0.379674	0.54781	0.761402	0.0733859	0.0771104	0.78537	0.957272
MSTRG.678	HzChr01	14613595	14613853	2.14718	-1.18447	0.880569	0.364348	0.600211	2.19537	2.88783	0.111905	0.459713
MSTRG.679	HzChr01	14616425	14627026	2.94358	-0.378804	4.53495	0.0517158	0.173613	0.213021	1.44452	0.249634	0.628151	XP_021187544.1	procollagen-lysine,2-oxoglutarate 5-dioxygenase 3 isoform X2 [Helicoverpa armigera]
MSTRG.680	HzChr01	14635875	14636216	5.74683	-2.31385	103.093	9.12445e-08	2.88533e-05	-2.53299	121.783	3.26465e-08	0.000423262
MSTRG.682	HzChr01	14745794	14746059	5.68056	1.71931	5.88916	0.029714	0.120282	-0.461889	0.445629	0.515542	0.839314
MSTRG.683	HzChr01	14748027	14753993	1.94025	-8.44365	18.8906	0.000709174	0.00913052	6.387	11.5717	0.00443639	0.159772	XP_021181694.1	protein TAPT1 homolog [Helicoverpa armigera]
MSTRG.684	HzChr01	14762332	14768783	2.55892	-3.53717	19.5882	0.00060981	0.00833107	1.58749	4.55141	0.0515456	0.363644	XP_021182637.1	THAP domain-containing protein 1-like isoform X1 [Helicoverpa armigera]
MSTRG.685	HzChr01	14807420	14807655	2.85457	-3.56184	4.88621	0.0446769	0.157216	0.40082	0.0747495	0.788635	0.957908
MSTRG.686	HzChr01	14815232	14815701	1.11036	-0.991418	3.34449	0.0892177	0.247318	0.6311	1.37576	0.260761	0.639606
MSTRG.687	HzChr01	14816549	14868661	1.67322	0.440047	0.863442	0.368833	0.605153	-0.241665	0.268767	0.612417	0.885748
MSTRG.688	HzChr01	14819709	14820109	4.79993	-14.2605	174.567	1.68136e-07	4.63805e-05	0.00758623	0.00020138	0.988967	1
MSTRG.689	HzChr01	14839086	14846163	3.84756	1.02568	0.559193	0.467269	0.69552	-0.0440364	0.00103371	0.974817	1	XP_021186627.1	uncharacterized protein LOC110373630 [Helicoverpa armigera]
MSTRG.690	HzChr01	14868307	14868661	1.47359	-0.841911	0.922233	0.353586	0.59062	0.615812	0.510432	0.486986	0.822263
MSTRG.691	HzChr01	14883570	14952703	1.53201	-1.18477	22.5184	0.000325749	0.00545651	0.126497	0.259996	0.618182	0.888452	XP_021194732.1	zinc finger protein 568-like [Helicoverpa armigera]
STRG.610	HzChr01	14959509	14966529	-1.22727	-1.07371	1.21058	0.290045	0.523884	-0.0740434	0.00657756	0.936525	1	XP_021194713.1	tetratricopeptide repeat protein 39B-like [Helicoverpa armigera]
MSTRG.693	HzChr01	14975457	14977829	0.823064	-3.23722	6.87871	0.0203975	0.0925308	0.783328	0.475586	0.50198	0.830668
MSTRG.694	HzChr01	15002759	15045982	6.22788	-0.372688	10.1022	0.00680815	0.0433215	0.138272	1.39329	0.257801	0.636404	XP_021194715.1	insulin-like growth factor 2 mRNA-binding protein 1 isoform X2 [Helicoverpa armigera]
MSTRG.694	HzChr01	15002759	15045982	6.22788	-0.372688	10.1022	0.00680815	0.0433215	0.138272	1.39329	0.257801	0.636404	XP_021194717.1	insulin-like growth factor 2 mRNA-binding protein 1 isoform X4 [Helicoverpa armigera]
MSTRG.694	HzChr01	15002759	15045982	6.22788	-0.372688	10.1022	0.00680815	0.0433215	0.138272	1.39329	0.257801	0.636404	XP_021194718.1	insulin-like growth factor 2 mRNA-binding protein 1 isoform X5 [Helicoverpa armigera]
MSTRG.694	HzChr01	15002759	15045982	6.22788	-0.372688	10.1022	0.00680815	0.0433215	0.138272	1.39329	0.257801	0.636404	XP_021194719.1	insulin-like growth factor 2 mRNA-binding protein 1 isoform X6 [Helicoverpa armigera]
MSTRG.696	HzChr01	15049482	15091754	3.04608	0.0713152	0.00594245	0.939672	0.986945	0.169514	0.0346922	0.854981	0.979571	XP_021198662.1	uncharacterized protein LOC110382384 [Helicoverpa armigera]
MSTRG.697	HzChr01	15063032	15064832	-0.694159	1.31247	2.88474	0.11185	0.285179	-0.764666	1.04367	0.32455	0.706189
MSTRG.698	HzChr01	15064090	15066357	-0.425432	-2.45966	3.9688	0.0666813	0.205471	-0.90982	0.647668	0.434701	0.788459	XP_021190256.1	uncharacterized protein LOC110376187 [Helicoverpa armigera]
MSTRG.699	HzChr01	15086057	15086963	0.16893	0.294565	0.0137688	0.908995	0.973684	8.52788	4.49775	0.0609093	0.385495
MSTRG.700	HzChr01	15086678	15091126	-1.56041	-3.09782	2.84975	0.113887	0.288218	0.9724	0.344383	0.566804	0.864657	XP_021198662.1	uncharacterized protein LOC110382384 [Helicoverpa armigera]
MSTRG.701	HzChr01	15117549	15129830	1.72116	-0.104804	0.224566	0.642994	0.824774	0.426222	3.69163	0.0755895	0.409052	XP_021194723.1	uncharacterized protein LOC110379386 isoform X1 [Helicoverpa armigera]
MSTRG.702	HzChr01	15132275	15146073	3.86972	-0.336937	5.14602	0.0399014	0.146559	0.358173	5.8148	0.0304322	0.302019	XP_021194735.1	vesicle-associated membrane protein-associated protein B isoform X2 [Helicoverpa armigera]
MSTRG.703	HzChr01	15147366	15154995	2.4408	-0.280443	2.69429	0.123297	0.302756	-0.28717	2.78571	0.117632	0.468743	XP_021194731.1	pyruvate dehydrogenase [acetyl-transferring]-phosphatase 1, mitochondrial [Helicoverpa armigera]
MSTRG.704	HzChr01	15307575	15310355	3.38514	1.66533	1.05776	0.3216	0.558308	0.527378	0.12435	0.729747	0.935083	XP_021195248.1	uncharacterized protein LOC110379772 [Helicoverpa armigera]
MSTRG.705	HzChr01	15341376	15342193	2.74944	0.467194	0.0450481	0.835051	0.938006	-3.80595	2.29391	0.152682	0.514901
STRG.625	HzChr01	15355509	15356545	-1.09151	0.542694	0.18057	0.677437	0.848514	0.236571	0.0350239	0.85427	0.979494
MSTRG.706	HzChr01	15367107	15409558	0.944071	-4.50503	4.17883	0.0607137	0.193014	0.528571	0.066759	0.799969	0.962611
MSTRG.707	HzChr01	15396633	15396966	0.547743	-3.26563	7.69863	0.0172224	0.0827456	-0.0444272	0.0017833	0.967031	1
MSTRG.709	HzChr01	15409630	15529472	0.924148	-0.119371	0.183054	0.675364	0.847306	0.55633	3.91561	0.068157	0.395841	XP_021186956.1	uncharacterized protein LOC110373862 isoform X2 [Helicoverpa armigera]
MSTRG.709	HzChr01	15409630	15529472	0.924148	-0.119371	0.183054	0.675364	0.847306	0.55633	3.91561	0.068157	0.395841	XP_021186961.1	uncharacterized protein LOC110373862 isoform X6 [Helicoverpa armigera]
MSTRG.710	HzChr01	15418764	15420548	0.193763	-0.144435	0.124543	0.729492	0.877597	0.361159	0.765155	0.396692	0.761491
MSTRG.711	HzChr01	15462205	15462625	0.923818	1.13546	0.467432	0.505607	0.726599	-1.35882	0.62167	0.4439	0.794524
MSTRG.713	HzChr01	15522792	15523697	1.02402	-6.13054	25.0872	0.000206273	0.00405816	-0.314031	0.120465	0.733822	0.936572
MSTRG.715	HzChr01	15550448	15616873	0.261951	-0.166875	0.304178	0.590096	0.791332	0.719833	5.68713	0.0320165	0.307933	XP_021186924.1	USP6 N-terminal-like protein isoform X1 [Helicoverpa armigera]
MSTRG.716	HzChr01	15565516	15568832	3.2455	0.60064	2.27694	0.154096	0.348133	-0.571758	2.0905	0.170777	0.538066
MSTRG.717	HzChr01	15566584	15601658	4.14325	-1.35893	45.2294	1.04519e-05	0.000604951	-0.242534	1.46997	0.245704	0.624085	XP_021186945.1	proton-coupled amino acid transporter-like protein pathetic [Helicoverpa armigera]
MSTRG.718	HzChr01	15576255	15576591	4.44448	9.38623	10.3178	0.00644196	0.0417392	-0.13421	0.00485512	0.945459	1
MSTRG.719	HzChr01	15611892	15615254	-0.00866203	0.211776	0.382772	0.546203	0.760391	-0.131244	0.146971	0.70729	0.925801
MSTRG.720	HzChr01	15621647	15627801	7.19529	-0.445142	2.42616	0.142192	0.331271	-0.621009	4.69292	0.0485002	0.357072
MSTRG.721	HzChr01	15626168	15626527	-0.923215	-4.72256	2.17978	0.179743	0.385062	-2.07667	0.694621	0.429831	0.785415
MSTRG.722	HzChr01	15629855	15643312	1.53723	-0.166146	0.33613	0.571418	0.778077	-0.285709	0.977943	0.339734	0.717197	XP_021187002.1	LOW QUALITY PROTEIN: nuclear hormone receptor FTZ-F1 [Helicoverpa armigera]
MSTRG.723	HzChr01	15650258	15651682	0.604475	1.41211	4.40222	0.0548854	0.180928	-0.348652	0.300772	0.592199	0.876932
MSTRG.724	HzChr01	15653153	15693979	-0.614799	-0.308019	0.149361	0.705042	0.864083	-0.0231066	0.00085034	0.977154	1
MSTRG.725	HzChr01	15660122	15661519	2.72444	-4.1843	9.53348	0.00822909	0.0494623	-3.84611	8.51141	0.011492	0.2208
MSTRG.726	HzChr01	15695200	15716780	7.59785	-1.29771	24.328	0.000236532	0.00449653	-0.546684	4.42654	0.0544038	0.372178	XP_021186947.1	probable medium-chain specific acyl-CoA dehydrogenase, mitochondrial isoform X2 [Helicoverpa armigera]
MSTRG.727	HzChr01	15733169	15749924	1.58472	-0.269318	0.339743	0.569418	0.776955	0.338191	0.538146	0.47553	0.816048	XP_021186932.1	polyhomeotic-proximal chromatin protein-like isoform X3 [Helicoverpa armigera]
MSTRG.728	HzChr01	15755553	15777091	1.8988	-0.735474	2.24984	0.156352	0.351319	-0.0584604	0.01503	0.904209	0.996999	XP_021186934.1	polyhomeotic-proximal chromatin protein-like isoform X5 [Helicoverpa armigera]
MSTRG.728	HzChr01	15755553	15777091	1.8988	-0.735474	2.24984	0.156352	0.351319	-0.0584604	0.01503	0.904209	0.996999	XP_021186935.1	polyhomeotic-proximal chromatin protein-like isoform X6 [Helicoverpa armigera]
MSTRG.729	HzChr01	15802119	15848158	4.09875	-0.125843	0.295591	0.595337	0.795234	-0.0905472	0.152268	0.702335	0.923995	XP_021186966.1	uncharacterized protein LOC110373866 [Helicoverpa armigera]
MSTRG.729	HzChr01	15802119	15848158	4.09875	-0.125843	0.295591	0.595337	0.795234	-0.0905472	0.152268	0.702335	0.923995	XP_021187003.1	lysophospholipase-like protein 1 [Helicoverpa armigera]
MSTRG.730	HzChr01	15809456	15809971	1.20783	0.752862	1.57316	0.230765	0.454994	-0.459943	0.620647	0.444249	0.794727
MSTRG.731	HzChr01	15812915	15813959	0.647366	-9.07822	3.86321	0.0787503	0.228054	0.846076	0.0914734	0.768727	0.949177
MSTRG.732	HzChr01	15838071	15838901	0.0549427	0.136123	0.0154856	0.902779	0.971169	0.878109	0.610615	0.447893	0.798181
MSTRG.734	HzChr01	15855902	15856705	-0.878625	6.3651	10.2724	0.00780176	0.0477347	-0.0414417	0.000836827	0.97741	1
MSTRG.735	HzChr01	15859430	15861432	2.5229	0.385715	1.30896	0.272054	0.504417	0.616586	3.27142	0.0923458	0.435533
MSTRG.737	HzChr01	15872837	15937396	7.22712	-0.688226	4.9289	0.0438812	0.155528	-1.03003	10.8676	0.00545542	0.169775	XP_021186967.1	uncharacterized protein LOC110373867 [Helicoverpa armigera]
MSTRG.739	HzChr01	15880760	15886840	3.00539	-0.591188	8.51152	0.0113896	0.0622277	-0.68254	11.2009	0.00488074	0.165651	XP_021192612.1	LOW QUALITY PROTEIN: uncharacterized protein LOC110377889, partial [Helicoverpa armigera]
MSTRG.740	HzChr01	15889179	15905741	2.64221	-0.692706	11.4231	0.00457232	0.0330235	-0.392502	3.65477	0.0769036	0.410831	XP_021186952.1	acetyl-coenzyme A synthetase [Helicoverpa armigera]
MSTRG.741	HzChr01	15915936	15921872	2.88981	0.867548	18.8471	0.000699667	0.00905308	0.459375	5.39095	0.036079	0.321551
MSTRG.742	HzChr01	15924984	15925962	-0.634532	3.21187	10.1704	0.00666557	0.0428454	0.662887	0.519148	0.483235	0.81972
MSTRG.743	HzChr01	15938830	15941980	4.0916	-0.240648	1.98052	0.181464	0.387081	0.046625	0.0736623	0.790096	0.957908
MSTRG.744	HzChr01	15943802	15985042	4.42792	-0.379341	1.20952	0.290438	0.5243	0.460868	1.80122	0.201454	0.572274	XP_021186943.1	failed axon connections [Helicoverpa armigera]
MSTRG.745	HzChr01	15964104	15990578	6.07191	1.06216	6.04168	0.0279956	0.11541	0.454099	1.13251	0.305696	0.688082
MSTRG.746	HzChr01	15991192	15994337	2.64097	4.46239	40.0977	2.07854e-05	0.000916606	1.06723	3.36359	0.0885325	0.43038	XP_021183358.1	zinc finger protein 780A-like [Helicoverpa armigera]
MSTRG.747	HzChr01	16005988	16006469	1.17006	-0.293656	0.0295954	0.866362	0.951978	8.44921	7.8304	0.0164923	0.243321
MSTRG.748	HzChr01	16024068	16024328	4.07774	-1.61084	10.4777	0.00613509	0.0402334	-0.187929	0.15018	0.704336	0.924824
MSTRG.749	HzChr01	16026142	16026414	4.5532	0.128463	0.108887	0.746422	0.887088	-0.0131285	0.00114964	0.973442	1
MSTRG.750	HzChr01	16030077	16053117	3.78502	-0.0380397	0.00503436	0.944464	0.988135	0.29918	0.316892	0.582606	0.873439	XP_021186982.1	protein Teyrha-meyrha isoform X1 [Helicoverpa armigera]
MSTRG.750	HzChr01	16030077	16053117	3.78502	-0.0380397	0.00503436	0.944464	0.988135	0.29918	0.316892	0.582606	0.873439	XP_021186984.1	uncharacterized protein LOC110373876 isoform X3 [Helicoverpa armigera]
MSTRG.751	HzChr01	16035910	16036689	-1.26077	-2.57204	1.60186	0.230316	0.454427	2.89808	2.42427	0.14615	0.507164
MSTRG.752	HzChr01	16066220	16075909	5.10656	-0.695389	29.968	8.62942e-05	0.00237197	0.167312	1.75046	0.207328	0.578814
MSTRG.753	HzChr01	16077451	16082218	5.36436	-0.14513	1.12718	0.30661	0.542616	0.0831556	0.368882	0.55348	0.85733
MSTRG.754	HzChr01	16160954	16173669	-0.675753	-0.989837	1.19999	0.292079	0.52572	1.4799	2.74415	0.120167	0.473748	XP_021186927.1	angiopoietin-related protein 2 isoform X1 [Helicoverpa armigera]
MSTRG.755	HzChr01	16174354	16179849	5.05003	-0.139502	0.7327	0.40663	0.640564	-0.147576	0.81805	0.381273	0.75038
MSTRG.756	HzChr01	16181580	16182468	3.91578	-0.99955	10.5589	0.00598349	0.0395594	0.775013	6.47608	0.0236984	0.278558
MSTRG.757	HzChr01	16183611	16195686	3.52112	-0.847221	22.8949	0.00030259	0.00523077	-0.375626	4.51415	0.0521857	0.365794
MSTRG.758	HzChr01	16199390	16221796	0.781736	-1.16745	7.11249	0.018594	0.0871867	0.178831	0.173271	0.683624	0.917942
MSTRG.760	HzChr01	16203214	16275248	1.29051	-0.320791	1.63009	0.222762	0.444873	0.341242	1.81322	0.199828	0.570865	XP_021189765.1	uncharacterized protein LOC110375827 isoform X1 [Helicoverpa armigera]
MSTRG.761	HzChr01	16221962	16227623	1.47443	0.0839115	0.175646	0.681594	0.850733	-0.148495	0.544129	0.473087	0.814903
MSTRG.763	HzChr01	16237946	16238422	6.10358	-11.4607	90.935	2.06832e-07	5.20916e-05	-2.36283	10.0108	0.007082	0.185142
MSTRG.765	HzChr01	16256477	16258546	1.4563	-1.98845	31.7706	6.48309e-05	0.00194181	0.0551572	0.026405	0.873271	0.987483
MSTRG.766	HzChr01	16281756	16312010	1.75296	-0.267899	0.539341	0.475003	0.701574	0.805212	5.09953	0.0406797	0.334865	XP_021186953.1	mucin-5AC-like isoform X1 [Helicoverpa armigera]
MSTRG.767	HzChr01	16314564	16322448	4.947	-2.06164	36.64	3.30555e-05	0.00126447	0.163109	0.245958	0.627822	0.892806	XP_021184860.1	D-3-phosphoglycerate dehydrogenase [Helicoverpa armigera]
MSTRG.768	HzChr01	16322435	16335504	2.93803	0.0339231	0.00956223	0.923517	0.980301	0.469993	1.86777	0.193726	0.564865	XP_021186986.1	uncharacterized protein LOC110373878 isoform X2 [Helicoverpa armigera]
MSTRG.769	HzChr01	16338157	16345853	2.80364	-0.0234281	0.0119109	0.914665	0.976419	-0.0725244	0.113326	0.741455	0.940252	XP_021186969.1	prostatic acid phosphatase [Helicoverpa armigera]
MSTRG.770	HzChr01	16346687	16471251	4.11704	-0.205797	1.1632	0.299298	0.533902	0.508076	7.09568	0.0187084	0.254792	XP_021187001.1	uncharacterized protein LOC110373889 [Helicoverpa armigera]
MSTRG.772	HzChr01	16414085	16419263	1.29009	0.763955	4.05954	0.0638394	0.199826	-1.35235	12.3424	0.00351354	0.146003
MSTRG.773	HzChr01	16421039	16421442	-1.2872	-0.363784	0.017179	0.898411	0.969205	5.20424	1.94746	0.194121	0.564865
MSTRG.775	HzChr01	16576780	16619720	2.26527	-2.14809	11.53	0.00449022	0.0325956	0.0163369	0.000714594	0.97906	1
MSTRG.776	HzChr01	16626526	16626730	3.6791	-0.152401	0.0248379	0.877078	0.957677	0.742269	0.594608	0.453779	0.801956
STRG.685	HzChr01	16792993	16793369	0.954615	8.93205	135.999	3.04797e-05	0.00120112	0	0	1	1
MSTRG.777	HzChr01	16794467	16794871	-0.302391	-8.80098	6.02313	0.0409762	0.149011	6.47353	3.34301	0.10657	0.453902
MSTRG.778	HzChr01	16796911	16918521	3.0323	-0.136115	0.449073	0.513836	0.732881	0.397176	3.84744	0.0703228	0.399873	XP_021184840.1	neurocalcin homolog [Helicoverpa armigera]
MSTRG.778	HzChr01	16796911	16918521	3.0323	-0.136115	0.449073	0.513836	0.732881	0.397176	3.84744	0.0703228	0.399873	XP_021184843.1	neuronal calcium sensor 2 [Helicoverpa armigera]
MSTRG.779	HzChr01	16850761	16886029	3.72997	-1.62575	22.3583	0.000345593	0.00570779	0.382571	1.28504	0.276474	0.656073
MSTRG.780	HzChr01	16897174	16897693	2.20463	1.19137	3.71564	0.0749659	0.221498	-0.0509209	0.00783203	0.930765	1
MSTRG.782	HzChr01	16920064	16972579	1.71899	-0.175135	0.557656	0.467742	0.695933	-0.138744	0.353399	0.561818	0.861825	XP_021184881.1	tyrosine-protein kinase PR2 isoform X3 [Helicoverpa armigera]
MSTRG.783	HzChr01	16956613	16986109	0.390657	-0.0784294	0.0655031	0.801777	0.919783	0.0387999	0.0156153	0.902357	0.996573
MSTRG.784	HzChr01	16987156	16987369	2.23559	0.41013	0.112419	0.742502	0.885252	-1.16739	0.89077	0.361669	0.733808
MSTRG.785	HzChr01	16992396	16992785	-0.14285	0.288825	0.045854	0.834142	0.937669	0.886118	0.443364	0.518464	0.84054
MSTRG.786	HzChr01	16994626	16996060	0.425267	-6.17155	5.31295	0.0404289	0.147739	0.98441	0.349663	0.565596	0.863783
MSTRG.787	HzChr01	17002181	17013388	0.881169	-0.551871	0.232811	0.63709	0.821715	0.0100821	7.83159e-05	0.993067	1	XP_021184869.1	uncharacterized protein LOC110372456 isoform X1 [Helicoverpa armigera]
MSTRG.788	HzChr01	17016611	17018711	0.81911	-1.48368	4.03517	0.0647582	0.201679	0.0418923	0.00330718	0.954974	1
MSTRG.789	HzChr01	17019198	17022415	0.40613	0.552636	2.22058	0.158685	0.354717	-0.154917	0.176166	0.681152	0.916752
MSTRG.790	HzChr01	17032773	17033801	0.209597	2.66332	14.6961	0.00187138	0.0179916	0.00364669	3.03187e-05	0.995685	1
MSTRG.791	HzChr01	17060287	17060501	0.692934	-9.3731	15.6355	0.00290363	0.0244563	7.58574	9.91219	0.0108049	0.216516
MSTRG.792	HzChr01	17112308	17209075	4.60519	-3.66517	153.168	8.15528e-09	5.91717e-06	0.494916	3.38372	0.0876387	0.428606	XP_021184860.1	D-3-phosphoglycerate dehydrogenase [Helicoverpa armigera]
MSTRG.792	HzChr01	17112308	17209075	4.60519	-3.66517	153.168	8.15528e-09	5.91717e-06	0.494916	3.38372	0.0876387	0.428606	XP_021184861.1	protein SERAC1-like [Helicoverpa armigera]
MSTRG.792	HzChr01	17112308	17209075	4.60519	-3.66517	153.168	8.15528e-09	5.91717e-06	0.494916	3.38372	0.0876387	0.428606	XP_021184910.1	forkhead box protein F2-like isoform X1 [Helicoverpa armigera]
MSTRG.792	HzChr01	17112308	17209075	4.60519	-3.66517	153.168	8.15528e-09	5.91717e-06	0.494916	3.38372	0.0876387	0.428606	XP_021184912.1	forkhead box protein F2-like isoform X2 [Helicoverpa armigera]
MSTRG.793	HzChr01	17126145	17132708	3.26181	-0.362778	7.75442	0.014778	0.0748594	-0.0110625	0.00723248	0.933448	1	XP_021184864.1	uncharacterized protein LOC110372454 [Helicoverpa armigera]
MSTRG.794	HzChr01	17135305	17136414	0.566305	-1.47516	16.0973	0.00132071	0.01421	0.0495116	0.0186287	0.893408	0.993937
MSTRG.795	HzChr01	17142559	17158614	1.7888	4.17386	39.895	2.13402e-05	0.000934715	0.423267	0.500528	0.491167	0.825529	XP_021184813.1	uncharacterized protein LOC110372436 [Helicoverpa armigera]
MSTRG.796	HzChr01	17155668	17155931	2.23303	1.80897	9.86798	0.00740457	0.0460212	0.00936368	0.000291883	0.986616	1
MSTRG.797	HzChr01	17158992	17160000	2.54074	-0.251098	1.21007	0.290141	0.52391	0.251873	1.21772	0.288684	0.670992	XP_021201306.1	uncharacterized protein LOC110384369 [Helicoverpa armigera]
MSTRG.798	HzChr01	17161405	17164392	0.39338	-0.147816	0.230925	0.638369	0.822482	0.423622	1.90825	0.18912	0.559039
MSTRG.799	HzChr01	17231793	17234141	3.7585	-1.38953	3.73967	0.0741345	0.21981	0.925345	1.68635	0.215585	0.589304
MSTRG.800	HzChr01	17236985	17241522	4.88743	-0.315355	3.55829	0.0804751	0.231382	0.105047	0.395049	0.539924	0.852058
MSTRG.801	HzChr01	17244249	17244466	3.95932	1.56518	1.28245	0.276937	0.509981	-1.16475	0.74301	0.403582	0.766278
MSTRG.803	HzChr01	17251302	17254913	-0.784476	0.496581	0.167852	0.688335	0.853914	2.0842	2.60875	0.128964	0.487423
MSTRG.804	HzChr01	17255126	17273720	3.20005	-0.0111607	0.000928523	0.976132	0.997922	-0.722969	3.86937	0.0698321	0.399513	XP_021184904.1	autophagy-related protein 13 homolog [Helicoverpa armigera]
MSTRG.805	HzChr01	17265291	17266800	1.18314	-0.111755	0.0303796	0.864189	0.951156	0.128157	0.0410519	0.842425	0.975618
MSTRG.807	HzChr01	17298016	17378921	2.58105	-0.436082	2.0924	0.170368	0.371669	-0.313329	1.07275	0.318138	0.700995	XP_021184874.1	nostrin isoform X1 [Helicoverpa armigera]
MSTRG.808	HzChr01	17307902	17308269	1.31248	2.07541	5.18108	0.0395072	0.145308	-0.518242	0.360563	0.558029	0.859755
MSTRG.809	HzChr01	17350238	17352380	1.81424	-0.977919	1.47188	0.245618	0.474157	0.00653195	6.67342e-05	0.9936	1
MSTRG.810	HzChr01	17355210	17363582	1.91461	-0.540987	1.44628	0.249483	0.478908	-0.333388	0.546574	0.472189	0.81419
MSTRG.811	HzChr01	17382015	17414436	1.91154	-1.2343	23.5051	0.000268959	0.00487937	-0.209932	0.684301	0.422187	0.780054	XP_021184886.1	transmembrane protein 198 isoform X1 [Helicoverpa armigera]
MSTRG.812	HzChr01	17414758	17426901	4.11808	-0.468956	7.47563	0.0163111	0.0800129	0.0325743	0.0361455	0.851984	0.978777	XP_021184858.1	protein DDI1 homolog 2 isoform X2 [Helicoverpa armigera]
MSTRG.813	HzChr01	17441389	17441804	0.448291	0.0507283	0.0013212	0.97162	0.99597	6.07741	6.54231	0.0255943	0.285568
MSTRG.814	HzChr01	17441549	17456398	5.17346	-0.627875	18.4674	0.000761156	0.0096456	-0.404837	7.67215	0.0152123	0.240851
MSTRG.815	HzChr01	17456407	17534022	1.09039	-0.286324	0.433227	0.521242	0.738811	1.04602	5.93645	0.0290074	0.297232	XP_021184815.1	alpha-mannosidase 2 [Helicoverpa armigera]
MSTRG.816	HzChr01	17520037	17520365	1.85616	-11.2906	8.09796	0.0226197	0.0992895	7.52454	3.43989	0.102414	0.44968
MSTRG.817	HzChr01	17520486	17520771	3.26405	9.73686	5.25002	0.0414336	0.149718	-2.67432	1.25721	0.284749	0.666165
MSTRG.818	HzChr01	17535491	17567544	2.29329	-1.42362	10.3834	0.00629976	0.0410434	0.486649	1.24291	0.284111	0.66616	XP_021184892.1	L-galactose dehydrogenase-like [Helicoverpa armigera]
MSTRG.819	HzChr01	17567285	17573583	1.25798	0.115394	0.204452	0.658178	0.836924	0.223559	0.779432	0.392438	0.759167	XP_021191701.1	uncharacterized protein LOC110377230 [Helicoverpa armigera]
MSTRG.820	HzChr01	17573584	17574306	-1.29821	0.153757	0.0105771	0.919567	0.978421	1.48948	0.802314	0.385776	0.754274
MSTRG.822	HzChr01	17583252	17584028	3.42682	-3.84107	4.84259	0.0455076	0.158903	-0.602454	0.148791	0.705636	0.92517
MSTRG.823	HzChr01	17629326	17638664	1.76486	-0.117427	0.27646	0.607379	0.802064	0.314846	2.00191	0.179273	0.546631
MSTRG.824	HzChr01	17640729	17725856	6.51086	-0.605326	1.28637	0.276236	0.509881	-1.29947	5.76451	0.0312105	0.30545	XP_021184873.1	sensory neuron membrane protein 2 [Helicoverpa armigera]
MSTRG.825	HzChr01	17653178	17664400	2.80489	-0.200476	0.309894	0.586717	0.788922	0.875971	5.98626	0.0285433	0.295706	XP_021184872.1	mucin-2-like [Helicoverpa armigera]
MSTRG.826	HzChr01	17740620	17770740	0.365613	-0.30169	1.11304	0.309547	0.545761	0.395114	1.88985	0.191136	0.561969
MSTRG.827	HzChr01	17758985	17760141	-0.156342	0	0	1	1	-1.06291	0.287414	0.604012	0.880696
MSTRG.828	HzChr01	17776128	17780621	0.300229	-0.99304	2.46838	0.138802	0.326067	0.387215	0.375315	0.550086	0.855942	XP_021184831.1	protein AF-10-like isoform X11 [Helicoverpa armigera]
MSTRG.829	HzChr01	17798895	17850920	4.46307	1.18536	19.2397	0.000653341	0.00872355	0.638243	5.72379	0.0316756	0.307492	XP_021184907.1	proton-coupled amino acid transporter-like protein CG1139 isoform X1 [Helicoverpa armigera]
MSTRG.831	HzChr01	17859981	17860201	1.84072	-1.76464	0.939881	0.349167	0.585807	1.78666	0.941897	0.348668	0.722941
MSTRG.832	HzChr01	17870958	17904510	5.61173	-0.117205	0.163523	0.692196	0.85592	-0.237083	0.672719	0.426191	0.782215	XP_021184848.1	GRB10-interacting GYF protein 2 isoform X1 [Helicoverpa armigera]
MSTRG.832	HzChr01	17870958	17904510	5.61173	-0.117205	0.163523	0.692196	0.85592	-0.237083	0.672719	0.426191	0.782215	XP_021184849.1	GRB10-interacting GYF protein 2 isoform X2 [Helicoverpa armigera]
MSTRG.833	HzChr01	17957538	17958522	-0.551186	-7.38091	10.8538	0.00847208	0.0502933	-0.320415	0.0437902	0.838593	0.974051
MSTRG.834	HzChr01	17965311	17966048	1.90839	0.636566	1.31624	0.270972	0.503028	-0.733586	1.73515	0.209431	0.580724
MSTRG.836	HzChr01	18025929	18026334	1.66442	1.19731	1.62995	0.222994	0.445198	-0.547246	0.346905	0.565487	0.863783
MSTRG.837	HzChr01	18068475	18068930	2.09972	-0.971714	0.66372	0.429229	0.66218	-0.603281	0.264632	0.615179	0.887285
MSTRG.838	HzChr01	18071236	18107216	5.15258	-0.126592	0.40433	0.535268	0.75073	0.250901	1.59414	0.22766	0.605086	XP_021184878.1	phytanoyl-CoA dioxygenase domain-containing protein 1 homolog [Helicoverpa armigera]
MSTRG.839	HzChr01	18072058	18077767	0.47463	0.806649	5.08647	0.0409013	0.148873	0.0877204	0.0609097	0.808698	0.964916
MSTRG.840	HzChr01	18088107	18088947	-1.34464	-7.70146	5.25633	0.0643533	0.200852	0	0	1	1
MSTRG.841	HzChr01	18106780	18110736	-0.957892	0.841978	0.236359	0.634558	0.820519	0.168532	0.0100871	0.921459	1
MSTRG.842	HzChr01	18109246	18117053	1.98782	1.02045	7.53947	0.0159444	0.0788401	-0.743272	4.0504	0.0641037	0.391477
MSTRG.843	HzChr01	18121799	18151182	3.76085	0.745735	6.46599	0.0237498	0.102844	-0.142381	0.238957	0.632694	0.894277	XP_021184847.1	solute carrier family 35 member F6 [Helicoverpa armigera]
MSTRG.844	HzChr01	18130217	18354468	5.84115	-0.148196	0.553125	0.469521	0.697449	-0.678571	11.4472	0.00454022	0.161271	XP_021184816.1	kalirin [Helicoverpa armigera]
MSTRG.844	HzChr01	18130217	18354468	5.84115	-0.148196	0.553125	0.469521	0.697449	-0.678571	11.4472	0.00454022	0.161271	XP_021184856.1	uncharacterized protein LOC110372449 [Helicoverpa armigera]
MSTRG.845	HzChr01	18151433	18152987	-0.2538	-0.117727	0.0454717	0.834258	0.937669	1.75942	9.89212	0.00726996	0.186163
MSTRG.846	HzChr01	18166096	18239200	4.64682	-0.994828	10.1655	0.00675063	0.0431355	0.627472	4.10748	0.0626835	0.38829	XP_021184812.1	L-lactate dehydrogenase-like isoform X2 [Helicoverpa armigera]
MSTRG.847	HzChr01	18294999	18296090	-0.481649	0.500767	0.173062	0.68386	0.851582	0.756011	0.386676	0.544281	0.853587
MSTRG.852	HzChr01	18329009	18329287	-1.50991	0	0	1	1	6.07545	3.28082	0.123052	0.478098
MSTRG.854	HzChr01	18358145	18358831	1.98697	0.836693	3.3493	0.0890545	0.246972	0.12628	0.0822609	0.778545	0.954336
MSTRG.855	HzChr01	18359987	18391441	2.06976	-0.0144921	0.00387726	0.951243	0.991151	0.402287	3.01813	0.104598	0.452295	XP_021184851.1	uncharacterized protein LOC110372448 [Helicoverpa armigera]
MSTRG.856	HzChr01	18401799	18403128	-0.695522	-3.74037	6.41521	0.0242267	0.104179	-0.996551	0.428218	0.523712	0.842852
MSTRG.857	HzChr01	18417027	18421877	0.624843	-0.942858	0.745572	0.402793	0.637789	-0.667241	0.40874	0.533188	0.847909	XP_021197778.1	E3 ubiquitin-protein ligase highwire-like [Helicoverpa armigera]
MSTRG.860	HzChr01	18438775	18446601	0.507383	-2.44071	8.41487	0.0118714	0.0642675	0.878949	1.17407	0.297328	0.679456	XP_021197778.1	E3 ubiquitin-protein ligase highwire-like [Helicoverpa armigera]
MSTRG.861	HzChr01	18450008	18469695	2.40705	-0.104996	0.031866	0.860943	0.949484	-0.918932	2.34848	0.14824	0.509225	XP_021197777.1	sodium-dependent nutrient amino acid transporter 1-like [Helicoverpa armigera]
MSTRG.862	HzChr01	18454252	18465096	-1.12593	-2.75629	1.12058	0.315557	0.552219	-4.33398	1.90042	0.19913	0.570043
MSTRG.863	HzChr01	18476135	18476656	0.413597	0.132955	0.0164827	0.899716	0.969478	1.50932	1.81372	0.19999	0.570865
MSTRG.865	HzChr01	18486075	18536657	1.97051	-0.152529	0.253613	0.622487	0.811914	-0.163263	0.294042	0.596292	0.878679	XP_021197771.1	tyrosine-protein phosphatase corkscrew-like isoform X1 [Helicoverpa armigera]
MSTRG.866	HzChr01	18492770	18494951	0.336752	3.37451	10.5809	0.00594165	0.0393832	-0.282558	0.120142	0.73416	0.936572
MSTRG.867	HzChr01	18511395	18511740	3.5665	0.904078	0.947532	0.347277	0.583823	-0.719251	0.613767	0.446749	0.797527
MSTRG.869	HzChr01	18559460	18559716	0.555484	1.68834	2.14053	0.169891	0.371001	1.38959	1.66655	0.221739	0.597184
MSTRG.1261	HzChr02	46549	47972	0.605862	9.44586	79.1582	0.000148998	0.00327972	0	0	1	1
MSTRG.1260	HzChr02	57511	59990	-1.38805	2.37667	4.16143	0.0609791	0.193447	0.34964	0.0979638	0.758968	0.945375
MSTRG.1255	HzChr02	65381	70891	-1.21562	1.244	1.46227	0.246884	0.475468	-0.0773562	0.00530533	0.942981	1
MSTRG.1256	HzChr02	67705	69910	-0.280211	-0.223504	0.111496	0.743468	0.885618	-0.755115	1.1909	0.293839	0.676364
MSTRG.1253	HzChr02	70967	72327	-0.899137	2.25687	1.51925	0.238533	0.46554	-0.900755	0.232751	0.637133	0.895875
MSTRG.1252	HzChr02	72916	83028	1.40055	0.505171	1.47353	0.245161	0.473344	0.849881	4.0719	0.0634841	0.389895	XP_021190284.1	uncharacterized protein LOC110376206 [Helicoverpa armigera]
MSTRG.1250	HzChr02	102761	97600	2.13929	-0.458628	1.75976	0.206194	0.422256	-2.1383	34.482	4.30752e-05	0.0419771
MSTRG.1248	HzChr02	151829	156742	0.128427	8.11981	7.58772	0.0178669	0.0846965	0.750666	0.155317	0.70062	0.923212
MSTRG.1247	HzChr02	152371	157263	-0.927894	-0.345476	0.129852	0.724043	0.874449	1.24947	1.58747	0.228583	0.605802
MSTRG.1239	HzChr02	272741	356510	0.545294	0.0511202	0.00457156	0.947073	0.989109	-0.575291	0.559449	0.467161	0.810701	XP_021190240.1	DAZ-associated protein 2-like [Helicoverpa armigera]
MSTRG.1239	HzChr02	272741	356510	0.545294	0.0511202	0.00457156	0.947073	0.989109	-0.575291	0.559449	0.467161	0.810701	XP_021190278.1	LOW QUALITY PROTEIN: mediator of RNA polymerase II transcription subunit 16 [Helicoverpa armigera]
MSTRG.1238	HzChr02	360287	378245	3.0915	-0.260159	0.533812	0.477345	0.70365	-1.51606	16.372	0.00125819	0.110312	XP_021190255.1	uncharacterized protein LOC110376185 [Helicoverpa armigera]
MSTRG.1235	HzChr02	387258	414267	4.1548	-0.161725	0.820913	0.380464	0.615974	0.063384	0.12519	0.728821	0.935083	XP_021190248.1	gastrula zinc finger protein XlCGF26 1-like [Helicoverpa armigera]
MSTRG.1235	HzChr02	387258	414267	4.1548	-0.161725	0.820913	0.380464	0.615974	0.063384	0.12519	0.728821	0.935083	XP_021190249.1	gastrula zinc finger protein XlCGF57 1-like [Helicoverpa armigera]
MSTRG.1235	HzChr02	387258	414267	4.1548	-0.161725	0.820913	0.380464	0.615974	0.063384	0.12519	0.728821	0.935083	XP_021190277.1	uncharacterized zinc finger protein CG2678-like [Helicoverpa armigera]
MSTRG.1236	HzChr02	395274	397705	0.906423	0.101244	0.100296	0.756216	0.892683	1.12017	12.1827	0.0036753	0.148907
MSTRG.1234	HzChr02	414513	430673	5.69214	-0.0730105	0.219997	0.646368	0.827646	-0.095034	0.372055	0.551801	0.855958
MSTRG.1228	HzChr02	435833	562512	3.91292	-0.490179	6.61339	0.0223667	0.0985672	-0.133839	0.494804	0.493493	0.826702	XP_021190264.1	protein daughterless isoform X7 [Helicoverpa armigera]
MSTRG.1228	HzChr02	435833	562512	3.91292	-0.490179	6.61339	0.0223667	0.0985672	-0.133839	0.494804	0.493493	0.826702	XP_021190265.1	protein daughterless isoform X8 [Helicoverpa armigera]
MSTRG.1227	HzChr02	563180	584591	3.58453	-0.832502	24.6948	0.000214981	0.00418503	-0.0380363	0.0519607	0.82303	0.969787
MSTRG.1226	HzChr02	589628	597522	2.54731	0.91174	5.78885	0.0308302	0.123208	0.113286	0.0917593	0.766495	0.948635	XP_021190271.1	uncharacterized protein LOC110376195 [Helicoverpa armigera]
MSTRG.1225	HzChr02	602769	623399	0.592015	0.586839	0.613102	0.446976	0.679371	0.147643	0.0411352	0.842265	0.975618	XP_021190276.1	uncharacterized protein LOC110376198 [Helicoverpa armigera]
MSTRG.1224	HzChr02	623736	642974	0.198906	-0.081365	0.00687294	0.935335	0.985584	2.03596	3.72741	0.0782101	0.413776	XP_021190269.1	BTB/PO Zdomain-containing protein 10 [Helicoverpa armigera]
MSTRG.1222	HzChr02	679711	684222	4.27731	0.394122	0.461099	0.508457	0.728807	-0.444795	0.592999	0.454378	0.801956
MSTRG.1221	HzChr02	684842	688723	0.290295	-0.164259	0.196503	0.66443	0.840834	0.707321	3.55472	0.0806111	0.419273
MSTRG.1218	HzChr02	690347	750323	3.14371	1.48504	2.83984	0.114658	0.289492	-0.777466	0.749893	0.401469	0.76511	XP_021190239.1	protein FAM214A [Helicoverpa armigera]
MSTRG.1217	HzChr02	756758	757373	5.2023	2.61103	20.1305	0.000543558	0.00771911	-1.86756	10.884	0.00542874	0.169599
MSTRG.1214	HzChr02	818012	887179	1.67403	-0.423769	0.75024	0.401307	0.636294	0.652897	1.84552	0.196244	0.566956	XP_021190243.1	proteoglycan 4-like [Helicoverpa armigera]
MSTRG.1213	HzChr02	952521	958477	1.95965	-1.85451	16.0404	0.00135466	0.0144791	0.637314	2.06762	0.172886	0.539669
MSTRG.1209	HzChr02	1015722	1022980	-0.750043	-0.738357	1.98767	0.180728	0.386146	0.491468	0.897816	0.35967	0.731929
MSTRG.1208	HzChr02	1028301	1030961	-1.34693	-0.0661234	0.00103545	0.974795	0.997328	1.35082	0.37525	0.550222	0.855942
MSTRG.1206	HzChr02	1043791	1057077	2.39149	-0.270891	1.75805	0.206402	0.422482	0.195446	0.918788	0.35429	0.727145
MSTRG.1205	HzChr02	1062299	1062577	-0.964027	6.84	4.72653	0.0629332	0.197801	0	0	1	1
MSTRG.1204	HzChr02	1063475	1064170	0.971669	1.02358	2.89247	0.111524	0.284517	0.563264	0.970078	0.341702	0.71979
MSTRG.1203	HzChr02	1064842	1106941	5.3172	-0.0606474	0.135224	0.718655	0.871614	-0.340708	4.27412	0.057991	0.378673	XP_021198456.1	paired amphipathic helix protein Sin3b isoform X2 [Helicoverpa armigera]
MSTRG.1203	HzChr02	1064842	1106941	5.3172	-0.0606474	0.135224	0.718655	0.871614	-0.340708	4.27412	0.057991	0.378673	XP_021198460.1	paired amphipathic helix protein Sin3b isoform X5 [Helicoverpa armigera]
MSTRG.1203	HzChr02	1064842	1106941	5.3172	-0.0606474	0.135224	0.718655	0.871614	-0.340708	4.27412	0.057991	0.378673	XP_021198461.1	paired amphipathic helix protein Sin3b isoform X6 [Helicoverpa armigera]
MSTRG.1203	HzChr02	1064842	1106941	5.3172	-0.0606474	0.135224	0.718655	0.871614	-0.340708	4.27412	0.057991	0.378673	XP_021198462.1	paired amphipathic helix protein Sin3b isoform X7 [Helicoverpa armigera]
MSTRG.1203	HzChr02	1064842	1106941	5.3172	-0.0606474	0.135224	0.718655	0.871614	-0.340708	4.27412	0.057991	0.378673	XP_021198463.1	paired amphipathic helix protein Sin3b isoform X8 [Helicoverpa armigera]
MSTRG.1203	HzChr02	1064842	1106941	5.3172	-0.0606474	0.135224	0.718655	0.871614	-0.340708	4.27412	0.057991	0.378673	XP_021198464.1	paired amphipathic helix protein Sin3b isoform X9 [Helicoverpa armigera]
MSTRG.1199	HzChr02	1107443	1166545	0.626509	9.00452	4.84425	0.0532833	0.177269	-1.56332	0.383909	0.549859	0.855942	XP_021198452.1	protein seele [Helicoverpa armigera]
MSTRG.1202	HzChr02	1116405	1136319	3.19197	-0.438014	3.1981	0.0956967	0.25875	-0.321242	1.7232	0.210699	0.58209	XP_021198450.1	ras-related protein Rab-31 isoform X1 [Helicoverpa armigera]
MSTRG.1200	HzChr02	1142863	1143377	-0.952504	0.5954	0.117664	0.73769	0.882139	-1.66459	0.89312	0.363813	0.735082
MSTRG.1201	HzChr02	1142984	1143345	2.20194	-9.03552	16.8452	0.00375464	0.0290274	0.128226	0.0110101	0.919129	1
MSTRG.1198	HzChr02	1147488	1177535	1.3536	-0.39445	2.47473	0.138335	0.325218	-0.496865	3.84119	0.0705256	0.399873
MSTRG.1196	HzChr02	1198934	1302633	2.16675	-0.39056	0.834619	0.376726	0.612085	-0.186304	0.193954	0.666509	0.909802	XP_021197593.1	uncharacterized protein LOC110381580 [Helicoverpa armigera]
MSTRG.1193	HzChr02	1304584	1330053	3.12219	-0.327703	5.79651	0.0306534	0.122797	0.0775076	0.324148	0.578277	0.871584
MSTRG.1192	HzChr02	1339483	1347147	1.2258	1.88236	15.6615	0.00146907	0.015323	-0.403026	0.715204	0.412149	0.773781	XP_021190373.1	uncharacterized protein LOC110376280 [Helicoverpa armigera]
MSTRG.1190	HzChr02	1397155	1444398	3.26038	1.74702	12.9239	0.00303532	0.0252424	-0.964685	4.09559	0.063019	0.389438	XP_021199573.1	uncharacterized protein LOC110383154 [Helicoverpa armigera]
MSTRG.1143	HzChr02	1916458	2363976	3.74107	0.0522979	0.0704559	0.794599	0.916057	-0.258268	1.7176	0.211401	0.583118	XP_021181149.1	LOW QUALITY PROTEIN: periodic tryptophan protein 1 homolog [Helicoverpa armigera]
MSTRG.1143	HzChr02	1916458	2363976	3.74107	0.0522979	0.0704559	0.794599	0.916057	-0.258268	1.7176	0.211401	0.583118	XP_021183539.1	uncharacterized protein LOC110371544 [Helicoverpa armigera]
MSTRG.1143	HzChr02	1916458	2363976	3.74107	0.0522979	0.0704559	0.794599	0.916057	-0.258268	1.7176	0.211401	0.583118	XP_021186787.1	uncharacterized protein LOC110373766 [Helicoverpa armigera]
MSTRG.1143	HzChr02	1916458	2363976	3.74107	0.0522979	0.0704559	0.794599	0.916057	-0.258268	1.7176	0.211401	0.583118	XP_021197712.1	LOW QUALITY PROTEIN: ornithine decarboxylase antizyme 1 [Helicoverpa armigera]
MSTRG.1146	HzChr02	2341252	2349568	-0.17692	1.98321	3.08364	0.101475	0.26817	-0.15281	0.0198544	0.890002	0.993719	XP_021186779.1	uncharacterized protein LOC110373759 [Helicoverpa armigera]
MSTRG.1145	HzChr02	2352713	2355591	7.08199	-0.0912907	0.433231	0.52124	0.738811	-0.460204	10.9511	0.00525663	0.168126
MSTRG.1142	HzChr02	2358508	2368813	1.98106	-0.0743937	0.0936668	0.764136	0.897502	0.196457	0.651307	0.433339	0.787266
MSTRG.1141	HzChr02	2369486	2382572	1.05298	-0.160868	0.389387	0.542802	0.757202	-0.126774	0.242287	0.630299	0.894073	XP_021186769.1	uncharacterized protein LOC110373755 isoform X1 [Helicoverpa armigera]
MSTRG.1137	HzChr02	2395260	2490274	1.20047	1.37538	1.47509	0.24513	0.473344	1.89771	2.92201	0.109994	0.458071	XP_021186783.1	uncharacterized protein LOC110373762 [Helicoverpa armigera]
MSTRG.1136	HzChr02	2525281	2534532	-0.351776	-0.0942096	0.00331105	0.954947	0.992182	-1.8199	1.14584	0.302978	0.685534	XP_021186778.1	LOW QUALITY PROTEIN: 4-coumarate--CoA ligase 1-like [Helicoverpa armigera]
MSTRG.1135	HzChr02	2535578	2570340	4.75975	-0.245642	2.63724	0.127003	0.308004	0.00854149	0.00317928	0.955843	1	XP_021186811.1	cullin-1 [Helicoverpa armigera]
MSTRG.1126	HzChr02	2831911	2846067	4.06344	-1.63926	51.4981	5.14618e-06	0.000399522	-0.218135	0.945022	0.347725	0.722672	XP_021186803.1	isochorismatase domain-containing protein 1-like isoform X1 [Helicoverpa armigera]
MSTRG.1126	HzChr02	2831911	2846067	4.06344	-1.63926	51.4981	5.14618e-06	0.000399522	-0.218135	0.945022	0.347725	0.722672	XP_021186804.1	isochorismatase domain-containing protein 1-like isoform X2 [Helicoverpa armigera]
MSTRG.1125	HzChr02	2842377	2848279	7.04297	0.406918	3.8512	0.0702225	0.211975	-0.358435	2.98591	0.106319	0.453902
MSTRG.1124	HzChr02	2849307	2880221	1.60606	0.951098	9.2002	0.00906845	0.0529844	-0.17221	0.296707	0.59465	0.877954	XP_021186815.1	NAD kinase 2, mitochondrial [Helicoverpa armigera]
MSTRG.1122	HzChr02	2904245	2930856	6.40958	0.0844287	0.0567539	0.81524	0.926994	-1.39552	14.7746	0.00186677	0.124986	XP_021186841.1	uncharacterized protein LOC110373801 [Helicoverpa armigera]
MSTRG.1121	HzChr02	2923260	2930978	3.31955	-0.287758	0.659824	0.430556	0.663436	-0.730249	4.29185	0.0577417	0.378673
MSTRG.1119	HzChr02	2933691	2935717	1.37341	0.716115	3.46149	0.0842605	0.238489	-0.666349	3.0732	0.101772	0.448946
MSTRG.1116	HzChr02	2947886	2950598	-0.310959	4.27462	24.3063	0.000231109	0.00441286	-0.651334	0.748115	0.401863	0.765343
MSTRG.1113	HzChr02	2960739	2975405	3.1952	0.175681	1.45462	0.248064	0.477077	-0.156622	1.15087	0.301774	0.684545
MSTRG.1112	HzChr02	2976185	2979973	6.38897	0.0435366	0.174422	0.682638	0.851082	-0.00639936	0.00376333	0.951963	1	XP_021186840.1	RNA-binding protein 8A [Helicoverpa armigera]
MSTRG.1111	HzChr02	2980766	2983679	8.30252	0.161826	0.742539	0.403577	0.638501	-0.0712514	0.143975	0.710137	0.926427
MSTRG.1101	HzChr02	2984060	3284240	12.4745	0.0550886	0.0651921	0.802237	0.919783	-0.300017	1.93021	0.186751	0.556989	XP_021186830.1	60S ribosomal protein L23 [Helicoverpa armigera]
MSTRG.1110	HzChr02	2993560	2997738	6.21928	0.526531	4.35064	0.0562524	0.183567	-0.262499	1.0871	0.315211	0.698495
MSTRG.1109	HzChr02	3052315	3086369	2.86977	1.02772	5.26886	0.0381067	0.14201	0.607138	1.91384	0.188737	0.558289	XP_021186765.1	uncharacterized protein LOC110373752 [Helicoverpa armigera]
MSTRG.1107	HzChr02	3119429	3120180	-0.158828	-0.893701	0.341506	0.568491	0.776324	-0.199806	0.019724	0.890361	0.993847
MSTRG.1106	HzChr02	3164538	3165133	3.20558	7.10159	22.4107	0.000342055	0.00566379	-0.22238	0.0373097	0.849679	0.977951
MSTRG.1104	HzChr02	3173989	3182558	0.365051	1.01437	6.95443	0.0197024	0.0901982	0.112271	0.0826207	0.778049	0.954111
MSTRG.1103	HzChr02	3226087	3226322	0.394591	1.92746	2.84072	0.132089	0.317078	0	0	1	1
MSTRG.1102	HzChr02	3260797	3261136	1.77057	-2.63895	7.38289	0.0169868	0.0821768	-0.173419	0.0347146	0.854935	0.979571
MSTRG.1100	HzChr02	3278916	3309134	4.29214	1.87462	2.05308	0.174394	0.37708	2.28175	3.52701	0.0818972	0.421181	XP_021186798.1	probable nuclear hormone receptor HR3 isoform X5 [Helicoverpa armigera]
MSTRG.1099	HzChr02	3311654	3328089	3.13911	1.57869	13.2003	0.0028162	0.023958	-0.708784	2.64163	0.126944	0.484367	XP_021186802.1	androgen-dependent TFPI-regulating protein-like [Helicoverpa armigera]
MSTRG.1098	HzChr02	3344829	3350198	6.18874	1.07468	16.032	0.00136788	0.0145485	-0.631843	5.61308	0.0331491	0.310983	XP_021186809.1	uncharacterized protein LOC110373782 [Helicoverpa armigera]
MSTRG.1097	HzChr02	3352440	3357702	0.351052	-0.943281	2.80807	0.116295	0.292034	-1.83092	9.64589	0.00785809	0.19196
MSTRG.1093	HzChr02	3492193	3500874	5.95935	-0.0745281	0.143423	0.710666	0.866618	-0.407321	4.28111	0.0578116	0.378673
MSTRG.1091	HzChr02	3510734	3532542	2.06683	-5.35499e-05	4.64762e-09	0.999947	1	1.2505	2.23985	0.157246	0.522677	XP_021180780.1	probable chitinase 2 [Helicoverpa armigera]
MSTRG.1089	HzChr02	3541069	3557700	-0.0760358	0.485782	0.168408	0.687896	0.853833	-0.63039	0.259877	0.618344	0.888557	XP_021201757.1	angiotensin-converting enzyme-related protein-like [Helicoverpa armigera]
STRG.961	HzChr02	3559320	3560163	0.00365945	2.19626	0.797547	0.393541	0.629287	8.51466	5.15126	0.0474928	0.353876	XP_021201760.1	uncharacterized protein LOC110384676 isoform X2 [Helicoverpa armigera]
STRG.960	HzChr02	3560763	3593694	-0.479723	1.0647	1.09848	0.312629	0.548847	1.47565	2.12164	0.167629	0.535098	XP_021201760.1	uncharacterized protein LOC110384676 isoform X2 [Helicoverpa armigera]
MSTRG.1087	HzChr02	3606583	3651537	2.28661	1.00857	2.76598	0.119058	0.296574	0.2148	0.132477	0.721452	0.931547	XP_021180764.1	uncharacterized protein LOC110369598 [Helicoverpa armigera]
MSTRG.1088	HzChr02	3633247	3636267	4.14361	0.105434	0.547549	0.471725	0.699296	-0.0972182	0.46343	0.50729	0.834026
MSTRG.1086	HzChr02	3667174	3668136	-1.11282	-1.44375	0.97179	0.341263	0.577558	0.802502	0.302811	0.590953	0.876932
MSTRG.1083	HzChr02	3711249	3716548	9.68041	-0.0433423	0.11535	0.739248	0.883269	-0.12	0.883883	0.36331	0.73458
MSTRG.1082	HzChr02	3718282	3725225	7.40055	-0.222096	2.31198	0.150963	0.344276	-0.0820199	0.315457	0.58336	0.873962	XP_021201674.1	T-complex protein 1 subunit epsilon [Helicoverpa armigera]
MSTRG.1081	HzChr02	3728250	3733965	2.6521	0.181554	0.457991	0.509752	0.729846	-0.109892	0.168075	0.688123	0.919442
MSTRG.1080	HzChr02	3734460	3738901	10.9293	-0.158424	0.150585	0.703959	0.863892	-0.965546	5.49399	0.0347734	0.317264
MSTRG.1079	HzChr02	3740081	3746644	7.47051	-0.0136262	0.0141548	0.907011	0.973399	-0.113974	0.989841	0.336911	0.715722
MSTRG.1076	HzChr02	3790864	3792631	5.59445	0.825656	1.20196	0.291889	0.525529	-0.281879	0.139408	0.714603	0.929177
MSTRG.1071	HzChr02	3792937	3878277	7.98908	-0.743724	9.73084	0.00769132	0.0472418	-0.172691	0.529916	0.47888	0.81784	XP_021201699.1	histidine triad nucleotide-binding protein 1-like [Helicoverpa armigera]
MSTRG.1075	HzChr02	3794399	3797710	4.98538	-0.288526	1.49885	0.241439	0.468916	0.188195	0.635404	0.438947	0.791405
MSTRG.1074	HzChr02	3815329	3819679	-1.69874	-5.94256	6.72844	0.0238194	0.102995	-2.64408	1.90888	0.192777	0.563298
MSTRG.1073	HzChr02	3832827	3833262	2.97978	-4.14899	17.09	0.00106451	0.0122788	-0.808681	0.802922	0.385745	0.754274
MSTRG.1072	HzChr02	3838263	3839305	0.83538	3.16763	24.0154	0.000246913	0.00462605	-1.09627	3.34219	0.0893108	0.431649
MSTRG.1062	HzChr02	4012930	4214842	1.78257	0.554216	1.14724	0.30269	0.53766	-0.299322	0.33504	0.572129	0.867866	XP_021201667.1	cyclin-T-like isoform X1 [Helicoverpa armigera]
MSTRG.1062	HzChr02	4012930	4214842	1.78257	0.554216	1.14724	0.30269	0.53766	-0.299322	0.33504	0.572129	0.867866	XP_021201668.1	cyclin-T-like isoform X2 [Helicoverpa armigera]
MSTRG.1062	HzChr02	4012930	4214842	1.78257	0.554216	1.14724	0.30269	0.53766	-0.299322	0.33504	0.572129	0.867866	XP_021201669.1	cyclin-T-like isoform X3 [Helicoverpa armigera]
MSTRG.1063	HzChr02	4175735	4178491	3.93597	1.71708	3.87403	0.0696828	0.211095	-0.85233	0.995852	0.335672	0.715082
MSTRG.1061	HzChr02	4214467	4223971	0.727305	0.108719	0.0156705	0.902204	0.970792	-0.847426	0.920762	0.353958	0.72697	XP_021201670.1	KAT8 regulatory NSL complex subunit 2 isoform X1 [Helicoverpa armigera]
MSTRG.1060	HzChr02	4230795	4238876	7.50529	0.00926436	0.00135631	0.971154	0.99597	-1.25203	24.0234	0.000249847	0.0656917
MSTRG.1059	HzChr02	4246538	4246814	2.35327	0.721613	2.10749	0.169166	0.369853	0.875181	3.07947	0.101685	0.448826
MSTRG.1057	HzChr02	4247240	4337947	1.8392	0.125928	0.0213407	0.885989	0.962209	0.791162	0.889555	0.361986	0.733924	XP_021201663.1	PTB domain-containing adapter protein ced-6 isoform X1 [Helicoverpa armigera]
MSTRG.1058	HzChr02	4329648	4329958	3.4361	-1.12917	4.49291	0.0528704	0.176257	-0.541558	1.04772	0.323825	0.705721
MSTRG.1056	HzChr02	4352290	4358665	-0.751766	-0.96441	1.98528	0.180973	0.386355	-0.727869	1.07187	0.318329	0.701179
MSTRG.1055	HzChr02	4360904	4361519	1.01768	0.0501092	0.00270842	0.959248	0.993842	0.402756	0.166106	0.689913	0.920047
MSTRG.1053	HzChr02	4371481	4374189	0.83765	3.20441	19.7437	0.000586362	0.00810467	0.546668	0.715896	0.412039	0.773781
MSTRG.1051	HzChr02	4383511	4421199	-0.525549	-0.381702	0.0739383	0.789754	0.912907	-1.67927	1.35884	0.263696	0.642259	XP_021201637.1	phosphatidylinositol 4-phosphate 5-kinase type-1 gamma isoform X3 [Helicoverpa armigera]
MSTRG.1050	HzChr02	4409920	4442798	0.826861	0.0369441	0.00748483	0.9323	0.983941	0.665103	2.43294	0.141448	0.500512
MSTRG.1048	HzChr02	4443376	4470492	3.87857	-0.437634	1.2681	0.279525	0.512739	0.515583	1.76079	0.206287	0.577899	XP_021180770.1	hepatoma-derived growth factor-related protein 2 [Helicoverpa armigera]
MSTRG.1047	HzChr02	4473492	4480948	9.00537	-0.204085	4.24197	0.0588255	0.188903	-0.258478	6.80052	0.0208562	0.267195
MSTRG.1046	HzChr02	4481268	4484728	-0.893988	3.02628	2.73793	0.120784	0.299133	-0.587927	0.126788	0.727227	0.93446
MSTRG.1043	HzChr02	4489134	4624094	2.71241	-0.0049664	0.00056914	0.981309	1	-0.150561	0.519385	0.483137	0.819702	XP_021180771.1	uncharacterized protein LOC110369605 [Helicoverpa armigera]
MSTRG.1043	HzChr02	4489134	4624094	2.71241	-0.0049664	0.00056914	0.981309	1	-0.150561	0.519385	0.483137	0.819702	XP_021187399.1	uncharacterized protein K02A2 6-like [Helicoverpa armigera]
MSTRG.1043	HzChr02	4489134	4624094	2.71241	-0.0049664	0.00056914	0.981309	1	-0.150561	0.519385	0.483137	0.819702	XP_021201702.1	uncharacterized protein LOC110384636 [Helicoverpa armigera]
MSTRG.1045	HzChr02	4504657	4504965	0.615088	2.63558	4.04943	0.0643426	0.200852	-0.841635	0.471747	0.503682	0.831666
MSTRG.1040	HzChr02	4633637	4681563	1.67693	-0.340833	0.850778	0.372181	0.60839	1.37457	13.5987	0.00249167	0.128817	XP_021201697.1	uncharacterized protein LOC110384631 [Helicoverpa armigera]
MSTRG.1041	HzChr02	4674144	4674533	5.17058	-0.689287	1.93804	0.186139	0.393559	-0.581745	1.38601	0.259192	0.637792
MSTRG.1032	HzChr02	4696857	4768454	2.91882	1.68769	35.0217	3.98217e-05	0.00142228	-0.0921678	0.110299	0.744795	0.941087	XP_021201693.1	dymeclin [Helicoverpa armigera]
MSTRG.1031	HzChr02	4770085	4789946	1.74419	0.668853	4.14595	0.0614039	0.194454	0.540916	2.71617	0.121912	0.476655
MSTRG.1020	HzChr02	4796475	4939875	2.42095	-0.108585	0.0291052	0.867038	0.952479	0.214249	0.114184	0.740569	0.939988	XP_021180813.1	WD repeat-containing protein 7 [Helicoverpa armigera]
MSTRG.1027	HzChr02	4859375	4861604	1.10884	2.20252	31.6944	6.56036e-05	0.00195529	0.352117	0.945785	0.347537	0.722578
MSTRG.1025	HzChr02	4885449	4886568	-1.68712	7.17489	5.7823	0.0442038	0.156244	4.5669	2.56785	0.149418	0.510024
MSTRG.1023	HzChr02	4898251	4905686	1.93324	0.0687028	0.0167107	0.899029	0.969226	-1.75476	10.0231	0.00705484	0.185142
MSTRG.1019	HzChr02	4943405	4981993	3.49652	0.0972834	0.290475	0.598506	0.797168	-0.380275	4.40516	0.0547321	0.373475	XP_021201707.1	LIM and SH3 domain protein Lasp [Helicoverpa armigera]
MSTRG.1016	HzChr02	4984267	5053959	3.75706	0.0854584	0.0994531	0.757228	0.893353	0.146504	0.290608	0.598462	0.879114	XP_021201656.1	transcription factor CP2 isoform X3 [Helicoverpa armigera]
MSTRG.1016	HzChr02	4984267	5053959	3.75706	0.0854584	0.0994531	0.757228	0.893353	0.146504	0.290608	0.598462	0.879114	XP_021201658.1	transcription factor CP2 isoform X5 [Helicoverpa armigera]
MSTRG.1016	HzChr02	4984267	5053959	3.75706	0.0854584	0.0994531	0.757228	0.893353	0.146504	0.290608	0.598462	0.879114	XP_021201659.1	transcription factor CP2 isoform X6 [Helicoverpa armigera]
MSTRG.1018	HzChr02	4996945	5004423	0.79587	2.4493	10.3819	0.00631687	0.0410724	0.141141	0.0370781	0.85014	0.978186
MSTRG.1017	HzChr02	5018737	5019567	-1.6019	4.35902	5.52282	0.0370428	0.139035	0.489792	0.109272	0.746771	0.942106
MSTRG.1014	HzChr02	5059565	5068905	-1.21881	0.16079	0.00786406	0.930623	0.983657	-0.448826	0.0632492	0.805176	0.964206
MSTRG.1010	HzChr02	5076053	5136744	3.38752	-1.15219	5.63269	0.0328903	0.128286	0.181135	0.144524	0.709672	0.926213	XP_021180772.1	unconventional myosin-Va [Helicoverpa armigera]
MSTRG.1012	HzChr02	5099363	5104822	1.63699	3.61108	6.5397	0.0231416	0.100783	-1.12212	0.759052	0.398684	0.763279	XP_021197033.1	uncharacterized protein LOC110381145 [Helicoverpa armigera]
MSTRG.1011	HzChr02	5118147	5123337	3.35389	1.27133	0.721217	0.410387	0.644304	1.28955	0.751634	0.400937	0.764946	XP_021187399.1	uncharacterized protein K02A2 6-like [Helicoverpa armigera]
MSTRG.1009	HzChr02	5143153	5177921	6.51949	1.78974	13.6883	0.00247228	0.0217752	-0.257501	0.300735	0.592275	0.876932	XP_021180796.1	solute carrier family 28 member 3 isoform X2 [Helicoverpa armigera]
MSTRG.1009	HzChr02	5143153	5177921	6.51949	1.78974	13.6883	0.00247228	0.0217752	-0.257501	0.300735	0.592275	0.876932	XP_021193090.1	uncharacterized protein LOC110378233 [Helicoverpa armigera]
MSTRG.1006	HzChr02	5144935	5211454	4.28134	0.129684	0.531802	0.478048	0.704306	0.0407419	0.0524891	0.822149	0.969631	XP_021180773.1	mothers against decapentaplegic homolog 3 [Helicoverpa armigera]
MSTRG.1008	HzChr02	5202647	5203461	-1.27741	-1.83962	0.530341	0.48375	0.707991	-5.20014	2.61656	0.137912	0.496653
MSTRG.1007	HzChr02	5207886	5208564	-0.449341	1.17482	0.187742	0.672713	0.846393	6.96935	3.01665	0.108738	0.456485
MSTRG.1005	HzChr02	5220169	5220822	-0.286419	-6.79599	5.13946	0.0477004	0.163738	-1.14228	0.313458	0.588318	0.875715
MSTRG.1004	HzChr02	5227308	5228616	-1.57029	0	0	1	1	0.066369	0.000609964	0.980799	1
MSTRG.1002	HzChr02	5230471	5239631	2.64917	-0.0432923	0.0487789	0.828437	0.934785	0.0955049	0.2378	0.633457	0.894277	XP_021201776.1	actin-like protein 6B [Helicoverpa armigera]
MSTRG.1001	HzChr02	5241814	5242420	-1.3712	0	0	1	1	1.44475	0.427222	0.532491	0.847909
MSTRG.1000	HzChr02	5270489	5298511	3.28037	-0.497723	1.36578	0.262536	0.494089	-1.26041	8.38026	0.0120109	0.222004
MSTRG.995	HzChr02	5293916	5339616	3.62972	-0.269436	0.910221	0.356554	0.593341	0.257304	0.839279	0.375415	0.744894	XP_021194803.1	LOW QUALITY PROTEIN: uncharacterized protein LOC110379456 [Helicoverpa armigera]
MSTRG.999	HzChr02	5315559	5317091	-1.4522	4.85523	5.08248	0.0441263	0.156098	1.58507	0.844334	0.376671	0.745793
MSTRG.998	HzChr02	5317257	5318539	3.25088	-0.183327	0.559369	0.467072	0.695406	0.423763	3.00407	0.105335	0.452509
MSTRG.997	HzChr02	5320076	5321762	-0.524486	-2.02171	1.58281	0.229444	0.452846	0.289324	0.0367815	0.850733	0.978422
MSTRG.990	HzChr02	5323265	5446190	6.58316	-0.160857	0.147795	0.706572	0.86454	-0.946046	5.01585	0.0423115	0.339474	XP_021201676.1	steroidogenic acute regulatory protein-like isoform X2 [Helicoverpa armigera]
MSTRG.996	HzChr02	5337864	5339565	0.00758368	-8.66905	116.041	9.52452e-07	0.000131367	1.23945	5.66925	0.0390301	0.33052
MSTRG.994	HzChr02	5339891	5342683	2.60348	-1.97538	12.2011	0.00370773	0.0287848	-0.448946	0.656796	0.431591	0.786393	XP_021180819.1	carbonyl reductase [NADPH] 1-like [Helicoverpa armigera]
MSTRG.993	HzChr02	5344357	5351336	3.59262	0.109432	0.160064	0.695245	0.858217	-0.46039	2.77738	0.118216	0.469981	XP_021201706.1	guanine nucleotide-binding protein G(f) subunit alpha-like [Helicoverpa armigera]
MSTRG.992	HzChr02	5371126	5376762	0.206333	-0.20097	0.164798	0.691003	0.855306	-1.00238	3.85027	0.0702314	0.399873
MSTRG.991	HzChr02	5377768	5381769	-0.342705	0.807464	0.209929	0.65403	0.833529	3.1656	2.68918	0.123855	0.479506
MSTRG.989	HzChr02	5447252	5461360	1.35241	-0.0771693	0.0802657	0.781144	0.908544	0.00770577	0.000817928	0.977594	1	XP_021201779.1	polyhomeotic-like protein 3 isoform X2 [Helicoverpa armigera]
MSTRG.987	HzChr02	5465637	5551613	5.6055	0.159842	0.934581	0.350317	0.587097	-0.086864	0.275689	0.607876	0.883037	XP_021180776.1	aspartate--tRNA ligase, cytoplasmic [Helicoverpa armigera]
MSTRG.988	HzChr02	5490428	5543394	1.91223	-0.0917884	0.247819	0.626455	0.815004	0.287251	2.43897	0.140994	0.500102
MSTRG.986	HzChr02	5544776	5554719	4.4413	-0.322845	3.95046	0.0670803	0.206089	-0.311971	3.70994	0.0749467	0.408016
MSTRG.984	HzChr02	5682126	5702559	0.0444656	0.455428	0.251502	0.62398	0.8133	-0.620573	0.500924	0.490958	0.825529
MSTRG.983	HzChr02	5726753	5728214	-1.53914	4.17714	8.75972	0.0104816	0.058752	0.415813	0.116756	0.737728	0.938459
MSTRG.982	HzChr02	5738811	5752478	1.56003	-7.90909	9.3872	0.0124458	0.0666109	0.165306	0.0128196	0.912173	0.999408
MSTRG.981	HzChr02	5757184	5757520	3.73603	1.9059	12.0119	0.00391119	0.0297704	0.572647	1.16451	0.299224	0.681375	XP_021192612.1	LOW QUALITY PROTEIN: uncharacterized protein LOC110377889, partial [Helicoverpa armigera]
MSTRG.979	HzChr02	5762664	5777175	7.27829	3.31585	26.7929	0.000152265	0.00332342	-0.124052	0.0448947	0.835328	0.973426
MSTRG.976	HzChr02	5781973	5797852	2.46003	1.03499	4.71436	0.0480574	0.164403	-1.81888	14.1169	0.00220968	0.126348	XP_021180826.1	aldo-keto reductase AKR2E4-like [Helicoverpa armigera]
MSTRG.974	HzChr02	5782946	5812123	7.88851	-0.347406	0.84262	0.374577	0.610714	-1.29545	11.3561	0.00472294	0.163957	XP_021201782.1	uncharacterized protein LOC110384691 [Helicoverpa armigera]
MSTRG.978	HzChr02	5788038	5789529	-0.748546	1.53078	0.919469	0.354285	0.591236	-0.7301	0.208898	0.654819	0.904507
MSTRG.977	HzChr02	5794650	5794974	-0.230559	7.84122	4.70312	0.0634551	0.199213	7.00021	3.63525	0.0946605	0.439411
MSTRG.975	HzChr02	5806517	5809262	1.28383	-0.447624	4.22702	0.0592184	0.189759	0.312797	2.06027	0.173464	0.539669	XP_021201781.1	uncharacterized protein CG4449-like [Helicoverpa armigera]
MSTRG.973	HzChr02	5827548	5828090	-0.227685	2.86877	1.71624	0.215409	0.434471	-0.862728	0.323898	0.580076	0.871802
MSTRG.972	HzChr02	5843317	5843777	4.20032	-3.15881	22.131	0.000361442	0.00590828	0.0223075	0.00132622	0.971477	1
MSTRG.971	HzChr02	5866464	5866982	-1.12157	7.27029	12.6634	0.00406758	0.0306072	-0.231176	0.0244412	0.878425	0.990156
MSTRG.957	HzChr02	5871540	6097831	5.40751	-1.24036	26.8739	0.000148195	0.00326761	0.479684	4.12431	0.0621298	0.387266	XP_021201685.1	talin-2 isoform X2 [Helicoverpa armigera]
MSTRG.957	HzChr02	5871540	6097831	5.40751	-1.24036	26.8739	0.000148195	0.00326761	0.479684	4.12431	0.0621298	0.387266	XP_021201686.1	talin-2 isoform X3 [Helicoverpa armigera]
MSTRG.957	HzChr02	5871540	6097831	5.40751	-1.24036	26.8739	0.000148195	0.00326761	0.479684	4.12431	0.0621298	0.387266	XP_021201690.1	talin-2 isoform X7 [Helicoverpa armigera]
MSTRG.957	HzChr02	5871540	6097831	5.40751	-1.24036	26.8739	0.000148195	0.00326761	0.479684	4.12431	0.0621298	0.387266	XP_021201691.1	talin-1 isoform X8 [Helicoverpa armigera]
MSTRG.957	HzChr02	5871540	6097831	5.40751	-1.24036	26.8739	0.000148195	0.00326761	0.479684	4.12431	0.0621298	0.387266	XP_021201727.1	LYR motif-containing protein 4B [Helicoverpa armigera]
MSTRG.970	HzChr02	5879874	5880148	1.13897	8.84312	17.2045	0.00143649	0.0150802	0.290825	0.0547461	0.819061	0.968341
MSTRG.969	HzChr02	5960264	5969980	4.54088	0.0670727	0.045875	0.833568	0.937557	-0.304715	0.954622	0.345538	0.720821	XP_021183358.1	zinc finger protein 780A-like [Helicoverpa armigera]
MSTRG.968	HzChr02	5972941	5973263	1.52039	-3.07313	5.25194	0.0414027	0.149647	-0.551226	0.203061	0.660529	0.906894
MSTRG.965	HzChr02	5988040	6004745	4.59891	7.44858	6.33713	0.0249868	0.106214	6.20812	4.34176	0.0564845	0.376515	XP_021180832.1	fibrohexamerin-like isoform X1 [Helicoverpa armigera]
MSTRG.965	HzChr02	5988040	6004745	4.59891	7.44858	6.33713	0.0249868	0.106214	6.20812	4.34176	0.0564845	0.376515	XP_021180833.1	fibrohexamerin-like isoform X2 [Helicoverpa armigera]
MSTRG.967	HzChr02	5993706	5996208	1.05811	0.317702	1.2738	0.278298	0.511125	0.745459	7.12413	0.0185153	0.254108
MSTRG.966	HzChr02	5999573	6002537	0.137616	0.145712	0.0970601	0.772875	0.903301	0.228517	0.257019	0.620182	0.889354
MSTRG.964	HzChr02	6010585	6013504	-2.21278	5.10941	2.53647	0.151602	0.344912	-4.92842	2.36414	0.164392	0.532309
MSTRG.963	HzChr02	6060243	6060696	2.16504	0.933103	4.87192	0.0448552	0.15759	0.651471	2.43858	0.141142	0.500102
MSTRG.962	HzChr02	6064885	6071896	-0.898254	-2.21582	1.15202	0.301729	0.536909	1.09741	0.320541	0.580469	0.871947
MSTRG.960	HzChr02	6072418	6076060	2.93759	-1.47032	5.97739	0.0287054	0.117291	0.311497	0.275111	0.608333	0.883504
MSTRG.961	HzChr02	6074473	6075589	-0.131267	1.63355	0.496868	0.492728	0.715872	1.66155	0.526626	0.480282	0.818275
MSTRG.959	HzChr02	6075949	6077614	-0.993949	-0.631479	0.119499	0.735738	0.880942	2.3027	1.42942	0.255618	0.634331
MSTRG.958	HzChr02	6078797	6079877	-0.654708	0.717397	0.23429	0.636031	0.821084	0.618651	0.174533	0.682608	0.917576
MSTRG.956	HzChr02	6114018	6114575	0.336826	-1.77584	0.502946	0.494976	0.717826	6.72129	2.77249	0.127956	0.485783
MSTRG.955	HzChr02	6118594	6119692	0.00120571	-1.01573	1.45723	0.247697	0.476609	1.12984	2.04696	0.17481	0.541438
MSTRG.947	HzChr02	6120225	6237505	2.24675	0.254176	0.493204	0.494181	0.717074	-0.109239	0.0914985	0.766793	0.948635	XP_021180804.1	CLIP-associating protein isoform X3 [Helicoverpa armigera]
MSTRG.953	HzChr02	6134424	6138928	-1.25696	0.51616	0.077202	0.785993	0.910642	4.91097	3.86184	0.0736802	0.405116
MSTRG.954	HzChr02	6134973	6136714	0.44692	-0.741012	2.89266	0.111402	0.284266	-0.413789	0.954135	0.345486	0.720821
MSTRG.951	HzChr02	6156711	6158352	0.875618	-0.132305	0.183575	0.674933	0.847082	0.487551	2.49247	0.137039	0.495624
MSTRG.950	HzChr02	6160345	6176743	2.66388	-0.282045	2.1793	0.162335	0.360404	0.352951	3.41497	0.0861554	0.427348	XP_021180804.1	CLIP-associating protein isoform X3 [Helicoverpa armigera]
MSTRG.950	HzChr02	6160345	6176743	2.66388	-0.282045	2.1793	0.162335	0.360404	0.352951	3.41497	0.0861554	0.427348	XP_021180806.1	CLIP-associating protein isoform X4 [Helicoverpa armigera]
MSTRG.949	HzChr02	6177350	6190638	-1.07564	-1.14932	0.882137	0.36377	0.599502	1.34791	1.17662	0.296637	0.678984
MSTRG.948	HzChr02	6231893	6233178	0.11072	-0.765985	2.19643	0.160808	0.358017	-1.01184	4.15142	0.0612535	0.385697
MSTRG.946	HzChr02	6273886	6275020	1.57276	-1.34306	3.16525	0.0974786	0.261327	-0.205366	0.0750758	0.788186	0.957908
MSTRG.945	HzChr02	6278675	6279222	2.28455	-0.804801	0.683465	0.422607	0.655473	-0.643259	0.447247	0.514792	0.839216	XP_021182638.1	THAP domain-containing protein 1-like isoform X2 [Helicoverpa armigera]
MSTRG.940	HzChr02	6322703	6349153	0.505358	-5.36127	2.77833	0.122169	0.301125	0.891282	0.210038	0.655165	0.904507
MSTRG.942	HzChr02	6327631	6327954	2.71014	-0.585827	3.07774	0.101564	0.268338	-0.211894	0.425375	0.524995	0.843472
MSTRG.939	HzChr02	6329813	6355643	1.95271	-1.05266	8.24027	0.012488	0.0667568	0.153395	0.182139	0.676126	0.915311	XP_021198662.1	uncharacterized protein LOC110382384 [Helicoverpa armigera]
MSTRG.941	HzChr02	6345333	6346079	0.194272	-0.00947585	2.77652e-05	0.995903	1	7.23336	6.02395	0.0347975	0.317264
MSTRG.937	HzChr02	6351291	6366247	0.241138	-8.80881	13.6517	0.00321295	0.0261657	2.87279	3.11616	0.103676	0.450753	XP_021198662.1	uncharacterized protein LOC110382384 [Helicoverpa armigera]
MSTRG.938	HzChr02	6356038	6364392	2.09482	0.163016	0.370552	0.552595	0.764854	-0.0723802	0.0736372	0.790131	0.957908	XP_021197947.1	cyclin-dependent kinase 6 [Helicoverpa armigera]
MSTRG.934	HzChr02	6365403	6391033	0.441304	0.0334586	0.00135379	0.986286	1	2.81292	11.2487	0.00487088	0.165651	XP_021197943.1	uncharacterized protein LOC110381853 [Helicoverpa armigera]
MSTRG.936	HzChr02	6381496	6381726	8.11792	-1.83029	3.42814	0.0858372	0.241307	-0.920899	0.907508	0.357335	0.729626
MSTRG.935	HzChr02	6383087	6383514	0.536985	-5.98564	33.7082	9.41844e-05	0.002462	-0.323896	0.156757	0.699311	0.922961
MSTRG.932	HzChr02	6412721	6423043	2.89862	-2.76865	23.8482	0.000259464	0.00478011	-0.2255	0.181396	0.676813	0.915533
MSTRG.929	HzChr02	6420731	6435527	6.30782	1.76947	1.58502	0.229136	0.452651	3.2754	5.01954	0.0422464	0.339474	XP_021197942.1	uncharacterized protein LOC110381850 [Helicoverpa armigera]
MSTRG.931	HzChr02	6426663	6427030	5.97308	0	0	1	1	-13.5113	15.4466	0.0047509	0.163957
MSTRG.930	HzChr02	6427070	6427646	-0.539274	-0.0408115	0.000561972	0.98143	1	-0.61219	0.169965	0.686542	0.919336
MSTRG.928	HzChr02	6449843	6450656	0.962997	-0.485289	1.77266	0.204635	0.420391	-0.31928	0.761616	0.397758	0.762653
MSTRG.927	HzChr02	6455376	6456649	1.75004	-0.36274	0.644931	0.435607	0.669152	-0.919513	4.21107	0.0597287	0.383054
MSTRG.926	HzChr02	6470088	6471346	0.0715196	0.183668	0.10361	0.752365	0.889894	0.456004	0.658125	0.430996	0.786201
MSTRG.925	HzChr02	6473629	6474396	0.689542	1.18505	2.66314	0.125497	0.305897	1.51793	4.61494	0.0501188	0.360322
MSTRG.924	HzChr02	6476360	6476731	0.378615	1.01977	0.626682	0.44211	0.674744	0.767899	0.422703	0.526379	0.844358
MSTRG.922	HzChr02	6485341	6486206	3.00313	0.161812	0.135496	0.718443	0.871614	-0.462367	1.12501	0.307242	0.690364
MSTRG.921	HzChr02	6489171	6490104	1.62866	0.777963	5.57416	0.0334994	0.130198	0.686459	4.5046	0.052403	0.366382
MSTRG.920	HzChr02	6519081	6519725	2.32833	4.1887	50.0476	6.37746e-06	0.000442159	1.89127	13.0209	0.00295625	0.136398
MSTRG.918	HzChr02	6553801	6554340	0.0415142	9.05167	14.6826	0.00543791	0.0372548	0	0	1	1
STRG.806	HzChr02	6619073	6619902	-0.739617	7.46194	15.5989	0.00290545	0.0244563	-4.24901	5.73122	0.0384454	0.329442
MSTRG.916	HzChr02	6639841	6673945	1.83786	0.564152	1.37157	0.261525	0.493537	-1.90315	14.2056	0.00215089	0.126182	XP_021188464.1	cysteine dioxygenase type 1 [Helicoverpa armigera]
MSTRG.912	HzChr02	6643531	6718505	9.2597	0.228796	0.177933	0.679721	0.850143	-2.33842	16.8228	0.00113308	0.10846	XP_021188472.1	uncharacterized protein LOC110374888 isoform X3 [Helicoverpa armigera]
MSTRG.917	HzChr02	6653168	6654833	3.84356	-0.111609	0.0256809	0.875028	0.956598	-1.3058	3.344	0.089371	0.431705
MSTRG.915	HzChr02	6691654	6692399	-0.527412	1.86346	2.08326	0.171438	0.373186	-0.0408815	0.00108985	0.974141	1
MSTRG.914	HzChr02	6695866	6696360	1.45818	-2.24839	27.6582	0.000126803	0.00298367	0.158466	0.149852	0.704582	0.92496
MSTRG.910	HzChr02	6698779	6744690	3.96422	-1.42146	1.33299	0.268078	0.499898	0.365844	0.0861552	0.773537	0.951419
MSTRG.911	HzChr02	6708132	6724386	4.15803	-0.236629	1.55185	0.233603	0.458889	-0.136366	0.513866	0.485429	0.820921	XP_021188440.1	RING finger protein 113A [Helicoverpa armigera]
MSTRG.909	HzChr02	6766233	6766475	1.33173	7.68043	11.8014	0.00513868	0.035742	0.807529	0.386475	0.546126	0.854718
MSTRG.907	HzChr02	6769575	6814300	6.7906	-0.236872	0.20303	0.659357	0.837298	-1.76398	10.579	0.00594964	0.176112	XP_021188466.1	mucin-17-like [Helicoverpa armigera]
MSTRG.908	HzChr02	6786315	6787213	2.31817	-1.83083	12.4661	0.00344302	0.0274661	0.00818309	0.000272309	0.987073	1
MSTRG.900	HzChr02	6813351	6861764	5.52821	-3.19494	6.73281	0.0215292	0.0960516	-1.09749	0.917557	0.35477	0.727784
MSTRG.906	HzChr02	6818740	6819080	2.11301	-0.296758	0.299946	0.592756	0.793094	-0.0340311	0.00413399	0.949666	1
MSTRG.905	HzChr02	6822250	6825615	1.46337	-2.25817	4.22168	0.0595658	0.19059	1.30868	1.34822	0.265485	0.644174
MSTRG.904	HzChr02	6831710	6832067	3.8913	1.71361	4.6547	0.0493011	0.167766	0.313808	0.16961	0.68685	0.919336
MSTRG.903	HzChr02	6838337	6839184	-0.0712209	1.0616	1.07967	0.316799	0.55333	-0.293967	0.0908996	0.767573	0.94869
MSTRG.899	HzChr02	6842667	6880415	6.97302	3.34922	18.1347	0.000838484	0.0103042	1.75189	5.72591	0.0316918	0.307492	XP_021196071.1	general odorant-binding protein 56d-like [Helicoverpa armigera]
MSTRG.902	HzChr02	6846439	6849825	1.78383	-1.37745	16.1465	0.0013051	0.0141098	-0.688789	4.14242	0.0615012	0.386132
MSTRG.898	HzChr02	6859379	6886879	-1.26382	0	0	1	1	-0.226453	0.00664345	0.936703	1
MSTRG.897	HzChr02	6905373	6906107	1.19051	-4.5274	4.52961	0.0520346	0.174413	-1.94816	1.00468	0.333611	0.713876
MSTRG.895	HzChr02	6908099	6932921	2.5262	0.535429	1.76121	0.206182	0.422256	0.0991465	0.0613339	0.808076	0.964752	XP_021196045.1	uncharacterized protein LOC110380401 [Helicoverpa armigera]
MSTRG.896	HzChr02	6919562	6920263	2.83508	-1.0953	4.32582	0.0568825	0.184555	-0.0732285	0.0216193	0.885253	0.991903
MSTRG.892	HzChr02	6934814	6964954	2.21661	-0.0780586	0.197106	0.663951	0.84047	0.274847	2.43394	0.141373	0.500512	XP_021196046.1	uncharacterized protein LOC110380402 [Helicoverpa armigera]
MSTRG.894	HzChr02	6941558	6941957	3.98051	-0.684108	5.4054	0.0360205	0.136912	0.567835	3.75851	0.073463	0.404303
MSTRG.891	HzChr02	6947542	6966962	4.60186	0.590275	1.54493	0.234805	0.460343	0.424156	0.817706	0.381528	0.750722
MSTRG.893	HzChr02	6948876	6954811	-0.77893	0.540544	0.135217	0.71872	0.871614	-2.18312	2.01349	0.178327	0.545413
MSTRG.890	HzChr02	6968315	6968542	2.89059	-12.1869	10.2221	0.0134206	0.0701887	8.29472	4.4927	0.0684061	0.396248
MSTRG.889	HzChr02	6981323	6983877	1.5235	-0.380135	2.51613	0.135333	0.321237	0.0231792	0.00935594	0.924335	1
MSTRG.887	HzChr02	6988571	6988905	2.60142	3.25212	9.16436	0.00926513	0.0538183	-0.344319	0.118856	0.735531	0.937306
MSTRG.886	HzChr02	7006525	7006891	0.867376	0.830477	0.43728	0.51944	0.737951	1.54562	1.82667	0.198486	0.569383
MSTRG.885	HzChr02	7012452	7020418	7.15947	0.112706	0.033602	0.85725	0.948057	-0.850385	1.87383	0.193134	0.564015	XP_021196056.1	cytochrome P450 6B6-like [Helicoverpa armigera]
MSTRG.884	HzChr02	7021778	7022476	2.31507	-1.91807	19.927	0.000562331	0.00789883	-0.733506	3.14225	0.0985014	0.445997
MSTRG.883	HzChr02	7023289	7023920	-0.383979	-4.92088	12.2126	0.00461327	0.0332261	-0.434403	0.137597	0.717335	0.930863
MSTRG.882	HzChr02	7031963	7047263	6.53502	-0.669071	7.37215	0.0170354	0.0823197	-0.478718	3.78559	0.0725467	0.404024	XP_021196049.1	protein ERGIC-53 [Helicoverpa armigera]
STRG.779	HzChr02	7049605	7050730	-0.683641	-1.63821	5.37913	0.0362534	0.137555	1.093	2.47945	0.137988	0.496653	XP_021196050.1	uncharacterized protein LOC110380408 [Helicoverpa armigera]
MSTRG.881	HzChr02	7052692	7057805	3.56723	0.519606	1.17969	0.29622	0.530382	1.24756	6.84795	0.0206302	0.266139	XP_021196070.1	aldo-keto reductase AKR2E4-like isoform X2 [Helicoverpa armigera]
MSTRG.871	HzChr02	7060744	7224931	5.27179	0.546758	1.05624	0.321935	0.55853	1.74733	10.392	0.00629743	0.179838	XP_021196059.1	protein C21orf2 homolog isoform X3 [Helicoverpa armigera]
MSTRG.871	HzChr02	7060744	7224931	5.27179	0.546758	1.05624	0.321935	0.55853	1.74733	10.392	0.00629743	0.179838	XP_021196061.1	uncharacterized protein LOC110380414 isoform X5 [Helicoverpa armigera]
MSTRG.871	HzChr02	7060744	7224931	5.27179	0.546758	1.05624	0.321935	0.55853	1.74733	10.392	0.00629743	0.179838	XP_021196063.1	uncharacterized protein LOC110380414 isoform X7 [Helicoverpa armigera]
MSTRG.871	HzChr02	7060744	7224931	5.27179	0.546758	1.05624	0.321935	0.55853	1.74733	10.392	0.00629743	0.179838	XP_021196070.1	aldo-keto reductase AKR2E4-like isoform X2 [Helicoverpa armigera]
MSTRG.880	HzChr02	7067027	7067477	2.17363	-0.106283	0.00221474	0.963146	0.994074	0.888605	0.392754	0.541191	0.852369
MSTRG.879	HzChr02	7067675	7072796	-0.347552	-0.00356262	1.78947e-05	0.996686	1	1.7908	1.36719	0.262301	0.640679	XP_021180777.1	uncharacterized protein LOC110369612 [Helicoverpa armigera]
MSTRG.878	HzChr02	7089870	7098136	1.63661	0.46982	1.79431	0.202051	0.416602	0.44738	1.64488	0.220787	0.595442	XP_021196054.1	polypeptide N-acetylgalactosaminyltransferase 1-like [Helicoverpa armigera]
MSTRG.877	HzChr02	7101089	7101869	-1.02681	-6.60383	3.35708	0.105953	0.275626	6.89599	3.41004	0.103672	0.450753
MSTRG.876	HzChr02	7102246	7103029	-0.991311	-1.16856	0.30014	0.594131	0.79436	0.952286	0.196427	0.665734	0.909504
MSTRG.874	HzChr02	7123340	7139203	1.94027	-0.0547068	0.0550415	0.817958	0.928692	0.361443	2.37141	0.146192	0.507164	XP_021196055.1	vacuolar protein sorting-associated protein 53 homolog [Helicoverpa armigera]
MSTRG.872	HzChr02	7152221	7210708	13.048	-0.0968141	0.192282	0.667812	0.843138	-0.47784	4.66369	0.0489162	0.358081	XP_021196067.1	40S ribosomal protein S21 isoform X1 [Helicoverpa armigera]
MSTRG.873	HzChr02	7190721	7191281	-0.336074	-1.61255	1.24159	0.284392	0.518149	0.319364	0.050828	0.824968	0.970583
MSTRG.1894	HzChr03	1206	940	1.01925	-2.80335	3.01756	0.104857	0.274033	-3.64981	4.45906	0.0536553	0.369702	XP_021187675.1	uncharacterized protein LOC110374331 [Helicoverpa armigera]
MSTRG.1890	HzChr03	13486	7816	0.226906	-2.36692	6.00537	0.0283939	0.116496	-1.32784	2.0861	0.171197	0.53872
MSTRG.1888	HzChr03	35135	49477	-0.480496	0.944068	0.321486	0.579917	0.784986	-1.84613	1.17277	0.297585	0.679456
MSTRG.1887	HzChr03	50462	54640	1.24091	-2.14692	25.0587	0.000201032	0.0039853	0.432463	1.13334	0.305342	0.687763	XP_021187459.1	fat-like cadherin-related tumor suppressor homolog, partial [Helicoverpa armigera]
MSTRG.1887	HzChr03	50462	54640	1.24091	-2.14692	25.0587	0.000201032	0.0039853	0.432463	1.13334	0.305342	0.687763	XP_021192612.1	LOW QUALITY PROTEIN: uncharacterized protein LOC110377889, partial [Helicoverpa armigera]
MSTRG.1885	HzChr03	69441	75757	1.33528	-0.398642	0.200885	0.661036	0.838805	0.324264	0.133105	0.720822	0.931547	XP_021191341.1	kelch-like protein diablo [Helicoverpa armigera]
MSTRG.1884	HzChr03	77451	80725	0.0463898	-1.00175	0.215008	0.650175	0.830683	0.881517	0.173223	0.683731	0.917942	XP_021195717.1	uncharacterized protein LOC110380149 [Helicoverpa armigera]
MSTRG.1883	HzChr03	101807	106760	-0.518904	-3.38185	2.66398	0.12548	0.305897	0.355904	0.0364534	0.851392	0.978774	XP_021195713.1	transcription factor Adf-1-like isoform X1 [Helicoverpa armigera]
MSTRG.1881	HzChr03	180536	90568	4.78051	0.659871	1.50483	0.240661	0.467871	2.3083	16.9132	0.00110933	0.10846	XP_021195708.1	uncharacterized protein LOC110380141 isoform X1 [Helicoverpa armigera]
MSTRG.1881	HzChr03	180536	90568	4.78051	0.659871	1.50483	0.240661	0.467871	2.3083	16.9132	0.00110933	0.10846	XP_021195710.1	high mobility group protein D-like [Helicoverpa armigera]
MSTRG.1880	HzChr03	209402	213901	1.36471	-0.630794	5.85022	0.0300091	0.121205	0.460598	3.1768	0.0967011	0.44319
MSTRG.1879	HzChr03	222744	224122	0.601515	-0.302262	0.552727	0.469678	0.697519	0.148078	0.134622	0.719253	0.931547
MSTRG.1876	HzChr03	252887	256918	2.68243	-0.645609	8.68019	0.0107631	0.0598128	0.0418622	0.0365732	0.851122	0.97861
MSTRG.1875	HzChr03	257008	259879	4.96477	0.428125	0.278975	0.605852	0.801209	1.86667	4.9809	0.0429344	0.340736	XP_021195719.1	protein charybde-like [Helicoverpa armigera]
MSTRG.1873	HzChr03	291139	294368	-1.88483	0	0	1	1	-1.47877	0.313024	0.591817	0.876932
MSTRG.1872	HzChr03	298546	299361	2.25926	1.31172	17.0331	0.00105672	0.0122106	0.764134	5.82256	0.0303389	0.301875
MSTRG.1870	HzChr03	328785	331630	0.202664	-0.889526	1.89368	0.190714	0.400428	-0.876063	1.80552	0.200729	0.571921
MSTRG.1868	HzChr03	362261	378275	-1.02445	7.95926	7.25274	0.0232446	0.101096	5.22924	3.3966	0.0961952	0.442573
MSTRG.1864	HzChr03	489692	490974	0.454653	-0.453134	0.903445	0.358214	0.594882	0.399871	0.705288	0.415328	0.775451
MSTRG.1862	HzChr03	491346	556055	2.14047	0.334223	0.477578	0.501101	0.723553	-0.389249	0.628407	0.441496	0.792699	XP_021195835.1	nucleolar pre-ribosomal-associated protein 1 [Helicoverpa armigera]
MSTRG.1862	HzChr03	491346	556055	2.14047	0.334223	0.477578	0.501101	0.723553	-0.389249	0.628407	0.441496	0.792699	XP_021195842.1	U5 small nuclear ribonucleoprotein 40 kDa protein [Helicoverpa armigera]
MSTRG.1862	HzChr03	491346	556055	2.14047	0.334223	0.477578	0.501101	0.723553	-0.389249	0.628407	0.441496	0.792699	XP_021195850.1	uncharacterized protein LOC110380251 isoform X2 [Helicoverpa armigera]
MSTRG.1862	HzChr03	491346	556055	2.14047	0.334223	0.477578	0.501101	0.723553	-0.389249	0.628407	0.441496	0.792699	XP_021195851.1	stimulator of interferon genes protein-like isoform X3 [Helicoverpa armigera]
MSTRG.1862	HzChr03	491346	556055	2.14047	0.334223	0.477578	0.501101	0.723553	-0.389249	0.628407	0.441496	0.792699	XP_021195852.1	uncharacterized protein LOC110380251 isoform X4 [Helicoverpa armigera]
MSTRG.1862	HzChr03	491346	556055	2.14047	0.334223	0.477578	0.501101	0.723553	-0.389249	0.628407	0.441496	0.792699	XP_021195855.1	stimulator of interferon genes protein [Helicoverpa armigera]
MSTRG.1863	HzChr03	493569	496241	3.0164	-0.329017	3.12353	0.0992694	0.264224	-0.308302	2.71016	0.122291	0.4774	XP_021195841.1	nucleoporin-like protein 2 [Helicoverpa armigera]
MSTRG.1860	HzChr03	522890	614390	0.941013	1.08016	1.70497	0.213209	0.43151	0.713654	0.842096	0.374722	0.743992	XP_021195844.1	uncharacterized protein LOC110380248 [Helicoverpa armigera]
MSTRG.1861	HzChr03	608358	608605	2.77248	0.101724	0.0101686	0.921143	0.979064	-0.0207415	0.000423326	0.983882	1
MSTRG.1859	HzChr03	614621	618512	0.810565	0.148516	0.0127651	0.911688	0.975161	0.32123	0.0591407	0.811474	0.966373	XP_021195839.1	CDK5 regulatory subunit-associated protein 1 [Helicoverpa armigera]
MSTRG.1858	HzChr03	618788	622988	3.18875	-0.906717	27.9417	0.000120811	0.00288455	0.028963	0.0289503	0.867364	0.985196
MSTRG.1857	HzChr03	622692	625993	7.02078	-0.47355	3.18066	0.0967453	0.260337	-0.394664	2.20926	0.159904	0.526087
MSTRG.1856	HzChr03	626481	648313	4.09943	-1.37592	7.50438	0.0162673	0.0799188	-0.818022	2.68957	0.12383	0.479506	XP_021195860.1	probable 3-hydroxyacyl-CoA dehydrogenase B0272 3 isoform X1 [Helicoverpa armigera]
MSTRG.1855	HzChr03	639963	659110	2.93469	-0.171336	0.684648	0.422072	0.654957	0.952255	20.8824	0.000453127	0.0793891	XP_021195859.1	AN1-type zinc finger protein 4-like [Helicoverpa armigera]
MSTRG.1854	HzChr03	662358	664098	4.56387	-0.0184105	0.00938724	0.924209	0.980554	-0.0218617	0.013217	0.910129	0.999223
MSTRG.1852	HzChr03	695910	697071	-0.219329	0.734593	2.18891	0.161476	0.358974	0.437857	0.790271	0.389255	0.75742
MSTRG.1816	HzChr03	1356954	1419171	2.39124	0.00104648	3.73601e-05	0.995211	1	-0.35149	4.16116	0.0609866	0.385495	XP_021198231.1	Golgi-specific brefeldin A-resistance guanine nucleotide exchange factor 1-like isoform X2 [Helicoverpa armigera]
MSTRG.1819	HzChr03	1369343	1370542	-1.2617	2.0294	1.92096	0.187744	0.395789	1.23842	0.765566	0.396569	0.761491
MSTRG.1818	HzChr03	1374288	1375316	0.427015	1.63719	7.16294	0.0182556	0.0860044	0.651861	1.13301	0.305409	0.687794
MSTRG.1815	HzChr03	1419230	1448650	2.06247	-0.940876	0.332566	0.573536	0.779394	2.39589	2.05696	0.174014	0.540382	XP_021199754.1	frizzled-10-like [Helicoverpa armigera]
MSTRG.1814	HzChr03	1479980	1480768	5.25491	9.50527	3.69375	0.0793971	0.229159	0.409408	0.0288407	0.868059	0.985196
MSTRG.1813	HzChr03	1494205	1507275	-0.040854	1.00572	3.4925	0.083025	0.235996	-0.529424	0.955215	0.345222	0.720821	XP_021199153.1	activating signal cointegrator 1 complex subunit 2-like [Helicoverpa armigera]
MSTRG.1812	HzChr03	1507500	1542086	3.89309	0.423295	2.54599	0.133324	0.318646	0.446131	2.80594	0.116527	0.466984	XP_021199154.1	uncharacterized protein LOC110382787 [Helicoverpa armigera]
MSTRG.1811	HzChr03	1544143	1557279	-1.12443	3.41026	1.6453	0.224521	0.447248	3.19709	1.78419	0.207132	0.578426	XP_021197454.1	fatty-acid amide hydrolase 2-A-like, partial [Helicoverpa armigera]
MSTRG.1803	HzChr03	1565043	1638472	6.41105	-1.67957	25.8409	0.000180073	0.0036766	-0.332642	1.06144	0.320789	0.703847	XP_021197447.1	phosphoglucomutase [Helicoverpa armigera]
MSTRG.1803	HzChr03	1565043	1638472	6.41105	-1.67957	25.8409	0.000180073	0.0036766	-0.332642	1.06144	0.320789	0.703847	XP_021197450.1	fatty-acid amide hydrolase 2-like [Helicoverpa armigera]
MSTRG.1809	HzChr03	1599975	1601241	-0.277306	0.768498	1.81668	0.199425	0.413229	0.354422	0.381347	0.546941	0.855134
MSTRG.1808	HzChr03	1602001	1603243	-1.41603	-0.229588	0.0258452	0.874999	0.956598	-4.40167	5.80253	0.0333031	0.311395
MSTRG.1807	HzChr03	1603622	1613624	-0.846967	0.109341	0.0207749	0.887478	0.963249	0.170669	0.0502045	0.825992	0.970982
MSTRG.1806	HzChr03	1613891	1614955	0.319506	3.03586	7.66443	0.0153729	0.0769088	-1.62709	2.29954	0.152216	0.514187
MSTRG.1805	HzChr03	1614802	1616788	5.51504	-0.473836	9.06132	0.00948874	0.0546762	-0.252038	2.56394	0.131966	0.489661
MSTRG.1802	HzChr03	1636201	1639060	-0.781353	-0.465351	0.527293	0.479886	0.70557	-0.359064	0.303679	0.590398	0.876806
MSTRG.1801	HzChr03	1639929	1702134	2.85506	3.70943	5.79814	0.0307982	0.123126	1.38762	0.986586	0.337854	0.7168
MSTRG.1798	HzChr03	1648929	1758093	2.85804	1.33618	26.4534	0.00015639	0.00336252	-0.231788	0.832252	0.377287	0.746721	XP_021197445.1	sialin [Helicoverpa armigera]
MSTRG.1800	HzChr03	1708307	1709395	0.896368	-1.58926	14.8943	0.00177938	0.0173848	0.0782732	0.0380128	0.848259	0.977479
MSTRG.1799	HzChr03	1725165	1726521	-1.47571	-2.07223	0.793833	0.390965	0.626649	0.878421	0.145931	0.709328	0.926213
MSTRG.1786	HzChr03	1781666	1946682	-1.37714	1.0602	0.245186	0.628357	0.816101	0.00596846	9.01565e-06	0.997648	1	XP_021199809.1	rho-related GTP-binding protein RhoE-like, partial [Helicoverpa armigera]
MSTRG.1797	HzChr03	1791281	1791652	2.41768	1.44788	1.10423	0.31158	0.547609	-0.616693	0.206429	0.656719	0.904916
MSTRG.1796	HzChr03	1793251	1793553	1.71558	3.82455	2.28135	0.153727	0.347884	-0.710806	0.0922518	0.765912	0.948635
MSTRG.1794	HzChr03	1822390	1826296	1.03207	0.888413	2.68859	0.123721	0.303205	-0.335763	0.40186	0.536526	0.850274
MSTRG.1787	HzChr03	1941628	1942321	1.08286	-7.13244	3.71733	0.0785633	0.227678	-0.48405	0.0494103	0.82794	0.971365
MSTRG.1785	HzChr03	1952470	1952832	5.34345	4.56933	26.1722	0.000169781	0.00353436	-0.416607	0.302553	0.59117	0.876932
STRG.1579	HzChr03	1979837	1980199	2.36025	2.7469	26.392	0.000163324	0.00346524	0.313643	0.394942	0.540083	0.852058
MSTRG.1783	HzChr03	1983462	2008465	3.83167	0.107474	0.103533	0.752502	0.889894	0.537772	2.6013	0.129639	0.487461
MSTRG.1781	HzChr03	2024345	2082262	0.991843	1.37694	7.09746	0.0186976	0.087514	-0.979733	3.52324	0.0818238	0.421081	XP_021195625.1	aladin-like [Helicoverpa armigera]
MSTRG.1780	HzChr03	2084085	2085970	1.36772	-0.680073	2.82679	0.11519	0.290158	-0.232544	0.310362	0.586383	0.875324
MSTRG.1779	HzChr03	2134026	2134427	3.07666	1.79816	19.8711	0.000574156	0.00801727	1.07924	7.47295	0.01645	0.243321
MSTRG.1778	HzChr03	2161090	2166288	2.60538	1.16325	3.26425	0.0928835	0.253683	-0.387846	0.349908	0.56383	0.863271
MSTRG.1776	HzChr03	2169436	2172151	2.17155	4.26664	13.2181	0.00280273	0.0239004	-1.72144	2.31181	0.151207	0.512423
MSTRG.1775	HzChr03	2174529	2182555	5.58049	-0.0955439	0.230439	0.63872	0.822507	0.191309	0.921733	0.353544	0.72697
MSTRG.1774	HzChr03	2183104	2200287	4.02633	-0.220953	0.889568	0.36182	0.598112	0.133152	0.323149	0.578858	0.871593	XP_021195609.1	GMP synthase [glutamine-hydrolyzing], partial [Helicoverpa armigera]
MSTRG.1773	HzChr03	2202679	2210159	3.02516	0.980541	7.97046	0.0137819	0.0714156	-0.092097	0.071644	0.792946	0.959364	XP_021199906.1	protein phosphatase 1 regulatory subunit 7 [Helicoverpa armigera]
MSTRG.1772	HzChr03	2211769	2223395	3.3492	0.109908	0.107858	0.747574	0.887664	0.850086	6.36147	0.0247444	0.282303	XP_021199905.1	fumarylacetoacetase-like [Helicoverpa armigera]
MSTRG.1772	HzChr03	2211769	2223395	3.3492	0.109908	0.107858	0.747574	0.887664	0.850086	6.36147	0.0247444	0.282303	XP_021199907.1	fumarylacetoacetase-like [Helicoverpa armigera]
MSTRG.1771	HzChr03	2223612	2228553	2.92684	0.361352	4.57608	0.0508011	0.17161	-0.0993279	0.347781	0.564906	0.863476
MSTRG.1770	HzChr03	2228709	2234853	1.35554	-1.93584	2.05546	0.17416	0.376778	0.10448	0.0065985	0.936437	1	XP_021197408.1	uncharacterized protein LOC110381406 [Helicoverpa armigera]
MSTRG.1769	HzChr03	2236196	2236638	0.12536	2.74072	5.46411	0.0351954	0.134525	-1.12425	0.857898	0.370408	0.740465
MSTRG.1767	HzChr03	2247636	2260945	3.64723	-0.349901	4.71387	0.0478737	0.164158	0.1884	1.3619	0.262983	0.641385	XP_021190955.1	zinc finger protein 266-like [Helicoverpa armigera]
MSTRG.1764	HzChr03	2261314	2375457	3.46534	0.374895	0.642481	0.43654	0.669783	0.204784	0.190987	0.668928	0.911089	XP_021190933.1	H/ACA ribonucleoprotein complex non-core subunit NAF1 isoform X3 [Helicoverpa armigera]
MSTRG.1764	HzChr03	2261314	2375457	3.46534	0.374895	0.642481	0.43654	0.669783	0.204784	0.190987	0.668928	0.911089	XP_021190952.1	inositol-3-phosphate synthase-like, partial [Helicoverpa armigera]
MSTRG.1766	HzChr03	2270055	2271533	0.0701442	-0.592163	0.705793	0.415166	0.649056	0.891426	1.61059	0.225401	0.601655
MSTRG.1765	HzChr03	2277106	2300755	0.344952	0.514683	0.636981	0.438328	0.671424	1.09143	2.83648	0.114623	0.464734	XP_021190954.1	longitudinals lacking protein, isoforms H/M/V-like [Helicoverpa armigera]
MSTRG.1763	HzChr03	2320612	2522987	0.205014	-0.51807	0.803088	0.385541	0.621361	0.739502	1.62272	0.223755	0.599986	XP_021190929.1	atypical protein kinase C [Helicoverpa armigera]
MSTRG.1761	HzChr03	2473405	2555702	8.82556	0.0264828	0.0260348	0.874154	0.956245	-0.199611	1.47778	0.244514	0.623548	XP_021198242.1	eukaryotic translation initiation factor 5A [Helicoverpa armigera]
MSTRG.1762	HzChr03	2523408	2530610	5.68311	-0.192694	2.30653	0.15141	0.344727	0.0321289	0.0640646	0.803916	0.963287
MSTRG.1757	HzChr03	2600536	2600987	-0.410171	5.29867	11.8609	0.00661946	0.0425701	0	0	1	1
MSTRG.1756	HzChr03	2611183	2614564	-1.11051	7.07364	4.03354	0.0733835	0.218294	-0.0937739	0.00135202	0.971418	1
MSTRG.1752	HzChr03	2637438	2668294	0.71311	-0.0630355	0.0197613	0.890238	0.964722	-0.403015	0.808381	0.384023	0.752324	XP_021198235.1	chromosome transmission fidelity protein 18 homolog [Helicoverpa armigera]
MSTRG.1751	HzChr03	2670457	2672283	-0.972207	0.679745	0.641953	0.436586	0.669783	0.105995	0.0157461	0.901951	0.996573
MSTRG.1750	HzChr03	2679350	2679753	4.47541	0.129458	0.0815975	0.779431	0.907415	0.159033	0.122853	0.731308	0.935784
MSTRG.1748	HzChr03	2698242	2699617	0.574173	-1.31421	1.28005	0.277367	0.51037	0.0496252	0.00196271	0.965305	1
MSTRG.1747	HzChr03	2702093	2707422	6.4653	-0.0650483	0.0884308	0.770631	0.90205	-0.0808816	0.136741	0.717181	0.930756
MSTRG.1746	HzChr03	2709361	2711480	2.28966	3.06698	7.24785	0.0178304	0.0846416	-2.51714	4.77894	0.0467528	0.351391
MSTRG.1745	HzChr03	2711705	2712214	1.08457	0.894394	1.72409	0.210805	0.428181	-0.493565	0.564122	0.465352	0.809097
MSTRG.1744	HzChr03	2713279	2714970	-0.463922	-0.502684	1.11032	0.310117	0.546361	-0.00155678	1.12401e-05	0.997373	1
MSTRG.1743	HzChr03	2723750	2745125	0.355367	0.194194	0.444473	0.515966	0.734868	0.19611	0.442703	0.51679	0.840031	XP_021196192.1	uncharacterized protein LOC110380518 [Helicoverpa armigera]
MSTRG.1706	HzChr03	3017474	3265791	4.38509	-0.67111	2.09629	0.170226	0.371545	0.0354542	0.00590759	0.939849	1	XP_021192382.1	beta-1,4-N-acetylgalactosaminyltransferase bre-4-like [Helicoverpa armigera]
MSTRG.1706	HzChr03	3017474	3265791	4.38509	-0.67111	2.09629	0.170226	0.371545	0.0354542	0.00590759	0.939849	1	XP_021196200.1	coiled-coil domain-containing protein 47 [Helicoverpa armigera]
MSTRG.1708	HzChr03	3169435	3227257	-1.29448	-7.30095	4.58097	0.0662705	0.204571	0.0979341	0.0015651	0.969455	1
MSTRG.1707	HzChr03	3256999	3257309	2.54669	-3.18408	9.0379	0.00965428	0.0554576	-0.484075	0.246993	0.627105	0.892749
MSTRG.1705	HzChr03	3265639	3265984	2.17436	-4.11782	21.8485	0.000382313	0.00614968	1.03488	1.77086	0.20507	0.576231	XP_021192383.1	uncharacterized protein LOC110377717 [Helicoverpa armigera]
MSTRG.1702	HzChr03	3280561	3312373	1.80245	0.227168	0.479742	0.500032	0.722487	0.0890502	0.0730379	0.790964	0.958398	XP_021192376.1	uncharacterized protein LOC110377711 [Helicoverpa armigera]
MSTRG.1703	HzChr03	3303869	3304434	-0.526186	0.263379	0.0112163	0.917457	0.977463	5.73979	2.55586	0.136625	0.495335
MSTRG.1701	HzChr03	3314749	3318600	-1.17727	6.6859	4.29379	0.0735561	0.218628	0	0	1	1
MSTRG.1697	HzChr03	3333935	3392553	-1.46886	5.24957	2.97912	0.124316	0.304163	-4.83609	2.55299	0.150447	0.511016
MSTRG.1696	HzChr03	3404203	3407415	6.85991	-0.278039	8.35508	0.0120088	0.0647687	0.0294587	0.0937342	0.764054	0.94797
MSTRG.1695	HzChr03	3408660	3421911	0.553039	-0.0519704	0.0114963	0.916157	0.97679	0.474368	0.929361	0.351623	0.725995	XP_021192334.1	mitochondrial carrier protein Rim2 isoform X2 [Helicoverpa armigera]
MSTRG.1694	HzChr03	3421881	3422987	4.96299	0.153284	1.00665	0.332981	0.570365	0.0268985	0.0308341	0.863162	0.98386
MSTRG.1693	HzChr03	3425559	3442012	3.70517	-1.03189	2.15156	0.165074	0.364214	-1.25289	3.11555	0.0998891	0.445997	XP_021192327.1	1,4-alpha-glucan-branching enzyme [Helicoverpa armigera]
MSTRG.1692	HzChr03	3443627	3444600	6.36229	-0.000999849	2.11818e-05	0.996394	1	-0.307213	1.99381	0.180189	0.547491
MSTRG.1691	HzChr03	3444801	3484499	1.59031	-0.0346467	0.00607022	0.939019	0.986623	0.0990775	0.0502396	0.825938	0.970982	XP_021192337.1	NAD kinase-like isoform X1 [Helicoverpa armigera]
MSTRG.1691	HzChr03	3444801	3484499	1.59031	-0.0346467	0.00607022	0.939019	0.986623	0.0990775	0.0502396	0.825938	0.970982	XP_021192338.1	NAD kinase-like isoform X2 [Helicoverpa armigera]
MSTRG.1691	HzChr03	3444801	3484499	1.59031	-0.0346467	0.00607022	0.939019	0.986623	0.0990775	0.0502396	0.825938	0.970982	XP_021192340.1	NAD kinase-like isoform X4 [Helicoverpa armigera]
MSTRG.1691	HzChr03	3444801	3484499	1.59031	-0.0346467	0.00607022	0.939019	0.986623	0.0990775	0.0502396	0.825938	0.970982	XP_021192341.1	NAD kinase-like isoform X5 [Helicoverpa armigera]
MSTRG.1689	HzChr03	3486419	3513817	2.26936	-0.159341	0.249365	0.625391	0.814484	0.230236	0.522326	0.481923	0.819059	XP_021192332.1	6-phosphofructo-2-kinase/fructose-2,6-bisphosphatase-like isoform X2 [Helicoverpa armigera]
MSTRG.1688	HzChr03	3520579	3524394	0.297132	0.546438	0.141423	0.712648	0.867883	0.134636	0.00864014	0.927291	1	XP_021192369.1	PI-PLC X domain-containing protein 3 isoform X2 [Helicoverpa armigera]
MSTRG.1687	HzChr03	3533087	3534989	9.55516	-0.190151	0.799674	0.386525	0.622367	0.369579	3.01411	0.104808	0.452295
MSTRG.1686	HzChr03	3537586	3547997	2.33526	0.119643	0.631411	0.440294	0.673177	-0.0999901	0.441128	0.517525	0.840184
MSTRG.1682	HzChr03	3588102	3590834	5.17578	0.145169	1.56466	0.231781	0.456278	-0.157419	1.83693	0.197085	0.567446	XP_021192347.1	transcription factor A, mitochondrial-like [Helicoverpa armigera]
MSTRG.1681	HzChr03	3593173	3601518	4.84608	0.0825367	0.300713	0.592199	0.79265	0.351266	5.44417	0.0353065	0.318988
MSTRG.1680	HzChr03	3605689	3606458	0.105333	0.871545	1.77174	0.204745	0.420551	0.179558	0.0759351	0.786968	0.957592
MSTRG.1679	HzChr03	3609237	3610496	-0.389617	1.35782	0.436911	0.519614	0.738036	1.21095	0.317145	0.582458	0.873439
MSTRG.1678	HzChr03	3610807	3611328	-0.86132	2.49073	0.914065	0.355659	0.592688	-1.09912	0.193749	0.666701	0.909924
MSTRG.1677	HzChr03	3611451	3612889	-1.33402	3.05535	3.36335	0.0883577	0.245858	0.71511	0.207892	0.655532	0.904722
MSTRG.1675	HzChr03	3615749	3620391	0.233207	0.275831	0.709947	0.41383	0.647514	-0.252025	0.578298	0.45978	0.804885
MSTRG.1673	HzChr03	3621134	3621624	-0.130877	0.312627	0.10016	0.756415	0.892756	0.927174	0.873263	0.366258	0.737179
MSTRG.1672	HzChr03	3622777	3623487	-0.29752	2.82271	1.57328	0.234302	0.459704	-0.115933	0.00275905	0.958999	1
MSTRG.1671	HzChr03	3625242	3627115	-1.60324	-0.70626	0.0832328	0.777296	0.905906	-0.150946	0.00389914	0.951115	1
MSTRG.1670	HzChr03	3635652	3643513	-1.1496	0.0781329	0.019052	0.892212	0.965291	-0.203292	0.124406	0.729634	0.935083
MSTRG.1669	HzChr03	3643587	3657063	0.0476601	0.22099	0.0794317	0.782263	0.908966	0.497152	0.348337	0.564622	0.863437	XP_021192359.1	uncharacterized protein LOC110377703 isoform X2 [Helicoverpa armigera]
MSTRG.1666	HzChr03	3663706	3670202	-0.918993	7.34935	11.9411	0.0148797	0.0751815	0	0	1	1	XP_021192361.1	SET and MYND domain-containing protein 4-like isoform X2 [Helicoverpa armigera]
MSTRG.1665	HzChr03	3670256	3726162	7.45007	-0.225751	0.142823	0.7113	0.866893	-0.542986	0.818624	0.381268	0.75038	XP_021192336.1	uncharacterized protein LOC110377692 [Helicoverpa armigera]
MSTRG.1665	HzChr03	3670256	3726162	7.45007	-0.225751	0.142823	0.7113	0.866893	-0.542986	0.818624	0.381268	0.75038	XP_021192364.1	uncharacterized protein LOC110377706, partial [Helicoverpa armigera]
MSTRG.1662	HzChr03	3811423	3816948	-0.918432	5.33846	8.18546	0.017417	0.0833209	2.27604	2.4523	0.149342	0.510024	XP_021197577.1	uncharacterized protein LOC110381564 [Helicoverpa armigera]
MSTRG.1661	HzChr03	3862143	3865111	3.35033	-3.03552	8.38061	0.0120096	0.0647687	3.57412	11.1887	0.00496039	0.16618	XP_021197866.1	LOW QUALITY PROTEIN: uncharacterized protein LOC110381787, partial [Helicoverpa armigera]
MSTRG.1660	HzChr03	3896268	3977217	-0.224958	-0.660445	0.508344	0.487785	0.711696	1.05495	1.3042	0.272953	0.651467
MSTRG.1659	HzChr03	3977285	3982383	-1.04508	0.0902272	0.00587082	0.940025	0.987055	1.86661	2.28062	0.153559	0.516077
MSTRG.1658	HzChr03	3987224	3990697	0.110918	0.292798	0.0933634	0.765332	0.897972	1.64001	2.71522	0.126067	0.482933
MSTRG.1654	HzChr03	4012798	4070281	0.108274	0.667131	0.0844478	0.777504	0.905906	8.1239	4.93993	0.0513892	0.363461	XP_021194417.1	uncharacterized protein LOC110379198 [Helicoverpa armigera]
MSTRG.1655	HzChr03	4025709	4027099	1.55366	0.725888	1.61976	0.224369	0.447089	-0.542974	0.743895	0.403309	0.766278
MSTRG.1653	HzChr03	4088812	4094834	0.751791	1.47138	6.579	0.022658	0.0994116	1.78106	10.2777	0.00644812	0.181613
MSTRG.1649	HzChr03	4183489	4187538	0.690011	-0.625347	0.273308	0.609499	0.803473	1.03555	0.981378	0.339089	0.717195	XP_021194420.1	carboxylesterase 1E [Helicoverpa armigera]
MSTRG.1648	HzChr03	4186681	4253212	1.11683	0.189372	0.0328265	0.858887	0.948976	0.118112	0.0133574	0.909672	0.999081	XP_021194421.1	MOXD1 homolog 1-like [Helicoverpa armigera]
MSTRG.1647	HzChr03	4258147	4263437	0.34298	2.71239	3.49762	0.0830454	0.235996	-0.632482	0.152677	0.702018	0.923995	XP_021183516.1	uncharacterized protein K02A2 6-like [Helicoverpa armigera]
MSTRG.1646	HzChr03	4296039	4298592	-0.620964	5.33324	35.3199	0.000154825	0.00334551	3.62763	13.0135	0.0162442	0.243321
MSTRG.1645	HzChr03	4307760	4311099	2.34922	1.48273	10.5463	0.00600434	0.0396366	0.00384977	7.54376e-05	0.993196	1
MSTRG.1644	HzChr03	4324684	4325770	0.691373	2.44985	20.9984	0.00044241	0.00677996	-0.0685671	0.0185809	0.893544	0.993937
MSTRG.1641	HzChr03	4333593	4334540	3.74216	11.9044	33.9462	9.12868e-05	0.00243525	-2.75509	3.27967	0.095973	0.442244
MSTRG.1638	HzChr03	4388790	4389190	2.49161	10.4532	7.445	0.0187389	0.0875496	0.178899	0.00730825	0.933324	1
STRG.1451	HzChr03	4497764	4498360	0.786441	0.461004	0.39765	0.538716	0.753725	0.717889	0.913384	0.355832	0.72881
STRG.1449	HzChr03	4559776	4560252	-1.38113	-5.23119	2.23745	0.166652	0.366135	5.14011	2.0184	0.186881	0.557247	XP_021194499.1	uncharacterized protein LOC110379233, partial [Helicoverpa armigera]
MSTRG.1634	HzChr03	4562178	4563966	-0.519267	6.29211	2.89647	0.115268	0.290185	0.233228	0.00819372	0.929412	1
MSTRG.1633	HzChr03	4565991	4574885	1.53034	-0.149652	0.183926	0.674641	0.847082	0.607068	3.10829	0.100019	0.44604
MSTRG.1632	HzChr03	4577666	4613365	1.03757	-0.207707	0.402128	0.536365	0.751538	1.11791	11.7571	0.0041499	0.155053
MSTRG.1631	HzChr03	4668037	4671008	2.5077	0.293839	0.977159	0.339921	0.576337	0.524251	3.14942	0.098011	0.445864
MSTRG.1630	HzChr03	4689756	4690365	2.31552	3.21965	52.4549	4.77777e-06	0.000378429	0.529048	1.80295	0.201133	0.572092
MSTRG.1629	HzChr03	4739472	4744209	1.79657	0.314504	0.647929	0.434507	0.667699	1.11231	8.26066	0.0124013	0.224406
MSTRG.1627	HzChr03	4811164	4837866	5.01434	0.147922	0.16745	0.688734	0.854104	0.928743	6.54498	0.0230957	0.276298	XP_021194506.1	protein drumstick [Helicoverpa armigera]
MSTRG.1600	HzChr03	5134852	5516291	3.98897	0.934456	13.5762	0.0025176	0.0220397	-0.228075	0.82986	0.377998	0.747178	XP_021190131.1	long-chain-fatty-acid--CoA ligase 5 isoform X1 [Helicoverpa armigera]
MSTRG.1600	HzChr03	5134852	5516291	3.98897	0.934456	13.5762	0.0025176	0.0220397	-0.228075	0.82986	0.377998	0.747178	XP_021190133.1	long-chain-fatty-acid--CoA ligase 5 isoform X3 [Helicoverpa armigera]
MSTRG.1600	HzChr03	5134852	5516291	3.98897	0.934456	13.5762	0.0025176	0.0220397	-0.228075	0.82986	0.377998	0.747178	XP_021190138.1	#NAME?
MSTRG.1600	HzChr03	5134852	5516291	3.98897	0.934456	13.5762	0.0025176	0.0220397	-0.228075	0.82986	0.377998	0.747178	XP_021190140.1	#NAME?
MSTRG.1600	HzChr03	5134852	5516291	3.98897	0.934456	13.5762	0.0025176	0.0220397	-0.228075	0.82986	0.377998	0.747178	XP_021190143.1	#NAME?
MSTRG.1600	HzChr03	5134852	5516291	3.98897	0.934456	13.5762	0.0025176	0.0220397	-0.228075	0.82986	0.377998	0.747178	XP_021190145.1	#NAME?
MSTRG.1600	HzChr03	5134852	5516291	3.98897	0.934456	13.5762	0.0025176	0.0220397	-0.228075	0.82986	0.377998	0.747178	XP_021190146.1	#NAME?
MSTRG.1600	HzChr03	5134852	5516291	3.98897	0.934456	13.5762	0.0025176	0.0220397	-0.228075	0.82986	0.377998	0.747178	XP_021190158.1	cGMP-dependent protein kinase, isozyme 2 forms cD4/T1/T3A/T3B-like isoform X2 [Helicoverpa armigera]
MSTRG.1600	HzChr03	5134852	5516291	3.98897	0.934456	13.5762	0.0025176	0.0220397	-0.228075	0.82986	0.377998	0.747178	XP_021190159.1	cGMP-dependent protein kinase, isozyme 2 forms cD4/T1/T3A/T3B-like isoform X3 [Helicoverpa armigera]
MSTRG.1608	HzChr03	5215275	5216531	-0.976924	1.35086	1.71348	0.211918	0.429838	1.52368	2.07823	0.171725	0.538899
MSTRG.1607	HzChr03	5223195	5229741	0.0723677	7.81417	5.87027	0.0429883	0.153454	-0.982913	0.226291	0.647564	0.901386
MSTRG.1606	HzChr03	5237350	5237887	1.05553	-1.19918	2.98265	0.106699	0.276671	-1.31579	3.77706	0.0728624	0.40419
MSTRG.1605	HzChr03	5292834	5295577	-0.504228	-2.01306	2.41047	0.147243	0.338898	1.5691	0.962528	0.346477	0.721734	XP_021194900.1	uncharacterized protein LOC110379526, partial [Helicoverpa armigera]
MSTRG.1604	HzChr03	5330724	5331173	2.64524	1.60436	5.74899	0.031403	0.124546	0.603211	0.889018	0.362127	0.733924
MSTRG.1603	HzChr03	5407798	5410494	0.937317	2.92682	8.83923	0.0103046	0.0579856	0.966556	1.11214	0.309919	0.692538	XP_021201305.1	uncharacterized protein LOC110384368 [Helicoverpa armigera]
MSTRG.1602	HzChr03	5423425	5423680	3.06456	0.540724	0.440861	0.517762	0.736535	-0.107286	0.0173802	0.897038	0.994877
MSTRG.1588	HzChr03	5968760	5971843	7.50546	0.33766	2.44797	0.140363	0.32838	0.400499	3.44745	0.0848697	0.425096
STRG.1408	HzChr03	5974983	5975565	-1.20325	4.36458	2.1773	0.166556	0.366062	1.01794	0.184814	0.675109	0.914737	XP_021195808.1	arylphorin subunit beta-like [Helicoverpa armigera]
MSTRG.1583	HzChr03	6104303	6111556	7.0299	1.8562	6.19279	0.0264069	0.110619	-0.422839	0.342818	0.567758	0.864951	XP_021195829.1	endochitinase A-like [Helicoverpa armigera]
MSTRG.1582	HzChr03	6122223	6123082	7.07309	1.21849	1.5141	0.239291	0.466317	-0.489175	0.250358	0.62479	0.891624	XP_021195817.1	uncharacterized protein LOC110380227 [Helicoverpa armigera]
MSTRG.1581	HzChr03	6123567	6124282	6.20385	0.483392	0.676324	0.424983	0.657507	-1.00966	2.88121	0.11228	0.460524
MSTRG.1579	HzChr03	6142431	6146505	0.749444	0.0576099	0.0283125	0.868818	0.953341	0.469652	1.89942	0.190085	0.560141
MSTRG.1578	HzChr03	6146650	6148429	5.44914	-0.279245	3.1895	0.0961009	0.259055	0.0279203	0.0319002	0.860843	0.982381
MSTRG.1577	HzChr03	6148169	6149905	3.77547	-0.289209	2.50651	0.136024	0.32258	-0.568962	9.49014	0.00825848	0.194873
MSTRG.1575	HzChr03	6151664	6168966	11.5218	-0.0610575	0.106262	0.749332	0.888574	-0.240311	1.64427	0.220867	0.595442	XP_021195822.1	60S ribosomal protein L13a [Helicoverpa armigera]
MSTRG.1576	HzChr03	6166441	6168169	7.56169	0.0189744	0.0336896	0.857039	0.948057	-0.043144	0.174103	0.682911	0.917697
MSTRG.1574	HzChr03	6168686	6173336	4.26877	-0.0805928	0.242276	0.630307	0.817847	0.0128581	0.0061385	0.938676	1
MSTRG.1571	HzChr03	6177242	6178243	-0.646811	0.643332	0.192977	0.668484	0.843902	5.13202	5.98501	0.0313298	0.305846
MSTRG.1570	HzChr03	6178363	6178964	-1.48198	-5.63064	2.80909	0.120324	0.298621	1.51682	0.332515	0.575149	0.870233
MSTRG.1569	HzChr03	6179088	6179789	-0.99135	-7.72813	11.4595	0.0161685	0.0796301	0	0	1	1
MSTRG.1562	HzChr03	6183732	6272294	3.83158	-1.04045	6.79341	0.0210504	0.0943682	0.711462	3.21403	0.0951806	0.440091	XP_021195821.1	EF-hand domain-containing protein D2 homolog [Helicoverpa armigera]
MSTRG.1568	HzChr03	6196973	6198881	0.501173	0.0869887	0.0336615	0.857098	0.948057	0.348168	0.538846	0.475202	0.816046
MSTRG.1567	HzChr03	6199218	6200524	3.80552	-0.467977	4.07277	0.0634591	0.199213	-0.0921857	0.157356	0.697671	0.922961
MSTRG.1566	HzChr03	6200554	6212744	2.81708	0.749269	1.25331	0.282226	0.515652	-0.329241	0.230959	0.638421	0.896279	XP_021195810.1	2-hydroxyacyl-CoA lyase 1 isoform X1 [Helicoverpa armigera]
MSTRG.1565	HzChr03	6221267	6242442	-0.211638	1.3155	5.87618	0.0297033	0.120282	-0.0713031	0.0189097	0.892612	0.993937
MSTRG.1563	HzChr03	6263154	6263491	-0.112225	0.711183	0.273716	0.609235	0.80337	2.35709	2.60602	0.12932	0.487423
MSTRG.1561	HzChr03	6278135	6310814	0.893873	0.471257	0.971495	0.341278	0.577558	0.415907	0.805803	0.384761	0.753084	XP_021199341.1	uncharacterized transporter slc-17 2-like [Helicoverpa armigera]
MSTRG.1558	HzChr03	6454256	6530701	3.48433	0.515695	5.60667	0.0330646	0.128849	-0.0881182	0.162818	0.692759	0.921358	XP_021195005.1	LOW QUALITY PROTEIN: enoyl-[acyl-carrier-protein] reductase, mitochondrial-like [Helicoverpa armigera]
MSTRG.1558	HzChr03	6454256	6530701	3.48433	0.515695	5.60667	0.0330646	0.128849	-0.0881182	0.162818	0.692759	0.921358	XP_021195011.1	FAS-associated factor 2 isoform X2 [Helicoverpa armigera]
MSTRG.1559	HzChr03	6464136	6472960	1.86697	2.36925	33.8688	4.71482e-05	0.00158148	-0.0444383	0.0130937	0.910547	0.999343	XP_021195000.1	uncharacterized protein LOC110379598 [Helicoverpa armigera]
MSTRG.1556	HzChr03	6484320	6547417	3.58172	-0.301473	1.87302	0.193003	0.403724	-0.394463	3.17207	0.096926	0.443418	XP_021195006.1	cytochrome b5 reductase 4 isoform X1 [Helicoverpa armigera]
MSTRG.1556	HzChr03	6484320	6547417	3.58172	-0.301473	1.87302	0.193003	0.403724	-0.394463	3.17207	0.096926	0.443418	XP_021195007.1	cytochrome b5 reductase 4 isoform X2 [Helicoverpa armigera]
MSTRG.1556	HzChr03	6484320	6547417	3.58172	-0.301473	1.87302	0.193003	0.403724	-0.394463	3.17207	0.096926	0.443418	XP_021195008.1	cytochrome b5 reductase 4 isoform X3 [Helicoverpa armigera]
MSTRG.1557	HzChr03	6517462	6545710	6.02323	-1.52892	4.5317	0.0519875	0.174345	-0.404969	0.327499	0.576436	0.870631	XP_021195009.1	fatty-acid amide hydrolase 2-A [Helicoverpa armigera]
MSTRG.1555	HzChr03	6548898	6551810	10.176	0.241851	1.5996	0.226906	0.450167	-0.484308	6.39073	0.0243333	0.280919	XP_021195020.1	cytochrome c-2 [Helicoverpa armigera]
MSTRG.1554	HzChr03	6570576	6574625	5.98653	-7.64499	34.315	8.70031e-05	0.00237403	-0.739589	0.592112	0.456915	0.803078
STRG.1370	HzChr03	6589720	6590206	-1.323	3.11294	4.40899	0.05464	0.180463	-0.0635654	0.00215918	0.963604	1	XP_021199702.1	uncharacterized protein LOC110383259, partial [Helicoverpa armigera]
MSTRG.1537	HzChr03	6721650	6871270	11.2969	0.176639	0.73872	0.404758	0.63926	-0.179973	0.766821	0.396192	0.761067	XP_021199836.1	60S ribosomal protein L11 [Helicoverpa armigera]
MSTRG.1551	HzChr03	6742582	6744551	7.14553	-0.0418347	0.0643008	0.803563	0.920788	-0.0183762	0.0123958	0.912953	0.999408
MSTRG.1550	HzChr03	6744859	6745457	7.1076	-0.370341	2.61865	0.12836	0.310262	-0.498249	4.72336	0.0477801	0.3552
MSTRG.1549	HzChr03	6745274	6747715	1.9767	0.442251	2.0141	0.17804	0.382688	-0.0417539	0.0179015	0.895496	0.994456	XP_021199156.1	tRNA-splicing endonuclease subunit Sen2 [Helicoverpa armigera]
MSTRG.1548	HzChr03	6764748	6770686	2.27927	0.383347	6.08701	0.0273507	0.113327	0.336143	4.6912	0.0483413	0.356968
MSTRG.1547	HzChr03	6770647	6787864	-0.885073	-0.0926467	0.0298598	0.865318	0.951444	1.03918	3.46389	0.0841638	0.424585	XP_021199821.1	zinc finger protein 2 homolog isoform X2 [Helicoverpa armigera]
MSTRG.1547	HzChr03	6770647	6787864	-0.885073	-0.0926467	0.0298598	0.865318	0.951444	1.03918	3.46389	0.0841638	0.424585	XP_021199826.1	zinc finger protein 2-like isoform X7 [Helicoverpa armigera]
MSTRG.1547	HzChr03	6770647	6787864	-0.885073	-0.0926467	0.0298598	0.865318	0.951444	1.03918	3.46389	0.0841638	0.424585	XP_021199830.1	zinc finger protein 2 homolog isoform X11 [Helicoverpa armigera]
MSTRG.1547	HzChr03	6770647	6787864	-0.885073	-0.0926467	0.0298598	0.865318	0.951444	1.03918	3.46389	0.0841638	0.424585	XP_021199832.1	zinc finger protein 2 homolog isoform X13 [Helicoverpa armigera]
MSTRG.1547	HzChr03	6770647	6787864	-0.885073	-0.0926467	0.0298598	0.865318	0.951444	1.03918	3.46389	0.0841638	0.424585	XP_021199833.1	zinc finger protein 2 homolog isoform X14 [Helicoverpa armigera]
MSTRG.1547	HzChr03	6770647	6787864	-0.885073	-0.0926467	0.0298598	0.865318	0.951444	1.03918	3.46389	0.0841638	0.424585	XP_021199834.1	zinc finger protein 2 homolog isoform X15 [Helicoverpa armigera]
MSTRG.1546	HzChr03	6793554	6797359	-0.272107	0.323548	0.543341	0.473401	0.700405	-0.0208414	0.00214456	0.963727	1
MSTRG.1545	HzChr03	6798506	6802299	4.0832	-0.464604	7.34178	0.0171125	0.0824983	-0.593769	11.8497	0.00404092	0.153189
MSTRG.1543	HzChr03	6803163	6815840	1.34812	0.359275	1.2813	0.276948	0.509981	-0.0578899	0.0331084	0.858263	0.981341	XP_021189136.1	dyslexia-associated protein KIAA0319 [Helicoverpa armigera]
MSTRG.1539	HzChr03	6820044	6838735	1.50394	-6.96142	11.2497	0.00595822	0.0394143	1.47957	1.54182	0.238754	0.617845	XP_021189168.1	cytochrome P450 4V2-like [Helicoverpa armigera]
MSTRG.1541	HzChr03	6832791	6833369	2.01305	1.22691	0.860305	0.369758	0.60598	-0.165885	0.0115549	0.915961	1
MSTRG.1540	HzChr03	6833599	6834588	1.0027	0.804942	0.518149	0.483771	0.707991	0.708734	0.317357	0.582333	0.873432
MSTRG.1533	HzChr03	6851269	6905260	7.92906	0.302733	1.30988	0.27207	0.504417	0.339593	1.64778	0.220605	0.595242
MSTRG.1536	HzChr03	6863295	6875114	1.2889	-0.344408	2.8753	0.112386	0.285927	-0.213448	1.07564	0.317511	0.700347	XP_021189124.1	uncharacterized protein LOC110375368 isoform X2 [Helicoverpa armigera]
MSTRG.1535	HzChr03	6885044	6887613	3.2084	-0.0532279	0.0509489	0.82473	0.932684	0.110018	0.215876	0.649448	0.902214
MSTRG.1531	HzChr03	6976716	6981864	3.4946	-0.864674	7.73472	0.0149675	0.0754192	-0.318239	1.04678	0.323988	0.705721
MSTRG.1522	HzChr03	6991643	7112430	3.66011	0.5596	4.25877	0.058459	0.188116	-0.0514425	0.0363126	0.851657	0.978777	XP_021189133.1	protein split ends-like [Helicoverpa armigera]
MSTRG.1529	HzChr03	7029726	7032010	-0.0809035	2.56736	15.1009	0.00168896	0.0167796	-0.33605	0.306748	0.588547	0.875715
MSTRG.1508	HzChr03	7438878	7440237	2.00775	2.46256	9.55032	0.00818513	0.0492666	0.227851	0.105536	0.750208	0.943106
MSTRG.1507	HzChr03	7503453	7562564	4.1693	-0.219762	0.573866	0.461591	0.691293	-1.43844	23.3925	0.000282329	0.0687442	XP_021189129.1	PR domain zinc finger protein 16-like [Helicoverpa armigera]
MSTRG.1502	HzChr03	7619093	7719279	3.81691	0.0877447	0.24986	0.625051	0.814287	0.487658	7.7249	0.0149322	0.239303	XP_021189115.1	zinc finger protein 431-like [Helicoverpa armigera]
MSTRG.1502	HzChr03	7619093	7719279	3.81691	0.0877447	0.24986	0.625051	0.814287	0.487658	7.7249	0.0149322	0.239303	XP_021189139.1	ATP-dependent DNA helicase PIF1 [Helicoverpa armigera]
MSTRG.1502	HzChr03	7619093	7719279	3.81691	0.0877447	0.24986	0.625051	0.814287	0.487658	7.7249	0.0149322	0.239303	XP_021189151.1	protein gustavus isoform X1 [Helicoverpa armigera]
MSTRG.1502	HzChr03	7619093	7719279	3.81691	0.0877447	0.24986	0.625051	0.814287	0.487658	7.7249	0.0149322	0.239303	XP_021189152.1	protein gustavus isoform X2 [Helicoverpa armigera]
MSTRG.1506	HzChr03	7668038	7679873	0.0290946	0.117185	0.119012	0.735311	0.880837	1.01588	8.75439	0.0105002	0.213377	XP_021189147.1	uncharacterized protein LOC110375391 isoform X1 [Helicoverpa armigera]
MSTRG.1506	HzChr03	7668038	7679873	0.0290946	0.117185	0.119012	0.735311	0.880837	1.01588	8.75439	0.0105002	0.213377	XP_021189148.1	uncharacterized protein LOC110375391 isoform X2 [Helicoverpa armigera]
MSTRG.1506	HzChr03	7668038	7679873	0.0290946	0.117185	0.119012	0.735311	0.880837	1.01588	8.75439	0.0105002	0.213377	XP_021189149.1	uncharacterized protein LOC110375391 isoform X3 [Helicoverpa armigera]
MSTRG.1504	HzChr03	7700766	7703948	0.998589	-0.099585	0.0580392	0.813165	0.9258	0.405355	0.984479	0.338179	0.7168	XP_021189117.1	twist-related protein-like [Helicoverpa armigera]
MSTRG.1501	HzChr03	7717792	7731727	2.22985	0.192047	0.792397	0.388635	0.624665	-0.380971	3.12522	0.0991867	0.445997	XP_021189126.1	protein brunelleschi [Helicoverpa armigera]
MSTRG.1497	HzChr03	7764459	7804904	3.53646	1.48108	3.94421	0.0674849	0.206895	0.196105	0.0779279	0.784309	0.956883	XP_021198426.1	estradiol 17-beta-dehydrogenase 11 [Helicoverpa armigera]
MSTRG.1496	HzChr03	7804881	7821181	2.82126	-0.205003	0.581355	0.45862	0.688647	-0.729167	6.99858	0.0193852	0.258836	XP_021198442.1	integrin beta-nu [Helicoverpa armigera]
MSTRG.1495	HzChr03	7827192	7836816	6.31467	-0.471436	8.58863	0.0110981	0.0608657	-0.397349	6.09375	0.0272791	0.289659	XP_021198439.1	dihydrolipoyllysine-residue acetyltransferase component of pyruvate dehydrogenase complex, mitochondrial [Helicoverpa armigera]
MSTRG.1494	HzChr03	7837886	7839154	12.3051	0.0266787	0.0144157	0.906162	0.972758	-0.521368	5.47585	0.0348557	0.317484
MSTRG.1493	HzChr03	7846558	7853878	0.32453	-0.689708	0.328968	0.577167	0.782819	-4.88186	6.08347	0.0302127	0.301082	XP_021198441.1	solute carrier family 41 member 1-like [Helicoverpa armigera]
MSTRG.1492	HzChr03	7853946	7881696	2.60478	0.34294	0.669676	0.427214	0.660171	-0.383495	0.821406	0.380484	0.749915	XP_021198436.1	polypeptide N-acetylgalactosaminyltransferase 5 isoform X1 [Helicoverpa armigera]
MSTRG.1492	HzChr03	7853946	7881696	2.60478	0.34294	0.669676	0.427214	0.660171	-0.383495	0.821406	0.380484	0.749915	XP_021198437.1	polypeptide N-acetylgalactosaminyltransferase 5 isoform X2 [Helicoverpa armigera]
MSTRG.1492	HzChr03	7853946	7881696	2.60478	0.34294	0.669676	0.427214	0.660171	-0.383495	0.821406	0.380484	0.749915	XP_021198438.1	polypeptide N-acetylgalactosaminyltransferase 5 isoform X3 [Helicoverpa armigera]
MSTRG.1491	HzChr03	7880929	7902828	3.45598	-0.442068	8.35497	0.0120092	0.0647687	0.0340716	0.0501538	0.826078	0.970982	XP_021198433.1	mitogen-activated protein kinase kinase kinase 7 [Helicoverpa armigera]
MSTRG.1490	HzChr03	7907140	7911256	1.47854	-0.604661	6.20998	0.0260792	0.109678	-0.637651	6.65159	0.0220483	0.272225
MSTRG.1489	HzChr03	7913101	7916828	4.56919	0.301445	2.02282	0.177165	0.381573	-0.172529	0.668557	0.42745	0.783307
STRG.1300	HzChr03	8025363	8025818	2.31066	-0.382529	0.0358019	0.852708	0.945711	-2.02199	0.907129	0.357433	0.729626
STRG.1299	HzChr03	8205650	8208268	-0.586498	-2.93061	2.46776	0.139079	0.326375	1.1924	0.440848	0.517767	0.840184	XP_021192898.1	runt-related transcription factor 3-like isoform X2 [Helicoverpa armigera]
MSTRG.1483	HzChr03	8209823	8214946	2.86777	-0.174385	0.605925	0.449471	0.68077	0.377537	2.83125	0.114929	0.464734	XP_021192878.1	pre-mRNA-splicing regulator female-lethal(2)D [Helicoverpa armigera]
STRG.1297	HzChr03	8219918	8220900	-0.772667	0.249287	0.0317509	0.861188	0.949622	0.563418	0.154019	0.700773	0.923212	XP_021192877.1	carboxypeptidase B-like [Helicoverpa armigera]
MSTRG.1482	HzChr03	8229907	8234989	0.815297	-0.0524391	0.000523541	0.982076	1	4.23067	4.43371	0.0542521	0.371662	XP_021192893.1	carboxypeptidase B-like [Helicoverpa armigera]
MSTRG.1481	HzChr03	8236098	8245801	1.86644	-1.04137	20.2405	0.00051811	0.0075251	0.270868	1.39507	0.257511	0.635808
MSTRG.1480	HzChr03	8246299	8249209	3.31799	-0.327611	1.46027	0.2472	0.475881	0.504812	3.51168	0.0822802	0.42248
MSTRG.1479	HzChr03	8249397	8251352	-0.578385	0.801123	3.03107	0.103926	0.272434	-0.838289	3.20951	0.0951639	0.440091
MSTRG.1478	HzChr03	8251465	8252102	-1.03857	-1.98991	1.45756	0.251214	0.481224	5.14417	5.62759	0.0357927	0.320037
MSTRG.1477	HzChr03	8255710	8256926	3.89767	0.064509	0.0842575	0.775926	0.905398	-0.235444	1.11974	0.30815	0.691085	XP_021192874.1	uncharacterized protein LOC110378094 [Helicoverpa armigera]
MSTRG.1476	HzChr03	8256911	8270420	0.64153	0.237637	0.682581	0.422757	0.655553	-0.0973344	0.111468	0.743499	0.940794	XP_021192886.1	probable ribonuclease ZC3H12B [Helicoverpa armigera]
MSTRG.1475	HzChr03	8278689	8281443	5.26067	0.264279	1.5844	0.229023	0.452565	-0.0984583	0.220131	0.646272	0.900519
MSTRG.1474	HzChr03	8281115	8282413	5.87425	-0.279558	6.12532	0.0269469	0.112084	-0.105083	0.866129	0.368028	0.738592
MSTRG.1471	HzChr03	8282698	8321258	4.24986	-0.277164	0.371569	0.552159	0.764474	-0.239967	0.278239	0.606322	0.88167	XP_021192875.1	probable ATP-dependent RNA helicase DDX46 [Helicoverpa armigera]
MSTRG.1473	HzChr03	8304648	8305837	-0.41347	7.49623	50.5153	1.3549e-05	0.00071699	-0.263074	0.135669	0.71915	0.931547
MSTRG.1472	HzChr03	8315472	8316515	5.01229	0.123922	0.607712	0.448817	0.68077	-0.504814	9.96796	0.00709918	0.185142
MSTRG.1470	HzChr03	8340537	8341307	1.73831	-0.224551	0.287388	0.600443	0.79819	-0.424256	1.04113	0.325133	0.706388
MSTRG.1468	HzChr03	8358608	8359431	0.486711	0.421026	0.538606	0.475299	0.70185	0.0890932	0.0240882	0.878908	0.990344
MSTRG.1466	HzChr03	8414049	8415766	0.995885	0.390306	0.722296	0.409898	0.643692	-0.117133	0.0635405	0.804701	0.964083
MSTRG.1465	HzChr03	8457131	8458386	3.45082	-0.932288	13.7913	0.00236744	0.02111	0.0333351	0.0179366	0.895394	0.994456
MSTRG.1461	HzChr03	8483853	8571860	1.41268	0.411584	0.572681	0.462027	0.691794	0.286484	0.279819	0.605295	0.881129	XP_021199410.1	uncharacterized protein LOC110383028 [Helicoverpa armigera]
MSTRG.1464	HzChr03	8487535	8497295	3.70993	0.271405	1.2184	0.288555	0.522707	-0.624665	6.33363	0.0248696	0.282303
MSTRG.1460	HzChr03	8580008	8580924	-0.167897	1.04623	0.696361	0.418369	0.651628	1.85899	2.10107	0.169772	0.536764
MSTRG.1458	HzChr03	8581810	8589249	0.980966	3.62636	8.91173	0.0100615	0.0570888	1.56998	1.85735	0.194983	0.565488
MSTRG.1456	HzChr03	8654648	8707184	1.41274	-1.7717	7.65869	0.0154039	0.0770105	0.589185	0.924165	0.353098	0.72697	XP_021189726.1	arginine/serine-rich protein PNISR isoform X1 [Helicoverpa armigera]
MSTRG.1457	HzChr03	8702895	8703813	-0.398516	1.16747	1.11544	0.312224	0.548507	0.392537	0.121831	0.733259	0.936344
MSTRG.1455	HzChr03	8706315	8710731	7.24419	-0.27567	4.26355	0.0582637	0.187581	-0.191879	2.06358	0.173143	0.539669	XP_021189729.1	NADH dehydrogenase [ubiquinone] 1 beta subcomplex subunit 5, mitochondrial [Helicoverpa armigera]
MSTRG.1451	HzChr03	8745534	8776802	1.36809	0.402655	0.700456	0.416927	0.65032	0.156125	0.106817	0.748715	0.94249	XP_021189703.1	reversion-inducing cysteine-rich protein with Kazal motifs [Helicoverpa armigera]
MSTRG.1452	HzChr03	8770470	8773431	0.493622	3.74861	24.4129	0.000229056	0.00439307	-1.61104	5.5822	0.0334533	0.312255
MSTRG.1449	HzChr03	8786099	8800492	5.95912	-0.254417	3.51667	0.0820772	0.234545	-0.499711	13.4861	0.00256777	0.128817	XP_021189758.1	NADH-ubiquinone oxidoreductase 75 kDa subunit, mitochondrial [Helicoverpa armigera]
MSTRG.1447	HzChr03	8801575	8805573	3.53332	0.220341	0.273009	0.609693	0.803647	-0.162342	0.147698	0.706663	0.92539	XP_021189761.1	erlin-2-like [Helicoverpa armigera]
MSTRG.1446	HzChr03	8806173	8809844	-0.380462	0.368221	0.0407102	0.843073	0.940517	0.569585	0.0975835	0.759468	0.945597	XP_021189743.1	protein msta-like [Helicoverpa armigera]
MSTRG.1444	HzChr03	8810016	8825730	-0.0818232	0.184715	0.167879	0.688294	0.853914	1.81464	14.3856	0.00202676	0.124994	XP_021189741.1	protein lin-54 homolog isoform X2 [Helicoverpa armigera]
MSTRG.1443	HzChr03	8827037	8838027	5.16628	-0.0962684	0.218	0.647856	0.829002	-0.0206136	0.00997516	0.92188	1	XP_021189754.1	COP9 signalosome complex subunit 4 isoform X2 [Helicoverpa armigera]
MSTRG.1442	HzChr03	8838619	8841904	9.5863	-0.293815	8.17632	0.0127646	0.067825	-0.223565	4.73632	0.0474159	0.353876
MSTRG.1440	HzChr03	8845359	8854325	-1.09052	3.91423	2.06253	0.177252	0.381612	-0.20447	0.00883157	0.926724	1	XP_021189705.1	protein msta [Helicoverpa armigera]
MSTRG.1439	HzChr03	8854316	8856987	6.94007	0.197607	1.65216	0.219823	0.440836	-0.202423	1.73464	0.209276	0.580719
MSTRG.1437	HzChr03	8857114	8863888	3.43189	0.886777	11.0071	0.00517303	0.0359231	-0.0659401	0.062063	0.806937	0.964412
MSTRG.1438	HzChr03	8857205	8862119	6.78515	0.5338	13.8569	0.00232676	0.0208745	-0.01213	0.00720005	0.933597	1	XP_021189709.1	uncharacterized protein LOC110375786 [Helicoverpa armigera]
MSTRG.1431	HzChr03	8866518	8892765	1.80773	-0.208623	0.0108474	0.918564	0.978247	0.375681	0.0345655	0.855242	0.979685	XP_021189704.1	ubiquitin conjugation factor E4 B [Helicoverpa armigera]
MSTRG.1435	HzChr03	8883381	8884336	-0.888585	0.367898	0.203637	0.658813	0.837095	0.298833	0.138366	0.715562	0.929599
MSTRG.1433	HzChr03	8887913	8888861	-0.890917	-0.00535546	6.25638e-05	0.993802	1	0.630856	0.854254	0.371235	0.741041
MSTRG.1432	HzChr03	8889082	8890151	-0.866103	0.284449	0.292796	0.597064	0.796392	0.770187	2.12219	0.167559	0.535098
MSTRG.1429	HzChr03	8894850	8896884	4.26669	0.686917	4.9533	0.0434339	0.154491	-0.396426	1.65926	0.219103	0.59329
MSTRG.1428	HzChr03	8897714	8906206	1.41982	1.31317	13.4035	0.00262529	0.0226978	-0.125517	0.132366	0.721506	0.931547	XP_021189763.1	serine/threonine-protein kinase mTOR isoform X1 [Helicoverpa armigera]
MSTRG.1426	HzChr03	8909739	8910206	-1.0017	0.523038	0.144005	0.711108	0.866741	-2.59198	2.98613	0.110172	0.458071
MSTRG.1425	HzChr03	8910797	8918146	1.7211	-0.223378	0.762475	0.397498	0.632888	0.409455	2.55796	0.132382	0.490513	XP_021189712.1	actin-related protein 44230 complex subunit 2 isoform X3 [Helicoverpa armigera]
MSTRG.1424	HzChr03	8917654	8919933	4.75228	0.282595	0.607063	0.449188	0.68077	-0.320466	0.779723	0.392506	0.759167	XP_021189714.1	uncharacterized protein LOC110375788 [Helicoverpa armigera]
MSTRG.1407	HzChr03	9214221	9214599	0.760995	0.729595	0.206616	0.656575	0.835705	-0.12578	0.00639133	0.93744	1
MSTRG.1405	HzChr03	9299100	9299334	2.2817	8.8887	10.5712	0.0071877	0.0450186	0.311184	0.0421928	0.840796	0.975108
MSTRG.1404	HzChr03	9306942	9370118	1.36319	1.4411	0.406243	0.538701	0.753725	2.16316	0.886707	0.369333	0.739521
MSTRG.1402	HzChr03	9388448	9393422	-0.279533	0.202698	0.0793931	0.782304	0.908966	0.798753	1.2987	0.273851	0.652708	XP_021189756.1	protein msta [Helicoverpa armigera]
MSTRG.1395	HzChr03	9657138	9657380	1.79786	-0.129746	0.0129575	0.911028	0.975027	0.0362475	0.00101317	0.975068	1
MSTRG.1391	HzChr03	9705533	9715019	5.15711	-1.30419	5.75654	0.0313091	0.124402	-0.242058	0.204882	0.657917	0.905801
MSTRG.1389	HzChr03	9762331	9764853	-0.509726	-0.631984	1.86161	0.194282	0.405549	0.341534	0.53636	0.476203	0.816578
MSTRG.1387	HzChr03	9777628	9782860	0.500312	-0.19186	0.122236	0.731901	0.878646	-0.70681	1.69067	0.214815	0.587942	XP_021186033.1	uncharacterized protein LOC110373176 [Helicoverpa armigera]
MSTRG.1385	HzChr03	9783125	9787918	5.46367	-0.0639091	0.327708	0.576222	0.781925	0.0207712	0.0345849	0.855175	0.979685
MSTRG.1377	HzChr03	9869786	9995960	7.57171	0.979502	4.89656	0.0444824	0.156886	0.287775	0.429606	0.523072	0.842438	XP_021186066.1	thrombin inhibitor rhodniin-like [Helicoverpa armigera]
MSTRG.1377	HzChr03	9869786	9995960	7.57171	0.979502	4.89656	0.0444824	0.156886	0.287775	0.429606	0.523072	0.842438	XP_021186080.1	glyoxylate reductase/hydroxypyruvate reductase-like [Helicoverpa armigera]
MSTRG.1377	HzChr03	9869786	9995960	7.57171	0.979502	4.89656	0.0444824	0.156886	0.287775	0.429606	0.523072	0.842438	XP_021186091.1	uncharacterized protein LOC110373219 isoform X1 [Helicoverpa armigera]
MSTRG.1377	HzChr03	9869786	9995960	7.57171	0.979502	4.89656	0.0444824	0.156886	0.287775	0.429606	0.523072	0.842438	XP_021186092.1	uncharacterized protein LOC110373219 isoform X2 [Helicoverpa armigera]
MSTRG.1377	HzChr03	9869786	9995960	7.57171	0.979502	4.89656	0.0444824	0.156886	0.287775	0.429606	0.523072	0.842438	XP_021186117.1	mitochondrial carnitine/acylcarnitine carrier protein [Helicoverpa armigera]
MSTRG.1377	HzChr03	9869786	9995960	7.57171	0.979502	4.89656	0.0444824	0.156886	0.287775	0.429606	0.523072	0.842438	XP_021186121.1	chloride intracellular channel exc-4 isoform X1 [Helicoverpa armigera]
MSTRG.1377	HzChr03	9869786	9995960	7.57171	0.979502	4.89656	0.0444824	0.156886	0.287775	0.429606	0.523072	0.842438	XP_021186122.1	chloride intracellular channel exc-4 isoform X2 [Helicoverpa armigera]
MSTRG.1377	HzChr03	9869786	9995960	7.57171	0.979502	4.89656	0.0444824	0.156886	0.287775	0.429606	0.523072	0.842438	XP_021186133.1	glyoxylate reductase/hydroxypyruvate reductase-like [Helicoverpa armigera]
MSTRG.1383	HzChr03	9886089	9888269	4.3976	0.104969	0.351604	0.562801	0.771812	0.106748	0.363152	0.556537	0.858579	XP_021186131.1	ragulator complex protein LAMTOR3 homolog [Helicoverpa armigera]
MSTRG.1381	HzChr03	9899633	9902748	1.638	-1.71063	21.1735	0.000426774	0.00657922	-0.187238	0.261673	0.617062	0.887629	XP_021186094.1	pre-mRNA-splicing factor Syf2 [Helicoverpa armigera]
MSTRG.1380	HzChr03	9956351	9959050	0.281307	2.40991	1.79698	0.201955	0.416602	0.583574	0.109439	0.745805	0.941683
MSTRG.1378	HzChr03	9984138	9993741	0.166944	-1.65112	1.51679	0.238895	0.465965	2.12261	2.34276	0.148698	0.509359	XP_021186086.1	SWI/SNF-related matrix-associated actin-dependent regulator of chromatin subfamily A-like protein 1 [Helicoverpa armigera]
MSTRG.1376	HzChr03	10000638	9999859	2.68739	0.0183593	0.00195278	0.965392	0.9947	0.641719	2.41186	0.143282	0.503566
MSTRG.1374	HzChr03	10005879	10052894	0.586227	-0.517641	0.162721	0.692909	0.85623	-1.2432	0.701513	0.416694	0.776678	XP_021186110.1	Niemann-Pick C1 protein isoform X1 [Helicoverpa armigera]
MSTRG.1374	HzChr03	10005879	10052894	0.586227	-0.517641	0.162721	0.692909	0.85623	-1.2432	0.701513	0.416694	0.776678	XP_021186112.1	Niemann-Pick C1 protein isoform X3 [Helicoverpa armigera]
MSTRG.1374	HzChr03	10005879	10052894	0.586227	-0.517641	0.162721	0.692909	0.85623	-1.2432	0.701513	0.416694	0.776678	XP_021186113.1	Niemann-Pick C1 protein isoform X4 [Helicoverpa armigera]
MSTRG.1374	HzChr03	10005879	10052894	0.586227	-0.517641	0.162721	0.692909	0.85623	-1.2432	0.701513	0.416694	0.776678	XP_021186115.1	Niemann-Pick C1 protein isoform X6 [Helicoverpa armigera]
MSTRG.1373	HzChr03	10053166	10057855	0.441813	1.36538	1.04694	0.323998	0.560534	-0.358676	0.0755861	0.787486	0.957639	XP_021186095.1	thioredoxin domain-containing protein 15 [Helicoverpa armigera]
MSTRG.1372	HzChr03	10059828	10088069	4.00048	-0.488333	5.23515	0.0384578	0.142785	-0.0292723	0.0188272	0.892845	0.993937	XP_021186096.1	glyoxylate reductase/hydroxypyruvate reductase [Helicoverpa armigera]
MSTRG.1369	HzChr03	10062963	10119335	1.46684	1.37675	1.29534	0.274642	0.508078	1.07752	0.816993	0.38173	0.750881	XP_021186059.1	SH2 domain-containing protein 4A-like [Helicoverpa armigera]
MSTRG.1370	HzChr03	10110670	10111737	-1.3022	-0.149592	0.00281959	0.959012	0.993842	0	0	1	1
MSTRG.1367	HzChr03	10149026	10159107	0.554134	0.239236	0.285266	0.601771	0.798726	0.939952	4.45922	0.0534511	0.369249
MSTRG.1364	HzChr03	10170212	10171097	2.20136	0.485384	1.22239	0.28793	0.522256	-0.0676931	0.0246266	0.87759	0.98956
MSTRG.1363	HzChr03	10172674	10177779	3.91329	0.334566	0.127012	0.726996	0.876129	-0.827231	0.77392	0.394225	0.760246
MSTRG.1362	HzChr03	10178882	10187211	4.64013	-1.38571	14.1846	0.00217126	0.0199973	0.524603	2.08485	0.171316	0.53872	XP_021186079.1	glutathione S-transferase 2-like [Helicoverpa armigera]
MSTRG.1360	HzChr03	10197805	10201286	7.3386	0.452361	0.520214	0.482917	0.707528	-0.904333	2.04733	0.174958	0.541603
MSTRG.1359	HzChr03	10201742	10206314	6.80878	-0.520452	2.78396	0.117968	0.294765	-0.425586	1.85951	0.19474	0.565465
MSTRG.1358	HzChr03	10206691	10222474	8.88734	-0.395538	2.65243	0.126114	0.306537	-0.389536	2.57167	0.131543	0.489273	XP_021186026.1	glutathione S-transferase 2-like [Helicoverpa armigera]
MSTRG.1357	HzChr03	10223491	10225313	5.25325	1.50141	38.7477	2.43023e-05	0.00102632	-0.408996	2.98214	0.106622	0.453954
MSTRG.1356	HzChr03	10225485	10227770	4.0276	-0.504371	4.50742	0.0523492	0.175103	0.212148	0.800296	0.386354	0.754606	XP_021186038.1	non-structural maintenance of chromosomes element 3 homolog [Helicoverpa armigera]
MSTRG.1355	HzChr03	10227961	10246694	2.19184	0.467723	2.24547	0.156535	0.351434	0.106405	0.116857	0.73762	0.938459	XP_021186062.1	mitochondrial 2-oxoglutarate/malate carrier protein-like [Helicoverpa armigera]
STRG.1172	HzChr03	10260802	10262733	0.245099	-0.817735	0.323124	0.580523	0.785014	-0.631051	0.191101	0.669991	0.911674
MSTRG.1354	HzChr03	10268137	10276323	3.45755	-0.18167	0.505952	0.488749	0.712461	0.487004	3.62218	0.0780887	0.413401
MSTRG.1353	HzChr03	10307486	10309224	1.27009	4.23969	23.3477	0.000285301	0.0051054	-0.760927	1.14632	0.30288	0.685534
MSTRG.1350	HzChr03	10334847	10343072	7.47103	-0.398044	2.11792	0.168185	0.368518	-1.2141	19.1639	0.000668181	0.0923459	XP_021186028.1	non-specific lipid-transfer protein [Helicoverpa armigera]
MSTRG.1349	HzChr03	10346477	10359595	3.92166	-0.0879974	0.335748	0.571635	0.778162	0.279688	3.39813	0.0868539	0.427348	XP_021186030.1	myeloid leukemia factor isoform X1 [Helicoverpa armigera]
MSTRG.1348	HzChr03	10359308	10382290	3.50295	0.65704	10.7488	0.00558551	0.0380052	-0.423667	4.45004	0.053666	0.369702	XP_021186045.1	uncharacterized protein LOC110373187, partial [Helicoverpa armigera]
MSTRG.1347	HzChr03	10387092	10393385	5.77149	0.127635	0.232434	0.637361	0.821851	-0.273062	1.06205	0.320657	0.703847
MSTRG.1346	HzChr03	10419947	10427848	5.36664	-0.219237	0.499816	0.49147	0.71466	-0.0113201	0.00133883	0.971341	1
MSTRG.1345	HzChr03	10438397	10438851	2.55188	-2.97915	47.0336	8.83594e-06	0.00055076	-0.193143	0.230128	0.639006	0.896499
MSTRG.1343	HzChr03	10449600	10451174	-1.64578	0	0	1	1	-6.15668	3.49941	0.0999666	0.445997
MSTRG.1342	HzChr03	10451383	10464740	1.55104	0.766356	0.749296	0.401652	0.63649	0.514263	0.332665	0.573479	0.868804	XP_021186102.1	ATPase family AAA domain-containing protein 1-like isoform X2 [Helicoverpa armigera]
MSTRG.1341	HzChr03	10465118	10472647	4.81156	0.0918613	0.0965884	0.760656	0.895478	-0.181907	0.378678	0.54843	0.855438
MSTRG.1340	HzChr03	10483044	10485261	-0.568446	5.92733	17.4629	0.000958139	0.0113239	0.412101	0.153597	0.701115	0.9234
MSTRG.1337	HzChr03	10526195	10565300	2.08318	2.81701	54.0823	3.92037e-06	0.000330049	0.0598804	0.0288159	0.867669	0.985196	XP_021186130.1	methyltransferase-like protein 14 homolog [Helicoverpa armigera]
MSTRG.1332	HzChr03	10551171	10700050	1.48397	-0.584781	4.72232	0.0477007	0.163738	0.205356	0.578757	0.459605	0.804806	XP_021186036.1	uncharacterized protein LOC110373178 [Helicoverpa armigera]
MSTRG.1335	HzChr03	10658338	10676490	-0.110549	0.378206	0.0246622	0.877899	0.95804	-7.24188	3.82122	0.0750143	0.408016	XP_021186077.1	uncharacterized protein LOC110373209 [Helicoverpa armigera]
MSTRG.1328	HzChr03	10801028	10804335	4.87268	-0.152257	0.148734	0.705689	0.86454	-0.827117	4.20732	0.0599476	0.383434
MSTRG.1321	HzChr03	10810515	11033061	1.82911	0.247195	0.786081	0.390481	0.626253	0.827388	9.08893	0.00940342	0.204931
MSTRG.1324	HzChr03	10908479	10909082	0.970308	3.23348	17.4787	0.000973084	0.0114483	0.311087	0.206024	0.657032	0.9052
MSTRG.1319	HzChr03	11047667	11129068	2.48533	-0.31581	0.277263	0.606948	0.802064	0.680327	1.31375	0.271405	0.649459	XP_021190974.1	potassium voltage-gated channel protein Shaw-like isoform X3 [Helicoverpa armigera]
MSTRG.1320	HzChr03	11067629	11073959	-1.25172	0.704432	0.501241	0.490744	0.71412	1.01086	1.02997	0.327633	0.708196	XP_021196015.1	uncharacterized protein LOC110380377 isoform X5 [Helicoverpa armigera]
MSTRG.1317	HzChr03	11194814	11198717	2.74869	-0.718234	3.56242	0.0804885	0.231382	-0.324751	0.725934	0.408865	0.77138	XP_021190998.1	fumarylacetoacetate hydrolase domain-containing protein 2-like [Helicoverpa armigera]
MSTRG.1316	HzChr03	11218958	11220042	0.0272281	-0.443758	0.732572	0.40667	0.640564	1.08488	4.36137	0.0557965	0.375623
MSTRG.1315	HzChr03	11247455	11251777	3.35979	-0.551851	12.0952	0.0037675	0.0291095	-0.148072	0.878914	0.364622	0.735336
MSTRG.1314	HzChr03	11252733	11253853	-0.659389	-2.03859	8.34744	0.01204	0.0649057	0.373479	0.2885	0.599739	0.879433
MSTRG.1309	HzChr03	11291820	11292827	0.693533	-1.13532	2.76609	0.118964	0.296438	-0.453393	0.477762	0.500976	0.830601
MSTRG.1305	HzChr03	11304277	11314593	0.421929	2.36662	9.48902	0.0083159	0.0497556	1.14168	2.24367	0.156835	0.522046	XP_021190975.1	serine/threonine-protein kinase VRK1 [Helicoverpa armigera]
MSTRG.1304	HzChr03	11332238	11339042	0.251773	8.39267	3.39056	0.0911483	0.251068	-1.70534	0.339171	0.571402	0.867373	XP_021190980.1	toll-like receptor 4 [Helicoverpa armigera]
MSTRG.1271	HzChr03	12015018	12064531	5.7198	0.65099	0.496242	0.497794	0.720302	0	0	1	1	XP_021194990.1	membrane-bound alkaline phosphatase-like [Helicoverpa armigera]
MSTRG.1275	HzChr03	12027881	12029101	1.65554	9.59085	113.073	2.35686e-07	5.65863e-05	1.05369	4.09446	0.066536	0.394943
MSTRG.1272	HzChr03	12047739	12048154	-1.46894	0.402099	0.0403484	0.846034	0.942097	0	0	1	1
MSTRG.1267	HzChr03	12074618	12122367	4.54844	0.0452944	0.00186584	0.966171	0.994769	-0.383383	0.130493	0.723449	0.932821	XP_021194991.1	membrane-bound alkaline phosphatase-like [Helicoverpa armigera]
MSTRG.1269	HzChr03	12089353	12097420	0.862179	5.29187	73.9292	6.5236e-07	0.000104418	0.977188	4.117	0.0622072	0.387376
MSTRG.1268	HzChr03	12099509	12116973	7.27279	0.591287	0.790576	0.389321	0.624928	-0.678638	1.0377	0.326067	0.706488	XP_021194992.1	membrane-bound alkaline phosphatase-like [Helicoverpa armigera]
MSTRG.1268	HzChr03	12099509	12116973	7.27279	0.591287	0.790576	0.389321	0.624928	-0.678638	1.0377	0.326067	0.706488	XP_021194993.1	membrane-bound alkaline phosphatase-like [Helicoverpa armigera]
MSTRG.1896	HzChr04	41879	43355	1.11599	1.19411	21.9048	0.00036798	0.00598602	0.395566	2.49602	0.136781	0.495335
MSTRG.1900	HzChr04	178920	179221	1.11941	-8.51969	5.55645	0.0409914	0.149011	1.03032	0.234411	0.639065	0.896499
MSTRG.1901	HzChr04	186567	188547	2.34397	-4.1312	5.4265	0.0357354	0.136107	-1.54471	0.983881	0.338494	0.716853
MSTRG.1902	HzChr04	216717	217008	3.26673	-0.327732	0.0986012	0.75826	0.89412	-0.878747	0.702443	0.416393	0.776541
MSTRG.1903	HzChr04	218861	320673	7.90264	0.286678	2.13407	0.166456	0.365903	-0.439436	5.0038	0.0423391	0.339474	XP_021191335.1	nucleolar protein 58 [Helicoverpa armigera]
MSTRG.1904	HzChr04	233224	234443	1.83724	-0.506262	1.05711	0.321721	0.558308	0.958887	3.39314	0.08726	0.427944
MSTRG.1905	HzChr04	239459	242277	1.26971	-1.00187	5.25241	0.0381854	0.142181	-0.996258	5.02146	0.042027	0.338973
MSTRG.1906	HzChr04	266152	266389	0.35075	-7.03836	2.48941	0.154958	0.349518	6.40922	1.92133	0.204742	0.575974
MSTRG.1907	HzChr04	337344	337621	2.10946	10.9801	24.2313	0.000668144	0.0088483	-0.597443	0.224483	0.646176	0.900519
MSTRG.1908	HzChr04	338860	419547	3.08037	-0.124032	0.108522	0.746832	0.887239	0.261977	0.478412	0.500734	0.830488	XP_021191352.1	beclin 1-associated autophagy-related key regulator [Helicoverpa armigera]
MSTRG.1909	HzChr04	378508	379413	2.4982	-2.02808	15.2013	0.00167706	0.0167126	-0.454371	0.888868	0.362166	0.733924
STRG.1691	HzChr04	423838	424449	-0.838177	7.35359	10.0199	0.0140611	0.0722848	-5.97678	7.03304	0.0303119	0.301838	XP_021191362.1	golgin subfamily A member 3-like [Helicoverpa armigera]
STRG.1692	HzChr04	441422	442767	-1.17359	1.14771	0.229006	0.642913	0.824774	6.13696	3.50411	0.0917761	0.43442	XP_021191348.1	uncharacterized protein LOC110377000 [Helicoverpa armigera]
MSTRG.1910	HzChr04	443951	451779	1.51049	0.971918	1.12446	0.307356	0.543569	-0.116636	0.0160276	0.901102	0.996525	XP_021191351.1	mitochondrial uncoupling protein Bmcp [Helicoverpa armigera]
MSTRG.1911	HzChr04	452385	456511	3.28866	0.163766	0.685839	0.421678	0.654738	0.240164	1.4711	0.245531	0.624085	XP_021191340.1	plasmolipin-like [Helicoverpa armigera]
MSTRG.1912	HzChr04	457061	465940	0.382674	0.627557	2.72225	0.12153	0.300293	0.22465	0.346486	0.565622	0.863783
MSTRG.1914	HzChr04	464248	475988	3.03464	-0.49028	1.15062	0.30201	0.537191	-0.280591	0.368997	0.553519	0.85733	XP_021191349.1	CKLF-like MARVEL transmembrane domain-containing protein 4 [Helicoverpa armigera]
MSTRG.1915	HzChr04	476061	483981	2.50966	0.221508	1.0914	0.314122	0.550498	0.0786837	0.136169	0.717721	0.930879
MSTRG.1916	HzChr04	484310	496991	2.62343	-0.118904	0.314971	0.583647	0.786915	0.279047	1.72318	0.210702	0.58209	XP_021191341.1	kelch-like protein diablo [Helicoverpa armigera]
MSTRG.1917	HzChr04	538452	594682	0.866678	-6.71538	9.58006	0.0095673	0.0550067	0.0495369	0.00149037	0.969858	1	XP_021191330.1	uncharacterized protein LOC110376985 isoform X1 [Helicoverpa armigera]
MSTRG.1917	HzChr04	538452	594682	0.866678	-6.71538	9.58006	0.0095673	0.0550067	0.0495369	0.00149037	0.969858	1	XP_021191331.1	uncharacterized protein LOC110376985 isoform X2 [Helicoverpa armigera]
MSTRG.1918	HzChr04	545716	550001	1.31276	-1.60524	1.84054	0.196893	0.409353	0.380111	0.108555	0.746795	0.942106
MSTRG.1919	HzChr04	552440	563245	4.7621	0.180953	0.0908177	0.76768	0.899669	-2.42331	13.6118	0.00252287	0.128817	XP_021191332.1	maltase A1-like [Helicoverpa armigera]
MSTRG.1921	HzChr04	573879	575770	0.540357	-0.937807	1.56064	0.23254	0.457286	-0.423636	0.309272	0.587116	0.875541
MSTRG.1923	HzChr04	583423	583894	1.96178	10.2631	21.8013	0.000585811	0.00810467	-0.445045	0.124772	0.730222	0.9354
MSTRG.1924	HzChr04	623884	628475	3.76655	3.05018	52.8359	4.73717e-06	0.000378429	1.13916	8.0822	0.0132949	0.229214	XP_021183358.1	zinc finger protein 780A-like [Helicoverpa armigera]
MSTRG.1925	HzChr04	629169	640020	0.328723	3.18094	15.8274	0.00142186	0.014963	0.959849	1.66481	0.218252	0.592279
MSTRG.1926	HzChr04	638047	638604	-0.67251	3.77961	5.98386	0.0286116	0.117093	0.865028	0.315307	0.583528	0.874112
MSTRG.1927	HzChr04	646639	651377	4.70147	-0.386141	1.8139	0.199969	0.414086	-1.16526	15.836	0.00143447	0.118649	XP_021191327.1	uncharacterized protein LOC110376981 [Helicoverpa armigera]
MSTRG.1960	HzChr04	1038576	1039378	5.44146	-0.195663	1.62095	0.223994	0.446839	-0.107617	0.489769	0.495662	0.828051
MSTRG.1961	HzChr04	1040018	1053505	4.49025	-0.0915782	0.3277	0.576226	0.781925	-0.472511	8.65288	0.0108618	0.216984
MSTRG.1962	HzChr04	1057189	1061038	-0.456219	-0.54155	0.912977	0.355769	0.592754	0.150054	0.0697397	0.79562	0.960557
MSTRG.1963	HzChr04	1061464	1064659	-0.643093	-0.988954	1.8494	0.195662	0.407445	0.565658	0.587026	0.456481	0.802669
MSTRG.1964	HzChr04	1065271	1083008	-0.773274	-0.343916	0.183788	0.674756	0.847082	-0.00650813	6.36776e-05	0.993747	1	XP_021197111.1	enhancer of mRNA-decapping protein 4-like, partial [Helicoverpa armigera]
MSTRG.1968	HzChr04	1091596	1110545	3.65334	-0.195064	1.25882	0.281021	0.514538	0.0868426	0.250485	0.624623	0.891568
MSTRG.1970	HzChr04	1099773	1106434	0.549992	-0.0928035	0.0319638	0.860706	0.949476	0.3305	0.390861	0.54205	0.852967
MSTRG.1971	HzChr04	1111710	1138239	3.11124	-2.35866	7.98538	0.0137459	0.0713717	0.159092	0.0406492	0.843189	0.975892	XP_021197123.1	ras-related protein Rab-5B [Helicoverpa armigera]
MSTRG.1972	HzChr04	1138674	1140346	6.64725	-0.013537	0.00660928	0.936373	0.985796	-0.125009	0.563845	0.46533	0.809097	XP_021197121.1	rRNA-processing protein UTP23 homolog [Helicoverpa armigera]
MSTRG.1973	HzChr04	1140401	1146978	5.93449	0.139236	0.807518	0.38427	0.620045	-0.327341	4.46092	0.0534114	0.369249
MSTRG.1974	HzChr04	1147758	1176527	3.50404	-0.833646	4.86581	0.0450631	0.157946	1.11908	8.86718	0.0102101	0.210786
MSTRG.1975	HzChr04	1177114	1181431	0.949542	0.248207	1.28345	0.276564	0.509981	0.16412	0.561022	0.466428	0.80997
MSTRG.1976	HzChr04	1181926	1188289	1.90461	-0.391619	3.88677	0.0690632	0.209746	0.230384	1.33892	0.266866	0.645506
MSTRG.1977	HzChr04	1188959	1197948	4.15598	-0.120425	0.591108	0.454951	0.685467	0.125343	0.631859	0.440135	0.791669
MSTRG.1978	HzChr04	1199051	1282946	2.30803	-0.21442	0.211936	0.6525	0.832283	-1.14017	5.85881	0.0300704	0.300588	XP_021187685.1	uncharacterized protein LOC110374342 [Helicoverpa armigera]
MSTRG.1978	HzChr04	1199051	1282946	2.30803	-0.21442	0.211936	0.6525	0.832283	-1.14017	5.85881	0.0300704	0.300588	XP_021197114.1	nuclear factor of activated T-cells 5 isoform X2 [Helicoverpa armigera]
MSTRG.1978	HzChr04	1199051	1282946	2.30803	-0.21442	0.211936	0.6525	0.832283	-1.14017	5.85881	0.0300704	0.300588	XP_021197115.1	nuclear factor of activated T-cells 5 isoform X3 [Helicoverpa armigera]
MSTRG.1978	HzChr04	1199051	1282946	2.30803	-0.21442	0.211936	0.6525	0.832283	-1.14017	5.85881	0.0300704	0.300588	XP_021197117.1	nuclear factor of activated T-cells 5 isoform X4 [Helicoverpa armigera]
MSTRG.1983	HzChr04	1283228	1288247	4.47321	-0.0606874	0.122338	0.731794	0.878646	0.127675	0.541981	0.473945	0.815337
MSTRG.1984	HzChr04	1289407	1295626	0.224144	-0.190705	0.157234	0.697781	0.860201	0.572005	1.39508	0.25751	0.635808
MSTRG.1985	HzChr04	1296905	1297735	-0.580031	0.788713	0.280227	0.605052	0.801113	1.56205	1.04896	0.323549	0.705649
MSTRG.1986	HzChr04	1298352	1299942	-0.938247	-0.882081	0.343956	0.567105	0.775315	1.34848	0.750646	0.401209	0.765065
MSTRG.1987	HzChr04	1301232	1304879	-0.731982	0.953929	1.72586	0.210367	0.427761	0.97599	1.8272	0.198205	0.568776
MSTRG.1988	HzChr04	1305564	1306841	-0.771764	-0.954435	0.152888	0.701823	0.862872	0.8517	0.116429	0.738134	0.938868
MSTRG.1989	HzChr04	1308174	1314821	-1.19383	-0.336527	0.0813526	0.77971	0.907608	1.16849	0.92509	0.352697	0.726404
MSTRG.1991	HzChr04	1319253	1320505	-0.484425	-1.01066	0.504577	0.48945	0.712762	-0.0407876	0.000818945	0.977584	1
MSTRG.1992	HzChr04	1327146	1327555	2.72814	4.73869	5.68269	0.0322409	0.126588	-2.18149	1.51451	0.23923	0.618125
MSTRG.1996	HzChr04	1439147	1445483	3.49653	-0.040331	0.0642134	0.803693	0.920788	0.105275	0.437143	0.519394	0.840619
MSTRG.1997	HzChr04	1446729	1458480	0.950935	0.104371	0.136634	0.717263	0.87113	0.433008	2.3034	0.151668	0.513099	XP_021195123.1	methyltransferase-like protein 13 [Helicoverpa armigera]
MSTRG.1998	HzChr04	1457275	1537119	1.00441	0.778888	2.94741	0.108369	0.279575	-0.408022	0.778686	0.392659	0.759167	XP_021191791.1	uncharacterized protein LOC110377291, partial [Helicoverpa armigera]
MSTRG.1998	HzChr04	1457275	1537119	1.00441	0.778888	2.94741	0.108369	0.279575	-0.408022	0.778686	0.392659	0.759167	XP_021195120.1	SUN domain-containing ossification factor isoform X1 [Helicoverpa armigera]
MSTRG.1998	HzChr04	1457275	1537119	1.00441	0.778888	2.94741	0.108369	0.279575	-0.408022	0.778686	0.392659	0.759167	XP_021195122.1	SUN domain-containing ossification factor isoform X2 [Helicoverpa armigera]
MSTRG.1999	HzChr04	1470156	1586596	-0.705032	0.61128	0.547461	0.47176	0.699296	-0.748457	0.774222	0.393983	0.760246	XP_021195119.1	adenylate kinase isoenzyme 1-like isoform X4 [Helicoverpa armigera]
MSTRG.2000	HzChr04	1537674	1538695	8.05821	-0.0672175	0.180863	0.677191	0.848376	-0.0528464	0.111683	0.743262	0.940794	XP_021195129.1	oligosaccharyltransferase complex subunit ostc-A [Helicoverpa armigera]
MSTRG.2001	HzChr04	1538594	1541474	2.53529	-0.12886	0.247556	0.626637	0.815043	0.284034	1.21169	0.289833	0.671939
MSTRG.2003	HzChr04	1589202	1590509	0.542491	-1.40997	6.00369	0.0282534	0.11603	-0.226436	0.168093	0.688107	0.919442
MSTRG.2004	HzChr04	1607756	1608014	2.76624	5.42607	15.9785	0.0013857	0.0146777	-0.739373	0.436992	0.519576	0.840619
MSTRG.2005	HzChr04	1632720	1641164	0.687613	-0.121397	0.147322	0.706957	0.86454	0.332383	1.14301	0.303365	0.685812	XP_021195124.1	heparin sulfate O-sulfotransferase [Helicoverpa armigera]
MSTRG.2006	HzChr04	1644125	1656998	-0.370347	-1.33674	0.890486	0.361743	0.598112	-1.52701	1.24215	0.284289	0.666165	XP_021195105.1	tripartite motif-containing protein 45 [Helicoverpa armigera]
MSTRG.2007	HzChr04	1657361	1676389	2.46193	-0.514775	6.98037	0.0195153	0.0897288	0.475639	5.99402	0.0283604	0.29514	XP_021195106.1	mediator of RNA polymerase II transcription subunit 15-like isoform X1 [Helicoverpa armigera]
MSTRG.2007	HzChr04	1657361	1676389	2.46193	-0.514775	6.98037	0.0195153	0.0897288	0.475639	5.99402	0.0283604	0.29514	XP_021195108.1	mediator of RNA polymerase II transcription subunit 15-like isoform X3 [Helicoverpa armigera]
MSTRG.2008	HzChr04	1666194	1667275	0.312408	0.57667	1.91652	0.188224	0.396532	0.150085	0.130445	0.723442	0.932821
MSTRG.2009	HzChr04	1678629	1681995	3.44582	0.838341	29.3576	9.53345e-05	0.00248195	-0.260941	2.88191	0.11201	0.459852
MSTRG.2010	HzChr04	1686575	1688854	1.43128	-0.343493	1.20724	0.290683	0.524377	-0.9693	9.22639	0.0089916	0.201512
MSTRG.2016	HzChr04	1734995	1736461	1.26251	10.1506	61.7897	5.39689e-06	0.000402413	-0.407567	0.293887	0.597952	0.878689
MSTRG.2020	HzChr04	1785812	1792836	-1.07656	3.01042	1.78429	0.20346	0.418576	-2.94162	1.71621	0.211791	0.583325
MSTRG.2021	HzChr04	1798564	1812248	-0.0936166	0.911334	0.351917	0.562727	0.771812	0.812644	0.290025	0.598874	0.879256
MSTRG.2022	HzChr04	1801753	1802736	-0.181373	-0.00632137	4.49676e-05	0.994746	1	-0.58013	0.402363	0.536298	0.850274
MSTRG.2024	HzChr04	1837761	1838166	2.14679	1.41115	1.74876	0.207755	0.423986	0.0483714	0.0021638	0.963572	1
MSTRG.2027	HzChr04	1898194	1898781	1.76492	2.26272	11.6314	0.00436049	0.0319942	-1.56138	5.81282	0.0306203	0.302585
MSTRG.2029	HzChr04	1908536	1910081	5.19317	-0.224634	0.679514	0.423919	0.656566	-0.508484	3.45123	0.0848971	0.425096
MSTRG.2032	HzChr04	1957573	1958007	0.260456	8.74195	9.77248	0.00903996	0.0529133	-0.181688	0.0104018	0.920499	1
MSTRG.2033	HzChr04	1964097	2004887	0.555605	0.609874	0.421508	0.526955	0.742788	-0.32881	0.122655	0.731516	0.935784	XP_021187208.1	coiled-coil and C2 domain-containing protein 1-like isoform X2 [Helicoverpa armigera]
MSTRG.2034	HzChr04	1973663	1974532	9.72901	7.60363	47.007	8.95789e-06	0.000553043	-0.878434	1.10345	0.311747	0.694262
MSTRG.2035	HzChr04	1989081	1998994	0.331144	0.128984	0.0390428	0.846245	0.94217	-0.00881841	0.000188512	0.989242	1
MSTRG.2036	HzChr04	2005424	2038712	3.14335	0.12515	0.555239	0.468689	0.696773	0.107783	0.413419	0.530781	0.846532	XP_021187186.1	cytoplasmic dynein 1 light intermediate chain 2 [Helicoverpa armigera]
MSTRG.2037	HzChr04	2012817	2013639	-0.765134	-0.429186	0.140597	0.713394	0.868465	0.125916	0.0110622	0.91775	1
MSTRG.2038	HzChr04	2039902	2081817	2.30213	-0.496725	3.19174	0.0959954	0.259031	0.337421	1.45046	0.248708	0.627824	XP_021187176.1	endonuclease/exonuclease/phosphatase family domain-containing protein 1-like isoform X1 [Helicoverpa armigera]
MSTRG.2039	HzChr04	2045971	2065419	-0.142282	2.29839	2.01103	0.178575	0.38357	-0.0149255	8.09967e-05	0.992949	1
MSTRG.2041	HzChr04	2092455	2104582	3.07125	-0.635158	6.34603	0.024752	0.105546	-0.300379	1.44008	0.250327	0.628151	XP_021187185.1	maestro heat-like repeat-containing protein family member 1 [Helicoverpa armigera]
MSTRG.2042	HzChr04	2105595	2107845	-0.870814	1.02799	1.45399	0.248161	0.477077	0.807308	0.884347	0.363188	0.73458
MSTRG.2043	HzChr04	2109061	2191942	-0.376692	-1.27044	0.749607	0.401556	0.63649	0.267258	0.0388258	0.846697	0.976878	XP_021187192.1	TBC1 domain family member 24 isoform X2 [Helicoverpa armigera]
MSTRG.2043	HzChr04	2109061	2191942	-0.376692	-1.27044	0.749607	0.401556	0.63649	0.267258	0.0388258	0.846697	0.976878	XP_021187195.1	TBC1 domain family member 24 isoform X4 [Helicoverpa armigera]
MSTRG.2043	HzChr04	2109061	2191942	-0.376692	-1.27044	0.749607	0.401556	0.63649	0.267258	0.0388258	0.846697	0.976878	XP_021187197.1	TBC1 domain family member 24 isoform X5 [Helicoverpa armigera]
MSTRG.2043	HzChr04	2109061	2191942	-0.376692	-1.27044	0.749607	0.401556	0.63649	0.267258	0.0388258	0.846697	0.976878	XP_021187198.1	TBC1 domain family member 24 isoform X6 [Helicoverpa armigera]
MSTRG.2045	HzChr04	2195005	2197870	1.54333	0.0656758	0.00914367	0.925209	0.980973	-0.277768	0.164991	0.690896	0.920603	XP_021187200.1	repetin-like [Helicoverpa armigera]
MSTRG.2046	HzChr04	2198218	2201838	7.57219	0.0965862	0.271906	0.610325	0.803744	-0.0206871	0.0124747	0.912678	0.999408
MSTRG.2091	HzChr04	3232698	3239010	-1.05219	1.15314	1.00931	0.332364	0.569827	0.127393	0.0107076	0.919073	1
MSTRG.2092	HzChr04	3293944	3299693	3.36214	-0.179602	2.25313	0.15588	0.350804	0.00499917	0.00175103	0.967222	1	XP_021182827.1	transcription initiation factor IIB [Helicoverpa armigera]
MSTRG.2095	HzChr04	3337951	3370342	3.96433	0.199307	0.583744	0.457772	0.687719	-0.814555	9.62706	0.00794042	0.192245
MSTRG.2096	HzChr04	3370593	3371288	0.700044	3.08748	10.0218	0.00705778	0.0443764	-1.54218	2.7545	0.119761	0.473528
MSTRG.2097	HzChr04	3374246	3382794	6.52703	-0.409433	9.79834	0.00748774	0.0463825	-0.393222	9.03239	0.00957908	0.206186
MSTRG.2098	HzChr04	3383281	3385517	4.0968	-0.309522	1.73315	0.209472	0.426543	-0.425038	3.24936	0.0933431	0.437847
MSTRG.2099	HzChr04	3385467	3435157	1.55109	1.06606	7.62566	0.0154643	0.0771727	-0.290633	0.59385	0.453929	0.801956	XP_021182905.1	mRNA-capping enzyme [Helicoverpa armigera]
MSTRG.2099	HzChr04	3385467	3435157	1.55109	1.06606	7.62566	0.0154643	0.0771727	-0.290633	0.59385	0.453929	0.801956	XP_021182906.1	alsin [Helicoverpa armigera]
MSTRG.2100	HzChr04	3396259	3477897	8.55763	-0.227247	1.41486	0.254319	0.484742	-0.0922373	0.233231	0.636711	0.895875	XP_021182849.1	eukaryotic translation initiation factor 3 subunit H [Helicoverpa armigera]
MSTRG.2100	HzChr04	3396259	3477897	8.55763	-0.227247	1.41486	0.254319	0.484742	-0.0922373	0.233231	0.636711	0.895875	XP_021182902.1	carboxy-terminal domain RNA polymerase II polypeptide A small phosphatase 1 [Helicoverpa armigera]
MSTRG.2101	HzChr04	3427095	3430608	-1.651	5.47663	3.25904	0.124059	0.303706	0	0	1	1
MSTRG.2102	HzChr04	3469647	3487883	0.645728	-0.099177	0.0633715	0.804955	0.92136	-0.714485	3.24036	0.0937412	0.43837	XP_021182839.1	homeobox protein aristaless-like [Helicoverpa armigera]
MSTRG.2104	HzChr04	3581981	3646682	2.97234	-0.839819	13.8845	0.00230986	0.0207616	-0.258946	1.33531	0.267483	0.645916
MSTRG.2105	HzChr04	3621278	3625643	0.562843	0.256422	0.839334	0.375323	0.611238	-0.0715965	0.0642994	0.803565	0.963287
MSTRG.2108	HzChr04	3644328	3645720	0.515942	0.183715	0.215636	0.649628	0.830287	0.187064	0.226701	0.641433	0.897687
MSTRG.2109	HzChr04	3644615	3703163	0.703669	1.17427	9.8907	0.00727321	0.0454006	-0.671642	3.1525	0.0978626	0.445502
MSTRG.2110	HzChr04	3684479	3701755	-1.15698	6.85714	15.2173	0.00217325	0.0199973	-0.680508	0.242557	0.631404	0.894277
MSTRG.2111	HzChr04	3704228	3712073	5.6787	0.084692	0.207689	0.655675	0.834969	-0.314081	2.83791	0.11454	0.464734
MSTRG.2115	HzChr04	3819019	3844443	1.87149	2.34105	1.77694	0.204339	0.419917	0.463327	0.0761721	0.786686	0.957592
MSTRG.2116	HzChr04	3833123	3834481	6.19327	0.645892	5.28819	0.0378061	0.141215	0.211502	0.569342	0.463335	0.80752
MSTRG.2117	HzChr04	3856081	3858394	1.62201	-0.136925	0.198251	0.663043	0.840143	0.305744	1.01829	0.330295	0.710062
MSTRG.2119	HzChr04	3912052	3947490	3.76352	-0.340436	0.804428	0.385312	0.621108	0.51832	1.89172	0.191152	0.561969
MSTRG.2121	HzChr04	4028799	4036440	0.0666871	-1.00753	1.56356	0.232008	0.456481	-0.232103	0.0873082	0.772043	0.950602	XP_021182814.1	protein tramtrack, beta isoform-like [Helicoverpa armigera]
MSTRG.2126	HzChr04	4124173	4205884	1.84661	-0.181446	0.327567	0.576303	0.781925	0.263265	0.681941	0.422969	0.780567	XP_021182894.1	serine/threonine-protein kinase 26 isoform X1 [Helicoverpa armigera]
MSTRG.2126	HzChr04	4124173	4205884	1.84661	-0.181446	0.327567	0.576303	0.781925	0.263265	0.681941	0.422969	0.780567	XP_021182896.1	serine/threonine-protein kinase 26 isoform X3 [Helicoverpa armigera]
MSTRG.2127	HzChr04	4202086	4244628	5.02604	0.836464	1.48754	0.243245	0.470978	-0.410113	0.362751	0.556851	0.85886	XP_021182770.1	tetratricopeptide repeat protein 14 homolog isoform X2 [Helicoverpa armigera]
MSTRG.2127	HzChr04	4202086	4244628	5.02604	0.836464	1.48754	0.243245	0.470978	-0.410113	0.362751	0.556851	0.85886	XP_021182772.1	tetratricopeptide repeat protein 14 homolog isoform X4 [Helicoverpa armigera]
MSTRG.2127	HzChr04	4202086	4244628	5.02604	0.836464	1.48754	0.243245	0.470978	-0.410113	0.362751	0.556851	0.85886	XP_021182773.1	tetratricopeptide repeat protein 14 homolog isoform X5 [Helicoverpa armigera]
MSTRG.2128	HzChr04	4208372	4208746	-1.64165	5.50802	2.95901	0.125407	0.305852	5.86789	3.07242	0.119415	0.473316
MSTRG.2129	HzChr04	4216601	4220873	6.14167	-0.0014426	7.61868e-05	0.993161	1	-0.337566	4.17101	0.060718	0.385495	XP_021182815.1	UPF0430 protein CG31712 [Helicoverpa armigera]
MSTRG.2130	HzChr04	4227239	4228875	7.88536	-0.173431	0.404281	0.535398	0.750831	-0.399327	2.13697	0.166415	0.533656
MSTRG.2132	HzChr04	4282521	4283072	4.33242	12.6672	22.4021	0.0005261	0.00757274	-4.44601	7.12112	0.0209127	0.267653
MSTRG.2133	HzChr04	4289613	4294916	1.60725	-0.0102044	0.000329355	0.985783	1	0.832065	2.13915	0.166214	0.533656	XP_021182790.1	uncharacterized protein LOC110371036 isoform X2 [Helicoverpa armigera]
MSTRG.2138	HzChr04	4546405	4581739	2.60101	-0.377902	0.192628	0.667603	0.842956	-0.026525	0.00092801	0.976138	1	XP_021182868.1	protein l(2)37Cc [Helicoverpa armigera]
MSTRG.2139	HzChr04	4549243	4553159	1.59007	1.38076	30.6102	7.78288e-05	0.00220317	0.305643	1.53767	0.235642	0.61446
MSTRG.2140	HzChr04	4556769	4573505	8.07882	-0.232111	1.46699	0.24616	0.474708	-0.0023617	0.000152055	0.990338	1	XP_021182817.1	myosin-VIIa-like isoform X2 [Helicoverpa armigera]
MSTRG.2140	HzChr04	4556769	4573505	8.07882	-0.232111	1.46699	0.24616	0.474708	-0.0023617	0.000152055	0.990338	1	XP_021182893.1	protein artichoke-like [Helicoverpa armigera]
MSTRG.2142	HzChr04	4583339	4588086	3.22106	0.97686	3.95365	0.0671957	0.206314	1.30439	7.14754	0.0184888	0.254108
MSTRG.2143	HzChr04	4588302	4598913	2.93455	-0.494035	8.38641	0.0118817	0.0642931	-0.43387	6.4115	0.0241416	0.279411	XP_021182821.1	transmembrane protein 18 [Helicoverpa armigera]
MSTRG.2144	HzChr04	4599281	4604188	4.23679	0.0823586	0.190446	0.669298	0.844438	-0.765814	16.3797	0.00123381	0.110312
MSTRG.2145	HzChr04	4603143	4722188	0.767139	-0.710207	0.553105	0.469656	0.697519	0.470645	0.248811	0.625852	0.892451	XP_021182834.1	LIM domain transcription factor LMO4 isoform X2 [Helicoverpa armigera]
MSTRG.2146	HzChr04	4604024	4606097	2.85463	0.0418217	0.0681898	0.797848	0.917763	0.368831	5.26642	0.037966	0.32819
MSTRG.2147	HzChr04	4606511	4616435	2.31433	-0.285738	0.496105	0.493004	0.716168	0.754335	3.36371	0.0884325	0.430055	XP_021182806.1	manganese-transporting ATPase 13A1 [Helicoverpa armigera]
MSTRG.2149	HzChr04	4764483	4811352	-1.19699	-4.19404	2.31604	0.154703	0.349141	0.0647471	0.000891877	0.976681	1	XP_021182858.1	sodium-coupled monocarboxylate transporter 1-like isoform X2 [Helicoverpa armigera]
MSTRG.2154	HzChr04	4864420	4877283	2.29199	-0.456538	2.21512	0.159162	0.355414	1.04039	11.4553	0.00452945	0.161271	XP_021182793.1	MAGUK p55 subfamily member 6 isoform X1 [Helicoverpa armigera]
MSTRG.2155	HzChr04	4877275	4878382	0.394638	0.109691	0.0611996	0.808253	0.922991	-0.800847	3.04968	0.102967	0.450243
MSTRG.2156	HzChr04	4878444	4881114	-1.52034	0.106772	0.0015106	0.969991	0.995895	0	0	1	1
MSTRG.2157	HzChr04	4878673	4880718	4.46696	0.314907	4.13678	0.0616571	0.194924	-0.236667	2.32017	0.150294	0.510764
MSTRG.2158	HzChr04	4886362	4893252	4.43516	0.00549397	0.00150743	0.969586	0.995755	0.328261	5.36458	0.0364692	0.322795	XP_021182766.1	ATP-dependent RNA helicase dbp2-like [Helicoverpa armigera]
MSTRG.2159	HzChr04	4896108	4900320	1.55434	-0.295202	1.58683	0.228672	0.452217	0.385258	2.7194	0.121709	0.476389
MSTRG.2160	HzChr04	4901867	4919851	-1.65707	5.72515	21.0881	0.00406228	0.030585	-5.12548e-15	0	1	1	XP_021182831.1	abhydrolase domain-containing protein 2 [Helicoverpa armigera]
MSTRG.2162	HzChr04	4926882	4960204	3.00245	-0.220682	1.00218	0.334018	0.571312	-0.143418	0.422158	0.526533	0.844358	XP_021182864.1	transformation/transcription domain-associated protein isoform X5 [Helicoverpa armigera]
MSTRG.2162	HzChr04	4926882	4960204	3.00245	-0.220682	1.00218	0.334018	0.571312	-0.143418	0.422158	0.526533	0.844358	XP_021182866.1	transformation/transcription domain-associated protein isoform X7 [Helicoverpa armigera]
MSTRG.2163	HzChr04	4961293	5009938	3.33915	-0.12892	0.319648	0.580898	0.785091	0.57877	6.45427	0.0237522	0.278754	XP_021182909.1	fibronectin type-III domain-containing protein 3a [Helicoverpa armigera]
MSTRG.2165	HzChr04	5023269	5026739	1.45626	-0.0849474	0.12392	0.73014	0.877969	0.192859	0.632523	0.4399	0.791498
MSTRG.2166	HzChr04	5026897	5035848	2.29858	0.47344	0.97768	0.33997	0.576337	1.37206	8.19644	0.0127849	0.226387
MSTRG.2167	HzChr04	5047573	5049298	4.33068	-0.278762	4.01197	0.0652294	0.202369	0.198194	2.02374	0.177072	0.543886
MSTRG.2200	HzChr04	5404737	5572005	6.73896	-0.036838	0.0178293	0.895725	0.967514	-0.0223356	0.00656299	0.936608	1	XP_021182768.1	RB1-inducible coiled-coil protein 1 [Helicoverpa armigera]
MSTRG.2200	HzChr04	5404737	5572005	6.73896	-0.036838	0.0178293	0.895725	0.967514	-0.0223356	0.00656299	0.936608	1	XP_021182780.1	glucose-6-phosphate 1-dehydrogenase [Helicoverpa armigera]
MSTRG.2200	HzChr04	5404737	5572005	6.73896	-0.036838	0.0178293	0.895725	0.967514	-0.0223356	0.00656299	0.936608	1	XP_021183358.1	zinc finger protein 780A-like [Helicoverpa armigera]
MSTRG.2200	HzChr04	5404737	5572005	6.73896	-0.036838	0.0178293	0.895725	0.967514	-0.0223356	0.00656299	0.936608	1	XP_021197439.1	LOW QUALITY PROTEIN: uncharacterized protein C05D11 1-like [Helicoverpa armigera]
MSTRG.2201	HzChr04	5415045	5427820	1.89356	-0.0250313	0.00116411	0.973276	0.996488	0.810918	1.30253	0.273371	0.651996	XP_021182826.1	inactive dipeptidyl peptidase 10 isoform X4 [Helicoverpa armigera]
MSTRG.2202	HzChr04	5429173	5436124	-0.58937	0.585732	0.986208	0.337769	0.574566	-0.503056	0.723797	0.409424	0.77138
MSTRG.2203	HzChr04	5508820	5545591	3.21351	-0.218056	2.21585	0.159098	0.355334	0.317237	4.69246	0.0483152	0.356968	XP_021197436.1	protein ultraspiracle homolog isoform X1 [Helicoverpa armigera]
MSTRG.2203	HzChr04	5508820	5545591	3.21351	-0.218056	2.21585	0.159098	0.355334	0.317237	4.69246	0.0483152	0.356968	XP_021197438.1	protein ultraspiracle homolog isoform X2 [Helicoverpa armigera]
MSTRG.2204	HzChr04	5549825	5555022	0.656627	0.795536	5.10843	0.0405293	0.148045	0.486006	1.85108	0.195471	0.566067
MSTRG.2205	HzChr04	5576873	5642881	5.18886	-0.450346	3.23462	0.0941739	0.256129	0.205806	0.676075	0.425031	0.781588	XP_021197440.1	long-chain fatty acid transport protein 4 isoform X1 [Helicoverpa armigera]
MSTRG.2205	HzChr04	5576873	5642881	5.18886	-0.450346	3.23462	0.0941739	0.256129	0.205806	0.676075	0.425031	0.781588	XP_021197441.1	long-chain fatty acid transport protein 4 isoform X2 [Helicoverpa armigera]
MSTRG.2206	HzChr04	5590322	5602848	1.65567	2.39974	17.7607	0.000912394	0.0109428	0.545179	0.98469	0.338302	0.7168
MSTRG.2208	HzChr04	5644465	5669438	2.66194	-0.0284869	0.0225534	0.882798	0.960665	-0.0937533	0.241593	0.630785	0.894277	XP_021197440.1	long-chain fatty acid transport protein 4 isoform X1 [Helicoverpa armigera]
MSTRG.2209	HzChr04	5675610	5690379	2.65685	-0.150853	0.658626	0.430825	0.663772	-0.331341	3.13981	0.0984757	0.445997	XP_021197443.1	golgin subfamily A member 1 [Helicoverpa armigera]
MSTRG.2210	HzChr04	5692530	5806370	4.89514	0.0623052	0.116561	0.737938	0.882273	0.441692	5.85016	0.0300098	0.300356
MSTRG.2211	HzChr04	5749127	6182264	13.184	0.73281	5.03699	0.041917	0.151043	-0.489263	2.25848	0.155626	0.520117	XP_021194753.1	dolichyldiphosphatase 1-like [Helicoverpa armigera]
MSTRG.2212	HzChr04	5894153	5894434	5.57862	0.730159	8.09366	0.0132376	0.0695889	0.156196	0.373512	0.55113	0.855942
MSTRG.2213	HzChr04	5996695	6066830	8.49414	-0.229795	0.268788	0.612444	0.805495	-0.785218	3.09581	0.100867	0.447242	XP_021194751.1	uncharacterized protein LOC110379405 [Helicoverpa armigera]
MSTRG.2213	HzChr04	5996695	6066830	8.49414	-0.229795	0.268788	0.612444	0.805495	-0.785218	3.09581	0.100867	0.447242	XP_021194760.1	alpha-tocopherol transfer protein [Helicoverpa armigera]
MSTRG.2217	HzChr04	6108156	6122155	2.29442	0.161134	0.375038	0.550231	0.763213	-0.0875795	0.108401	0.746917	0.942106
MSTRG.2219	HzChr04	6123294	6145146	1.75922	0.661094	3.6253	0.077974	0.227074	0.220632	0.410912	0.532011	0.847365
MSTRG.2220	HzChr04	6138188	6140584	0.0157861	-0.155937	0.0150514	0.904144	0.972235	0.23103	0.031543	0.861642	0.982801
MSTRG.2221	HzChr04	6141723	6144735	-0.521541	-0.848124	1.16912	0.29812	0.532387	-0.263499	0.107127	0.748352	0.94249
MSTRG.2222	HzChr04	6145802	6148046	4.19586	-0.0248072	0.0239685	0.879207	0.958617	0.156869	0.95256	0.345872	0.721169
MSTRG.2223	HzChr04	6148212	6149814	7.20246	0.165328	1.19501	0.293042	0.526874	-0.320887	4.49887	0.052534	0.366382	XP_021194759.1	coiled-coil domain-containing protein 25 [Helicoverpa armigera]
MSTRG.2224	HzChr04	6149925	6151055	4.92727	-0.375372	8.46047	0.0115875	0.0630168	0.0637682	0.243892	0.629178	0.893608
MSTRG.2226	HzChr04	6169050	6174423	4.5064	-0.0615698	0.149139	0.70525	0.864231	0.0553618	0.120198	0.73405	0.936572
MSTRG.2227	HzChr04	6174588	6176976	1.19223	-1.15085	5.3177	0.0371894	0.139399	1.80445	12.9233	0.00299426	0.13672
MSTRG.2228	HzChr04	6184467	6195623	2.12671	0.100183	0.217733	0.648055	0.829012	0.581537	7.29381	0.0174107	0.250563	XP_021194765.1	protein suppressor 2 of zeste-like [Helicoverpa armigera]
MSTRG.2229	HzChr04	6195615	6213217	-1.15049	-0.0941195	0.00175862	0.96726	0.994946	-5.55064	3.62985	0.0817119	0.421081	XP_021194745.1	uncharacterized protein LOC110379400 [Helicoverpa armigera]
MSTRG.2230	HzChr04	6214073	6215560	4.9619	-0.0652182	0.095918	0.761413	0.89589	0.174308	0.683755	0.422368	0.780054
MSTRG.2231	HzChr04	6215290	6221351	2.77391	0.212262	0.94877	0.346802	0.583479	-0.322583	2.17551	0.162675	0.530092	XP_021189290.1	transcription termination factor, mitochondrial isoform X1 [Helicoverpa armigera]
MSTRG.2233	HzChr04	6221521	6225123	2.56589	-0.149887	0.0625206	0.806278	0.921979	0.540417	0.78563	0.390767	0.757843	XP_021189250.1	U2 small nuclear ribonucleoprotein auxiliary factor 35 kDa subunit-related protein 2 [Helicoverpa armigera]
MSTRG.2235	HzChr04	6231773	6240879	1.94305	0.217868	0.0265667	0.872911	0.955641	0.443633	0.112708	0.742184	0.940608	XP_021189190.1	centrosomin isoform X1 [Helicoverpa armigera]
MSTRG.2235	HzChr04	6231773	6240879	1.94305	0.217868	0.0265667	0.872911	0.955641	0.443633	0.112708	0.742184	0.940608	XP_021189191.1	centrosomin isoform X2 [Helicoverpa armigera]
MSTRG.2236	HzChr04	6245137	6246043	6.62501	0.261606	1.41576	0.254266	0.484742	0.00420668	0.000365508	0.985022	1	XP_021189188.1	28S ribosomal protein S18b, mitochondrial [Helicoverpa armigera]
MSTRG.2239	HzChr04	6262192	6270621	2.07578	-0.288752	1.36877	0.261837	0.493537	0.548302	4.87812	0.0446402	0.343682	XP_021189285.1	transmembrane protein 268 isoform X1 [Helicoverpa armigera]
MSTRG.2239	HzChr04	6262192	6270621	2.07578	-0.288752	1.36877	0.261837	0.493537	0.548302	4.87812	0.0446402	0.343682	XP_021189286.1	transmembrane protein 268 isoform X2 [Helicoverpa armigera]
MSTRG.2240	HzChr04	6262589	6263198	1.42246	3.1276	17.7692	0.00091063	0.0109318	-0.886957	1.73109	0.209934	0.581083
MSTRG.2241	HzChr04	6270950	6272625	0.713768	-1.26826	14	0.0022408	0.020416	-1.55362	19.9798	0.000547513	0.0855242
MSTRG.2242	HzChr04	6273037	6280292	3.5425	-0.711958	19.315	0.000631583	0.00853252	-0.527128	10.5161	0.00599373	0.17621
MSTRG.2243	HzChr04	6285135	6300921	6.28028	0.346301	3.30185	0.0909811	0.250706	0.0560201	0.0866537	0.772858	0.950855	XP_021189186.1	serine/threonine-protein phosphatase 1 regulatory subunit 10 [Helicoverpa armigera]
MSTRG.2245	HzChr04	6301904	6303935	7.91892	-0.0990739	0.45258	0.512223	0.731669	-0.366241	6.16587	0.0265271	0.287696	XP_021189217.1	calcium load-activated calcium channel [Helicoverpa armigera]
MSTRG.2246	HzChr04	6304113	6307847	4.53426	-0.332233	6.17771	0.026406	0.110619	-0.179661	1.78823	0.202772	0.573503
MSTRG.2247	HzChr04	6308086	6314072	0.0522563	4.17049	8.12487	0.0149891	0.0754985	-4.82842	6.05498	0.030531	0.302163	XP_021189215.1	putative ATP-dependent RNA helicase DHX33 [Helicoverpa armigera]
MSTRG.2250	HzChr04	6529523	6565254	1.44779	-1.94092	2.09365	0.170476	0.371842	-0.940465	0.498349	0.492095	0.825947	XP_021189295.1	sodium/hydrogen exchanger 9B2-like isoform X1 [Helicoverpa armigera]
MSTRG.2252	HzChr04	6588521	6631985	3.39337	-0.363051	2.37591	0.145838	0.33674	-0.0686599	0.0840239	0.776227	0.953231	XP_021189267.1	sodium/hydrogen exchanger 9B2-like isoform X1 [Helicoverpa armigera]
MSTRG.2254	HzChr04	6631973	6672834	4.0958	0.112248	0.00849133	0.927918	0.982685	2.15847	2.87618	0.112566	0.460738	XP_021189204.1	protein CWC15 homolog [Helicoverpa armigera]
MSTRG.2254	HzChr04	6631973	6672834	4.0958	0.112248	0.00849133	0.927918	0.982685	2.15847	2.87618	0.112566	0.460738	XP_021189219.1	probable G-protein coupled receptor Mth-like 3 [Helicoverpa armigera]
MSTRG.2255	HzChr04	6657777	6664456	4.16552	-0.035732	0.01593	0.901399	0.970186	0.605125	4.61277	0.0501644	0.360322
MSTRG.2256	HzChr04	6671892	6676761	5.0536	-0.106902	0.536328	0.476216	0.702565	0.264831	3.27378	0.092229	0.435532	XP_021189203.1	RNA-binding protein 39 [Helicoverpa armigera]
MSTRG.2257	HzChr04	6678556	6687478	3.18981	-0.0953832	0.0631152	0.805379	0.92152	-0.515138	1.83377	0.197669	0.567991	XP_021189280.1	uncharacterized protein LOC110375481 isoform X2 [Helicoverpa armigera]
MSTRG.2259	HzChr04	6688054	6690442	6.77096	-0.0923532	0.30685	0.588486	0.790153	0.239973	2.06972	0.172546	0.539571
MSTRG.2260	HzChr04	6691342	6695503	3.87266	0.28704	4.34946	0.0560901	0.183341	-0.29587	4.59585	0.0503684	0.361083	XP_021189221.1	2',5'-phosphodiesterase 12 [Helicoverpa armigera]
MSTRG.2261	HzChr04	6700319	6700829	1.09595	-0.699414	0.221098	0.645626	0.827128	1.00623	0.48783	0.49662	0.828232
MSTRG.2262	HzChr04	6702042	6703300	9.54941	-0.138399	0.860379	0.369576	0.605912	-0.0893457	0.358512	0.559037	0.860593
MSTRG.2263	HzChr04	6704484	6714486	-0.604668	1.66809	0.874161	0.366046	0.602028	0.832881	0.25003	0.625015	0.891847	XP_021189247.1	frizzled-7 [Helicoverpa armigera]
MSTRG.2264	HzChr04	6714763	6719690	0.78234	-0.146775	0.0826409	0.778023	0.906051	0.746908	2.15203	0.164803	0.532553	XP_021189211.1	anaphase-promoting complex subunit 5 [Helicoverpa armigera]
MSTRG.2265	HzChr04	6719686	6724802	2.35366	-0.0235442	0.0230732	0.881466	0.959825	-0.0860275	0.307544	0.588069	0.875552
MSTRG.2266	HzChr04	6751372	6759024	0.130648	3.47323	5.45233	0.0353635	0.135048	0.580487	0.191732	0.668325	0.910746	XP_021189259.1	adenylate cyclase type 8 [Helicoverpa armigera]
MSTRG.2267	HzChr04	6760007	6761150	6.39928	-0.648979	10.2702	0.00646719	0.0418097	-0.784099	14.8972	0.00177983	0.124986	XP_021187608.1	prefoldin subunit 1 [Helicoverpa armigera]
MSTRG.2268	HzChr04	6767194	6776734	5.70275	-0.180129	0.268714	0.612493	0.805495	1.27925	13.278	0.00275791	0.133419
MSTRG.2269	HzChr04	6786888	6803120	6.23155	0.20902	0.622084	0.443752	0.676137	1.35704	25.4769	0.000192216	0.0593352	XP_021189205.1	uncharacterized protein LOC110375430 isoform X1 [Helicoverpa armigera]
MSTRG.2269	HzChr04	6786888	6803120	6.23155	0.20902	0.622084	0.443752	0.676137	1.35704	25.4769	0.000192216	0.0593352	XP_021189206.1	uncharacterized protein LOC110375430 isoform X2 [Helicoverpa armigera]
MSTRG.2270	HzChr04	6798849	6799419	7.43077	-0.150619	0.847498	0.373078	0.609189	0.0199624	0.0148764	0.904683	0.997043
MSTRG.2271	HzChr04	6802887	6804976	-0.530997	0.0867852	0.00309369	0.956449	0.99278	-1.76825	1.19953	0.292356	0.674448	XP_021189229.1	transcription termination factor 3, mitochondrial [Helicoverpa armigera]
MSTRG.2272	HzChr04	6804420	6809722	5.87256	0.0992683	0.569021	0.46333	0.692537	0.0281163	0.0456311	0.833972	0.973322	XP_021189227.1	alanine--tRNA ligase, cytoplasmic [Helicoverpa armigera]
MSTRG.2274	HzChr04	6818591	6828730	4.54162	0.0103018	0.00271094	0.959222	0.993842	-0.388979	3.81375	0.0714236	0.402528
MSTRG.2275	HzChr04	6830152	6842121	2.76924	-0.738714	16.2403	0.00127587	0.0139123	-0.16241	0.78558	0.390628	0.757843
MSTRG.2276	HzChr04	6842680	6845052	1.53227	0.152187	0.330597	0.574565	0.780433	0.0945794	0.128027	0.725901	0.934125
MSTRG.2277	HzChr04	6846837	6848802	8.16292	0.0521631	0.0476771	0.830369	0.935907	-0.424124	3.14093	0.0985403	0.445997
MSTRG.2278	HzChr04	6848745	6852443	7.6016	-0.267078	7.269	0.0175673	0.0837662	-0.559355	31.6924	6.56238e-05	0.0419771	XP_021189297.1	UPF0184 protein C9orf16 [Helicoverpa armigera]
MSTRG.2279	HzChr04	6852651	6863622	4.98088	0.096886	0.180109	0.677845	0.848698	-0.268108	1.36943	0.261796	0.640496	XP_021189261.1	ras-related protein Rab-14 [Helicoverpa armigera]
MSTRG.2280	HzChr04	6865646	6892572	2.81959	-1.24982	12.2831	0.00360039	0.028245	-0.419602	1.42601	0.252657	0.630637	XP_021189207.1	carnitine O-acetyltransferase isoform X1 [Helicoverpa armigera]
MSTRG.2280	HzChr04	6865646	6892572	2.81959	-1.24982	12.2831	0.00360039	0.028245	-0.419602	1.42601	0.252657	0.630637	XP_021189208.1	carnitine O-acetyltransferase isoform X2 [Helicoverpa armigera]
MSTRG.2280	HzChr04	6865646	6892572	2.81959	-1.24982	12.2831	0.00360039	0.028245	-0.419602	1.42601	0.252657	0.630637	XP_021189209.1	carnitine O-acetyltransferase isoform X3 [Helicoverpa armigera]
MSTRG.2280	HzChr04	6865646	6892572	2.81959	-1.24982	12.2831	0.00360039	0.028245	-0.419602	1.42601	0.252657	0.630637	XP_021198389.1	uncharacterized protein LOC110382209 [Helicoverpa armigera]
MSTRG.2281	HzChr04	6876802	6877234	-0.381676	0.623798	0.0657619	0.802081	0.919783	6.10957	3.12034	0.103469	0.450753
MSTRG.2282	HzChr04	6897240	6899080	4.59009	0.0242478	0.0221279	0.8839	0.961004	-0.0368377	0.051037	0.824581	0.970583
MSTRG.2283	HzChr04	6900866	6935829	3.67342	0.0658143	0.240023	0.631888	0.819242	0.291544	4.7362	0.0474182	0.353876	XP_021189287.1	LOW QUALITY PROTEIN: chromodomain-helicase-DNA-binding protein 7 [Helicoverpa armigera]
MSTRG.2284	HzChr04	6937169	6941395	1.34302	2.62319	2.65945	0.125776	0.306116	-1.79856	1.82425	0.198766	0.569383
MSTRG.2286	HzChr04	6945142	6964928	3.68497	0.106407	0.141224	0.712814	0.868004	-0.0583502	0.0424567	0.839778	0.974554	XP_021189232.1	phosphatidylserine synthase 1 [Helicoverpa armigera]
MSTRG.2287	HzChr04	6958268	7009788	3.02734	-0.242887	0.770984	0.394947	0.630188	-0.265089	0.909185	0.356739	0.729268	XP_021189231.1	golgin subfamily A member 2-like [Helicoverpa armigera]
MSTRG.2287	HzChr04	6958268	7009788	3.02734	-0.242887	0.770984	0.394947	0.630188	-0.265089	0.909185	0.356739	0.729268	XP_021189234.1	N-terminal Xaa-Pro-Lys N-methyltransferase 1-A-like [Helicoverpa armigera]
MSTRG.2287	HzChr04	6958268	7009788	3.02734	-0.242887	0.770984	0.394947	0.630188	-0.265089	0.909185	0.356739	0.729268	XP_021195999.1	uncharacterized protein LOC110380366 [Helicoverpa armigera]
MSTRG.2288	HzChr04	6972169	6972861	7.78031	0.987071	6.50396	0.0234553	0.101807	0.291082	0.574203	0.461471	0.80633
MSTRG.2289	HzChr04	6982828	7001429	3.20633	-0.519634	2.8621	0.113247	0.287329	-0.738469	5.57364	0.0335854	0.312587	XP_021189300.1	transmembrane protein 189 isoform X1 [Helicoverpa armigera]
MSTRG.2289	HzChr04	6982828	7001429	3.20633	-0.519634	2.8621	0.113247	0.287329	-0.738469	5.57364	0.0335854	0.312587	XP_021189302.1	transmembrane protein 189 isoform X2 [Helicoverpa armigera]
MSTRG.2291	HzChr04	7010645	7076028	12.5212	0.208473	1.12291	0.307493	0.543659	-0.0850787	0.187152	0.671984	0.913044	XP_021189278.1	60S ribosomal protein L35 [Helicoverpa armigera]
MSTRG.2293	HzChr04	7029731	7030412	1.25765	2.02765	2.17627	0.162835	0.360882	-0.288081	0.045335	0.834535	0.973322
MSTRG.2296	HzChr04	7040114	7046708	3.69825	-0.0632108	0.145898	0.708305	0.865508	0.198565	1.44024	0.250302	0.628151
MSTRG.2298	HzChr04	7048753	7052947	4.6481	0.104443	0.501888	0.490469	0.713925	-0.272349	3.39816	0.0868524	0.427348
MSTRG.2299	HzChr04	7054539	7067848	4.23953	-0.189077	0.58848	0.455981	0.686221	0.173154	0.48883	0.496109	0.828051
MSTRG.2300	HzChr04	7072251	7073685	7.89684	0.210685	0.856455	0.3707	0.60691	-0.0682024	0.0897768	0.768945	0.949283
MSTRG.2301	HzChr04	7080666	7085165	3.78621	-0.528544	7.59764	0.0156185	0.0777625	-0.111618	0.338384	0.570147	0.86622	XP_021189248.1	programmed cell death protein 10 [Helicoverpa armigera]
MSTRG.2302	HzChr04	7160409	7162524	0.944561	0.207772	0.248018	0.626318	0.815004	-0.389455	0.842457	0.374462	0.743904
MSTRG.2303	HzChr04	7207372	7227150	5.31325	0.0866089	0.229009	0.639754	0.823195	-0.116086	0.410573	0.532178	0.847524	XP_021189239.1	COP9 signalosome complex subunit 9 isoform X1 [Helicoverpa armigera]
MSTRG.2304	HzChr04	7216779	7224852	3.85752	-0.104054	0.468717	0.504917	0.726267	0.217125	2.0385	0.175604	0.541943	XP_021189235.1	transcription factor Dp-1 isoform X1 [Helicoverpa armigera]
MSTRG.2305	HzChr04	7227689	7230289	3.03271	0.564639	11.668	0.00425806	0.0315231	-0.0395721	0.05729	0.814351	0.966855	XP_021189263.1	tRNA-dihydrouridine(20) synthase [NAD(P)+]-like [Helicoverpa armigera]
MSTRG.2306	HzChr04	7229843	7230472	4.16589	-0.257386	2.18208	0.162086	0.360004	-0.0395555	0.0513381	0.824073	0.970401
MSTRG.2307	HzChr04	7231588	7231811	4.0087	1.33779	1.41007	0.25529	0.485812	-0.84587	0.570836	0.462761	0.807262
MSTRG.2308	HzChr04	7238163	7251703	1.34766	-4.75406	15.9643	0.00139048	0.0147044	-0.340317	0.110998	0.744071	0.940794
MSTRG.2309	HzChr04	7270047	7275786	-0.717302	0.339138	0.176125	0.681186	0.850718	1.61136	4.23917	0.0588987	0.381046
MSTRG.2311	HzChr04	7281140	7287340	-0.116836	-8.15596	4.98108	0.0576016	0.186189	6.48699	3.09381	0.118328	0.470156	XP_021189199.1	UPF0598 protein CG30010 [Helicoverpa armigera]
MSTRG.2312	HzChr04	7283194	7284586	4.18557	-0.0752227	0.187208	0.671937	0.845875	-0.224507	1.6584	0.219001	0.593138
MSTRG.2313	HzChr04	7287575	7293775	3.19963	-0.110147	0.359715	0.558386	0.768425	-0.261191	2.0155	0.177899	0.545224	XP_021189195.1	katanin p80 WD40 repeat-containing subunit B1 isoform X1 [Helicoverpa armigera]
MSTRG.2313	HzChr04	7287575	7293775	3.19963	-0.110147	0.359715	0.558386	0.768425	-0.261191	2.0155	0.177899	0.545224	XP_021189196.1	katanin p80 WD40 repeat-containing subunit B1 isoform X2 [Helicoverpa armigera]
MSTRG.2313	HzChr04	7287575	7293775	3.19963	-0.110147	0.359715	0.558386	0.768425	-0.261191	2.0155	0.177899	0.545224	XP_021189197.1	katanin p80 WD40 repeat-containing subunit B1 isoform X3 [Helicoverpa armigera]
MSTRG.2314	HzChr04	7293489	7294867	4.67251	0.970076	13.2056	0.0028039	0.0239004	-0.332885	1.58385	0.229258	0.606263	XP_021189200.1	M-phase phosphoprotein 6 [Helicoverpa armigera]
MSTRG.2315	HzChr04	7295888	7311030	3.97188	0.209296	1.44204	0.250021	0.479636	-0.215249	1.51671	0.238697	0.617845	XP_021189298.1	nucleolar protein 10 [Helicoverpa armigera]
STRG.2061	HzChr04	7312955	7314371	-1.30527	-0.553975	0.202831	0.659441	0.837298	0.267468	0.0444047	0.836183	0.973479	XP_021189298.1	nucleolar protein 10 [Helicoverpa armigera]
STRG.2062	HzChr04	7314607	7315498	0.205876	-0.0530729	0.0112456	0.917073	0.977263	0.247999	0.238246	0.633142	0.894277
STRG.2063	HzChr04	7315904	7316878	0.502785	-0.307029	0.100837	0.755631	0.892516	1.24957	1.58241	0.2295	0.606417	XP_021195997.1	sodium leak channel non-selective protein, partial [Helicoverpa armigera]
STRG.2064	HzChr04	7319480	7321326	-0.973073	-0.0321829	0.00133205	0.971409	0.99597	1.2147	1.85027	0.195563	0.566123	XP_021195997.1	sodium leak channel non-selective protein, partial [Helicoverpa armigera]
STRG.2065	HzChr04	7321590	7321970	-0.478954	0.0203204	0.000107311	0.99191	1	0.492787	0.0619421	0.807784	0.964752	XP_021195997.1	sodium leak channel non-selective protein, partial [Helicoverpa armigera]
STRG.2067	HzChr04	7324623	7325484	-0.541665	0.831769	0.139839	0.715155	0.86971	-1.65434	0.500866	0.493029	0.826425	XP_021195997.1	sodium leak channel non-selective protein, partial [Helicoverpa armigera]
STRG.2069	HzChr04	7327234	7327648	-0.949114	-0.157816	0.00602246	0.939459	0.986845	-0.29185	0.0192822	0.891931	0.993937	XP_021195997.1	sodium leak channel non-selective protein, partial [Helicoverpa armigera]
MSTRG.2318	HzChr04	7332179	7352721	0.885497	-0.559113	0.15392	0.700872	0.862208	0.347455	0.0612382	0.808231	0.964752	XP_021195990.1	WD repeat-containing protein 35 [Helicoverpa armigera]
MSTRG.2318	HzChr04	7332179	7352721	0.885497	-0.559113	0.15392	0.700872	0.862208	0.347455	0.0612382	0.808231	0.964752	XP_021196002.1	WD repeat-containing protein 35-like [Helicoverpa armigera]
MSTRG.2319	HzChr04	7346436	7347378	1.97142	2.3432	0.836151	0.376364	0.611857	-1.62682	0.42784	0.523914	0.842852
MSTRG.2320	HzChr04	7352105	7354626	5.25216	-0.443881	5.41593	0.035714	0.136066	-0.345985	3.28418	0.0917642	0.43442
MSTRG.2321	HzChr04	7355991	7358114	3.60528	0.00177724	6.81056e-05	0.993534	1	-0.038947	0.0325796	0.859386	0.981576
MSTRG.2322	HzChr04	7358099	7383986	3.27521	0.775914	0.6823	0.422993	0.655601	-0.236137	0.0641157	0.803878	0.963287	XP_021195978.1	collagen alpha-3(IV) chain [Helicoverpa armigera]
MSTRG.2323	HzChr04	7383991	7398603	3.6279	0.454013	0.373507	0.551137	0.763734	-0.903261	1.46427	0.246783	0.625278	XP_021196003.1	collagen alpha-1(IV) chain [Helicoverpa armigera]
MSTRG.2325	HzChr04	7405089	7413199	1.93713	-0.597307	4.48849	0.0527723	0.176086	0.488929	3.11177	0.0998474	0.445997
MSTRG.2326	HzChr04	7412606	7418775	-0.528147	-0.782573	0.451486	0.512798	0.731963	2.29694	2.94231	0.108795	0.456485	XP_021196000.1	F-box/SPRY domain-containing protein 1 [Helicoverpa armigera]
MSTRG.2328	HzChr04	7425413	7429416	3.54259	-0.0546125	0.147433	0.706853	0.86454	0.19529	1.88661	0.191493	0.562385
MSTRG.2329	HzChr04	7470680	7487845	4.50184	-0.764514	14.0065	0.00223694	0.0203952	-0.0195347	0.00918178	0.92504	1
MSTRG.2331	HzChr04	7491946	7502874	3.08034	0.069628	0.111733	0.743206	0.885469	0.146667	0.48817	0.496354	0.828051	XP_021195981.1	uncharacterized protein LOC110380351 isoform X1 [Helicoverpa armigera]
MSTRG.2331	HzChr04	7491946	7502874	3.08034	0.069628	0.111733	0.743206	0.885469	0.146667	0.48817	0.496354	0.828051	XP_021195982.1	rho guanine nucleotide exchange factor 7 isoform X2 [Helicoverpa armigera]
MSTRG.2331	HzChr04	7491946	7502874	3.08034	0.069628	0.111733	0.743206	0.885469	0.146667	0.48817	0.496354	0.828051	XP_021195983.1	rho guanine nucleotide exchange factor 7 isoform X3 [Helicoverpa armigera]
MSTRG.2332	HzChr04	7503256	7506088	6.20682	0.0892006	0.280169	0.605003	0.801113	0.38383	5.17529	0.0394204	0.331658	XP_021195994.1	barrier-to-autointegration factor [Helicoverpa armigera]
MSTRG.2333	HzChr04	7507321	7511243	0.777824	0.264825	0.863354	0.368774	0.605141	0.293002	1.0611	0.320685	0.703847
MSTRG.2334	HzChr04	7510604	7514540	1.37148	-0.0981389	0.0662883	0.80062	0.918831	0.358289	0.868623	0.36736	0.738079	XP_021195987.1	ankyrin repeat domain-containing protein 39 [Helicoverpa armigera]
MSTRG.2335	HzChr04	7523750	7529964	1.11245	9.57148	7.27275	0.0283196	0.116228	7.24589	3.9296	0.0843657	0.424649	XP_021198466.1	uncharacterized protein LOC110382252 [Helicoverpa armigera]
MSTRG.2336	HzChr04	7537093	7616948	1.94282	0.536841	3.20717	0.0952731	0.257982	0.318993	1.16319	0.2993	0.681375	XP_021196001.1	trissin receptor-like [Helicoverpa armigera]
MSTRG.2339	HzChr04	7692967	7700768	-0.431981	-0.461459	0.517202	0.484041	0.708178	-0.820729	1.62274	0.223752	0.599986
MSTRG.2340	HzChr04	7706616	7707745	0.620999	-0.152665	0.229132	0.639665	0.823195	-0.795315	6.1459	0.0267329	0.287696
MSTRG.2341	HzChr04	7709687	7718112	4.21866	-0.067194	0.20777	0.655613	0.834969	-0.0268978	0.0331608	0.858152	0.981341	XP_021184039.1	cullin-3-B [Helicoverpa armigera]
STRG.2102	HzChr04	7718486	7718936	-1.0566	-0.383292	0.0425868	0.83955	0.939413	0.412736	0.0491428	0.827842	0.971365	XP_021183998.1	tectonic-1 [Helicoverpa armigera]
MSTRG.2342	HzChr04	7721729	7736819	1.05669	-0.316477	0.992922	0.336185	0.573204	0.491816	2.37335	0.146039	0.507164	XP_021184113.1	serine-protein kinase ATM [Helicoverpa armigera]
MSTRG.2345	HzChr04	7746398	7787279	-0.557564	-1.58466	2.06232	0.173319	0.375703	-2.73645	5.51456	0.0343551	0.316493	XP_021184121.1	uncharacterized protein LOC110371968 [Helicoverpa armigera]
MSTRG.2348	HzChr04	7808348	7882404	0.747506	0.163606	0.0485378	0.828887	0.935131	-0.240945	0.101305	0.755084	0.944584	XP_021184129.1	tensin-2 isoform X3 [Helicoverpa armigera]
MSTRG.2348	HzChr04	7808348	7882404	0.747506	0.163606	0.0485378	0.828887	0.935131	-0.240945	0.101305	0.755084	0.944584	XP_021184130.1	tensin-2 isoform X4 [Helicoverpa armigera]
MSTRG.2348	HzChr04	7808348	7882404	0.747506	0.163606	0.0485378	0.828887	0.935131	-0.240945	0.101305	0.755084	0.944584	XP_021184131.1	tensin isoform X5 [Helicoverpa armigera]
MSTRG.2348	HzChr04	7808348	7882404	0.747506	0.163606	0.0485378	0.828887	0.935131	-0.240945	0.101305	0.755084	0.944584	XP_021184132.1	tensin-2 isoform X6 [Helicoverpa armigera]
MSTRG.2348	HzChr04	7808348	7882404	0.747506	0.163606	0.0485378	0.828887	0.935131	-0.240945	0.101305	0.755084	0.944584	XP_021184134.1	tensin-2 isoform X7 [Helicoverpa armigera]
MSTRG.2348	HzChr04	7808348	7882404	0.747506	0.163606	0.0485378	0.828887	0.935131	-0.240945	0.101305	0.755084	0.944584	XP_021184135.1	tensin-2 isoform X8 [Helicoverpa armigera]
MSTRG.2349	HzChr04	7824728	7864016	5.2709	0.456263	0.143309	0.710833	0.86665	-1.13357	0.857088	0.370627	0.740465	XP_021199718.1	uncharacterized protein LOC110383276 [Helicoverpa armigera]
MSTRG.2350	HzChr04	7882870	7890979	-1.16342	1.13565	0.858219	0.37016	0.606409	-0.562774	0.215124	0.650013	0.902214
MSTRG.2351	HzChr04	7884961	7892820	-2.11673	5.34437	2.64699	0.144094	0.334381	-4.98636	2.33967	0.166325	0.533656
MSTRG.2352	HzChr04	7893506	7893909	-0.835672	5.75172	2.69205	0.141177	0.329521	-7.30811	3.97999	0.0827521	0.423019
MSTRG.2353	HzChr04	7895675	7898376	-0.55224	-0.249768	0.0273764	0.871008	0.954333	1.623	1.09916	0.312653	0.695351
MSTRG.2354	HzChr04	7898432	7899560	-0.460049	1.64911	0.789547	0.392206	0.628159	0.434359	0.0578394	0.814122	0.966855
MSTRG.2356	HzChr04	7905470	7907411	-0.695581	0.3231	0.100312	0.756196	0.892683	0.201325	0.0401009	0.844205	0.976371
MSTRG.2358	HzChr04	7917068	7921153	0.590445	1.78651	28.9953	0.000101212	0.00257842	0.186081	0.317651	0.582068	0.873432	XP_021184123.1	peptidyl-prolyl cis-trans isomerase B-like [Helicoverpa armigera]
MSTRG.2359	HzChr04	7921246	7922074	5.64205	-0.473231	7.24912	0.017694	0.084203	0.100578	0.328811	0.575588	0.870535
MSTRG.2361	HzChr04	7978572	7988755	4.70192	-0.0332923	0.0146592	0.905394	0.972672	-0.847912	9.19659	0.0091651	0.203121	XP_021184021.1	diacylglycerol O-acyltransferase 1 isoform X1 [Helicoverpa armigera]
MSTRG.2362	HzChr04	7989422	7991833	6.29547	-0.398247	4.2508	0.0585948	0.188507	-0.504712	6.80183	0.0208461	0.267195
MSTRG.2364	HzChr04	7992916	7999859	-0.639333	-1.59739	1.8627	0.194234	0.405549	-0.21102	0.0334544	0.857542	0.981128	XP_021184094.1	mediator of RNA polymerase II transcription subunit 11 [Helicoverpa armigera]
MSTRG.2365	HzChr04	8001487	8003166	0.801062	-2.22982	35.4892	3.72295e-05	0.00137909	-0.836636	5.3705	0.0363812	0.322407
MSTRG.2366	HzChr04	8003107	8005088	-1.34521	-0.857189	0.278999	0.605788	0.801209	-1.4102	0.715652	0.412071	0.773781	XP_021200997.1	uncharacterized protein LOC110384175 [Helicoverpa armigera]
MSTRG.2367	HzChr04	8005933	8008896	10.5618	-0.0663807	0.124874	0.729149	0.87751	-0.294709	2.45719	0.139631	0.499289
MSTRG.2368	HzChr04	8010832	8012797	5.01834	0.116972	0.38743	0.543804	0.758191	-0.362592	3.7241	0.074454	0.406955
MSTRG.2369	HzChr04	8013219	8016317	2.19315	-1.16406	1.17187	0.297762	0.531967	-1.04869	0.953952	0.345702	0.721022	XP_021184034.1	uncharacterized protein LOC110371912 [Helicoverpa armigera]
MSTRG.2373	HzChr04	8267974	8271626	6.61412	0.00665695	0.00141389	0.970544	0.99597	-0.0581527	0.107831	0.747557	0.94249
MSTRG.2374	HzChr04	8274867	8290942	3.81958	-1.08503	44.5282	1.13678e-05	0.000629843	-0.333079	4.24703	0.0586931	0.380961	XP_021184116.1	geranylgeranyl transferase type-2 subunit alpha [Helicoverpa armigera]
MSTRG.2375	HzChr04	8294038	8295706	3.41195	0.12149	0.498469	0.491924	0.71508	-0.292217	2.8395	0.114447	0.464706
STRG.2135	HzChr04	8323047	8323782	0.630893	0.399177	0.13558	0.718361	0.871614	1.12531	1.04886	0.32357	0.705649
MSTRG.2376	HzChr04	8553127	8559502	0.468835	-1.13044	2.17257	0.163137	0.361366	0.579093	0.575903	0.460804	0.805709	XP_021183976.1	neural-cadherin isoform X3 [Helicoverpa armigera]
MSTRG.2377	HzChr04	8585275	8593042	1.47487	0.114869	0.336269	0.57134	0.778077	-0.0385399	0.0376894	0.848898	0.977661	XP_021184002.1	LOW QUALITY PROTEIN: proline-rich protein 36 [Helicoverpa armigera]
MSTRG.2378	HzChr04	8593999	8595800	6.29588	-0.0793352	0.221009	0.645617	0.827128	0.192945	1.30538	0.272672	0.651049
MSTRG.2379	HzChr04	8604196	8606072	-0.322768	0	0	1	1	0	0	1	1
MSTRG.2380	HzChr04	8629047	8629438	5.58622	2.30868	2.36824	0.146672	0.338003	-1.98614	1.79684	0.201971	0.572561
MSTRG.2381	HzChr04	8679137	8680168	2.28161	2.087	13.105	0.00288958	0.0244206	1.02062	3.46996	0.0841436	0.424585
MSTRG.2382	HzChr04	8682636	8684444	4.65209	0.181504	0.853226	0.371514	0.60786	-0.0181841	0.00855489	0.927636	1
MSTRG.2383	HzChr04	8687508	8691128	3.63965	-0.199699	1.3097	0.271915	0.504342	0.0248428	0.0201331	0.889217	0.993511
MSTRG.2384	HzChr04	8690883	8693144	0.701394	-0.055023	0.0169702	0.898233	0.969093	1.11288	6.82662	0.0206551	0.266196	XP_021183993.1	ras-related protein Rab-30 [Helicoverpa armigera]
MSTRG.2385	HzChr04	8695403	8699813	0.839905	0.504876	3.70881	0.0749864	0.221508	0.57667	4.85718	0.0450377	0.344799
MSTRG.2386	HzChr04	8699865	8718763	4.34635	-0.300381	0.586971	0.456633	0.686883	-1.35551	10.9553	0.00531472	0.16911	XP_021184028.1	uncharacterized protein LOC110371908 [Helicoverpa armigera]
MSTRG.2387	HzChr04	8719237	8749050	2.5	0.0136112	0.00114464	0.973499	0.996558	0.627546	2.51192	0.135791	0.494116	XP_021183980.1	uncharacterized protein LOC110371881 isoform X1 [Helicoverpa armigera]
MSTRG.2387	HzChr04	8719237	8749050	2.5	0.0136112	0.00114464	0.973499	0.996558	0.627546	2.51192	0.135791	0.494116	XP_021183981.1	uncharacterized protein LOC110371881 isoform X2 [Helicoverpa armigera]
MSTRG.2388	HzChr04	8720416	8750575	3.88637	0.26104	3.06387	0.102244	0.269649	0.209481	1.96798	0.182764	0.551055	XP_021183984.1	COP9 signalosome complex subunit 8 [Helicoverpa armigera]
MSTRG.2389	HzChr04	8752798	8753486	1.61621	-0.303666	0.310114	0.586622	0.788876	0.631688	1.31657	0.270914	0.649181
MSTRG.2392	HzChr04	8864703	8997190	9.33145	-0.650576	4.34288	0.0564565	0.183909	-0.0983527	0.100103	0.756491	0.945158	XP_021184009.1	40S ribosomal protein S18 [Helicoverpa armigera]
MSTRG.2392	HzChr04	8864703	8997190	9.33145	-0.650576	4.34288	0.0564565	0.183909	-0.0983527	0.100103	0.756491	0.945158	XP_021184074.1	trifunctional enzyme subunit alpha, mitochondrial [Helicoverpa armigera]
MSTRG.2392	HzChr04	8864703	8997190	9.33145	-0.650576	4.34288	0.0564565	0.183909	-0.0983527	0.100103	0.756491	0.945158	XP_021184103.1	aromatic-L-amino-acid decarboxylase [Helicoverpa armigera]
MSTRG.2393	HzChr04	8885422	8888405	2.24754	-0.093123	0.202985	0.659321	0.837298	0.0411854	0.0394243	0.845507	0.976656
MSTRG.2394	HzChr04	8909162	8911992	1.77647	0.156136	0.175061	0.682093	0.850811	1.02674	7.33969	0.0171254	0.248913	XP_021184064.1	BTB/PO Zdomain-containing protein 6-A-like [Helicoverpa armigera]
MSTRG.2396	HzChr04	8946663	8948459	2.32599	0.0756453	0.087908	0.77127	0.902225	0.0996114	0.151603	0.702952	0.923995
MSTRG.2398	HzChr04	8958436	8987765	4.55578	0.180261	0.55635	0.468306	0.696442	0.458244	3.6204	0.078244	0.413776	XP_021183986.1	junctophilin-1 isoform X1 [Helicoverpa armigera]
MSTRG.2400	HzChr04	8992417	8993587	-0.00892742	-0.226925	0.0345706	0.855232	0.947156	-0.898148	0.521125	0.482541	0.819297
MSTRG.2401	HzChr04	8992974	8996435	3.75619	-0.307812	1.00885	0.332625	0.570098	-0.0554135	0.0329472	0.858628	0.98148	XP_021184009.1	40S ribosomal protein S18 [Helicoverpa armigera]
MSTRG.2402	HzChr04	8997774	9008947	4.52477	-0.474053	10.4448	0.00612574	0.0402128	-0.0767448	0.273904	0.609029	0.883759	XP_021184005.1	importin subunit beta-1 isoform X3 [Helicoverpa armigera]
MSTRG.2403	HzChr04	9010598	9015824	7.64056	-0.17957	1.27867	0.277421	0.510396	-0.0754567	0.225843	0.642059	0.898079
MSTRG.2404	HzChr04	9016870	9018954	5.24262	2.3363	33.4839	5.20014e-05	0.00168989	-0.120115	0.0972208	0.7599	0.945772	XP_021184082.1	39S ribosomal protein L15, mitochondrial [Helicoverpa armigera]
MSTRG.2405	HzChr04	9019790	9024484	3.35717	0.309125	3.54811	0.0808635	0.231897	-0.00051153	9.72656e-06	0.997556	1	XP_021184095.1	conserved oligomeric Golgi complex subunit 6 [Helicoverpa armigera]
MSTRG.2406	HzChr04	9025029	9027178	8.13145	-0.173312	1.65794	0.219062	0.439653	-0.65974	23.8189	0.000253342	0.0656917
MSTRG.2407	HzChr04	9027352	9032847	3.6801	0.11679	0.575743	0.460753	0.690684	0.0927347	0.360572	0.557924	0.859755	XP_021184097.1	probable tRNA(His) guanylyltransferase [Helicoverpa armigera]
MSTRG.2408	HzChr04	9032947	9033697	4.73732	0.342253	3.16868	0.0970873	0.260858	-0.136609	0.503414	0.489822	0.824751
MSTRG.2409	HzChr04	9034056	9043054	3.00396	-0.0182476	0.0164998	0.899645	0.969478	0.0684018	0.230863	0.638414	0.896279
MSTRG.2411	HzChr04	9051016	9053450	1.08012	0.0640096	0.012543	0.91245	0.975341	-0.568211	0.992977	0.336278	0.715565	XP_021184087.1	E3 ubiquitin-protein ligase MIB1 [Helicoverpa armigera]
MSTRG.2412	HzChr04	9053976	9165348	-1.02351	0.497606	0.313997	0.584223	0.787062	0.572616	0.419353	0.527889	0.845234
MSTRG.2416	HzChr04	9143073	9191782	3.31731	0.613295	7.86272	0.014228	0.0728251	0.117766	0.291785	0.597691	0.878679	XP_021184100.1	neuroguidin [Helicoverpa armigera]
MSTRG.2417	HzChr04	9166132	9170288	-0.340789	-0.0377935	0.00433475	0.948451	0.989703	0.475937	0.68696	0.421308	0.779766
MSTRG.2418	HzChr04	9171349	9178028	0.534767	0.60266	2.2958	0.152295	0.345987	1.78556	17.6297	0.000920117	0.102859	XP_021184037.1	CDK5 and ABL1 enzyme substrate 2 isoform X1 [Helicoverpa armigera]
MSTRG.2419	HzChr04	9192719	9197472	3.36284	-0.398021	6.44629	0.0238244	0.102995	0.533944	11.5056	0.00446357	0.160305
MSTRG.2420	HzChr04	9195959	9330634	6.27692	0.222783	2.88311	0.111942	0.285246	0.0992174	0.571828	0.462251	0.806845	XP_021183985.1	eukaryotic initiation factor 4A [Helicoverpa armigera]
MSTRG.2420	HzChr04	9195959	9330634	6.27692	0.222783	2.88311	0.111942	0.285246	0.0992174	0.571828	0.462251	0.806845	XP_021184086.1	activating signal cointegrator 1 complex subunit 1 [Helicoverpa armigera]
MSTRG.2421	HzChr04	9198422	9199835	3.59914	-0.264706	3.73853	0.073956	0.219693	0.0408589	0.0890384	0.76985	0.949496	XP_021184066.1	carbonyl reductase [NADPH] 1-like [Helicoverpa armigera]
MSTRG.2422	HzChr04	9313274	9319938	1.86655	0.192825	0.0489774	0.828127	0.934785	-2.58904	7.36742	0.0170811	0.248828	XP_021184052.1	uncharacterized protein LOC110371921 isoform X1 [Helicoverpa armigera]
MSTRG.2423	HzChr04	9331313	9336150	9.03231	-0.296914	5.06446	0.0412785	0.149449	-0.00884464	0.00450169	0.947469	1
MSTRG.2424	HzChr04	9336179	9374770	1.39055	-0.0527556	0.0066121	0.936371	0.985796	-0.252739	0.153338	0.701408	0.923599	XP_021184125.1	uncharacterized protein LOC110371972, partial [Helicoverpa armigera]
MSTRG.2427	HzChr04	9414706	9476843	-0.830584	-0.108161	0.0033647	0.954584	0.992182	-0.0497007	0.000721977	0.978952	1
MSTRG.2428	HzChr04	9433769	9454524	-0.680521	-0.416566	0.153495	0.701202	0.862293	0.251671	0.0536964	0.820153	0.968806
MSTRG.2430	HzChr04	9489824	9503997	2.08957	-0.450027	1.94794	0.184866	0.39176	0.237544	0.556688	0.468121	0.811172	XP_021191322.1	uncharacterized protein LOC110376979 isoform X1 [Helicoverpa armigera]
MSTRG.2431	HzChr04	9504319	9507417	3.72379	-0.23615	1.9272	0.187074	0.394825	0.191197	1.25925	0.280943	0.662138
MSTRG.2432	HzChr04	9507541	9513252	5.55794	-0.100942	0.541032	0.474325	0.700971	0.177714	1.67187	0.217241	0.591466
MSTRG.2433	HzChr04	9514134	9515529	3.74312	0.676092	20.7844	0.000462412	0.00700371	0.389296	6.93645	0.0198333	0.261054
MSTRG.2434	HzChr04	9515633	9518004	2.41319	0.332727	3.90104	0.0686129	0.209201	0.287301	2.90772	0.110558	0.458071
MSTRG.2435	HzChr04	9518098	9519923	3.68174	0.143418	1.27609	0.277885	0.510959	-0.185236	2.11011	0.168691	0.536231
MSTRG.2436	HzChr04	9549468	9549809	7.11386	-0.0995263	0.166637	0.689432	0.854149	0.322167	1.73895	0.208912	0.580432
MSTRG.2437	HzChr04	9549848	9552189	7.14159	-0.000210114	2.23465e-06	0.998829	1	-0.101661	0.521936	0.482084	0.81906	XP_021191294.1	ER membrane protein complex subunit 4 [Helicoverpa armigera]
MSTRG.2438	HzChr04	9553152	9564110	3.14842	-1.01274	9.28865	0.00887162	0.0521872	-0.519015	2.44936	0.140371	0.499289
MSTRG.2439	HzChr04	9571201	9581677	1.13702	0.55551	0.639803	0.437476	0.670514	-0.226911	0.108542	0.746809	0.942106	XP_021191292.1	large neutral amino acids transporter small subunit 1 [Helicoverpa armigera]
MSTRG.2440	HzChr04	9582664	9585178	5.52224	0.376462	7.35644	0.0170225	0.0822881	-0.139526	1.01017	0.332166	0.71253
MSTRG.2441	HzChr04	9585547	9587778	5.26519	-0.106847	0.279509	0.605425	0.801197	-0.28859	2.02664	0.176783	0.543392
MSTRG.2442	HzChr04	9587787	9590203	-0.424802	-6.85305	2.84322	0.123744	0.303205	8.12239	3.60419	0.08789	0.428622	XP_021191295.1	homeobox protein Mohawk [Helicoverpa armigera]
MSTRG.2443	HzChr04	9591614	9642097	2.40823	1.47999	29.2623	9.68411e-05	0.00251612	0.38245	2.03441	0.176009	0.542801	XP_021190544.1	uncharacterized protein LOC110376405, partial [Helicoverpa armigera]
MSTRG.2443	HzChr04	9591614	9642097	2.40823	1.47999	29.2623	9.68411e-05	0.00251612	0.38245	2.03441	0.176009	0.542801	XP_021191273.1	large neutral amino acids transporter small subunit 2 [Helicoverpa armigera]
STRG.2203	HzChr04	9655326	9655550	1.6858	0.0776052	0.00475829	0.946005	0.98887	0.705289	0.379	0.548263	0.855438
MSTRG.2445	HzChr04	9656108	9657345	-0.952992	-2.36315	0.893322	0.367629	0.603789	1.81186	0.529723	0.483998	0.820159
MSTRG.2446	HzChr04	9658617	9663069	0.659111	-0.602911	3.66263	0.0766213	0.224648	0.5804	3.49976	0.0827388	0.423019
MSTRG.2449	HzChr04	9879374	9896103	1.3685	-0.0212154	0.00226912	0.96269	0.994074	0.527308	1.44845	0.249021	0.628151	XP_021191275.1	annulin isoform X2 [Helicoverpa armigera]
STRG.2208	HzChr04	9902790	9903123	-1.70897	0	0	1	1	0.980762	0.161108	0.699108	0.922961	XP_021191310.1	hemocyte protein-glutamine gamma-glutamyltransferase-like [Helicoverpa armigera]
MSTRG.2450	HzChr04	9906477	9909418	1.85072	1.31566	14.0089	0.00223554	0.0203952	0.594246	2.90769	0.11056	0.458071	XP_021191311.1	transmembrane protein 231 [Helicoverpa armigera]
MSTRG.2451	HzChr04	9908234	9911248	5.85283	0.202477	1.1119	0.309785	0.545924	-0.362677	3.54976	0.0808005	0.41936	XP_021191317.1	mitochondrial import inner membrane translocase subunit Tim21 [Helicoverpa armigera]
MSTRG.2452	HzChr04	9911216	9918657	-0.472822	1.15137	1.20004	0.292128	0.52572	-0.70327	0.4391	0.518509	0.84054	XP_021191312.1	PQ-loop repeat-containing protein 1 isoform X1 [Helicoverpa armigera]
MSTRG.2452	HzChr04	9911216	9918657	-0.472822	1.15137	1.20004	0.292128	0.52572	-0.70327	0.4391	0.518509	0.84054	XP_021191315.1	PQ-loop repeat-containing protein 1 isoform X3 [Helicoverpa armigera]
STRG.2212	HzChr04	9935679	9942987	-0.588643	1.82971	1.21735	0.288946	0.522807	0.205486	0.0167884	0.898796	0.995633	XP_021191269.1	ubiquitin-conjugating enzyme E2Q-like protein CG4502 [Helicoverpa armigera]
STRG.2213	HzChr04	9943286	9943865	-0.0146936	1.54801	0.733985	0.406378	0.640415	0.684982	0.157957	0.697187	0.922961
MSTRG.2453	HzChr04	9944543	9951160	7.32808	0.260621	3.80637	0.0716674	0.214737	-0.369036	7.61863	0.0155028	0.241928	XP_021191271.1	NEDD8 [Helicoverpa armigera]
MSTRG.2453	HzChr04	9944543	9951160	7.32808	0.260621	3.80637	0.0716674	0.214737	-0.369036	7.61863	0.0155028	0.241928	XP_021201193.1	calponin homology domain-containing protein DDB_G0272472-like [Helicoverpa armigera]
MSTRG.2454	HzChr04	9946141	9954814	1.2764	1.37469	18.9531	0.000683535	0.00893094	-0.206438	0.443725	0.516314	0.840031	XP_021191260.1	transport and Golgi organization protein 6 homolog [Helicoverpa armigera]
MSTRG.2457	HzChr04	9971280	9972417	0.116744	0.991143	0.937805	0.349683	0.586499	0.40482	0.162669	0.692955	0.921358
MSTRG.2458	HzChr04	9973018	9974634	3.88005	0.27289	1.49798	0.241472	0.468916	-0.0169704	0.00576748	0.940554	1
MSTRG.2459	HzChr04	9974867	9980649	-0.90722	0.396413	0.0389695	0.846417	0.942281	-0.949157	0.214944	0.650223	0.902214	XP_021191305.1	uncharacterized protein LOC110376966 [Helicoverpa armigera]
MSTRG.2460	HzChr04	9980197	9984795	4.7641	-0.0757406	0.154716	0.70008	0.861478	-0.12756	0.437972	0.519004	0.840582	XP_021191307.1	growth hormone-inducible transmembrane protein-like [Helicoverpa armigera]
MSTRG.2461	HzChr04	9984908	9988948	5.60947	1.52516	36.8282	3.19519e-05	0.00124029	-0.0553024	0.0506559	0.825253	0.970644	XP_021191306.1	nucleolar complex protein 2 homolog [Helicoverpa armigera]
MSTRG.2463	HzChr04	9989884	9990366	-1.36701	0.0851264	0.00152544	0.969506	0.995755	-2.07526	0.87846	0.367639	0.738411
STRG.2227	HzChr04	10003412	10003772	-1.34822	-6.2495	3.92029	0.0718105	0.215	-1.08786	0.201843	0.661477	0.907518	XP_021191308.1	hydrocephalus-inducing protein homolog [Helicoverpa armigera]
MSTRG.2467	HzChr04	10023662	10037902	1.97138	-0.0334218	0.0146126	0.905527	0.972672	0.515653	3.58077	0.0796255	0.416804	XP_021191299.1	uncharacterized protein LOC110376965 isoform X1 [Helicoverpa armigera]
MSTRG.2467	HzChr04	10023662	10037902	1.97138	-0.0334218	0.0146126	0.905527	0.972672	0.515653	3.58077	0.0796255	0.416804	XP_021191300.1	uncharacterized protein LOC110376965 isoform X2 [Helicoverpa armigera]
MSTRG.2467	HzChr04	10023662	10037902	1.97138	-0.0334218	0.0146126	0.905527	0.972672	0.515653	3.58077	0.0796255	0.416804	XP_021191301.1	uncharacterized protein LOC110376965 isoform X3 [Helicoverpa armigera]
MSTRG.2467	HzChr04	10023662	10037902	1.97138	-0.0334218	0.0146126	0.905527	0.972672	0.515653	3.58077	0.0796255	0.416804	XP_021191302.1	uncharacterized protein LOC110376965 isoform X4 [Helicoverpa armigera]
MSTRG.2467	HzChr04	10023662	10037902	1.97138	-0.0334218	0.0146126	0.905527	0.972672	0.515653	3.58077	0.0796255	0.416804	XP_021191303.1	uncharacterized protein LOC110376965 isoform X5 [Helicoverpa armigera]
MSTRG.2468	HzChr04	10037615	10040447	4.13451	0.52731	3.96473	0.0667623	0.205599	-0.289957	1.20245	0.291708	0.673723	XP_021191259.1	pre-mRNA-splicing factor CWC25 homolog [Helicoverpa armigera]
MSTRG.2470	HzChr04	10043996	10044212	2.55479	10.3577	14.3685	0.00270556	0.0232301	-0.57095	0.140742	0.714282	0.929031
MSTRG.2471	HzChr04	10048204	10050806	2.82479	-0.620675	3.61844	0.0782793	0.227605	0.568452	3.01484	0.104826	0.452295	XP_021191291.1	Krueppel homolog 1-like [Helicoverpa armigera]
MSTRG.2472	HzChr04	10054248	10057249	6.08486	0.677896	16.1391	0.00130742	0.0141138	0.19501	1.34634	0.265603	0.644174	XP_021191257.1	small nuclear ribonucleoprotein-associated protein B [Helicoverpa armigera]
MSTRG.2474	HzChr04	10057311	10063586	1.38703	-0.0966795	0.126843	0.727115	0.876129	0.478713	3.17787	0.0966505	0.44319
MSTRG.2475	HzChr04	10064065	10067896	5.04317	-0.0949559	0.335539	0.571753	0.778162	-0.028464	0.0300708	0.864848	0.984525
MSTRG.2476	HzChr04	10068816	10072457	3.32448	-0.154483	0.95785	0.344579	0.581249	0.0699187	0.196966	0.664062	0.909105
MSTRG.2477	HzChr04	10073946	10082891	2.27344	0.00934581	0.00294729	0.957483	0.993223	0.0430782	0.0624374	0.806366	0.964412
MSTRG.2478	HzChr04	10083004	10085612	3.15522	0.0180254	0.00488705	0.94527	0.988432	0.120036	0.216197	0.649207	0.902214
MSTRG.2479	HzChr04	10085958	10088741	1.97534	-1.25704	7.91211	0.0140533	0.0722732	-0.171342	0.147203	0.707106	0.925801
MSTRG.2480	HzChr04	10088826	10098903	2.8018	-0.0350622	0.0182667	0.894442	0.966417	0.703039	7.25999	0.0176246	0.251584	XP_021185896.1	leucine-rich repeat extensin-like protein 5, partial [Helicoverpa armigera]
MSTRG.2481	HzChr04	10089210	10091608	2.03727	1.21356	14.3572	0.00204169	0.0190985	0.819746	6.62652	0.0222567	0.272225
MSTRG.2482	HzChr04	10098371	10103949	4.57651	-0.622613	13.7358	0.00240251	0.0213493	-0.363056	4.67484	0.0486823	0.357467	XP_021185866.1	39S ribosomal protein L3, mitochondrial [Helicoverpa armigera]
MSTRG.2483	HzChr04	10104917	10108519	2.64999	0.120965	0.183703	0.674826	0.847082	0.186952	0.442433	0.516916	0.840031	XP_021185982.1	KDEL motif-containing protein 1-like [Helicoverpa armigera]
MSTRG.2484	HzChr04	10108679	10123716	-0.6993	1.09952	1.28997	0.275398	0.509058	0.826776	0.721776	0.410062	0.77218	XP_021185971.1	ubiquitin carboxyl-terminal hydrolase CYLD isoform X2 [Helicoverpa armigera]
MSTRG.2484	HzChr04	10108679	10123716	-0.6993	1.09952	1.28997	0.275398	0.509058	0.826776	0.721776	0.410062	0.77218	XP_021185974.1	ubiquitin carboxyl-terminal hydrolase CYLD isoform X4 [Helicoverpa armigera]
MSTRG.2484	HzChr04	10108679	10123716	-0.6993	1.09952	1.28997	0.275398	0.509058	0.826776	0.721776	0.410062	0.77218	XP_021185979.1	ubiquitin carboxyl-terminal hydrolase CYLD isoform X6 [Helicoverpa armigera]
MSTRG.2486	HzChr04	10132196	10133030	-0.205406	5.11702	10.3744	0.00759871	0.0468683	0.462062	0.136299	0.718608	0.931396
MSTRG.2487	HzChr04	10140172	10142484	7.20159	-0.0998398	0.47128	0.503774	0.725392	-0.50624	12.0155	0.00385389	0.151427
MSTRG.2488	HzChr04	10142651	10151571	7.2623	0.487069	4.24372	0.0589088	0.188907	0.266918	1.27765	0.277726	0.657795	XP_021185893.1	proteasome subunit beta type-7 [Helicoverpa armigera]
MSTRG.2489	HzChr04	10144762	10151255	0.0531295	0.278491	0.186784	0.672285	0.846202	1.13083	3.01886	0.10456	0.452295	XP_021185891.1	protein O-mannosyltransferase 1 isoform X1 [Helicoverpa armigera]
MSTRG.2489	HzChr04	10144762	10151255	0.0531295	0.278491	0.186784	0.672285	0.846202	1.13083	3.01886	0.10456	0.452295	XP_021185892.1	protein O-mannosyltransferase 1 isoform X2 [Helicoverpa armigera]
MSTRG.2491	HzChr04	10152441	10161029	-0.0339121	8.49074	16.854	0.00154763	0.0158127	1.20092	0.778654	0.395387	0.760827	XP_021182637.1	THAP domain-containing protein 1-like isoform X1 [Helicoverpa armigera]
MSTRG.2492	HzChr04	10156506	10174260	4.17057	0.340144	6.36325	0.0245897	0.105112	-0.0804098	0.355902	0.560453	0.861117	XP_021185981.1	mRNA cap guanine-N7 methyltransferase [Helicoverpa armigera]
MSTRG.2493	HzChr04	10161370	10165878	1.04289	-0.263602	0.706515	0.414933	0.648771	0.317974	1.02921	0.327806	0.708328	XP_021186016.1	ATPase WRNIP1-like [Helicoverpa armigera]
MSTRG.2494	HzChr04	10165887	10171652	5.049	-0.299896	0.47722	0.501259	0.723699	0.384721	0.78319	0.391484	0.758221	XP_021186014.1	DNA topoisomerase I, mitochondrial isoform X1 [Helicoverpa armigera]
MSTRG.2495	HzChr04	10177224	10204257	-0.349355	0.379511	0.203533	0.658894	0.837095	-0.59946	0.505196	0.489068	0.824119	XP_021185842.1	ral guanine nucleotide dissociation stimulator isoform X7 [Helicoverpa armigera]
MSTRG.2499	HzChr04	10232746	10266222	-0.332935	-0.379119	0.0205415	0.889735	0.9645	-8.11429	4.06223	0.0802038	0.417775
MSTRG.2500	HzChr04	10243418	10244907	-1.93333	0	0	1	1	-4.88743	2.66793	0.142729	0.503345
MSTRG.2502	HzChr04	10299167	10301715	2.47795	0.040136	0.00388594	0.951197	0.991151	-1.30119	3.86401	0.0700039	0.399873
MSTRG.2503	HzChr04	10302672	10312289	0.824483	0.32897	1.24526	0.283519	0.516971	-0.141674	0.231546	0.637922	0.896062
MSTRG.2504	HzChr04	10313334	10318540	0.502003	0.305812	0.992434	0.3363	0.573249	-0.237439	0.597125	0.452713	0.801724
MSTRG.2505	HzChr04	10341347	10344447	4.91619	-0.0135248	0.0123019	0.913282	0.975907	-0.468997	14.6671	0.00188531	0.124986
MSTRG.2506	HzChr04	10343982	10347906	1.03582	-0.269646	1.14951	0.302049	0.537191	0.274802	1.18544	0.294904	0.676788
MSTRG.2507	HzChr04	10348010	10352218	3.5661	-0.0478978	0.105422	0.750288	0.889085	0.101098	0.466624	0.505854	0.833187
MSTRG.2508	HzChr04	10350698	10378306	2.12247	-0.565731	3.42264	0.0858393	0.241307	0.414679	1.85591	0.194925	0.565488	XP_021185931.1	piezo-type mechanosensitive ion channel component isoform X4 [Helicoverpa armigera]
MSTRG.2508	HzChr04	10350698	10378306	2.12247	-0.565731	3.42264	0.0858393	0.241307	0.414679	1.85591	0.194925	0.565488	XP_021185935.1	piezo-type mechanosensitive ion channel component isoform X7 [Helicoverpa armigera]
MSTRG.2508	HzChr04	10350698	10378306	2.12247	-0.565731	3.42264	0.0858393	0.241307	0.414679	1.85591	0.194925	0.565488	XP_021185936.1	piezo-type mechanosensitive ion channel component isoform X8 [Helicoverpa armigera]
MSTRG.2509	HzChr04	10362092	10369304	-1.26778	-1.14039	0.288423	0.599875	0.797986	0.334157	0.025536	0.875378	0.988551
MSTRG.2510	HzChr04	10380749	10381086	-0.269731	-1.5777	0.479888	0.500085	0.722487	-0.214458	0.00851825	0.927804	1
MSTRG.2511	HzChr04	10381148	10392346	-0.764253	-0.228794	0.0561424	0.816182	0.927335	0.279991	0.0820178	0.778837	0.954347
MSTRG.2512	HzChr04	10394659	10408005	3.14514	0.3597	2.34925	0.147949	0.339978	0.706631	9.11053	0.00933727	0.204931	XP_021185872.1	eukaryotic translation initiation factor 4E-binding protein Mextli isoform X3 [Helicoverpa armigera]
MSTRG.2513	HzChr04	10407999	10468478	-0.155881	0.10118	0.0364509	0.851368	0.944673	0.559532	1.09005	0.314409	0.697512	XP_021185869.1	mitoguardin [Helicoverpa armigera]
MSTRG.2515	HzChr04	10415888	10416563	0.10722	-1.08596	6.65798	0.0219956	0.0975282	1.24764	8.81299	0.0102978	0.211922
MSTRG.2516	HzChr04	10416892	10417241	-0.677154	0.568364	0.0771679	0.786039	0.910642	1.44114	0.4687	0.506971	0.833933
MSTRG.2517	HzChr04	10419532	10454670	0.909455	0.526266	0.1668	0.689304	0.854149	0.950196	0.568454	0.463677	0.807738	XP_021185877.1	protein unzipped [Helicoverpa armigera]
MSTRG.2518	HzChr04	10468765	10471591	1.77988	0.0528175	0.02306	0.881499	0.959825	0.085245	0.0604979	0.809332	0.96505	XP_021185984.1	F-box only protein 42 [Helicoverpa armigera]
MSTRG.2519	HzChr04	10471538	10474740	3.60785	0.692404	3.76784	0.0731735	0.217959	0.605199	2.87426	0.112675	0.460738
MSTRG.2520	HzChr04	10475829	10481013	4.66329	0.225558	4.7909	0.0463241	0.160983	0.134571	1.71008	0.212346	0.583848	XP_021185946.1	zinc finger CCCH domain-containing protein 13-like isoform X1 [Helicoverpa armigera]
MSTRG.2521	HzChr04	10480672	10483253	4.27237	-0.265195	1.54963	0.23392	0.459372	0.0475769	0.0496109	0.827005	0.971256
MSTRG.2522	HzChr04	10484293	10496928	1.78337	-0.922723	5.82244	0.0303403	0.122124	-0.364804	0.939334	0.349134	0.723548
MSTRG.2523	HzChr04	10499772	10500095	-1.66121	0.0543432	0.000435744	0.983699	1	5.03763	2.13813	0.170111	0.536764
MSTRG.2524	HzChr04	10500410	10500828	-0.993895	-0.509914	0.0847146	0.775381	0.905007	0.38051	0.0456991	0.833883	0.973322
MSTRG.2525	HzChr04	10506194	10531113	2.4624	4.42876	10.6689	0.00579022	0.0387967	0.483508	0.170295	0.686256	0.9193	XP_021185845.1	monocarboxylate transporter 12 [Helicoverpa armigera]
MSTRG.2526	HzChr04	10585588	10586203	-1.2995	-1.10979	0.392214	0.541433	0.756104	-0.766631	0.197869	0.663393	0.908417
MSTRG.2528	HzChr04	10625448	10627708	3.18028	-2.3209	13.9793	0.00229031	0.0206495	0.872499	2.12243	0.167765	0.535136
MSTRG.2529	HzChr04	10662863	10664968	3.79231	-0.30245	1.96561	0.183011	0.389255	-0.285321	1.7548	0.206798	0.578072	XP_021185943.1	uncharacterized protein LOC110373115 [Helicoverpa armigera]
MSTRG.2530	HzChr04	10665174	10667411	1.7905	-0.0173434	0.0119993	0.914673	0.976419	0.00979065	0.00380339	0.973725	1
MSTRG.2531	HzChr04	10666989	10669100	7.28733	0.413227	4.33888	0.0563524	0.183709	-0.175185	0.782809	0.391442	0.758221	XP_021185912.1	coiled-coil domain-containing protein 43 [Helicoverpa armigera]
MSTRG.2532	HzChr04	10669606	10671312	8.32602	-0.133623	1.47382	0.245117	0.473344	-0.0156785	0.0202972	0.88877	0.993362
MSTRG.2533	HzChr04	10673281	10684050	2.35427	1.21824	8.63805	0.0109775	0.0604858	0.0927017	0.0510032	0.824659	0.970583	XP_021185941.1	protein FAN-like [Helicoverpa armigera]
MSTRG.2534	HzChr04	10686912	10690150	2.38015	-0.983934	25.6784	0.000179602	0.00367277	0.316465	2.68325	0.124004	0.479627
MSTRG.2535	HzChr04	10711089	10727924	0.529012	1.808	23.0929	0.000291176	0.00516251	0.456141	1.64805	0.220366	0.594846	XP_021185994.1	ras-related and estrogen-regulated growth inhibitor-like protein [Helicoverpa armigera]
MSTRG.2537	HzChr04	10786062	10805005	1.88538	-3.74835	20.8755	0.000465563	0.00702468	-0.0993292	0.0184693	0.893882	0.994009	XP_021185961.1	alpha-tocopherol transfer protein-like isoform X1 [Helicoverpa armigera]
MSTRG.2537	HzChr04	10786062	10805005	1.88538	-3.74835	20.8755	0.000465563	0.00702468	-0.0993292	0.0184693	0.893882	0.994009	XP_021185962.1	alpha-tocopherol transfer protein-like isoform X2 [Helicoverpa armigera]
MSTRG.2538	HzChr04	10807630	10808399	0.135132	1.47536	1.35686	0.264029	0.495747	-2.68097	3.66891	0.0766152	0.410831
MSTRG.2539	HzChr04	10815592	10842558	0.870612	-1.04294	1.62001	0.224334	0.447089	1.10101	1.80391	0.201138	0.572092	XP_021185955.1	alpha-tocopherol transfer protein isoform X1 [Helicoverpa armigera]
MSTRG.2539	HzChr04	10815592	10842558	0.870612	-1.04294	1.62001	0.224334	0.447089	1.10101	1.80391	0.201138	0.572092	XP_021185957.1	alpha-tocopherol transfer protein isoform X3 [Helicoverpa armigera]
MSTRG.2540	HzChr04	10842530	10851761	3.31377	0.077807	0.0610446	0.808516	0.922991	-0.177095	0.308841	0.587353	0.875552
MSTRG.2541	HzChr04	10853682	10872993	2.87164	1.0582	4.10406	0.0627797	0.197503	0.964654	3.54552	0.081184	0.420348	XP_021186022.1	clavesin-1 [Helicoverpa armigera]
MSTRG.2542	HzChr04	10879836	10883423	2.621	0.00968825	0.00258035	0.960215	0.994074	-0.0563454	0.0866531	0.772858	0.950855	XP_021186004.1	general transcription factor 3C polypeptide 5 [Helicoverpa armigera]
MSTRG.2543	HzChr04	10883780	10885442	1.52164	0.3836	1.5111	0.239524	0.466561	-0.197558	0.400356	0.537252	0.850858
MSTRG.2544	HzChr04	10887199	10893917	3.72816	0.270328	5.07873	0.0410335	0.149028	0.150465	1.57077	0.230918	0.608673
MSTRG.2545	HzChr04	10894147	10899871	1.95083	2.51983	10.1351	0.00681437	0.0433292	1.05236	1.92069	0.187997	0.558092	XP_021185888.1	regulator of nonsense transcripts 2 [Helicoverpa armigera]
MSTRG.2546	HzChr04	10903449	10905827	2.22757	-0.388752	3.26551	0.0926003	0.253191	-0.356809	2.73854	0.120515	0.4741	XP_021185992.1	asparagine synthetase domain-containing protein CG17486 [Helicoverpa armigera]
MSTRG.2547	HzChr04	10906766	10910543	2.4736	-0.00900467	0.0018478	0.966329	0.994769	0.514193	6.0546	0.0276977	0.291227
MSTRG.2548	HzChr04	10910701	10913491	2.81419	0.206922	1.28648	0.276021	0.509657	0.0591098	0.104296	0.751576	0.943523	XP_021185998.1	cell division cycle protein 23 homolog [Helicoverpa armigera]
MSTRG.2549	HzChr04	10913719	10916375	4.85797	-0.220149	4.02458	0.0648576	0.2018	-0.251963	5.26668	0.0379619	0.32819
MSTRG.2552	HzChr04	10920892	10965376	1.10308	-0.204283	0.263088	0.616121	0.808012	-0.0266598	0.00446411	0.947688	1	XP_021185830.1	rab3 GTPase-activating protein catalytic subunit [Helicoverpa armigera]
MSTRG.2553	HzChr04	10925617	10925980	2.09971	-0.239612	0.250339	0.624803	0.814057	1.20688	5.96353	0.0288611	0.297208
MSTRG.2554	HzChr04	10962351	10963326	-1.51142	-0.861408	0.113706	0.743179	0.885469	-6.39368	3.53134	0.0906979	0.434366	XP_021186007.1	myrosinase 1-like [Helicoverpa armigera]
MSTRG.2555	HzChr04	10964163	10964663	-1.66501	-4.42548	2.1658	0.180986	0.386355	0	0	1	1
MSTRG.2558	HzChr04	10984534	10989994	4.58885	0.0291438	0.0188604	0.892751	0.965661	-0.34451	2.62858	0.127577	0.485341	XP_021185910.1	TATA box-binding protein-like protein 1 [Helicoverpa armigera]
MSTRG.2559	HzChr04	10990716	10995531	-0.512011	0.117619	0.0603428	0.809571	0.923427	0.619026	1.65281	0.219737	0.594136
MSTRG.2561	HzChr04	11009477	11028363	-0.524375	-1.78156	1.76114	0.206246	0.422265	1.27611	0.860627	0.369671	0.739627	XP_021185899.1	villin-like protein quail isoform X2 [Helicoverpa armigera]
MSTRG.2563	HzChr04	11025143	11026549	3.26748	-1.86531	0.534407	0.479199	0.70496	-8.07265	2.76029	0.123268	0.478206
MSTRG.2565	HzChr04	11032714	11038522	5.63542	-0.287729	2.08384	0.171186	0.372889	-0.369048	3.40288	0.0866563	0.427348	XP_021185900.1	elongation factor Ts, mitochondrial isoform X1 [Helicoverpa armigera]
MSTRG.2566	HzChr04	11112806	11125573	1.24221	-0.210482	0.0902527	0.768381	0.900241	-0.551537	0.596544	0.45306	0.801956	XP_021185895.1	uncharacterized protein LOC110373087 [Helicoverpa armigera]
MSTRG.2566	HzChr04	11112806	11125573	1.24221	-0.210482	0.0902527	0.768381	0.900241	-0.551537	0.596544	0.45306	0.801956	XP_021200128.1	uncharacterized protein LOC110383653 [Helicoverpa armigera]
MSTRG.2567	HzChr04	11114182	11161223	1.14521	-0.547573	2.03894	0.17556	0.379102	0.540323	2.02102	0.177344	0.544464	XP_021186003.1	uncharacterized protein LOC110373147 [Helicoverpa armigera]
MSTRG.2568	HzChr04	11162019	11170319	0.907955	-0.369531	1.26443	0.279997	0.513242	0.239246	0.533964	0.477172	0.81686	XP_021185958.1	BRCA2-interacting transcriptional repressor EMSY [Helicoverpa armigera]
MSTRG.2569	HzChr04	11170178	11181886	7.64562	-0.438457	9.78468	0.0075201	0.0465607	-0.152685	1.18939	0.294133	0.676372	XP_021185960.1	aspartate aminotransferase, mitochondrial [Helicoverpa armigera]
MSTRG.2570	HzChr04	11183700	11194205	0.443389	5.30238	21.1112	0.000443631	0.00678263	0.999274	1.16221	0.299684	0.681768	XP_021185868.1	WD repeat and FYVE domain-containing protein 2 [Helicoverpa armigera]
MSTRG.2573	HzChr04	11213640	11259274	1.92434	0.412689	1.61628	0.224627	0.447248	1.13248	12.0966	0.00376601	0.150235	XP_021186018.1	myosin-VIIa isoform X2 [Helicoverpa armigera]
MSTRG.2574	HzChr04	11241863	11391641	4.39234	-0.0709446	0.194029	0.666407	0.842245	-0.0200369	0.0155	0.902716	0.996573	XP_021185862.1	transmembrane 9 superfamily member 2 [Helicoverpa armigera]
MSTRG.2574	HzChr04	11241863	11391641	4.39234	-0.0709446	0.194029	0.666407	0.842245	-0.0200369	0.0155	0.902716	0.996573	XP_021185864.1	suppressor of hairless protein isoform X2 [Helicoverpa armigera]
MSTRG.2574	HzChr04	11241863	11391641	4.39234	-0.0709446	0.194029	0.666407	0.842245	-0.0200369	0.0155	0.902716	0.996573	XP_021186012.1	probable histone-lysine N-methyltransferase CG1716 [Helicoverpa armigera]
MSTRG.2575	HzChr04	11274956	11280118	2.98352	-0.356482	4.98149	0.0427371	0.152809	-0.0238137	0.022231	0.883632	0.991251	XP_021185859.1	DNA repair protein complementing XP-G cells homolog isoform X1 [Helicoverpa armigera]
MSTRG.2576	HzChr04	11293277	11299201	2.41085	-3.23992	25.1417	0.000204235	0.0040327	-2.99487	21.4073	0.000417738	0.0791409
MSTRG.2578	HzChr04	11321274	11322683	2.0095	1.17973	10.5937	0.00585394	0.0391081	0.519633	2.066	0.172908	0.539669
MSTRG.2579	HzChr04	11327359	11328039	0.491988	1.10597	0.172194	0.685705	0.852454	-7.31812	2.87045	0.116746	0.467083
MSTRG.2581	HzChr04	11348056	11351131	0.390215	-0.341026	0.828415	0.378358	0.613944	-0.106476	0.0800475	0.781434	0.954863
MSTRG.2582	HzChr04	11356824	11357194	-0.82035	0.027254	0.000264589	0.987353	1	0	0	1	1
MSTRG.2583	HzChr04	11359582	11363397	0.886616	1.24554	2.00052	0.17964	0.385027	-0.322953	0.138914	0.715085	0.92948	XP_021186010.1	cyclic nucleotide-gated cation channel beta-1-like [Helicoverpa armigera]
MSTRG.2585	HzChr04	11392120	11394202	8.41107	-0.0389601	0.0406463	0.843164	0.940517	-0.16731	0.748549	0.40173	0.765343
MSTRG.2586	HzChr04	11395377	11414392	5.43966	-1.13356	62.5188	1.72664e-06	0.000182634	-0.0462361	0.105924	0.749717	0.943019	XP_021185833.1	glycerol-3-phosphate dehydrogenase, mitochondrial [Helicoverpa armigera]
MSTRG.2589	HzChr04	11448281	11448574	0.0334727	9.01825	4.22848	0.0677899	0.207581	-7.31785	2.911	0.119872	0.47359
STRG.2361	HzChr04	11474032	11474446	-1.11737	6.31539	4.1314	0.0655211	0.202982	0.328038	0.0202885	0.889167	0.993511
STRG.2363	HzChr04	11494049	11530931	-1.98729	0	0	1	1	-5.64932	3.26115	0.110255	0.458071
MSTRG.2594	HzChr04	11581926	11585278	-0.569923	0.138166	0.0170401	0.898027	0.968951	0.131669	0.0156841	0.902145	0.996573
MSTRG.2595	HzChr04	11585214	11611963	1.42717	0.223251	0.0457741	0.833749	0.937612	0.454748	0.185034	0.673793	0.913868	XP_021193828.1	carbohydrate sulfotransferase 11 [Helicoverpa armigera]
MSTRG.2596	HzChr04	11615239	11617997	3.24307	0.0645731	0.0421544	0.840343	0.939413	-0.301321	0.911518	0.356243	0.729105	XP_021193827.1	protein arginine N-methyltransferase 1 [Helicoverpa armigera]
MSTRG.2597	HzChr04	11617755	11671249	0.194283	-0.277841	0.0690453	0.796655	0.917041	1.26659	1.441	0.250388	0.628151	XP_021193824.1	calcium/calmodulin-dependent 3',5'-cyclic nucleotide phosphodiesterase 1 isoform X1 [Helicoverpa armigera]
MSTRG.2599	HzChr04	11718608	11719889	0.309056	-0.261682	0.311681	0.585597	0.787962	0.506981	1.24277	0.28398	0.66616
STRG.2371	HzChr04	11757920	11760597	-0.823514	0.367207	0.169738	0.686674	0.852997	-0.894935	1.04084	0.325184	0.706388	XP_021193832.1	maltase 2-like [Helicoverpa armigera]
MSTRG.2600	HzChr04	11763112	11768337	4.15482	-1.63066	4.28278	0.0579737	0.18688	-1.24383	2.5268	0.134804	0.493831
MSTRG.2601	HzChr04	11768863	11805213	6.75617	-1.36042	3.27693	0.0923136	0.252712	-1.57502	4.34273	0.0564603	0.376515	XP_021193831.1	maltase A3-like [Helicoverpa armigera]
MSTRG.2602	HzChr04	11799287	11799590	0.182112	5.43642	3.92745	0.0715855	0.214541	0.124761	0.00517609	0.943865	1
MSTRG.2603	HzChr04	11802151	11803394	-1.07919	-1.81821	0.701405	0.422557	0.655473	-5.73542	4.0925	0.0716329	0.402528
MSTRG.2604	HzChr04	11810256	11870246	-0.591584	8.5437e-06	3.96506e-08	0.999844	1	1.15365	3.24357	0.0935949	0.43823	XP_021193824.1	calcium/calmodulin-dependent 3',5'-cyclic nucleotide phosphodiesterase 1 isoform X1 [Helicoverpa armigera]
MSTRG.2606	HzChr04	11877583	11878410	-0.376777	7.74349	5.7149	0.0387504	0.14342	2.26853	0.966895	0.349452	0.72382
MSTRG.2607	HzChr04	11896294	11925879	1.37098	5.42953	16.3085	0.00127994	0.0139332	1.74013	3.66376	0.0767996	0.410831	XP_021197577.1	uncharacterized protein LOC110381564 [Helicoverpa armigera]
MSTRG.2608	HzChr04	11907799	11908183	3.25187	-3.26927	6.90473	0.0225328	0.0989962	-0.0536908	0.00226897	0.962815	1
MSTRG.2610	HzChr04	12082218	12193221	3.80004	0.19848	2.00783	0.178673	0.383653	-0.0973008	0.485574	0.497482	0.829379	XP_021196996.1	zinc finger protein chinmo isoform X3 [Helicoverpa armigera]
MSTRG.2613	HzChr04	12127451	12131593	2.71356	-0.452113	0.369563	0.553219	0.765127	-0.831348	1.24928	0.282969	0.664618	XP_021197190.1	larval/pupal rigid cuticle protein 66-like isoform X3 [Helicoverpa armigera]
MSTRG.2615	HzChr04	12221599	12223492	3.48513	-1.25315	4.10361	0.0627925	0.197503	-0.121061	0.0380579	0.8482	0.977479
MSTRG.2616	HzChr04	12255149	12258480	8.82991	-0.291068	2.26055	0.155249	0.349869	-0.375547	3.75698	0.0733253	0.404303	XP_021197799.1	cytochrome b-c1 complex subunit Rieske, mitochondrial [Helicoverpa armigera]
MSTRG.2617	HzChr04	12259666	12310541	3.36645	-0.207756	1.04792	0.323601	0.56023	-1.04895	25.6237	0.000181384	0.0593352	XP_021197116.1	protein spire isoform X5 [Helicoverpa armigera]
MSTRG.2619	HzChr04	12318329	12428471	0.900462	0.0793831	0.0191644	0.891903	0.965291	-1.10455	3.74673	0.0737486	0.405149
MSTRG.2621	HzChr04	12339392	12345372	0.246155	0.504508	1.91524	0.188363	0.396642	-1.20374	10.2773	0.00644899	0.181613
MSTRG.2623	HzChr04	12386802	12387139	-0.161939	7.62452	3.78852	0.0891074	0.247065	6.4408	2.61463	0.14624	0.507164
MSTRG.2624	HzChr04	12428575	12452422	2.67337	0.112623	0.199292	0.662219	0.839651	-0.0863709	0.115827	0.738731	0.939301
MSTRG.2625	HzChr04	12452668	12466465	2.21138	1.70405	19.8468	0.000563766	0.00790187	-0.144188	0.155252	0.699591	0.922961	XP_021197484.1	uncharacterized protein LOC110381463 isoform X1 [Helicoverpa armigera]
MSTRG.2625	HzChr04	12452668	12466465	2.21138	1.70405	19.8468	0.000563766	0.00790187	-0.144188	0.155252	0.699591	0.922961	XP_021197489.1	uncharacterized protein LOC110381463 isoform X2 [Helicoverpa armigera]
MSTRG.2627	HzChr04	12467812	12469050	6.78482	-0.237235	1.18315	0.295429	0.529833	-0.660326	9.08178	0.00946223	0.20514
MSTRG.2628	HzChr04	12468731	12470377	3.94574	0.174899	2.59147	0.130075	0.31333	-0.411155	14.2572	0.00209531	0.124994
MSTRG.2629	HzChr04	12472239	12532705	3.84083	0.121669	0.522819	0.481721	0.706426	0.13233	0.616529	0.445615	0.796333	XP_021197643.1	patronin isoform X2 [Helicoverpa armigera]
MSTRG.2629	HzChr04	12472239	12532705	3.84083	0.121669	0.522819	0.481721	0.706426	0.13233	0.616529	0.445615	0.796333	XP_021197658.1	patronin isoform X4 [Helicoverpa armigera]
MSTRG.2629	HzChr04	12472239	12532705	3.84083	0.121669	0.522819	0.481721	0.706426	0.13233	0.616529	0.445615	0.796333	XP_021197706.1	patronin isoform X10 [Helicoverpa armigera]
MSTRG.2629	HzChr04	12472239	12532705	3.84083	0.121669	0.522819	0.481721	0.706426	0.13233	0.616529	0.445615	0.796333	XP_021197713.1	patronin isoform X11 [Helicoverpa armigera]
MSTRG.2629	HzChr04	12472239	12532705	3.84083	0.121669	0.522819	0.481721	0.706426	0.13233	0.616529	0.445615	0.796333	XP_021197723.1	patronin isoform X12 [Helicoverpa armigera]
MSTRG.2629	HzChr04	12472239	12532705	3.84083	0.121669	0.522819	0.481721	0.706426	0.13233	0.616529	0.445615	0.796333	XP_021197730.1	patronin isoform X13 [Helicoverpa armigera]
MSTRG.2631	HzChr04	12542961	12597198	10.0008	0.0334247	0.00624136	0.938177	0.986389	-1.02974	5.79975	0.0307786	0.303687	XP_021197229.1	translationally-controlled tumor protein homolog [Helicoverpa armigera]
MSTRG.2632	HzChr04	12547383	12785052	-0.469044	-6.92951	4.11288	0.0660454	0.204131	-1.22287	0.258737	0.620479	0.889486	XP_021196970.1	leucine-rich repeat-containing protein let-4-like isoform X2 [Helicoverpa armigera]
MSTRG.2633	HzChr04	12722222	12723118	3.87086	6.26608	71.3161	8.67323e-07	0.000125866	-0.178411	0.100387	0.756157	0.945105
MSTRG.2635	HzChr04	12752620	12753024	3.40601	-0.872082	3.37959	0.087855	0.24506	-0.311277	0.441231	0.517589	0.840184
MSTRG.2636	HzChr04	12758915	12760120	0.988288	0.543004	1.22583	0.28715	0.521487	-0.516985	1.16368	0.299202	0.681375
MSTRG.2638	HzChr04	12928638	12929047	3.65633	0.516655	1.90795	0.189376	0.398275	-1.26829	11.1771	0.00497735	0.16622
MSTRG.2644	HzChr04	13180481	13180728	3.53786	-2.69267	5.25727	0.0382882	0.142414	2.49462	4.44665	0.0539465	0.370414
MSTRG.2648	HzChr04	13317165	13399208	1.79812	-0.173975	0.435082	0.520365	0.738456	-0.210386	0.620072	0.444338	0.794727	XP_021197031.1	uncharacterized protein LOC110381142 isoform X1 [Helicoverpa armigera]
MSTRG.2648	HzChr04	13317165	13399208	1.79812	-0.173975	0.435082	0.520365	0.738456	-0.210386	0.620072	0.444338	0.794727	XP_021197041.1	uncharacterized protein LOC110381142 isoform X2 [Helicoverpa armigera]
MSTRG.2648	HzChr04	13317165	13399208	1.79812	-0.173975	0.435082	0.520365	0.738456	-0.210386	0.620072	0.444338	0.794727	XP_021198090.1	peroxisome biogenesis factor 1 [Helicoverpa armigera]
MSTRG.2650	HzChr04	13326503	13337714	1.36533	-0.583369	1.75272	0.207052	0.423057	-0.436808	0.958222	0.344489	0.720603
MSTRG.2651	HzChr04	13361413	13361717	1.1453	0	0	1	1	-4.81707	2.49434	0.154601	0.517934
MSTRG.2652	HzChr04	13381729	13388540	1.7258	-0.452208	1.24012	0.284473	0.51815	0.223287	0.304547	0.589873	0.876629	XP_021197012.1	G2/mitotic-specific cyclin-B3 isoform X1 [Helicoverpa armigera]
MSTRG.2653	HzChr04	13399460	13404953	2.39515	-0.230371	0.601558	0.451075	0.682163	-0.517651	2.95569	0.107919	0.454721
[truncated: 12,708 more rows]
